# Supplementary material
Source: publisher site journal article supplement (https://www.degruyterbrill.com/publication/isbn/9783110432879/downloadAsset/9783110432879_Elektronischer_Anhang_1.pdf)
Supplement: Supplementary file 1 [file 9783110432879_Elektronischer_Anhang_1.pdf]

# 1 Diskursauffächerung: Sachverhaltskonstitution

Dieser zusammenfassende Teil der Untersuchung wurde aus der Buchpublikation in den vorliegenden elektronischen Anhang ausgelagert. Verweise auf Kapitel und auf Literatur beziehen sich daher auf erstgenannte. Verweise auf den vorliegenden elektronischen Anhang sind dagegen mit (→ dieser Anhang) gekennzeichnet.

## Inhaltsverzeichnis

|        |                                                                              |     |
|--------|------------------------------------------------------------------------------|-----|
| 1      | Diskursauffächerung: Sachverhaltskonstitution .....                          | 1   |
| 1.1    | Der Sachverhalt UNTERNEHMENSIDENTITÄT .....                                  | 2   |
| 1.1.1  | <i>Identität und Identity</i> .....                                          | 2   |
| 1.1.2  | <i>Corporate Identity</i> .....                                              | 4   |
| 1.1.3  | <i>Identifizier* und Identifikation</i> .....                                | 5   |
| 1.1.4  | <i>Person, Persönlichkeit, Charakter, Geist</i> .....                        | 7   |
| 1.1.5  | <i>Selbst*</i> .....                                                         | 8   |
| 1.1.6  | <i>Profil und Porträt</i> .....                                              | 13  |
| 1.1.7  | <i>Bild und Image</i> .....                                                  | 14  |
| 1.1.8  | <i>Ruf und Reputation</i> .....                                              | 16  |
| 1.1.9  | Fazit: UNTERNEHMENSIDENTITÄT .....                                           | 18  |
| 1.2    | Sachverhalte, die UNTERNEHMENSIDENTITÄT kokonstituieren .....                | 21  |
| 1.2.1  | AFFEKTE/EMOTIONEN .....                                                      | 21  |
| 1.2.2  | VERHALTENSEIGENSCHAFTEN .....                                                | 31  |
| 1.2.3  | TÄTIGKEITEN .....                                                            | 56  |
| 1.2.4  | EXPERTISE .....                                                              | 63  |
| 1.2.5  | NORMEN UND PRINZIPIEN .....                                                  | 68  |
| 1.2.6  | Fazit: NORMEN UND PRINZIPIEN .....                                           | 102 |
| 1.2.7  | ERZEUGNISSE/PHYSISCHE OBJEKTE .....                                          | 103 |
| 1.2.8  | ANSPRUCHSGRUPPEN/SOZIALE OBJEKTE .....                                       | 129 |
| 1.2.9  | ZIELE/ERFÜLLUNGSZUSTÄNDE .....                                               | 152 |
| 1.2.10 | ÖKONOMISCHE KENNZAHLEN/RATIONALITÄTSKRITERIEN .....                          | 174 |
| 1.2.11 | ÖKONOMISCHES UMFELD/KONTEXT .....                                            | 187 |
| 1.2.12 | EREIGNISSE .....                                                             | 202 |
| 1.2.13 | ORTE .....                                                                   | 218 |
| 1.2.14 | UMWELT .....                                                                 | 237 |
| 1.2.15 | ZEIT .....                                                                   | 252 |
| 1.2.16 | Fazit: Weitere Sachverhalte, die UNTERNEHMENSIDENTITÄT kokonstituieren ..... | 269 |

Auf der Diskursebene erfolgt schließlich die Darstellung der konkreten inhaltlich-ausdrucksseitigen Auffächerung der konstituierten Sachverhalte im Diskurs mittels der (handlungsleitenden) Konzepte als Interpretationshypothesen – diese zeigen als sprachliche Nutzungsercheinungen das hypothetisch unterstellte und theoretisch modellierte sprachliche Verwendungswissen der Unternehmen bei der Konstruktion von UNTERNEHMENSIDENTITÄT an. Sie offenbaren, wie spezifische Sachverhalte, aus denen sich UNTERNEHMENSIDENTITÄT kokonstituiert, kraft sprachlicher Zeichen im Diskurs spezifisch perspektiviert werden. Um die Struktur der Sachverhalte nachzuzeichnen, werden die (handlungsleitenden) Konzepte als Verbünde „verknüpfter und vernetzter Sachverhalte“ (Felder 2009a, 35) gebraucht, die als inhaltsseitige Korrelate der Ausdrucksseite fungieren. Ebenfalls lassen sich aus den (handlungsleitenden) Konzepten im Hinblick auf die einzelnen Sachverhalte die im Diskurs vorgenommenen

Sprachhandlungen der Akteure (re)konstruieren (vgl. Vogel F. 2009, 40). Dieses Kapitel dient daher der Synthese der vorangegangenen subdiskursiven Ebenen und kann der Bedeutung von UNTERNEHMENSIDENTITÄT in einem Kompendium Form geben.

## 1.1 Der Sachverhalt UNTERNEHMENSIDENTITÄT

### 1.1.1 Identität und Identity

Insgesamt fällt auf, dass die Ausdrücke *\*identität*<sup>1</sup> oder *identity* seltener genutzt werden als die anderen Ausdrücke des Wortfeldes, auf die bereits in Kapitel → 7.1.1.2 verwiesen wurde. Im Akteursvergleich wird offenbar, dass nur ein Drittel der Unternehmen (jedoch in allen Sektoren) *\*identität* oder *identity* verwendet. Im Plural wird *Identität* kaum gebraucht.<sup>2</sup> Das Kompositum *Unternehmensidentität* zeigt im Determinans klar den ›Identitätsträger‹ (,Unternehmen‘) an:

Der Kern der Unternehmensidentität ist und bleibt die Tradition als Pionier des Automobils. Auf dieses Erbe, das Daimler von allen Wettbewerbern unterscheidet, gründen sich die Innovationskraft des Unternehmens und sein Qualitätsanspruch. (Daimler Daimler hat das Automobil erfunden)

HENKEL setzt den Ausdruck *Unternehmensidentität* sprachlich mit dem englischen Wort *Corporate Identity* gleich:

Noch nie in der 130-jährigen Firmengeschichte haben sich Management und Mitarbeiter so intensiv mit den Unternehmensgrundsätzen und der Unternehmensidentität (Corporate Identity) von Henkel beschäftigt wie in den vergangenen Jahren. (Henkel Corporate Identity)

METRO beruft sich durch die Komposita *Leistungsidentität* und *Führungsidentität* sowie das Syntagma *gesellschaftspolitische Identität* auf drei ›Identitätsteile‹, die auch als Teilüberschriften (Makropropositionen) im Text *Metro Corporate Principles* erscheinen:

- **Leistungsidentität**
  - Wirtschaftliche Stärke
  - Nachhaltige Marktdurchdringung
  - Marktposition
  - Strategische Stärke
  - Innovationsfähigkeit
- **Führungsidentität**
  - Strategische Steuerung
  - Konzepthoheit der Vertriebslinien
  - Vielfalt, Chancengleichheit und Toleranz
  - Leistungsorientierte Führung nach dem „Best-Practice-Prinzip“
- **Gesellschaftspolitische Identität**
  - Politische Mitgestaltung
  - Wahrnehmung Öffentlicher [sic, S.B.] Aufgaben
  - Corporate Social Responsibility (Metro Corporate Principles)

THYSSENKRUPP nutzt *Identität\** im Kompositum *Identitätselemente* als Determinans und deutet daher ebenso den mehrteiligen Aufbau von UNTERNEHMENSIDENTITÄT an:

---

<sup>1</sup> Das Basislexem *\*identität\** erscheint 62x im Korpus in Lesarten, die für die Analyse relevant sind (→ 2.2.1).

<sup>2</sup> Vgl. dazu: „Wir fördern den Erhalt nationaler Identitäten und Kulturen, um möglichst marktnah und kreativ zu sein.“ (HeidelbergCement Corporate Mission).

Sie ist zudem so angelegt, dass die traditionsreichen Identitätselemente – der Bogen bei Thyssen und die Drei Ringe [sic, S.B.] bei Krupp auch weiterhin bestehen bleiben. (ThyssenKrupp Die Konzernmarke)

Diese empirischen Befunde bestätigen die Eingangshypothese der Arbeit, dass UNTERNEHMENSIDENTITÄT aus verschiedenen Teilen konstruiert wird (›Identitätsteile‹). Auf der erweiterten lexikalischen Ebene stellt sich die Frage, welche musterhaften Syntagmen paradigmatisch für *\*identität* und *identity* sind.<sup>3</sup> Beide Ausdrücke werden auf zwei Arten attribuiert und weisen dadurch auf das Konzept ›Identitätsart‹ hin: durch das vorangestellte Adjektiv *eigene\** sowie das Possessivpronomen *unsere\** (,besitzanzeigend‘):

In der Philosophie der Lufthansa kommt der dezentralen Marktstrategie eine Schlüsselrolle zu. Dieses gilt für die Geschäftsfelder des Konzerns ebenso wie für die Verbund-Airlines, die eigenständig in ihrem Heimatmarkt arbeiten – mit eigener Identität und eigenem Produkt. (Lufthansa GB 2010)

Deutsche Bank: Unsere Identität. (Deutsche Bank GB 2010)

Zweitens wird eine Attribution auch durch *unverwechselbar\** oder *besonder\** vorgenommen (,alleinstellend‘).<sup>4</sup> Beleuchtet man Nominalphrasen, taucht *Identität* darin häufig als Genitivattribut auf:

Gleichzeitig verleiht die neue Marke der neuen Commerzbank einen modernen, dynamischen und unverwechselbaren Auftritt. Dieser unterstreicht den hohen Anspruch der neuen Commerzbank und ist Ausdruck ihrer Identität. (Commerzbank die Marke der neuen Commerzbank)

Darüber hinaus ist gesellschaftliches Engagement fester Bestandteil unserer globalen Identität. (Daimler Unternehmensinformationen 2010)

Der Ausdruckskomplex *Bestandteil unserer globalen Identität* lässt wiederum auf mehrere ›Identitätsteile‹ schließen. Bei der weiteren Auswertung von Nominalphrasen und Syntagmen zeigen sich diverse erkenntnisfördernde substantivische n-Gramme, die *Identität* mit anderen Ausdrücken auf der Sprachoberfläche verknüpfen, etwa *Identität und Orientierung* (HENKEL Geschäftsbericht 2010). Neben diesem Beleg offenbaren sich im Korpus die Verbindungen *Identität und Tradition*, *Identität, eine klare Ausrichtung und verbindliche Werte*, *Identität und Philosophie*, *Vision, Werte, Identität* sowie *Identität und Selbstverständnis*. Erwartungsgemäß wird *Identität* somit mehrfach mit anderen Hochwertwörtern (→ 7.1.1.2) verknüpft.

Auf der Satzebene sind die Verbanschlüsse von *\*identität* und *identity* aufschlussreich für die weitere Betrachtung: Diese sind beständiger realisiert durch statische Verben, d.h. Zustandsverben (*verfügen, bewahren*) und Vorgangsverben (*geben, stiften*):

Gemeinsame Wertvorstellungen als Teil einer modernen Unternehmenskultur stiften Identität und sind Basis für Wachstum und nachhaltigen Erfolg. (Commerzbank Die Werte der Commerzbank)<sup>5</sup>

---

<sup>3</sup> Dafür wurden die Kookkurrenzprofile der gefundenen Lexeme nach syntagmatischen Mustern analysiert.

<sup>4</sup> Vgl. dazu auch das Adjektiv *individuell\**, das in Bezug auf MARKEN und PRODUKTE genutzt wird: „Die Initiativen, die sich aus den individuellen Identitäten und Werten der einzelnen Marken ergeben, nehmen verschiedenste Formen an.“ (Adidas GB 2010).

<sup>5</sup> Vgl. dazu auch das adjektivische Kompositum *identitätsstiftend\**, z.B. *identitätsstiftende Wertordnung*.

Auf der anderen Seite offenbaren jedoch auch Aktionsverben einen dynamischen Charakter von UNTERNEHMENSIDENTITÄT:

Wir streben eine führende Markt- und Finanzposition an, die es uns ermöglicht, die BASF erfolgreich und unabhängig mit eigener, unverwechselbarer Identität weiter zu entwickeln. (BASF Gemeinsam Zukunft gestalten)

Vielmehr werden wir alles tun, um die Identität von Henkel weiter zu stärken. (Henkel Corporate Identity)

Durch diese Verbindungen mit Verben wird das Konzept ›Identitätsart‹ zwischen den Polen ‚statisch‘ und ‚dynamisch‘ verortet; gleichzeitig wird das Konzept ›Identitätshandlung‹ offenbar (,Identitätsentwicklung‘, ,Identitätsstärkung‘, ,Identitätsstiftung‘ etc.). Durch die zusätzliche Betrachtung der Verbvalenzstruktur der Sätze können auch Subjekte eruiert werden (vgl. Köller 2004, 354), denen Identität zugeschrieben wird. Diese lassen sich insofern kategorisieren, als die ›Identitätssubjekte‹, welche die Subjektkonstituente im Satz ausfüllen, meist ‚Unternehmen‘ sind (durch Eigennamen oder das Personalpronomen *wir* ausgedrückt); seltener sind es ‚Marken‘ (*adidas*, *Reebok*<sup>6</sup>). In manchen Verwendungsweisen gibt es zudem syntaktisch auch ›Identitätsobjekte‹, die sozusagen Identität an ›Identitätssubjekte‹ *geben* (meist ‚Mitarbeiter‘ oder ‚Werte‘). Dabei fallen schließlich auch Sprachhandlungen durch modale Satzanschlüsse auf, die das Konzept ›Identität als Instrument/Mittel für ein höheres Ziel‹ evozieren. Im folgenden Beleg von BASF dient IDENTITÄT als MITTEL gegen HERAUSFORDERUNGEN (→ dieser Anhang, 1.12.2):

Um diesen Herausforderungen zu begegnen, brauchen wir eine unverwechselbare Identität, eine klare Ausrichtung und verbindliche Werte, denen wir in unserer täglichen Arbeit folgen. (BASF Gemeinsam Zukunft gestalten)

### 1.1.2 Corporate Identity

Das englische Wort *Corporate Identity* taucht ähnlich häufig wie die deutsche Bezeichnung *Unternehmensidentität* auf:

Die Entwicklung der Dachmarkenstrategie und die Bedeutung von Corporate Identity und Corporate Design werden in dieser kleinen Broschüre erläutert. (Henkel Corporate Identity)

HENKEL nutzt *Corporate Identity* zur Verknüpfung mit dem Eigennamen, woraus sich der Neologismus *Henkel Identity* ergibt. Hierdurch wird eine Begriffsbesetzung und doppelte Selbstreferentialität durch den Eigennamen eingeleitet. Adjektivische Attributionen finden sich bei *Coprporate Identity* durch *neu\** (›Identitätsart‹ ‚neu‘), *ausgeprägt\**, *stimmig\** sowie *konsistent\** (›Identitätsart‹ ‚einheitlich‘). Auffällig bei der Betrachtung des näheren Kontextes der Belege ist, dass *Corporate Identity* vielfach in sequentieller Reihung mit substantivischen

---

<sup>6</sup> Vgl. dazu: „*adidas* und *Reebok* verfügen jeweils über eine eigene Identität und Tradition, über eigene Technologien und Designs sowie ein eigenes Image.“ (Adidas GB 2010).

n-Grammen verbunden wird, die strategische Konzepte evozieren (u.a. durch die Lexeme *Konzept, Design, Kommunikationsinstrument, Marke, Strategie, Leistung und Erfolg*):

Unsere Kommunikationsstrategie wird von unserem neuen Corporate-Identity-Konzept und -Design unterstützt, welches speziell nach den digitalen Bedürfnissen unserer Konsumenten entwickelt wurde. (Allianz GB 2010)

Die Satzebene offenbart wenige musterhafte Verbindungen mit Verben, da primär mit Nominalisierungen gearbeitet wird. Syntaktisch realisierte ›Identitätssubjekte‹ von *Corporate Identity* sind wiederum ‚Unternehmen‘; ›Identitätsobjekte‹ sind ‚Bedürfnisse der Konsumenten‘, ‚Management‘ und ‚Mitarbeiter‘. Auffallend ist die konsekutive Verknüpfung bei HENKEL (durch *dass*), die wiederum auf ›Identität als Instrument/Mittel für ein höheres Ziel‹ hinweist:

Dahinter [hinter der Neuausrichtung, S.B.] steht die durch mehrere Studien belegte Erkenntnis, dass eine ausgeprägte und stimmige Corporate Identity maßgeblich zum wirtschaftlichen Erfolg eines Unternehmens beiträgt. (Henkel Corporate Identity)

### 1.1.3 Identifizier\* und Identifikation

Gut ein Drittel der Unternehmen<sup>7</sup> verwenden den Wortstamm *identifizier\** als Verb sowie das Substantiv *Identifikation* (besonders häufig BASF, HENKEL, FRESENIUS und FRESENIUS MEDICAL CARE). Das Verb *identifizieren* in reflexiver Form in Kombination mit einer Präpositionalphrase (*sich (X) mit Y identifizieren*) ist dabei aufschlussreich, da sich in diesen Aussagen *jemand/etwas* (›Identitätssubjekte‹) *mit jemandem/etwas* (›Identitätsobjekte‹) *identifiziert* (vgl. Duden 2001, 816):<sup>8</sup>

An der letzten Umfrage, die Anfang 2010 in 28 Sprachen durchgeführt wurde, nahmen 84 % der Beschäftigten teil. Die Gesamtergebnisse belegen, dass sich die Mehrheit der Beschäftigten stark mit Merck identifiziert und sich engagiert für seinen Erfolg einsetzt. (Merck GB 2010)

Nach Durchsicht aller Belege lassen sich, aufgrund der syntaktisch klar realisierten Valenzstruktur auf der Satzebene mittels Subjekt- und Objektreferenten des Identifizierens, als ›Identitätssubjekte‹ die ‚Mitarbeiter‘ (*uns, man, Mitarbeiter, Mehrarbeiter der Beschäftigten*) und ‚Kunden‘ (*Konsumenten*) herausarbeiten; für ›Identitätsobjekte‹ tritt das ‚Unternehmen‘ auf, was durch Eigennamen (*Merck, Henkel*), das Substantiv *Unternehmen* sowie Hyponyme diesbezüglich (z.B. *Unternehmergeist*) ausgedrückt wird. Das Substantiv *Identifikation* liefert

---

<sup>7</sup> Dies bezieht sich auf ADIDAS, BASF, COMMERZBANK, HENKEL, LUFTHANSA, DEUTSCHE BANK, FRESENIUS, FMC, HEIDELBERGCEMENT, METRO, THYSSENKRUPP und MERCK.

<sup>8</sup> Das Verb *identifizieren* besitzt drei Lesarten: a) reflexiv + Präpositionalphrase (mit der Präposition *mit*); b) transitiv + Präpositionalphrase (mit der Präposition *mit*); c) transitiv ohne weitere Präpositionalphrase. Lesart a) ist inhärent reflexiv, d.h. ‚sich‘ ist streng genommen kein Argument mehr im Satz (wie in Lesart b). Das führt dazu, dass sich die Lesart a) von der Lesart b) unterscheidet: a) jmd. identifiziert sich mit etw., d.h. etw. zu seiner eigenen Sache machen; b) jmd./etw. mit jmd./etw. gleichsetzen, die Übereinstimmung zwischen beiden konstatieren; c) etw. erkennen/wiedererkennen, dingfest machen (vgl. Duden 2001, 816). Lesart b) und c) sind für die Analyse peripher (→ 2.2.1).

ebenfalls untersuchungsrelevante Belege<sup>9</sup> durch präpositionale Anschlüsse (*Identifikation mit X*), die sich in ›Identitätssubjekte‹ und ›Identitätsobjekte‹ aufschlüsseln lassen. In diesen Belegen sind die ›Identitätssubjekte‹ mehrheitlich die ‚Mitarbeiter‘ (*Mitarbeiter, Personals*):

Hier ist es unser Ziel, die Identifikation des Personals mit dem Unternehmen zu fördern. (FMC GB 2010)

ALLIANZ bezieht sich dagegen auf ‚Kunden und Aktionäre‘:

Eine starke Marke sorgt für Vertrauen und fördert bei Kunden und Anteilseignern die Identifikation mit dem Unternehmen. (Allianz GB 2010)

›Identitätsobjekte‹ wird in allen Belegen wiederum durch das ‚Unternehmen‘ bedient. Die TELEKOM besetzt die Konzeptrollen im folgenden Beispiel nicht klar (*Identifikation unter dem „T“*), weshalb diese vom Rezipienten aus dem Kontext erschlossen werden müssen:

Nach innen gibt das neue Leitbild damit allen Mitarbeitern im Konzern Orientierung für ihr Denken und Handeln im Sinne des Kunden und bildet ein starkes Band für die konzernweite Zusammenarbeit und Identifikation unter dem „T“. T-Spirit wirkt aber nicht nur intern – sondern auch nach außen: Vision und Werte verdeutlichen die verantwortungsbewusste Rolle der Deutschen Telekom in Wirtschaft und Gesellschaft. (Telekom T-Spirit – Das Leitbild der Deutschen Telekom)

Die Belege zu *Identifikation* liefern jedoch – neben der Zuweisung von ›Identitätssubjekte‹ und ›Identitätsobjekte‹ – noch weitere aufschlussreiche Erkenntnisse: Sie zeigen diverse Sachverhaltsverknüpfungen durch vermeintliche Kausalitätsbezüge an, welche ›Identitätsziele‹ und ›Identitätsfaktoren‹ nahelegen:

Nach innen stärkt verantwortliches und nachhaltiges Wirtschaften die Identifikation der Mitarbeiter mit dem Unternehmen und ihre Motivation. (Henkel GB 2010)

Auch die Mitarbeiter verfügen über ein hohes Maß an Eigenverantwortung im operativen Geschäft. Das stärkt ihre Identifikation mit dem Unternehmen, steigert die Motivation und fördert nicht zuletzt die Kundenorientierung. Denn sie stehen im direkten Kontakt mit den Kunden und kennen deren Bedürfnisse und die Rahmenbedingungen vor Ort aus erster Hand. (Metro GB 2010)

Die Auswertung der Aussagen legt nahe, dass als ›Identitätsfaktoren‹ ‚Marke‘, ‚Leitbild‘, ‚Mitarbeiterbeteiligung und -eigenverantwortung‘, ‚Mitarbeiterfeste/Tag der offenen Tür‘, sowie ‚verantwortliches/nachhaltiges Wirtschaften‘ genutzt werden. Als ›Identitätsziele‹ werden neben der ‚Identifikation‘ auch ‚Vertrauen‘, ‚konzernweite Zusammenarbeit‘, ‚Mitarbeitermotivation‘, ‚Kundenorientierung‘ und ‚Erfolg‘ aufgeführt. Gerade die letzten Ergebnisse deuten auf die Funktionalisierung von ›Unternehmensidentität‹ für ökonomische Ziele hin. Besonders ‚Erfolg‘ findet sich daher in häufiger Ausführung:

Uns ist immer beides wichtig: der Erfolg und die Menschen. Grundlage unseres Erfolgs ist die hohe Identifikation unserer Mitarbeiter mit dem Unternehmen, verbunden mit einem hohen Engagement, das wir durch umfangreiche Weiterbildungs- und Trainingsprogramme. (BDF Unser Profil)

Um valide Aussagen zur Konstruktion von UNTERNEHMENSIDENTITÄT zu treffen, muss jedoch auch das weitere Wortfeld zu ›Unternehmensidentität‹ untersucht werden (→ 7.1.1.2), das

---

<sup>9</sup> Das Substantiv *Identifizierung* verweist im präpositionalen Anschluss mit *von* auf DINGE (*Möglichkeiten, Win-Win-Konstellationen, Risiken*) und PERSONEN (*Potenzialträger, Risikopatienten*), was ebenfalls für die Analyse peripher ist.



(partielle) Synonyme enthält, die in metaphorischer bzw. metonymischer Relation zum Platzhalter *\*identität* stehen.

#### 1.1.4 *Person, Persönlichkeit, Charakter, Geist*

Der Ausdruck *Person* findet sich gehäuft in den Repräsentationstexten von HENKEL:

Einen Freund wünscht sich jeder Mensch [...]. Henkel wird durch diesen Vergleich zu einer konkreten Person, die ein Gesicht und etwas zu sagen hat, mit der man sich identifizieren und auseinander setzen kann. (Henkel Corporate Identity)

UNTERNEHMEN und MENSCHEN werden in diesem Beleg durch die Metapher *Person* als vergleichbar perspektiviert, was das Substantiv *Vergleich* lexikalisch unterstreicht und bereits unter den Metaphern erläutert wurde (→ 8.4.3). Die DEUTSCHE BANK dagegen rahmt den Ausdruck *Persönlichkeit* im Text *Leitbild und Marke* mittels der Adjektive *passioniert*, *präzise*, *selbstbewusst* und *offen*. Die dadurch konstituierten VERHALTENSEIGENSCHAFTEN werden in vier kurzen anaphorischen und parallel gehaltenen Sätzen erläutert:

Unsere Persönlichkeit

Wir sind: passioniert. Leistung ist unsere Leidenschaft. Auf dieser Leidenschaft beruht das Vertrauen, das Menschen in uns setzen. Dabei kommt es auf jeden Einzelnen an. Jeder macht einen Unterschied.

Wir sind: präzise. Wir sind – aus Deutschland heraus – ein weltweit agierendes Unternehmen. Damit stehen wir für Präzision und Qualität. Wir gehen den Dingen auf den Grund. Darum können wir Sachverhalte einfach und klar darstellen.

Wir sind: selbstbewusst. Meritokratische Kultur und Tradition prägen das Selbstvertrauen der Deutschen Bank.

Wir sind: offen für Neues. Zu unserem Verständnis von Leistung gehört es, Neuem gegenüber aufgeschlossen zu sein. (Deutsche Bank Leitbild und Marke)

Diese vier anaphorischen Sätze (*wir sind x*) setzen UNTERNEHMENSIDENTITÄT somit in einer klaren Ordnung durch die ›Identitätsteile‹ ‚offen‘, ‚selbstbewusst‘ etc. fest. Der Ausdruck *Charakter* wird dagegen fast ausschließlich in Kookkurrenz mit *Marke*<sup>10</sup> verwendet und der MARKE auch explizit zugeschrieben:

Ein Unternehmen, das den Charakter einer Marke besitzt, signalisiert dieses [Ruf als attraktiver Arbeitgeber, S.B.] auf Anhieb und gehört damit für Bewerber zu den ersten Adressen. (Henkel Corporate Identity)

Die meisten Belege in diesem Kapitel tauchen jedoch bei *\*geist* auf, indem dem UNTERNEHMEN (*Unternehmen, Konzern*) ein ›Geist‹ zugeschrieben wird:

Denn es ist nicht unsere Absicht, dass das Geschriebene ein Stück Papier bleibt, das rasch in Vergessenheit gerät. Vielmehr wünschen wir uns, dass es angenommen wird und nachhaltig den Geist und das Selbstverständnis in unserem Unternehmen prägt. (HeidelbergCement Corporate Mission)

Daneben offenbart sich das Kompositum *Unternehmergeist* mit Dominantsetzung von ›Identitätsart‹ ‚neu‘ (*neu\**) sowie ‚aus Geschichte abgeleitet‘ (im Kontext von *\*gründer\**):

Um die Entwicklung hin zu einer neuen, von *Unternehmergeist* geprägten METRO GROUP zu unterstützen, haben wir zudem eine effiziente, zielgerichtete Umsetzungsmethodik festgelegt. Jede Gesellschaft entwickelt

---

<sup>10</sup> Vgl. dazu auch die Zuschreibung von *Persönlichkeit* an MARKEN (→ dieser Anhang, 1.7.2). *Wesen* weist dagegen keine Belege im Korpus auf.

zunächst eigenständig Maßnahmen, die geeignet sind, die zentral vorgegebenen Ziele zu erreichen. (Metro GB 2010)

Der Unternehmergeist des Firmengründers Fritz Henkel hat das Unternehmen geprägt. [...] Die Bedeutung des Unternehmergeistes und der Verantwortung für die Zukunft, die sich aus der Geschichte ableitet, wird uns immer wieder von vielen innerhalb wie außerhalb des Unternehmens bestätigt. (Henkel GB 2010)

Die Lexeme *Person*, *Persönlichkeit*, *Charakter* und *\*geist* zeigen folglich anschaulich, wie UNTERNEHMEN anthropomorphisiert werden und ihnen dadurch Identität zugeschrieben wird. Auffällig ist dabei auch, dass alle vier Lexeme semantisch vage sind. Sie sind zwar alle positiv konnotiert, was sie aber jeweils genau bedeuten, wird nicht weiter ausgeführt.

### 1.1.5 *Selbst\**

Ein Lexemverband, der in den Texten hervorsticht, reiht sich um das stammbildende Morphem *\*selbst\** (465 Hits). Hierdurch wird ein reflexiver Rückbezug auf das SELBST als Referenzobjekt vorgenommen. Diese reflexive Funktion von *selbst* im Sinne eines Senderrückbezugs wird im folgenden Beleg von HENKEL mithilfe der SPIEGEL-Metaphorik entfaltet:

Jedes Unternehmen und jeder Mensch hat ein Gesicht, wir erkennen andere daran und – wenn wir in den Spiegel sehen – erkennen wir uns selbst darin wieder. (Henkel Corporate Identity)

Sehr viele Belege liefert auch das Adverb *selbst*.<sup>11</sup> *Selbst* steht innerhalb des Korpus meist im Kotext von Handlungsverben, d.h. Unternehmen stellen heraus, wie sie eigens handeln (>Identitätshandlung<). Die Unternehmen schaffen durch *selbst* nochmals eine Fokalisierung bestimmter HANDLUNGEN:

Wir vertrauen unseren Kollegen und verhalten uns selbst vertrauenswürdig. (E.ON Unsere Werte)

Oft wird *selbst* direkt mit Partizipien verknüpft, welche eine HANDLUNG in der Vergangenheit denotieren, etwa eine PRODUKTENTWICKLUNG des Unternehmens in der Vergangenheit:

Zur Produktion des so genannten grünen Wasserstoffs nutzt Linde den selbst entwickelten Pyroreforming-Prozess. (Linde GB 2010)

Die Logistikdrehzscheibe deckt beispielsweise einen Teil ihres Strombedarfs aus selbst erzeugter Windenergie und setzt bei der Kühlung und Außenbeleuchtung auf klimaschonende Technik. (Metro GB 2010)

Auch das Adjektiv *selbstständig\** wird fortwährend im Korpus genannt. Meist geht es dabei jedoch um die >unternehmerisch-rechtliche Form der Selbstständigkeit< von Konzerngruppen, Tochtergesellschaften oder Konzernmarken (im Kotext der Ausdrücke *Eigenständigkeit* und *Unabhängigkeit*).<sup>12</sup> Bei MERCK könnte es sich bei *selbstständig* dagegen auch um einen Selbstbezug handeln:

Unser Ziel ist die dauerhafte Geschäftsbeziehung, nicht nur der kurzfristige Erfolg. Auf dieser Grundlage handeln wir als selbstständiges Unternehmen ertragsorientiert. (Merck Leitbild)

---

<sup>11</sup> Allerdings wurden nur diejenigen Formen berücksichtigt, die sich auch auf die zu untersuchende Lesart, d.h. reflexiv auf das UNTERNEHMEN bezogen.

<sup>12</sup> Vgl. dazu: „Der Konzern präsentiert sich mit vier Unternehmensbereichen, die jeweils rechtlich selbstständig sind.“ (Fresenius GB 2010).



Versteht man diese Aussage als einen Selbstbezug, vermittelt diese den Eindruck, MERCK sei von der UMWELT (z.B. vom gesellschaftlichen Kontext) abgeschottet (vgl. Crijns 2011).<sup>13</sup>

Das Adjektiv *selbstbewusst* wurde weiter oben bereits von DEUTSCHE BANK als Füllung einer spezifischen ›Identitätsart‹ beschrieben. *Selbstbewusst* wird dabei in der Lesart ‚von sich selbst überzeugt‘ verwendet. Gleichzeitig offenbart *selbstbewusst* aber auch die Lesart ‚Bewusstheit des Selbst‘ (vgl. Duden 2001, 1437). Daher ist dieses Lexem durchaus erkenntnisleitend für die Analyse. Beide Lesarten werden im folgenden Beleg mit dem Substantiv *Selbstbewusstsein* aufgerufen:

Unser Logo spricht für sich selbst. Es steht für das Selbstbewusstsein der Bank. (Deutsche Bank Leitbild und Werte)<sup>14</sup>

Eine ‚Bewusstheit des Selbst‘ widerfährt einem UNTERNEHMEN als OBJEKT natürlicherweise nicht, wird hier aber als Lesart eröffnet (*Selbstbewusstsein der Bank*) und damit als ›Identitätszustand‹ suggeriert. Die meisten Belege innerhalb des Lexemverbandes *\*selbst\** weist jedoch das Substantiv *Selbstverständnis* auf:

Die Neuausrichtung hatte aber nicht nur organisatorische Konsequenzen, sondern schloss auch Fragen nach dem Unternehmenszweck und dem Selbstverständnis von Henkel ein. (Henkel Corporate Identity)

HENKEL nimmt dabei (wie DEUTSCHE BANK) eine Verknüpfung von *Selbstverständnis* mit dem Eigennamen (*von Henkel*) vor, während die meisten anderen Belege metonymisch die *wir*-Gruppe für das UNTERNEHMEN einsetzen:

Das kraftvolle und lebendige Gelb [der Marke, S.B.] ist energiegeladen und betont unser Selbstverständnis und unsere Leistungskraft. (Commerzbank Die Marke der neuen Commerzbank)

Auffallend ist ebenfalls, dass *Selbstverständnis* häufig in substantivischen n-Grammen kohäsiv (durch *und*, *auch* oder sequentiell) mit anderen Hochwertwörtern (s.o. bei *Identität*) verknüpft oder durch Attributionen ergänzt wird, die eine ‚Belebung‘ des UNTERNEHMENS denotieren (›Identitätsart‹ ‚belebt‘):

Pionier zu sein gehört für Siemens zum gelebten Selbstverständnis, es ist unsere Vision. (Siemens GB 2010/Siemens Vision)

Auch werden an *Selbstverständnis* mehrmalig rechtsseitig Präpositionalphrasen (*Selbstverständnis als X*) gebunden. Diese prädikativen Anschlüsse durch *als X* ermöglichen Unternehmen, eine ›Identitätsrolle‹ aus der Selbstperspektive zu definieren und zugleich die vorgenommene Klassifikation durch die *als*-Phrase als Sachverhalt festzusetzen (→ 8.2.2): Es findet sich dabei die ›Identitätsrolle‹ ‚ökonomisch orientiertes Unternehmen‘ (*Selbstverständnis*

---

<sup>13</sup> Vgl. Luhmann (1993, 31) zur Selbstreferentialität des autopoietischen Systems. Langenohl (2009, 256) spricht ebenfalls von „Reflexivität“ von Diskursen: „Sie sind hinsichtlich ihrer Performativität selbstbezüglich, weil ihre Wirkungen ständig zum Gegenstand der Debatte werden und Akteure mit Erwartungen konfrontiert werden, welche Signale sie zu setzen oder zu vermeiden haben.“ (Langenohl 2009, 256).

<sup>14</sup> Vgl. dazu auch: „Meritokratische Kultur und Tradition prägen das Selbstvertrauen der Deutschen Bank.“ (Deutsche Bank Leitbild und Werte).

als global operierendes Unternehmen, Selbstverständnis als leistungsorientiertes Unternehmen, Selbstverständnis als wachstumsorientiertes Unternehmen). Ebenfalls taucht die ›Identitätsrolle‹ ‚gesellschaftlich orientiertes Unternehmen‘ auf, wobei beide Attribute bereits dargelegt wurden. MERCK verknüpft diese kohäsiv:

Unser weltweit gültiges, 1991 formuliertes Leitbild definiert unser Selbstverständnis als erfolgreiches und verantwortungsbewusstes Unternehmen. (Merck Leitbild)

Auch weitere Belege weisen metareflektierend (z.B. *schließt [...] mit ein*) auf eine Synthese beider Attribute von ›Identitätsrolle‹ (‚ökonomisch orientiertes Unternehmen‘ und ‚gesellschaftlich orientiertes Unternehmen‘) hin:

Die Sicherung des dauerhaften wirtschaftlichen Erfolgs der METRO GROUP schließt nach unserem unternehmerischen Selbstverständnis die Übernahme von Verantwortung im gesellschaftlichen Raum und die Beachtung von Umweltbelangen ein. (Metro Corporate Principles)

Die Wahrnehmung gesellschaftlicher Verantwortung gehört für uns untrennbar zu unserem unternehmerischen Selbstverständnis. (BMW GB 2010)

Dass die ›Identitätsrolle‹ ‚ökonomisch orientiertes Unternehmen‘ bei METRO und BMW an erster Stelle genannt wird, lässt erahnen, dass sie nach der Sequenzierungsmaxime topischer Informationen als ‚wichtiger‘ gilt (vgl. Stockinger 1998, 20). Auch DAIMLER sequenziert in dieser Reihenfolge, geht jedoch sprachthematisierend<sup>15</sup> auf das Rollenkonzept (*Rolle als X*) ein und differenziert vierfach zwischen *Selbstverständnis als Arbeit- und Auftraggeber, Dienstleister, Automobilproduzent* sowie *Corporate Citizen*:

An all unseren Standorten steht unser Unternehmen in vielfältigen Wechselwirkungen zu seinem gesellschaftlichen Umfeld. Diese Beziehungen sind für uns Chance und Verpflichtung zugleich. Sie betreffen unsere Rolle als Arbeit- und Auftraggeber, Dienstleister und Automobilproduzent sowie in einem umfassenden Sinne unser Selbstverständnis als Corporate Citizen: Wir wollen Werte für alle Stakeholder schaffen. (Daimler GB 2010)

Der hierbei konstituierte CORPORATE CITIZEN ist dabei die Personifizierung des UNTERNEHMENS als BÜRGER (→ dieser Anhang, 1.8.3). Bewegt man sich von der Syntagmen- auf die Satzebene, explizieren auch *zu*-Infinitivsätze, was als *Selbstverständnis* gilt, wobei die meisten Befunde diesbezüglich das Attribut ‚gesellschaftlich orientiertes Unternehmen‘ dominant setzen:

Als führender Anbieter von medizinischen Gasen ist es das Selbstverständnis von Linde, im Rahmen seines gesellschaftlichen Engagements auch medizinische Projekte zu unterstützen. (Linde GB 2010)<sup>16</sup>

Auch ein weiteres Attribut (‚nachhaltig orientiertes Unternehmen‘) tritt im Rahmen von Konstruktionsmetaphern im Kontext von *nachhaltig\** dominant auf:

Nachhaltiges Wirtschaften war schon immer Teil unseres Selbstverständnisses bei Henkel. (Henkel GB 2010)

---

<sup>15</sup> Über metasprachliche Reflexion kann Identitätsorganisation stattfinden, denn das Unternehmen „reflektiert mit dem kunstvollen Selbstbezug über sein eigenes Image“ (Crijns 2011).

<sup>16</sup> Vgl. dazu auch: „Mit ihrem Kundenversprechen ‚Versichern heißt verstehen‘ hebt ERGO sich von den Wettbewerbern ab; es steht für das Selbstverständnis und das Ziel, sich konsequent an den Bedürfnissen der Menschen auszurichten.“ (Munich Re GB 2010).

Der Selbstverständnisbegriff scheint so prominent im Diskurs, dass sich *Selbstverständnis* auch auf der Textebene als Teilüberschrift wiederfindet. Darauf folgen zwei bis drei Sätze, die den Ausdruck *Selbstverständnis* präzisieren:<sup>17</sup>

Unser Selbstverständnis. „Die BASF ist das weltweit führende Chemieunternehmen. Wir bieten intelligente Lösungen mit innovativen Produkten und maßgeschneiderte Dienstleistungen. Wir eröffnen Erfolgchancen durch vertrauensvolle und verlässliche Partnerschaft.“ (BASF Vision.Grundwerte.Leitlinien)

Unser Selbstverständnis: K+S gehört weltweit zur Spitzengruppe der Anbieter von Standard- und Spezialdüngemitteln; im Salzgeschäft sind wir mit Standorten in Europa sowie Nord- und Südamerika der führende Hersteller in der Welt. (K+S GB 2010)

Das Lexem *Selbstverständnis* trägt damit in vielfältiger Weise zur Bedeutungserschließung des Konzeptes ›Unternehmensidentität‹ bei. Erst auf den zweiten Blick dagegen scheint das Lexem *selbstverständlich*\* von Interesse. Dennoch zeigen Dinge, die für *selbstverständlich* gehalten werden, den Sinn- und Geltungsrahmen von Individuen an bzw. das, was in Aussagen als gemeinsames Wissen präsupponiert wird (*X ist selbstverständlich für Y*) (→ 8.2.4.2). Dieses gemeinsame Wissen ist essentieller Teil jeder konstruierten UNTERNEHMENSIDENTITÄT. In den Repräsentationstexten wird dieses Wissen von den Unternehmen sprachlich häufig durch *für uns* im Kontext von *selbstverständlich*\* angezeigt (›Identitätsvorwissen‹). Als ›Identitätsvorwissen‹ tauchen unter anderem ‚Mitarbeiterwertschätzung‘ und ‚Kundenwertschätzung‘ auf:

Die ständige Weiterbildung und die Verbesserung des vorhandenen Wissens aller Mitarbeiterinnen und Mitarbeiter sind für Beiersdorf eine Selbstverständlichkeit. (BDF GB 2010)

Wir bemühen uns konsequent um ein besseres Verständnis der Kundenbedürfnisse und -wünsche, sagt Thomas Bischof. „Erst auf dieser Grundlage gestalten wir die entsprechenden Produkte.“ Das klingt eigentlich selbstverständlich, ist aber, wenn man um die Erfahrungen der Verbraucher weiß, kaum weniger als eine Revolution. (Munich Re GB 2010)

Im letzten Beleg wertet MUNICH RE ‚Kundenwertschätzung‘ durch die Einschränkung mittels *eigentlich* zudem als *Revolution* auf. Es wird suggeriert, das *eigentlich* Selbstverständliche sei gar nicht *selbstverständlich* und nur MUNICH RE praktiziere dieses, was man eigentlich als *selbstverständlich* annehmen sollte. So kann sich MUNICH RE abgrenzen und seiner UNTERNEHMENSIDENTITÄT einen spezifischen Bedeutungsanteil (*Verständnis der Kundenbedürfnisse und -wünsche*) hinzufügen. Als weitere Attribute tauchen im Korpus ‚(rechtliche) Prinzipieneinhaltung/-transparenz‘, ‚Umweltschutz und Sicherheit‘ und ‚Engagement‘ auf:

Es ist für uns selbstverständlich, sämtliche Produkte auf mögliche Risiken für Gesundheit, Sicherheit, Umwelt und Qualität zu überprüfen und dafür zu sorgen, dass sie bei verantwortungsvoller und sachgerechter Nutzung sicher für Mensch und Umwelt sind. (K+S GB 2010)

Engagement ist für uns selbstverständlich. Wir hören unseren Kunden zu und erfüllen ihre Anforderungen. (MAN Unternehmensleitbild)

---

<sup>17</sup> Weitere Belege zeigen auch eine Verbindung mit dem Verb *sich verstehen* und schaffen somit den reflexiven Rückbezug zu *Selbstverständnis*: „Munich Re versteht sich deshalb heute mehr denn je als Service-rückversicherer und bietet Produkte, Lösungen und Dienstleistungen an [...].“ (Munich Re Strategie).

Alle genannten Fügungen lösen bei Rezipienten somit eine konversationelle Implikatur aus (>für X ist Y selbstverständlich, aber für Wettbewerber nicht<), wodurch eine klare Abgrenzung der eigenen UNTERNEHMENSIDENTITÄT entsteht.<sup>18</sup>

Eine besondere Stellung hat in diesem Kapitel schließlich der Ausdruck *Selbstverpflichtung*, denn dieser dient inzwischen fachterminologisch als Bezeichnung von SELBSTVERPFLICHTUNGEN von Unternehmen zur Einhaltung bestimmter Regeln, die auf freiwilliger Basis beruhen und daher rechtlich nicht bindend sind bzw. die Haftbarmachung für solche Aussagen bisher eine rechtliche Grauzone darstellt (vgl. Frenz 2001, 13ff, 85ff.):<sup>19</sup>

Im März 2010 haben wir unsere Selbstverpflichtung im Rahmen der „Europäischen Charta für die Straßenverkehrssicherheit“ erneuert und damit unser Engagement in diesem Bereich bekräftigt. (Deutsche Post GB 2010)

Durch den Ausdruck *Selbstverpflichtung* erscheint die DEUTSCHE POST als pflichtbewusstes Unternehmen in der Gesellschaft; zudem wurde die PFLICHT selbst von DEUTSCHE POST eingeleitet, was das Possessivpronomen *unsere* markiert. In weiteren Belegen finden sich darüber häufig prädikative Anschlüsse (*Selbstverpflichtung zu X*), welche konkrete >Identitätspflichten< evozieren:

Selbstverpflichtung zu verantwortlichem Handeln. Am 25. November 2010 haben Top-Manager und Unternehmer von 21 deutschen Unternehmen in Berlin ein »Leitbild für verantwortliches Handeln in der Wirtschaft« unterzeichnet. (Daimler GB 2010)

Grundlage dieser Partnerschaft ist das „Changemaker Manifest“ der Utopia-Stiftung: eine Selbstverpflichtung zur Nachhaltigkeit in zehn Punkten. (Telekom GB 2010)

Wie diese Aussagen zeigen, wird neben den >Identitätspflichten< (z.B. ‚Nachhaltigkeit‘) auch auf konkrete Prätexte (z.B. »Leitbild für verantwortliches Handeln in der Wirtschaft«) verwiesen (→ 7.3.1.1), die somit die Glaubwürdigkeit der unternehmerischen Aussagen von außen erhöhen. In den meisten Fällen wird *Selbstverpflichtung* jedoch nicht spezifiziert, sondern im Plural verwendet und durch *unsere* attribuiert:

Nachhaltigkeit ist eine Querschnittsaufgabe für das gesamte Unternehmen. Dazu gehört, dass wir einen offenen Dialog mit unseren Stakeholdern pflegen, wichtige Themen rechtzeitig erkennen sowie unsere Selbstverpflichtungen weltweit umsetzen und überprüfen. (BASF GB 2010)

Es scheint in diesem Beleg nur wichtig, dass BASF eine SELBSTVERPFLICHTUNG besitzt und diese umgesetzt werden soll (>Identitätshandlung< ‚Identitätsumsetzung‘); deren Inhalt wird als bekannt vorausgesetzt. K+S agiert dagegen transparenter (→ Abb. 83):

---

<sup>18</sup> Wenige Belege fanden sich mit vorangestellter Negation (*X ist nicht selbstverständlich*). Vgl. dazu auch das Kapitel → 8.2.4.2 Geltungsanspruch ohne Einschränkungen – Modalität.

<sup>19</sup> *Selbstverpflichtung* taucht häufig in der *Corporate Governance* (→ 5.2.2.6) oder dem *Code of Conduct* auf. Jedoch wird der Selbstverpflichtungsbegriff als Bekenntnis zur unternehmerischen Verantwortung immer häufiger herausgegriffen und in weitere programmatische Texte, etwa in das *Leitbild*, integriert. Da eine *Selbstverpflichtung* rechtlich nicht obligatorisch ist, wird der Verweis auf diese vornehmlich der Ausdrucksfunktion dienlich – denn es wird Aussagen durch die politische Semantik ein bindender institutioneller und konstitutioneller Charakter verliehen (vgl. Schewe 2009).

| SELBSTVERPFLICHTUNG DER<br>KALIINDUSTRIE (BASISJAHR 1990) |                                                                                                                                         | TAB: 5.3.1 |
|-----------------------------------------------------------|-----------------------------------------------------------------------------------------------------------------------------------------|------------|
| Spezifisches Ziel                                         |                                                                                                                                         |            |
| Bis 2005                                                  | Verringerung der spezifischen CO <sub>2</sub> -Emissionen um 66 % auf 31 kg CO <sub>2</sub> /t Rohsalzverarbeitung (Ziel 1996 erreicht) |            |
| Bis 2012                                                  | Verringerung der spezifischen CO <sub>2</sub> -Emissionen um 69 % auf 28 kg CO <sub>2</sub> /t Rohsalzverarbeitung                      |            |

Abbildung 83 - K+S GB 2010

Unter der Überschrift *Selbstverpflichtung der Kaliindustrie* erscheinen JAHRESZAHL und BEISPIELE für Umsetzungen tabellarisch. Interessant sind in diesem Hinblick auch die linksseitigen Anschlüsse von *Selbstverpflichtung*\* durch Substantivierungen wie *Einhalten* oder *Einhaltung*:

Arbeits- und Sozialstandards [...] – Einhalten der Selbstverpflichtung wird durch globales Monitoringsystem überprüft. (BASF GB 2010)

Syntagmen wie *Einhalten der Selbstverpflichtung* erhöhen die Faktizität der Aussage in Bezug auf die suggerierten ›Identitätspflichten‹. Dieser Funktion dient auch die folgende Aussage, wodurch BAYER durch *interne[n]* zur *Selbst*-Bezugsinstanz wird:

Hierbei berichten wir gemäß unserer internen Selbstverpflichtung bereits geringe Produktaustritte: bei Stoffen mit einem hohen Gefährdungspotential. (Bayer GB 2010)

Das Konzept ›Identitätspflichten‹ wird im Diskurs auch weiter ausgebaut, indem lexikalische Varianten (mit dem Stammmorphem *\*pflicht\**) genutzt und in dieser Arbeit unter dem Sachverhalt VERPFLICHTUNG (→ dieser Anhang, 1.5.5) diskutiert werden.

### 1.1.6 Profil und Porträt

Durch ihre Häufigkeit und den Gebrauch auf Textsortenebene fallen im Korpus die Ausdrücke *\*profil* (130x) und *Porträt/Portrait* auf. Beide Ausdrücke verweisen auf die „Gesamtheit von [positiven] Eigenschaften, die unverwechselbar typisch für jemanden oder etwas sind“ (Duden 2001, 1243). *Profil* wird in den Belegen oft ein Attribut vorangestellt (*klar\**):<sup>20</sup>

Die Deutsche Bank hat ein klares Profil: Sie steht für Leistung – im Geschäft und darüber hinaus. (Deutsche Bank Leitbild und Werte)

Hierdurch wird die ›Identitätsart‹ (,eindeutig‘) fokussiert. In einer semantischen Verbindung zu *klar* steht das Adjektiv *unverwechselbar\**, durch welches jedoch stärker die Abhebung von anderen Unternehmen betont wird (,alleinstellend‘):

Wir werden Linde zu einem exzellenten Unternehmen mit einem unverwechselbaren Profil entwickeln, zu einem in jeder Hinsicht führenden und vorbildlichen Unternehmen. (Linde GB 2010)

Weitere Bedeutungsnuancen lassen sich durch die folgenden Attribuierungen ableiten (,verbessert‘, ,international‘):

<sup>20</sup> Vgl. dazu auch *Profil* in Bezug auf MARKE und PRODUKTE: „[...] drei Golfmarken mit klarem Profil unter einem Dach: TaylorMade, adidas Golf und As.“ (Adidas GB 2010).

Der Wettbewerb um die besten Fach- und Führungskräfte verstärkt sich weltweit. Dieser Entwicklung begegnen wir mit einem verbesserten Profil als globaler Arbeitgeber: [...] (BASF GB 2010)

Gelebte kulturelle Offenheit, Toleranz und Respekt nach innen und nach außen prägen unser internationales Profil. (Metro Corporate Principles)

Eine regelhafte Verknüpfung zeigt sich darüber zwischen dem Syntagma *Profil als X* und *Arbeitgeber*, wodurch eine spezifische ›Identitätsrolle‹ (,Arbeitgeber‘) aus der Sicht von Anspruchsgruppen evoziert wird. Auf der Satzebene wird *Profil* fortwährend mit dem Verb *schärfen* verbunden, was auf die ›Identitätshandlung‹ ,Identitätsschärfung‘ zurückverweist:

Mit ComWerte schärft die Commerzbank also auch ihr Profil im Bankenmarkt [...]. (Commerzbank Die Werte der Commerzbank)

*Profil* wird auf Makroebene ebenso in Überschriften genutzt (BEIERSDORF *Unser Profil: Globale Marken, globaler Erfolg*) und auf Textsortenebene (→ 5.2.2.7) fixiert, wobei textuell oftmals Verknüpfungen zu strategischen Konzepten (›Leistung‹, ›Erfolg‹, ›Führung‹) vorgenommen werden. Das Lexem *Porträt* dagegen findet sich hauptsächlich als Teilüberschrift (z.B. MAN *Porträt* im MAN *Unternehmensleitbild*). FRESENIUS dient der Ausdruck jedoch als konkreter Verweis auf die bildliche Darstellung seiner KLINIKEN:

In einer Mediathek stellen wir auf der HELIOS-Website zahlreiche digitale Informationen für die Öffentlichkeit bereit: Informationsfilme für Patienten, Mitarbeiterinterviews und Videos mit Porträts unserer Kliniken. (Fresenius GB 2010)

Diese bei FRESENIUS zugrunde liegende Konzeptualisierung von ›Identitätsabbild‹ wird im folgenden Kapitel durch die Ausdrücke *Bild* und *Image* noch stärker aufgenommen.

### 1.1.7 *Bild und Image*

Das Substantiv *Bild* wird im Diskurs kaum linksseitig attribuiert. Dadurch kann angenommen werden, dass das ›Identitätsabbild‹ nicht spezifiziert werden muss, d.h. es wird als bekannt und bewusst vorausgesetzt. Rechtsseitig werden Eigennamen oder das Substantiv *Unternehmen* als Genitivattribut angeschlossen:

Wir alle sind Botschafter unseres Unternehmens und prägen durch unser Handeln das Bild der BASF. (BASF We create chemistry)

Für alle Mitarbeiter ist es [...] notwendig, die für sie relevanten Rechtspflichten zu kennen und einzuhalten. Dieses prägt das Bild der BMW Group in der Öffentlichkeit und schafft Vertrauen in ihre Produkte und Marken. (BMW Verhaltenskodex).

Für Bayer hat die Kommunikation einen hohen Stellenwert. Sie ist Anliegen und Verpflichtung gleichermaßen, denn sie prägt das Bild des Unternehmens in der Öffentlichkeit. (Bayer Namen.Zahlen. Fakten 2010/2011)

Auffallend ist in allen Belegen, dass in der Verbhandlung seriell das Verb *prägen* eingesetzt wird (›Identitätshandlung‹ ,Identitätsprägung‘), d.h. es wird präsupponiert, dass Unternehmen ihr BILD beeinflussen können, etwa durch HANDELN oder KOMMUNIKATION.<sup>21</sup> Zweitens wird

---

<sup>21</sup> Vgl. dazu das *Impression Management* im Kapitel Sprachhandlungsebene (→ 8).



*Bild* durch das Lokaladverbial *in der Öffentlichkeit* lokalisiert, was auf das Konzept ›Identitätslokalisierung‹ ‚außen‘ bei der Verwendung von *Bild* schließen lässt. Diesen Eindruck bestätigen weitere Aussagen:

So ist es infolge der täglichen Informationsflut, der Dynamik des internationalen Wettbewerbs und der kaum überschaubaren Zahl von Marktteilnehmern selbst für große Unternehmen immer schwerer, in der Öffentlichkeit wahrgenommen zu werden und ein klares Bild von sich zu vermitteln. (Henkel Corporate Identity)

In diesem Beleg von HENKEL präsentiert sich ebenfalls das Konzept ›Identitätshandlung‹ (›Identitätsvermittlung‹). ›Identitätsvermittlung‹ wird auch in anderen Beispielen, die den Ausdruck *Bild* enthalten, dominant gesetzt:

Im Konzernlagebericht sind Geschäftsverlauf und die Lage des Konzerns so darzustellen, dass ein den tatsächlichen Verhältnissen entsprechendes Bild vermittelt wird. Dabei ist auch auf die Risiken der künftigen Entwicklung einzugehen. (BDF GB 2010)

In diesem Beleg wird nicht nur ausgesagt, dass ein BILD ‚vermittelt‘ werden kann, sondern auch, dass das BILD nicht *tatsächlichen Verhältnissen* entspricht (›Identitätsart‹ ‚konstruiert‘).<sup>22</sup> Anstatt *Bild* wird auch das englische Wort *Image* gebraucht;<sup>23</sup> als Bezugsobjekte von *Image* gilt meist das UNTERNEHMEN, aber auch die MARKE:

Das individuelle, unverwechselbare Image jeder einzelnen Marke haben wir im abgelaufenen Geschäftsjahr weiter geschärft. (VW GB 2010)

Wie die Aussage von VW veranschaulicht, wird *Image* dominant linksseitig mit *individuell\**, *unverwechselbar\** oder *gut\** attribuiert, wobei diese Adjektive erneut das Konzept ›Identitätsart‹ mit unterschiedlichen Füllungen (u.a. ‚gut‘) evozieren. METRO formuliert im Folgenden unter besonders hohem Absolutheitsanspruch, das *beste Image* aufzuweisen:

Real hat den Anspruch, hier deutschlandweit das beste Image aufzubauen. (Metro GB 2010)

In den Belegen, in denen ein ‚gutes‘ IMAGE präsupponiert wird, tauchen auch häufig Sprachhandlungen der Sachverhaltsverknüpfung durch Kausalitätsbezüge (*damit*, *um*) auf:

Damit dieses positive Image erhalten bleibt, entwickeln wir die Beiersdorf Markenfamilien kontinuierlich weiter. (BDF Imagebroschüre)

Um das gute Image von Daimler zu wahren, ist die Verhaltensrichtlinie nicht nur während der Arbeitszeit, sondern auch bei außerdienstlichen Aktivitäten einzuhalten [...]. (Daimler Verhaltensrichtlinien)

---

<sup>22</sup> Vgl. dazu auch im Zuge der visuellen Metaphorik: „Wie wir uns sehen und sehen lassen.“ (Commerzbank Die Marke der neuen Commerzbank). Diese verweist auf ein bereits vor der Rezeption fixiertes BILD, das von ‚innen‘ und ‚außen‘ identisch ist. Diese Dichotomie ist auch im axiomatischen Schema ›intern und extern‹ (→ 6.2.5.6) sowie auf im betriebswirtschaftlichen CI-Konzept (→ 2.2.4) zu erkennen.

<sup>23</sup> Dieser Befund liegt auch teilweise an der Zweisprachigkeit von Texten, z.B. bei HEIDELBERGCEMENT und HENKEL: HEIDELBERGCEMENT übersetzt in seiner zweisprachigen *Corporate Mission* durchgehend *Selbstverständnis* mit *Corporate Image*. Auch bei HENKEL (*Corporate Identity*) wird *Selbstverständnis* viermal in der Übersetzung zu *Self-Image*, was durchaus im Hinblick auf die Semantik fraglich ist. ADIDAS verwendet *Identität* und *Image* gemeinsam, sodass hier eine semantische Differenzierung unterstellt werden kann: „Adidas und Reebok verfügen jeweils über eine eigene Identität und Tradition, über eigene Technologien und Designs sowie ein eigenes Image.“ (Adidas GB 2010).

Diese konsekutiven bzw. finalen Konnektoren suggerieren, dass bestimmte FAKTOREN konstant gehalten werden müssen, damit das *gute Image* (ZIEL) *erhalten* bleibt. Die Prädikation durch die Verben *erhalten* sowie *wahren* unterstützten tiefensemantisch auch die Vorstellung einer ›Identitätskonservierung‹. Komposita wie *Image-Pflege*, *Image-Ranglisten* sowie *Image-Film* enthalten ebenso das semantische Merkmal der ‚Konservierung‘. Gleichzeitig ruft *Image-Pflege* im folgenden Beleg durch den Kotext (*nur*) auch das Merkmal ‚konstruiert‘ auf:

EMPFINDEN SIE DIE UNTERSTÜTZUNG DES PROJEKTS DURCH DEN ADIDAS KONZERN ALS AUFRICHTIG ODER DIENT DAS PROJEKT NUR ALS IMAGE-PFLEGE? (Adidas GB 2010)

Da diese Aussage im *Geschäftsbericht* von ADIDAS erscheint, könnte man unterstellen, dass sie unter der Strategie des *Gatekeeping* eingesetzt wird (→ 8.4.2.3). Im folgenden Beispiel nutzt HENKEL das Kompositum *Image-Ranglisten*<sup>24</sup> und fügt damit durch *\*Ranglisten* das Attribut ‚kompetitiv‘ hinzu:

Wie erfolgreich dieser Weg begangen wird, belegen die Spitzenplätze in Image-Ranglisten und der steigende Unternehmenswert von Henkel in den letzten Jahren. (Henkel Corporate Identity)

Lexikalisch variiert wird *Image* letztlich auch durch (*positive*) *Wahrnehmung*, wodurch der visuelle Aspekt abgeschwächt aufgenommen wird (›Identitätsabbild‹):

Wir ermutigen unsere Mitarbeiter, öffentliche Ämter und Aufgaben zu übernehmen. Dieses trägt zu einer positiven Wahrnehmung des Unternehmens und seiner Repräsentanten in der Öffentlichkeit bei. Durch ein solches Engagement können die Interessen des Unternehmens auch im außerparlamentarischen Raum in angemessener Weise zur Geltung gebracht werden. (Metro Corporate Principles)

Diese Aussage von METRO scheint durchaus fraglich, da ein mögliches Ehrenamt der MITARBEITER um des positiven IMAGES willen funktionalisiert wird (vgl. ›Identität als Instrument/ Mittel für ein höheres Ziel‹). In semantischer Nähe zu *Bild*, *Image* und *Wahrnehmung* stehen schließlich auch *Ruf* und *Reputation*, die im folgenden Kapitel behandelt werden.

### 1.1.8 *Ruf und Reputation*

Das Substantiv *Ruf* wird meist mit *gut\** attribuiert und damit zugleich als ‚gut‘ positiv evaluiert:

Als internationaler Konzern mit gutem Ruf und anerkannter Kompetenz gilt ThyssenKrupp als attraktiver Arbeitgeber, so dass wir nach wie vor offene Ausbildungsstellen mit qualifizierten Bewerbern erfolgreich besetzen können. (ThyssenKrupp GB 2010)

Wie das Beispiel veranschaulicht, wird durch solche Fügungen (*mit gutem Ruf*) der unmittelbar dahinterstehende Sachverhalt (internationaler KONZERN mit gutem RUF) als festgesetzt konstituiert. In lexikalischer Variation (*gute\* Name*) geschieht dies auch im Folgenden:

Merck ist gleichzeitig der „gute Name“ der Unternehmerfamilie, die deshalb auch die unternehmerischen Prinzipien der Führung festlegt. (Merck Einzigartig – Der Merck Weg)

---

<sup>24</sup> *Image-Ranglisten* oder *Image-Messungen* beziehen sich auf die betriebswirtschaftliche Vorstellung eines kontinuierlichen *Monitoring* des Meinungsbildes durch „Meinungsmärkte“, z.B. mittels Medienresonanz, Fachmedien, Feedbacksystemen wie Kunden-/Mitarbeiterbefragungen, Berichten von Niederlassungsleitern oder Vertriebsleitern, impliziten Rückmeldungen durch Verkäufe etc. (vgl. Pfannenberger 2001, 23).

Auffallend ist in den Belegen jedoch, dass der RUF dabei nicht (wie IMAGE) als ‚konstruiert‘, sondern als ‚erworben‘ eingeführt wird, was die Verben *erwerben* oder *erarbeiten* im Kontext ausdrücken:

Siemens hat sich bereits in der Vergangenheit den Ruf großer Kundennähe erarbeitet. Die meisten unserer Kunden sind Organisationen kleiner und mittlerer Größe. Sie direkt und vor Ort zu betreuen ist uns eine Verpflichtung. (Siemens GB 2010)

DAIMLER präsupponiert zudem den enormen Aufwand, der für den einen ‚guten‘ RUF betrieben werden muss(te):

„Kein Geschäftsabschluss der Welt ist es wert, dafür den Ruf unseres Unternehmens aufs Spiel zu setzen.“  
Dr. Dieter Zetsche, Vorstandsvorsitzender der Daimler AG und Leiter Mercedes-Benz Cars. (Daimler Das Unternehmen 2011)

Durch die rechtsseitigen Genitivattribute, mit denen *Ruf* musterhaft attribuiert wird, lässt sich zugleich das Konzept ›Identitätsrolle‹ bedienen (*Ruf eines verlässlichen und vertrauenswürdigen Partners, Ruf großer Kundennähe, Ruf eines sehr innovativen und besonders familienfreundlichen Unternehmens, Ruf als attraktiver Arbeitgeber*). *Ruf* wird dabei vielfach, ähnlich wie *Profil*, mit dem Attribut ‚Arbeitgeber‘ in Verbindung gebracht:

Voraussetzung dafür ist ein Ruf als attraktiver Arbeitgeber, der sowohl interessante Karriere- und Zukunftsperspektiven bietet als auch durch sein soziales und gesellschaftliches Engagement anerkannt ist. Ein Unternehmen, das den Charakter einer Marke besitzt, signalisiert dieses auf Anhieb und gehört damit für Bewerber zu den ersten Adressen. (Henkel Corporate Identity)

Dieser Beleg von HENKEL macht wiederholt auf die Dichotomie ‚innen‘/‚außen‘ (›Identitätsart‹) aufmerksam, was DAIMLER durch das Syntagma *Ruf nach außen* aufgreift:

Alle Mitarbeiter, insbesondere Führungskräfte, sind sich bewusst, dass sie durch ihr Verhalten auch das Unternehmen repräsentieren und damit dessen Ruf nach außen und die Kultur nach innen prägen. (Daimler Verhaltensrichtlinien)

Synonym zu *Ruf* verwendet besonders RWE den Ausdruck *Reputation* und schreibt diesem daher eine zentrale Stellung in der Konstruktion der eigenen UNTERNEHMENSIDENTITÄT zu, was sich auch durch die Kopplung mit den Adjektiven *unsere\**, *hoch* bzw. *höchste\** offenbart:

Konkrete Auswirkungen unseres Engagements auf unsere Reputation erwarten wir erst mittel- bis langfristig. 2010 wurde uns im Vergleich zu unseren großen Wettbewerbern die höchste Reputation bescheinigt. (RWE Unsere Verantwortung 2010)

Weiterhin finden sich im Korpus regelhaft Verbindungen von *Reputation* mit dem Verb *stärken* (›Identitätshandlung‹ ‚Identitätsstärkung‘):

Dass sich das Unternehmen und seine Marken auf die zentralen Herausforderungen konzentrieren, ist eine wichtige Grundlage für die glaubwürdige Umsetzung unserer Nachhaltigkeitsstrategie im Markt. So stärken wir sowohl unsere Marken als auch die Reputation unseres Unternehmens sowie weltweit unsere Marktpositionen. (Henkel GB 2010)

In dieser Aussage manifestiert sich erneut das Attribut ‚außen‘ (*im Markt*) in Bezug auf den Ausdruck *Reputation*, wodurch eine klare ›Identitätslokalisierung‹ vorgenommen wird. Im folgenden Beleg wird das Konzept ›Identitätslokalisierung‹ ‚außen‘ durch das Substantiv *Öffentlichkeit* nochmals explizit sprachlich aufgenommen:

Einmal im Jahr lassen wir von einem Meinungsforschungsinstitut erheben, wie die Öffentlichkeit RWE im Vergleich zu unseren großen Wettbewerbern wahrnimmt. 2010 wurde uns die höchste Reputation bescheinigt. Diese Position wollen wir halten. (RWE GB 2010)

Ähnlich wie bei *Image-Messung* wird in dieser Aussage von RWE ebenso das Merkmal ‚kompetitiv‘ durch den Ausdruck *Wettbewerbern* mitaufgerufen. RWE versucht zudem, seine REPUTATION durch die Nutzung des Passivs zu objektivieren (*wurde uns [...] bescheinigt*), indem diese dem UNTERNEHMEN von ‚außen‘ zugesprochen wurde. Dass REPUTATION viel Aufwand erfordert (s.o. *Image-Pflege*) und deshalb ‚konserviert‘ (>Identitätskonservierung<) werden muss, präsupponiert RWE zusätzlich durch Aussagen zu >Identitätsrisiken<:

Durch systematisches Lieferantenmanagement wollen wir sicherstellen, dass unsere Geschäftsbeziehungen mit externen Partnern im Einklang mit unserem konzernweit gültigen Verhaltenskodex stehen. [...] Wir begegnen damit dem Risiko, dass das Fehlverhalten anderer Unternehmen auf unsere eigene Reputation abfärbt. Bei Zulieferern von Anlagen und komplexen Komponenten sind Verstöße gegen den Global Compact. (RWE GB 2010)

Auffallend ist hierbei allerdings, dass die RISIKEN, die RWE befürchtet, ‚außen‘ lokalisiert werden (*auf unsere eigene Reputation abfärbt*) und RWE sich als abzuschließendes System konzeptualisiert (>Identitätssicherung<).

### 1.1.9 Fazit: UNTERNEHMENSIDENTITÄT

Zum Abschluss dieses Kapitels müssen alle Ausdrücke des Wortfeldes und die damit aufgerufenen Konzepte bzw. konstituierten Sachverhalte gemeinsam betrachtet werden, um serielle Konzeptualisierungen aufzuspüren. Es zeigte sich, dass der Sachverhalt UNTERNEHMENSIDENTITÄT wenig über das Morphem *\*ident\** direkt versprachlicht wird, sondern vielmehr ein Wortfeld gebraucht wird, dessen Ausdrücke in ihrer Verwendung vielfach synonym gebraucht werden. Besonders der sich um das stammbildende Morphem *selbst\** reihende Lexemverband scheint dem Ausdruck von >Unternehmensidentität< in Repräsentationstexten zu dienen. Man könnte daher unterstellen, dass die untersuchten Unternehmen die Selbstperspektive dominant setzen:<sup>25</sup> *Selbst\** weist reflexiv zurück auf das UNTERNEHMEN (oder eine metonymische *wir*-Gruppe), was auch die Begriffsbesetzungen mit Rückbezug auf das UNTERNEHMEN bestätigten, z.B. *Henkel Identity* oder *Heidelberger Selbstverständnis*. Dagegen perspektivierten die Ausdrücke *Bild*, *Image*, *Ruf* und *Reputation* den Sachverhalt UNTERNEHMENSIDENTITÄT als stärker von ‚außen‘ wahrgenommenes Konstrukt, das in seiner Rezeption ‚gesteuert‘ werden kann. Die Dichotomie Selbstbild vs. Fremdbild scheint daher ein binäres Kriterium zu sein, durch welches die Ausdrücke im Wortfeld voneinander abgegrenzt werden. Des Weiteren offenbarte die häufig vorgenommene attributive Zuschreibung der Ausdrücke des Wortfeldes

---

<sup>25</sup> Diese *Selbst*-Perspektive findet Bestätigung durch die seriellen Pronominalstrukturen mit *wir/unser\** sowie die musterhafte Anthropomorphisierung UNTERNEHMEN als MENSCH (dadurch kann dem UNTERNEHMEN ein SELBST zugeschrieben werden) (→ 8.4.3.3).

das Konzept ›Identitätsart‹ ‚besitzanzeigend‘, ‚alleinstellend‘ und ‚einheitlich‘. Die zahlreichen Belege bei *Image*, *Ruf* und *Reputation* für das Konzeptattribut ‚gut‘ unterstrichen zudem die enorme Bedeutung eines als ‚gut‘ bewerteten Fremdbildes für Unternehmen.<sup>26</sup> Musterhafte Syntagmen, die sich im Kontext des gesamten Wortfeldes fanden, waren *Ausdruck unserer/der/von X* sowie *Teil unserer/der + X*, welche das Konzept ›Identitätsteile‹ aufrufen.<sup>27</sup>

Die Betrachtung der Satzebene schaffte eine Erweiterung der Perspektive. Dabei fielen im Kontext des Wortfeldes regelhaft die Verben *sein*, *(weiter-)entwickeln*, *gestalten*, *bewahren*, *erhalten*, *haben*, *besitzen*, *prägen*, *stehen für*<sup>28</sup> und *geben* auf. Betrachtet man den semantischen Gehalt der Verben, zeigte sich, dass es einerseits um Aktionsverben geht, welche die ›Identitätshandlung‹ ‚dynamisch‘ evozieren. Andererseits sind es Verben wie *sein*, *haben*, *besitzen*, *verfügen über*, die einen Besitz anzeigen, und daher (wie die beständigen Possessivpronomen) das Merkmal ‚besitzanzeigend‘ evozieren. Schließlich rufen konservierende Verben (*bewahren*, *erhalten*) daneben die ›Identitätshandlung‹ ‚statisch‘ auf. Diese Fixierung des Status quo war vor allem auffällig bei *Image*, *Ruf* und *Reputation*, d.h. es wird präsupponiert, dass ein ‚gutes‘ IMAGE bestehen bleiben soll. Die Verben wurden ferner unter valenztheoretischen Gesichtspunkten überprüft, wobei sich der Blick auf ihr inhärentes Perspektivierungspotential (Subjekt- und Objektreferenten) richtete. Daraus wurden ›Identitätssubjekte‹ (‚Unternehmen‘) und ›Identitätsobjekte‹ abgeleitet. Im Bereich der Lexeme *Profil* und *Image* fanden sich vermehrt auch ‚Marken‘ und ‚Produkte‘ als ›Identitätssubjekte‹. Das Konzept ›Identitätsobjekte‹, das numerisch geringer realisiert sowie deutlich heterogener als ›Identitätssubjekte‹ ist, tauchte gehäuft bei *identifizieren*, *prägen* und *geben* auf (‚Mitarbeiter‘, ‚Kunden‘, ‚Marken‘, ‚Werte‘ etc). Es ist zu fragen, ob die heterogen und wenig besetzten Objekte im Vergleich zu den Subjekten insgesamt bedeuten, dass UNTERNEHMENSIDENTITÄT ein Konstrukt ist, das von den produzierenden Subjekten (‚Unternehmen‘) auf sie selbst zurückverweist. Es fiel jedoch auf, dass ‚Mitarbeiter‘ sowohl ›Identitätssubjekte‹ als auch ›Identitätsobjekte‹ sein kann, wodurch MITARBEITER eine Scharnierfunktion einnehmen und Innen- und Außenperspektive (Selbstbild + Fremdbild) vereinen: Das UNTERNEHMEN identifiziert sich mit sich selbst; Subjekt und Objekt der Identifizierung (MITARBEITER) sind in ihm vereinigt.

---

<sup>26</sup> Piwinger/Ebert (2001, 13f.) bezeichnen ein *gutes Image* als *Return on Investment*, denn dieses wecke Kompetenz, Glaubwürdigkeit, Offenheit, begründe Reputation, binde Mitarbeiter/Kunden, erzeuge Vertrauen über längere Zeit hinweg und sichere Wettbewerbsvorteile.

<sup>27</sup> Laut CCDB (vgl. Belica 2001ff.) findet sich eine statistisch signifikante Verbindung der *als*-Phrase mit *Identität* (*X als Ausdruck/Symbol von Identität*).

<sup>28</sup> Das Verb *stehen für* verweist auf den indexikalischen Charakter von UNTERNEHMENSIDENTITÄT: „Munich Re steht für ausgeprägte Lösungs-Expertise, konsequentes Risikomanagement, finanzielle Stabilität und große Kundennähe.“ (Munich Re Über Munich Re).

Zuletzt ist zu bemerken, dass die Wörter des Wortfeldes in komplexere Sprachhandlungen eingebunden wurden, z.B. in der Verknüpfung von IDENTITÄT und ERFOLG (etwa durch den finalen Konnektor *um*). Besonders auffällig war diese bei *Identifikation*. Ansonsten wurden Argumentationsstrukturen nur in geringer Anzahl verwendet und vielmehr mit dominanten Zuschreibungen gearbeitet: Das autosemantische Potential mancher Lexeme des Wortfeldes scheint teilweise derart ausgeprägt, dass keine Argumentationen (= als Einbringen eines Gegenstandes) angeschlossen werden müssen (z.B. bei *unternehmerisches Image*). Das semantische Potential wurde zudem durch die musterhaften Anthropomorphisierungen mittels der Metaphernlexeme *Person*, *Persönlichkeit* und *Charakter* sowie durch die Zuschreibung menschlicher VERHALTENSEIGENSCHAFTEN erweitert (um das Morphem *Selbst\** sowie das Verb *sein* (*wir sind x*)). Dieser Befund war sicherlich zu erwarten, da die Personalisierung des UNTERNEHMENS schon durch den Diskurs determiniert wird, da es um UNTERNEHMENSIDENTITÄT geht – um einem UNTERNEHMEN eine Identität zuzuschreiben, muss dieses schon als soziales System angesehen und damit metaphorisiert werden. Dennoch zeigte sich in der Analyse, dass die untersuchten Unternehmen diese Metaphorisierung ausdrücklich einsetzen, indem sie ein UNTERNEHMEN explizit zum MENSCHEN aufwerten (→ 8.4.3.3). Dass die dabei konstruierte IDENTITÄT als steuer- und konstruierbar gesehen wird (›Identitätsart‹ ‚konstruiert‘), konnte die Auswertung des Wortfeldes ebenso aufdecken. Tabelle 15 fasst die vorgestellten Konzepte und Konzeptattribute für UNTERNEHMENSIDENTITÄT abschließend zusammen:

Tabelle 15 - Zusammenfassung Konzepte und Konzeptattribute

| Lexem                                   | Konzepte (Konzeptattribute)                                                                                                                                                                                                                                                                                                                                                                                                          |
|-----------------------------------------|--------------------------------------------------------------------------------------------------------------------------------------------------------------------------------------------------------------------------------------------------------------------------------------------------------------------------------------------------------------------------------------------------------------------------------------|
| <i>Identität und Identity</i>           | ›Identitätsträger‹ (,Unternehmen‘)<br>›Teilidentitäten‹ (,Leistungsidentität‘, ,Führungsidentität‘, ,Gesellschaftspolitische Identität‘)<br>›Identitätsart‹ (,besitzanzeigend‘, ,alleinstellend‘, ,statisch‘, ,dynamisch‘)<br>›Identitätshandlung‹ (,Identitätsentwicklung‘, ,Identitätsstärkung‘, ,Identitätsstiftung‘)<br>›Identitätssubjekte‹ (,Unternehmen‘, ,Marken‘)<br>›Identität als Instrument/Mittel für ein höheres Ziel‹ |
| <i>Corporate Identity</i>               | ›Identitätsart‹ (,neu‘, ,einheitlich‘)<br>›Identitätssubjekte‹ (,Unternehmen‘)<br>›Identitätsobjekte‹ (,Bedürfnisse der Konsumenten‘, ,Management‘, ,Mitarbeiter‘)<br>›Identität als Instrument/Mittel für ein höheres Ziel‹                                                                                                                                                                                                         |
| <i>Identifizier* und Identifikation</i> | ›Identitätssubjekte‹ (,Mitarbeiter‘, ,Kunden‘)<br>›Identitätsobjekte‹ (,Unternehmen‘)<br>›Identitätsfaktoren‹ (,Marke‘, ,Leitbild‘, ,Mitarbeiterbeteiligung und -eigenverantwortung‘, ,Mitarbeiterfeste/Tag der offenen Tür‘, ,verantwortliches/nachhaltiges Wirt-                                                                                                                                                                   |



|                                                 |                                                                                                                                                                                                                                                                                                                                                                                                                                                                                                                                                |
|-------------------------------------------------|------------------------------------------------------------------------------------------------------------------------------------------------------------------------------------------------------------------------------------------------------------------------------------------------------------------------------------------------------------------------------------------------------------------------------------------------------------------------------------------------------------------------------------------------|
|                                                 | schaften')<br>›Identitätsziele< (,Identifikation', ,Vertrauen', ,konzernweite Zusammenarbeit', ,Mitarbeitermotivation', ,Kundenorientierung', ,Erfolg')                                                                                                                                                                                                                                                                                                                                                                                        |
| <i>Person, Persönlichkeit, Charakter, Geist</i> | ›Identitätssteile< (,offen', ,selbstbewusst' etc.)<br>›Identitätsart< (,neu', ,aus Geschichte abgeleitet')                                                                                                                                                                                                                                                                                                                                                                                                                                     |
| <i>Selbst*</i>                                  | ›Identitätshandlung< (,selbst definieren', ,selbst entwickeln' etc.)<br>›Identitätsart< (,Bewusstheit des Selbst', ,belebt')<br>›Identitätsrolle< (,ökonomisch orientiertes Unternehmen', ,gesellschaftlich orientiertes Unternehmen', ,Corporate Citizen' etc.)<br>›Identitätsvorwissen< (,Mitarbeiterwertschätzung, ,Kundenwertschätzung', ,(rechtliche) Prinzipieneinhaltung/-transparenz', ,Umweltschutz und Sicherheit', ,Engagement')<br>›Identitätspflichten< (,Nachhaltigkeit', ,Verantwortung')<br>›Identitätshandlung< (,Umsetzung') |
| <i>Profil und Porträt</i>                       | ›Identitätsart< (,eindeutig', ,alleinstellend', ,verbessert', ,international')<br>›Identitätsrolle< (,Arbeitgeber')<br>›Identitätshandlung< (,Identitätsschärfung')                                                                                                                                                                                                                                                                                                                                                                            |
| <i>Bild und Image</i>                           | ›Identitätsabbild<<br>›Identitätshandlung< (,Identitätsprägung', ,Identitätsvermittlung')<br>›Identitätslokalisierung< (,außen')<br>›Identitätsart< (,konstruiert', ,gut')<br>›Identitätskonservierung<                                                                                                                                                                                                                                                                                                                                        |
| <i>Ruf und Reputation</i>                       | ›Identitätsart< (,erworben', ,gut')<br>›Identitätsrolle< (,attraktiver Arbeitgeber' etc.)<br>›Identitätshandlung< (,Identitätsstärkung')<br>›Identitätslokalisierung< (,außen')<br>›Identitätskonservierung<<br>›Identitätsrisiken<                                                                                                                                                                                                                                                                                                            |

Da UNTERNEHMENSIDENTITÄT durch weitere Sachverhalte kokonstituiert wird, werden diese diskursiv akzentuierten Sachverhalte in Folge präsentiert und wie in den vorangegangenen Kapiteln anhand von Wissensrahmen (Konzepten) aufgefächert.

## 1.2 Sachverhalte, die UNTERNEHMENSIDENTITÄT kokonstituieren

### 1.2.1 AFFEKTE/EMOTIONEN

Das Korpus offenbart eine hohe Anzahl von Verbalisierungen (spezifischer) AFFEKTE und EMOTIONEN, welche direkt an UNTERNEHMEN bzw. deren PRODUKTE gekoppelt werden und

diese „fühlbare“ machen (vgl. Kastens 2008, 222).<sup>29</sup> Durch EMOTIONEN wird mit sprachlichen Mitteln in spezifischen Artikulationsmustern ein spezifisches Repertoire der Unternehmen zum emotionalen Ausdruck<sup>30</sup> abgebildet, das UNTERNEHMENSIDENTITÄT affektiv rahmt. Es stellt sich nun die Frage, wie diese EMOTIONEN sprachlich repräsentiert und damit konstituiert werden. Innerhalb der Textwelt des Diskurses finden sich das Substantiv *Emotion* sowie die Derivation *emotional* seriell, wobei Letztere häufiger genutzt wird. In Syntagmen (*emotional*\* + X) ist sie meist PRODUKTEN vorangestellt:

Fachkundige und motivierte Mitarbeiter entwickeln und fertigen innovative, emotionale Produkte. (VW GB 2010)

*Emotional* kann zunächst einmal nur ein MENSCH sein, weshalb der Leser beim Wort *Produkte* zunächst stockt und das Attribut ‚emotional‘ metaphorisch umdeuten muss: So wird das Konzept ›Produkt als Auslöser der Emotion‹ aufgerufen, was besonders im Bereich der Automobilhersteller sowie der Handelsunternehmen auffällt.<sup>31</sup> Darüber taucht *emotional*\* im Kontext von *Unternehmen* auf:

Ein Lied für die Welt: Zum insgesamt emotionaleren Auftritt des Unternehmens gehört auch ein eigener Henkel-Song: „We together“. (Henkel Corporate Identity)

56 Prozent [der Mitarbeiter, S.B.] gaben an, eine hohe emotionale Bindung an das Unternehmen zu haben. (Metro GB 2010)

Man könnte demnach behaupten, das Konzept ›Produkt als Auslöser der Emotion‹ würde metonymisch auf das UNTERNEHMEN übertragen (›Unternehmen als Auslöser der Emotion‹). Betrachtet man die Repräsentationen des Substantivs *Emotion*\*, fällt auf, dass dieses im musterhaft realisierten Syntagma *Emotionen hervorrufen/wecken* ebenso dieses Konzept evoziert:

20 Prozent unserer Arbeit widmen wir automobilen Träumen, Studien oder Konzeptfahrzeugen. Sie machen Schlagzeilen, weil sie Emotionen wecken. (VW GB 2010)

Im folgenden Beispiel von Vw wird der ›Emotionsauslöser‹ (*Bentley*) gleichzeitig zur ›Emotionseigenschaft‹ (*automobile*) transponiert:

Bentley, das sind automobile Emotionen ‚made in England‘. (VW GB 2010)

Das bedeutet, es handelt sich um positive EMOTIONEN (etwa der Kunden) gegenüber dem AUTOMOBIL, die durch das Adjektiv *automobile* als EMOTIONEN ganz eigener Art konstituiert werden. In den aufgeführten Belegen fällt derweil insgesamt auf, dass zwar ›Emotionsauslöser‹ (‚Unternehmen‘, ‚Produkte‘) vorhanden sind, jedoch ›Emotionsadressaten‹ (bei wem

---

<sup>29</sup> Auch Iaksson/Jørgensen (2010, 230ff.) bestätigen in ihrem Ethos-Modell, dass Unternehmen sich *Virtues* und *Emotions* zuschreiben.

<sup>30</sup> Vgl. dazu Reins (2006, 33ff.): Mit „Fühlen“ behaftete Sprache kann beim Rezipienten effizienter abgespeichert werden, da emotive Informationen von der rechten Gehirnhälfte vorab aufgenommen werden, bevor die rationale Information in der linken Gehirnhälfte angekommen ist. Rationale Informationen werden besser erinnert, wenn sie mit Emotionen verknüpft sind oder individuelle Erlebnisse daran gekoppelt werden.

<sup>31</sup> Vgl. dazu auch die anaphorischen Fügungen *Abenteuer Automobil*, *Leidenschaft Automobil*, *Faszination Automobil* im Text VW GB 2010.

weckt X Emotionen?) beständig gänzlich ausgespart werden. Diese Tatsache verweist auf das Konzept ›Produkt oder Unternehmen generieren Emotionen ex ante‹, was jedoch ein ontologisches Problem darstellt, da Emotionen nur existieren, wenn sie von einem bewussten Subjekt erfahren und empfunden werden, d.h. sie haben keine objektive, sondern eine subjektive Ontologie (vgl. Searle 2009, 88). Die Konzeptualisierung ›Produkt oder Unternehmen generieren Emotionen ex ante‹ zeigt sich auch in der sprachlichen Verbindung *Emotionalisierung der Marke* (z.B. im METRO *Geschäftsbericht 2010*). Diese Konstruktion impliziert, dass die MARKE durch *Emotionalisierung* gewisse EMOTIONEN ex ante zugeschrieben bekommen soll, die sie dahingehend personalisieren.<sup>32</sup> Sachverhalte wie MARKEN, PRODUKTE sowie das gesamte UNTERNEHMEN werden somit emotional aufgeladen („fühlbar“).

Des Weiteren finden sich im Korpus spezifische EMOTIONEN, auf die durch Hyponyme zu *Emotion* referiert wird, und das Konzept ›Emotionsart‹ näher charakterisieren. Es werden dabei vor allem ‚euphorische Emotionen im Bereich der Basisemotion Freude/Ekstase‘ eingesetzt.<sup>33</sup> Bereits in den *Claims* der Unternehmen wird eine makropropositionale Referenz auf solche vorgenommen, z.B. bei BMW (*Freude am Fahren*), DEUTSCHE BANK (*Leistung aus Leidenschaft*), BEIERSDORF (*Passion for Skin & Beauty Care*), HENKEL (*Excellence is our Passion*).<sup>34</sup> Am häufigsten werden insgesamt LEIDENSCHAFT<sup>35</sup> (v.a. bei DEUTSCHE BANK in diversen Varianten) und BEGEISTERUNG (→ dieser Anhang, 1.1.1; 1.1.2), teilweise mit fraglichen semantischen Passungen, konstituiert. In den folgenden Kapiteln werden beide, gefolgt von weiteren EMOTIONEN, die relevant für die affektive Prägung von UNTERNEHMENSIDENTITÄT sind, diskutiert (FREUDE und SPASS (→ 9.2.1.3), STOLZ (→ 9.2.1.4), moderatere EMOTIONEN (→ 9.2.1.5) und ERLEBNISSE (→ 9.2.1.6)).

### 1.2.1.1 LEIDENSCHAFT

Das Substantiv *Leidenschaft* findet sich regelhaft auf der Sprachoberfläche in Adverbialien eingebettet, welche durch die Präposition *mit* (*mit Leidenschaft*) das Konzept ›Leidenschaft als Instrument‹ aufrufen; im Kontext dieser befinden sich häufig die Verben *arbeiten*, *leisten* und *einsetzen*:

<sup>32</sup> EMOTIONEN spielen im Zusammenhang der Individualisierung von MARKEN eine tragende Rolle und fungieren als Nutzenversprechen, um sich von Wettbewerbern zu differenzieren (vgl. Homburg/Krohmer 2009, 475).

<sup>33</sup> Nach Schwartz (1994) lassen sich Emotionen in angenehme (euphorische) und unangenehme (dysphorische) Gefühle einteilen. Euphorische Emotionen sind besonders häufig bei BMW, DAIMLER, VW, TELEKOM, FMC, HENKEL, LINDE, METRO sowie DEUTSCHE BANK auffindbar. Dysphorische Emotionen (Furcht/Angst/Bedrohung) werden im Korpus selten und nur in Zusammenhang mit WIRTSCHAFTS- UND FINANZKRISE, WANDEL und HERAUSFORDERUNGEN erwähnt (→ dieser Anhang, 1.12).

<sup>34</sup> Im weiteren Sinne zählen dazu auch BAYER (*Science for a better Life*), TELEKOM (*Great Experience*) sowie ADIDAS (*Spirit of Sports*).

<sup>35</sup> Ebenfalls Isaksson/Jørgensen (2010, 230) nennen *Passion* als höchsten auffindbaren Emotionsappell.

Wir sind heute in einer deutlich stärkeren Position als vor der Krise und auf dem Weg, die selbst gesteckten Ertrags- und Wachstumsziele entschlossen zu realisieren. Dafür haben wir investiert und daran arbeiten wir mit Leidenschaft. (Deutsche Bank GB 2010)

Mit Leidenschaft Herausragendes leisten. (Linde Der Linde Spirit)

Das Konzept ›Leidenschaft als Instrument‹ wird in seiner instrumentalen Funktion noch unterstrichen durch appositionsartige Realisierungen (*Mit [...] Leidenschaft*):

Wir haben das Automobil erfunden. Und erfinden es immer wieder neu. Mit Begeisterung und Leidenschaft. (Daimler GB 2010)

Das letzte Beispiel von DAIMLER zeigt bereits die oft vorgenommene Doppelung von Ausdrücken (*Begeisterung und Leidenschaft*), die das Konzept ›Emotionsart‹ bedienen. Ebenso tauchen als n-Gramme *Engagement und Leidenschaft* sowie *Freude und Leidenschaft* auf.<sup>36</sup> Im Gegensatz zum Konzept ›Leidenschaft als Instrument‹ impliziert die sprachliche Realisierung durch die Konstruktion *aus/auf Leidenschaft*, die seltener genutzt wird, die Konzeptualisierung ›Leidenschaft als Motivation und Basis‹. Die DEUTSCHE BANK arbeitet hiermit bereits in ihrem *Claim (Leistung aus Leidenschaft)* und unterstreicht das Konzept im Text durch die Kombination mit der Konstruktionsmetapher *auf Leidenschaft beruhen*:

Auf dieser Leidenschaft beruht das Vertrauen, das Menschen in uns setzen. Dabei kommt es auf jeden Einzelnen an. Jeder macht einen Unterschied. (Deutsche Bank Leitbild und Marke)

Die Emotion LEIDENSCHAFT ist damit die BASIS, von der aus Handlungen von DEUTSCHE BANK vorgenommen werden. Zusätzlich finden sich rechtsseitige Attributionen der Form *Leidenschaft für X*, die syntaktisch ›Leidenschaftsobjekte‹ fordern (z.B. *Leidenschaft für Autos*). ‚Erfolg‘ wird ebenfalls als Konzeptattribut an ›Leidenschaftsobjekte‹ geknüpft und teilweise ausdrucksseitig durch das englische Wort *Success* aufgerufen:

Mit unserer Consumer Business Strategie „Passion for Success“ haben wir das Fundament für die nachhaltige Steigerung unserer Marktanteile durch qualitatives Wachstum gelegt. (BDF Imagebroschüre)

Die Satzebene weist diverse prädikative Nominative auf, die ein direktes Prädikativum (für ›Leidenschaftsobjekte‹) fordern:

Leistung ist unsere Leidenschaft. (Deutsche Bank Leitbild und Marke)

Hauptpflege ist unsere Leidenschaft. (BDF Unser Profil)

Die Fügungen *ihre Leidenschaft* oder *Leidenschaft* + Genitivattribut beziehen sich dagegen auf ›Leidenschaftsträger‹, obwohl diese Attributionsart im Korpus weniger häufig vorgenommen wird.<sup>37</sup> Die aufgefundenen Beispiele beziehen sich in fast allen Fällen auf

---

<sup>36</sup> Vgl. dazu: „Diese drei Beispiele haben eines gemeinsam: Sie zeigen, wie unsere Mitarbeiter jeden Tag mit Engagement und Leidenschaft daran arbeiten, tragfähige Antworten auf die Herausforderungen unserer Zeit zu geben [...]“. (Siemens Vision).

<sup>37</sup> Vielmehr finden sich Konstruktionen dieser Art: „Daimler hat das Automobil erfunden – Und gestaltet mit Leidenschaft seine Zukunft.“ (Daimler Daimler hat das Automobil erfunden).

„Mitarbeiter“, wobei im Restsatz eine metonymische Übertragung auf „Unternehmen“ stattfindet:

Mitarbeiter: Ihre Leidenschaft, ihr Pioniergeist und ihre Kompetenz haben uns an die Spitze gebracht. (BASF Gemeinsam Zukunft gestalten)

„Mitarbeiter“ wird jedoch durch ausdrucksseitige Besetzung mit *leidenschaftlich*\* in seiner Relevanz unterstrichen:

Leidenschaftliche und talentierte Mitarbeiter. Wir arbeiten leidenschaftlich und vertrauensvoll über Organisationsgrenzen hinweg auf den gemeinsamen Erfolg hin. (Infineon GB 2010)

Gerade in diesen Belegen ist die semantische Transparenz jedoch fraglich, da nicht expliziert wird, für was die angesprochene LEIDENSCHAFT der MITARBEITER besteht. Vielmehr scheint von Bedeutung, auszudrücken, dass LEIDENSCHAFT besteht und dass *mit* dieser gearbeitet wird. Zuletzt zeigen sich auch Sachverhaltsverknüpfungen, die den Schluss ›Leidenschaft führt zu ökonomischen Zielen‹ nahelegen:

Siemens beschäftigt Menschen, die die Welt von morgen prägen. Ihr Know-how und ihre Leidenschaft zählen zu den wichtigsten Faktoren für den langfristigen Wettbewerbserfolg. (Siemens GB 2010)

### **1.2.1.2 BEGEISTERUNG**

BEGEISTERUNG wird als zweithäufigste spezifische Emotion im Korpus konstituiert. Teilweise weisen Komposita mit *\*begeisterung* bereits auf die ›Begeisterungsart‹ hin:

Wir haben gesehen, wie Technikbegeisterung Kunden und Mitarbeiter verbindet. (Metro GB 2010)

Meist wird auf BEGEISTERUNG jedoch mit dem Verb *begeistern* referiert:

Die Automobile des Volkswagen Konzerns werden von unserer Spitzenmannschaft in höchster Qualität und mit großem Engagement hergestellt – und begeistern Kunden rund um den Globus. (VW GB 2010)

In diesen syntaktisch transparenten Konstruktionen kristallisieren sich relativ homogen als ›Begeisterungsträger‹ „Produkte“ und „Marken“ heraus; als ›Begeisterungsobjekte‹ (im Akkusativ) werden „Kunden“ offenbar.<sup>38</sup> Dabei tauchen auch deontische Konstruktionen ohne realisierte ›Begeisterungsträger‹ auf, wobei aus dem Kontext das „Unternehmen“ erschlossen wird, welches „Kunden“ zu begeistern sucht:

Kunden begeistern: Hier geht es um das wichtigste Gut des Konzerns, den Kunden. Es geht um die Gedanken, Emotionen, Bedürfnisse und Erfahrungen der Kunden. Sie sind der Antrieb für den Erfolg der Telekom. (Telekom Die Unternehmenswerte der Deutschen Telekom)

Durch mit Präpositionen (*durch*, *mit*) eingeleitete Adverbialien lassen sich „Produkte“ des Unternehmens als ›Begeisterungsinstrumente‹ modellieren:

Wir begeistern unsere Kunden durch exzellente Produkte und Services. (Telekom T-Spirit – Das Leitbild der Deutschen Telekom)

---

<sup>38</sup> In Variation kommen dabei auch Relativsätze zum Einsatz: „Das Unternehmen setzt dabei auf innovative und grüne Technologien sowie auf sichere und hochwertige Fahrzeuge, die ihre Kundschaft faszinieren und begeistern.“ (Daimler Das Unternehmen 2011).

Schließlich finden sich auch die Syntagmen *begeistern/Begeisterung für Y*, die ›Begeisterungsziele‹ der Unternehmen syntaktisch einfordern. DAIMLER verweist dabei im folgenden Beleg reflexiv mittels des Eigennamens *Daimler* auf das eigene UNTERNEHMEN (‚Unternehmen‘) zurück:

So vermittelt unsere Initiative Genius Kindern und Jugendlichen wertvolle Einblicke in Zukunftstechnologien und Berufsbilder in der Automobilindustrie, um sie schon frühzeitig für Ingenieurberufe und Daimler zu begeistern. (Daimler GB 2010)

So wird BEGEISTERUNG direkt mit DAIMLER verknüpft.<sup>39</sup> Weitere spezifische EMOTIONEN, die seriell, aber in geringerer Anzahl als LEIDENSCHAFT und BEGEISTERUNG vorkommen, werden in den folgenden Abschnitten aufgeführt.

### 1.2.1.3 FREUDE und SPASS

FREUDE sowie SPASS finden sich häufig bei den Automobilisten als EMOTIONEN. Das Substantiv *Freude* wird im Korpus wiederum musterhaft mit *Arbeit* verknüpft (›Freudeauslöser‹ ‚Mitarbeit im Unternehmen‘):

Wir haben den Anspruch, das Unternehmen zu sein, bei dem Freude an der Arbeit und Innovationskraft zusammenfinden. (Merck GB 2010)

Bei BMW dient *\*freude* der Kopplung mit dem PRODUKT (wie der *Claim* bereits zeigt: *Freude am Fahren*), was im folgenden Beleg metasprachlich durch *Inbegriff* sowie konzeptuell durch die ›Freudeart‹ (*Fahrfreude*) angezeigt wird:

Mit nahezu 700.000 verkauften Fahrzeugen war bereits die erste Generation des BMW 5er ein spektakulärer Erfolg, der als Inbegriff für Ästhetik und Fahrfreude die obere Mittelklasse prägte. (BMW GB 2010)

*Fahrfreude* wird hierbei ausdrucksseitig durch *BMW 5er* besetzt (*Inbegriff*) und damit entsprechend für BMW lexikalisch-semantisch kodifiziert.<sup>40</sup> Auch das Substantiv *Spaß* ist häufig in das Syntagma *Spaß an der Arbeit* sowie *Spaß an Leistung* eingebunden (›Spaßauslöser‹ sind somit ‚Arbeit‘ und ‚Leistung‘):<sup>41</sup>

Wir schaffen ein Klima für Innovationen und Spaß an Leistung. (Telekom T-Spirit – Das Leitbild der Deutschen Telekom)

Damit wird der Leistungsbegriff für spezifische Anspruchsgruppen (z.B. Mitarbeiter) positiv konnotiert. *\*Spaß* wird von den Automobilisten wiederum zur Bildung von Komposita (*Fahrspaß*) gebraucht (›Spaßauslöser‹ ‚Produkt‘):

Grüne Autos“ scheinen eher „Vernunftautos“ zu sein und mit Fahrspaß nicht so recht zusammenzupassen. Bedeutet das die Abkehr vom Premiumautomobil? Ganz im Gegenteil: Es ist kein Zufall, dass der erste

---

<sup>39</sup> Vgl. dazu auch die Verknüpfung mit ÖKONOMISCHEN ZIELEN: „Der Erfolg der „Vier Ringe“ auf allen Märkten rund um den Globus und nicht zuletzt die zahlreichen renommierten Preise und Auszeichnungen, die jährlich an die Audi-Modelle verliehen werden, belegen das Begeisterungspotenzial der Marke.“ (VW GB 2010).

<sup>40</sup> Vgl. zur ausführlichen Auswertung des BMW-Markenlexems *Freude* die Auswertung Kastens‘ (2008, 154ff.).

<sup>41</sup> Eine eher ungewöhnliche Verbindung im Korpus zeigt METRO: „Die chinesischen Verbraucher entdecken zunehmend den Spaß am Konsum.“ (Metro GB 2010). Vgl. dazu Reckwitz (2001, 33f.), der im Hinblick auf postmoderne kollektive Identitäten die Lebensstiltheorien (z.B. gemeinsamer Konsumstil) reflektiert.



Hybrid eines europäischen Herstellers eine Mercedes-Benz S-Klasse ist. Sogar unseren neuen Supersportler – den SLS AMG – haben wir von Anfang an auch mit rein elektrischem Antrieb konzipiert. Und es gibt kein Auto, das mehr Fahrspaß bietet als gerade der SLS. [...] Und zumindest Mercedes-Benz Kunden werden nicht wählen müssen zwischen „grün“ und „emotional“: Wir bieten ihnen beides. (Daimler Unternehmensinformationen 2010)

In diesem Beispiel ist es auffallend, dass erst eine antithetische Gegenüberstellung durch *vernünftautos* (VERNUNFT) und *Fahrspaß* (SPASS) stattfindet, die zum Ende jedoch durch die Synthese von *grün* und *emotional* aufgelöst wird. Auch andere Belege besitzen kohäsive Verknüpfungen von SPASS und den Sachverhalten UMWELTSCHUTZ oder SICHERHEIT:

Hundert Prozent Spaß und lokale Null-Emission mit dem smart fortwo electric drive. (Daimler GB 2010)

In Australien organisieren wir jährlich gemeinsam mit einem Kinderkrankenhaus in Sydney das „Kidney Kids Camp“, ein Ausflugswochenende für junge Peritonealdialyse-Patienten, bei dem sowohl für Spiel und Spass als auch für eine sichere Dialysebehandlung unter der Aufsicht professioneller Dialysefachkräfte gesorgt ist. (FMC GB 2010)

Als partielle Synonyme zu *Freude* und *Spaß* sind im Korpus *Vergnügen*<sup>42</sup> und *Enthusiasmus*<sup>43</sup> auffindbar, die aufgrund ihrer geringen Anzahl nicht charakteristisch für den Diskurs sind.

#### 1.2.1.4 STOLZ

Eine weitere spezifische EMOTION, die im Korpus auffällt, ist STOLZ, auch wenn diese nur 34 *Hits* für *Stolz* bzw. *stolz* aufweist. Meist wird auf der Sprachoberfläche das adjektivische Syntagma *stolz sein auf X* realisiert:

Erstmals sind die Auszubildenden in Deutschland nach ihrer Zufriedenheit befragt worden – rund 300 Azubis beteiligten sich. Fast 90% der Befragten sind stolz darauf, bei K+S zu lernen und wollen nach Abschluss der Ausbildung gerne bei K+S bleiben. (K+S GB 2010)

Dieser Beleg steht exemplarisch für die zahlreichen Beispiele, in welchen der ›Stolzträger‹ der ‚Mitarbeiter‘ und die ›Stolzquelle‹ das ‚Unternehmen‘ ist. Der STOLZ der MITARBEITER erwächst daraus, dass sie ein gewichtiger Teil des UNTERNEHMENS sein *dürfen*. Dadurch findet eine metonymische Übertragung von STOLZ auf das gesamte UNTERNEHMEN statt. Die Belege mit den Konstruktionen *ist/sind + stolz* drücken dabei einen permanenten ›Stolz-zustand‹ aus:

Wir sind stolz auf Rang drei bei der Zahl neuer Patente in Deutschland, Rang zwei in Europa und auf Rang 13 in den USA. (Siemens GB 2010)

Das Gefühl STOLZ wird in diesem Beleg somit bei der *wir*-Gruppe durch *Patente* getriggert. In diesem Zusammenhang sind auch die metonymischen Ersetzungen des Ausdrucks *Stolz* durch *Herz* bedeutsam, die im Korpus vielfach vorgenommen werden, v.a. bei METRO:

Das Herz von Julia Liu schlägt für ihr Unternehmen. Es schlägt für ihr großartiges Team im Media Markt in der Huai Hai Road in Shanghai. (Metro GB 2010)

---

<sup>42</sup> Vgl. dazu: „Das Fahrvergnügen beginnt ganz einfach an der Haushaltssteckdose.“ (Daimler GB 2010).

<sup>43</sup> Vgl. dazu: „Wer mit Leidenschaft arbeitet, zeigt Enthusiasmus. Er entwickelt seine Talente stetig weiter und erreicht dementsprechend hohe Ergebnisse.“ (VW GB 2010).

*Herz* wird dabei mit der Verbmetapher *schlagen* kombiniert und durch die Präposition *für* an das ›Stolzziel‹ (*für X*) ‚Unternehmen‘ gebunden. Folglich findet ebenfalls eine metonymische Übertragung von STOLZ auf das UNTERNEHMEN statt. Wiederaufgenommen wird dieses Bild auch im Syntagma *mit ganzem Herzen*.<sup>44</sup> Abgeschwächte Absolutheitsansprüche verwenden die Automobilisten, indem *Herz* an PRODUKTE oder MARKE geknüpft wird:

„Der Kunde“, so Kaban, „findet nicht nur rational zu einer Marke und einem Modell. Das Herz entscheidet mit.“ (VW GB 2010)

#### **1.2.1.5 MODERATERE EMOTIONEN**

Weniger häufig tauchen im Diskurs, neben den starken euphorischen EMOTIONEN, moderatere EMOTIONEN auf. Dennoch zeigt sich im Branchenvergleich eine Verdichtung dieser im Pharmabereich:

Die Zufriedenheit unserer Patienten und Klinikmitarbeiter messen wir jeweils auch mit Hilfe regelmäßiger Befragungen. (FMC GB 2010)

Es geht dabei vor allem um ZUFRIEDENHEIT, was sich durch den Lebensbereich, in dem die Pharmaunternehmen operieren, erklären lässt (PATIENTEN, KRANKHEITEN etc.<sup>45</sup>). Das Konzept ›Zufriedenheitsmessung‹ betonen jedoch auch andere Unternehmen:

Alle Geschäftsbereiche befragen in regelmäßigen Abständen ihre Kunden zur Produktqualität und den damit verbundenen Prozessen und Dienstleistungen. Neben Zufriedenheitsanalysen liefern uns persönliche Gespräche sowie die Reklamationsstatistik konkrete Ansatzpunkte für weitere Verbesserungen [...]. (K+S GB 2010)

Interessant ist schließlich auch, dass viele Unternehmen AFFEKTE (wie MOTIVATION und INSPIRATION) in Bezug auf den Sachverhalt ARBEITSUMFELD versprachlichen (›Motivations-/Inspirationsträger‹ ‚positives Arbeitsumfeld‘):

Raum für Inspiration: [...] Flanier-Boulevard und die offene Campus-Struktur schaffen ein inspirierendes Arbeitsumfeld. (ThyssenKrupp GB 2010)

Denn das macht Merck aus: Ein inspirierendes und motivierendes Arbeitsumfeld, in dem jeder die Chance hat, außergewöhnliche Leistungen zu vollbringen und sich gleichzeitig weiterzuentwickeln. (Merck GB 2010)

Im letzten Beispiel bindet MERCK *Arbeitsumfeld* durch das Verb *ausmachen* dabei unmittelbar an seine UNTERNEHMENSIDENTITÄT (durch den Eigennamen *Merck*) zurück.

#### **1.2.1.6 ERLEBNISSE**

Bei der Textanalyse fiel ebenso auf, dass diversen Sachverhalten eine ›positiv bewertete Erlebnishaftigkeit‹ zugeschrieben bzw. diese anvisiert wird:

Das internationale Sortiment [von Kaufhof, S.B.] mit hochwertigen Marken, die angenehme Atmosphäre und das umfassende Serviceangebot inspirieren die Kunden und tragen zu einem erlebnisreichen Einkauf bei. (Metro GB 2010)

---

<sup>44</sup> Dieser Beleg scheint, von seiner semantischen Passung aus gesehen, durchaus fraglich.

<sup>45</sup> FMC sowie FRESENIUS können bereits durch ihre Produktparte teilweise keine euphorischen Emotionen nutzen, da es ihren Kunden (den *Patienten*) teilweise physisch sehr schlecht geht.

Durch sich wiederholende Komposita des Musters *X + \*erlebnis* wird dabei eine konkrete ›Erlebnisart‹ spezifiziert, wobei am häufigsten *Kundenerlebnis* verbalisiert wird:

Exzellente Produkte mit hervorragendem Kundenerlebnis bilden die Grundlage unseres Erfolgs. (Daimler GB 2010)

Weitere frequent genutzte Komposita sind *Produkt-* und *Kauferlebnis*. Das Substantiv *Erlebnis* wird ohne weitere Spezifizierung durch ein Determinans vielfach mittels eines positiv wertenden Adjektivs attribuiert, wodurch die ›Erlebnisart‹ ‚intensiv‘ evoziert wird:

Am Steuer eines tollen Wagens zu sitzen, ist ein großartiges Erlebnis. (VW GB 2010)

Bedeutsam scheint im folgenden Beleg, der das englische Syntagma *great Experience* aufweist, dass der Ausdruck *Alleinstellungsmerkmale* im Kontext auftaucht, da von der TELEKOM ein Zusammenhang zwischen ERLEBNIS und ALLEINSTELLUNG (IDENTITÄT) konstruiert wird:

Unter dem Leitmotiv „The great Experience“ erarbeiten wir derzeit Alleinstellungsmerkmale, die unsere Arbeitgebermarke unverwechselbar machen. (Telekom GB 2010)

Innerhalb des Lexemverbandes *erleb\** fällt darüber auch das Adjektiv *erlebbar* auf: Dieses wird meist in Bezug auf Konkreta wie *Produkt* oder *Marke* (›Erlebnisquelle‹) gebraucht:

Mit Engagements in den Bereichen Sport, Lifestyle und Mode ist die Marke auch in anderen Lebenswelten präsent und erlebbar. (Daimler Das Unternehmen 2011)

Jedoch werden auch Abstrakta wie *Innovationen* zur ›Erlebnisquelle‹:

Unsere Leistungskraft wächst mit unserer Größe, unserem Wissen, unserer Innovationsfähigkeit und der Verknüpfung aller unserer Bereiche zu einem schlagkräftigen Leistungsverbund. Das wollen wir unseren Kunden als konkreten Vorteil für ihren eigenen Erfolg erlebbar machen. (HeidelbergCement Corporate Mission)

Markant zeigt sich dabei – wie im letzten Beleg – auf der Satzebene die Verwendung des imperativischen bzw. deontischen Infinitivs *erlebbar machen*. Sachverhalte (INNOVATIONEN, LEISTUNG) werden somit in einem Appell des Unternehmens an sich selbst eingebunden, diese ‚fühlbar‘ zu machen. Ebenfalls mit dem Verb *erleben* finden sich hauptsächlich imperativische bzw. deontische Infinitive, die an *X* (meist nicht explizit realisiert) einen Appell zum konkreten ERLEBEN von *Y* (häufig durch Abstrakta realisiert) darstellen:

Wachstum erleben. (K+S GB 2010)

Bei der Auswertung dieses Musters war auch das Verb *erfahren* markant, indem eine positive EMOTION durch das, was *erfahren* wird, metaphorisch konstruiert wird:

Vielfalt erfahren. (VW Zahlen.Daten.Fakten)

Dabei werden zahlreiche Abstrakta, die sich nicht auf klassische EMOTIONEN beziehen, als *Y*-Komponente verwendet. *Wachstum* wird beispielsweise als ‚physisch‘ erfahrbares ERLEBNIS von WACHSTUM konstituiert. Konstruktionen mit dem Partizip *gelebt\** (*gelebte\* Kultur*) beziehen sich dagegen nicht mehr auf Appelle, sondern auf die bereits umgesetzte ›Belegung von abstrakten Sachverhalten‹. Auch das Derivat *lebendig* impliziert die vollzogene Umset-

zung der ›Belebung von abstrakten Sachverhalten‹. HENKEL nutzt diesbezüglich eine Text-Bild-Verknüpfung mit einer stark bearbeiteten Fotografie und folgendem Bildtitel:

Lebendig und optimistisch: So präsentiert sich das Corporate Design von Henkel. (Henkel Corporate Identity)

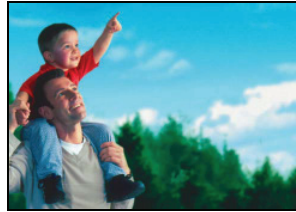

Abbildung 84 - Henkel Corporate Identity

Durch die visuelle Zusatzinformation kann eine Verknüpfung von *lebendig* mit dem Bildinhalt /Vater und Sohn/ vorgenommen werden, was zusätzlich positive Bedeutungsattribute (‚Mensch‘ oder ‚Familie‘) auf HENKEL überträgt, um eine personale IDENTITÄT zu indizieren. Schließlich wird der Sachverhalt ERLEBNISSE durch spezifische Hyponyme zu *Erlebnis* (*Feier*, *Abenteuer*<sup>46</sup>, *Reise*, *Traum/Träume*<sup>47</sup>, *Moment*<sup>\*48</sup>) mit dem Konzept ›Erlebnisart‹ angereichert. Solche ERLEBNISSE prägen UNTERNEHMENSIDENTITÄT dahingehend, als sie zum personalen Erlebnishorizont der Rezipienten beitragen und die MITARBEIT bzw. PRODUKTE des Unternehmens ebenso mit dieser Erlebnishaftigkeit affektiv aufladen.

#### **1.2.1.7 Fazit: AFFEKTE/EMOTIONEN**

Das Anführen von EMOTIONEN erscheint als wichtige sprachliche Codierung von UNTERNEHMENSIDENTITÄT. Die versprachlichten EMOTIONEN werden vom Rezipienten nachempfunden, obwohl sie durch den Filter der Schriftlichkeit bereits überwunden sind. Im nächsten Schritt werden sie affektiv auf das UNTERNEHMEN übertragen (vgl. Meffert 2000, 806ff.).<sup>49</sup> Die kontextuelle Einbettung von EMOTIONEN wird jedoch häufig, wie die Belege zeigten, nicht semantisch transparent vorgenommen (z.B. *leidenschaftliche Mitarbeiter* oder das Fehlen von ›Emotionsadressaten‹). Durch die Zentrierung auf LEIDENSCHAFT und BEGEISTERUNG im Diskurs gibt es außerdem kaum Hinweise (außer bei BMW und HENKEL), dass Unternehmen ein individuelles Emotionsprofil haben, das ihre UNTERNEHMENSIDENTITÄT einmalig erscheinen lässt.

---

<sup>46</sup> Vgl. dazu: „abenteuer automobil –Bugatti Royale Park Ward von 1933, drei Tonnen schwer, sechs Meter lang, 12,8-Liter-V8-Motor, 300 PS stark und 160 km/h schnell.“ (VW GB 2010).

<sup>47</sup> Vgl. dazu: „20 Prozent unserer Arbeit widmen wir automobilen Träumen, Studien oder Konzeptfahrzeugen. Sie machen Schlagzeilen, weil sie Emotionen wecken.“ (VW GB 2010).

<sup>48</sup> Vgl. dazu: „Ein Anschluss für bewegende Momente. Grenzenlos mobil werden lokal emissionsfreie Elektrofahrzeuge erst durch eine standardisierte Strom-Infrastruktur.“ (Daimler GB 2010).

<sup>49</sup> Vgl. dazu Schmitt/Simonson (1998, 23): „In einer Welt, in der die Grundbedürfnisse der meisten Konsumenten befriedigt sind, kann ein Nutzen dadurch angeboten werden, dass der Erfahrungs- und Erlebnishunger der Verbraucher gestillt wird – ihre ästhetischen Bedürfnisse somit befriedigt werden.“.

## 1.2.2 VERHALTENSEIGENSCHAFTEN

Neben AFFEKTEN/EMOTIONEN finden sich diverse VERHALTENSEIGENSCHAFTEN, die UNTERNEHMENSIDENTITÄT kokonstituieren. Es geht daher in den folgenden Kapiteln um ETHIK (→ 9.2.2.1), VERTRAUEN (→ 9.2.2.2), SICHERHEIT (→ 9.2.2.3), TRANSPARENZ (→ 9.2.2.4) und QUALITÄT (→ 9.2.2.5).

### 1.2.2.1 ETHIK

In den Repräsentationstexten fallen die Ausdrücke *Ethos*<sup>50</sup> bzw. *Ethik* und *\*ethik* ins Auge, die als „Gesamtheit sittlicher Normen und Maximen“ (Duden 2001, 498) gelesen werden können, die Unternehmen konsensual für sich beanspruchen (wollen):

Ein wesentliches Element von Integrität ist korrektes Verhalten im täglichen Geschäftsbetrieb und im Unternehmensalltag. Daimler befasst sich daher schon seit Jahren mit Fragen der Geschäfts- und Unternehmensethik sowie selbstverständlich der Einhaltung der rechtlichen Rahmenbedingungen. (Daimler Verhaltensrichtlinien)

Unter ETHIK fassen die Unternehmen, wie die Analyse aufdeckt, Sachverhalte wie INTEGRITÄT, RESPEKT, EHRLICHKEIT und FAIRNESS.<sup>51</sup> Das bedeutet, Unternehmen befassen sich mit der Frage, welchen moralischen Wertvorstellungen sie genügen sollen; dabei wird das Konzept ›Unternehmenshandeln folgt ethischen Grundsätzen‹ deontisch mitaufgerufen. Gleichzeitig wird durch linksseitige Anschlüsse von *\*ethik* mehrfach eine ›Standardisierung der Ethik‹ verlangt:

Wir verlangen von ihnen [Geschäftspartnern, S.B.], jederzeit und überall mit Siemens vergleichbare Standards in der Geschäftsethik anzuwenden. (Siemens GB 2010)

Die Prinzipien, die für den Wert „verantwortungsvoll“ stehen, dienen als Kompass, den wir nutzen, um unsere Geschäftsentscheidungen zu treffen. Darüber hinaus müssen wir Geschäftspartner, Lieferanten und andere Interessenvertreter dazu ermutigen, einen ähnlichen Standard für ihre Geschäftsethik anzuwenden. (Siemens Unsere Werte)

Eine ›Standardisierung der Ethik‹ setzt eine sprachliche Fixierung der ETHIK voraus, auf welche im Kontext von *\*ethik/ethisch\** intertextuell verwiesen wird, z.B. auf den *Code of Conduct*, auf *Verhaltensrichtlinien/-kodices* oder *Leitbilder* (→ 5.2.2):

Leitbild und Code of Conduct sind der rechtliche und ethische Rahmen unseres unternehmerischen Handelns. (MAN Unternehmensleitbild)<sup>52</sup>

Ausdruckskomplexe wie *ethische\* Rahmen* oder *Regelwerk* untermauern die Sprachhandlung der Sachverhaltsfestsetzung von ETHIK zusätzlich auf der lexikalischen Ebene.

---

<sup>50</sup> Vgl. dazu Isaksson/Jørgensen (2010, 230) sowie das Institut für Wirtschaftsethik (2012).

<sup>51</sup> Vgl. dazu die Kapitel → dieser Anhang, 1.2.1.1.; 1.2.1.2; 1.2.1.3.; 1.2.1.4.

<sup>52</sup> Vgl. dazu auch: „Mit dem Verhaltenskodex hat Merck ein Regelwerk geschaffen, das Mitarbeitern von Merck helfen soll, verantwortungsbewusst zu handeln und in der täglichen Arbeit die richtigen Entscheidungen zu fällen.“ (Merck GB 2010).

Des Weiteren wird das Adjektiv *ethisch*\* mit Substantiven wie *Grundsätze\*/Standards/Prinzipien* kombiniert, die ebenfalls Fixierungen von HANDLUNGEN, die als gültig bestehen sollen, ankündigen (›Bindung der Ethik an Prinzipien‹):

Merck ist seit Jahrhunderten bestrebt, nach ethischen Grundsätzen und Werten zu handeln. Alle Arbeitnehmer sollen fair und unter Beachtung lokaler Gesetze und Richtlinien behandelt werden. (Merck GB 2010)

Auffallend ist in solchen Aussagen die Hinzufügung des Superlativs *höchste*\* in Verbindung mit *ethische\* Standards*, was zwar ein diskurstypisches Bewertungsmuster ist (→ 8.3.1.2), in diesen Aussagen jedoch theoretisch semantisch ungültig ist, da *ethisch*\* nicht mehr steigerbar ist:

Die Daimler AG ist entschlossen, in ihren geschäftlichen Transaktionen höchste ethische Standards zu erreichen. (Daimler Verhaltensrichtlinien)

Die Unternehmen scheinen sich dabei jedoch praktisch an das Quantitätsprinzip anzulehnen (›Quantität als Legitimationsquelle‹) oder sie gehen davon aus, dass es viele ethische Regularien gibt, von denen sie nicht alle einhalten (können oder wollen). Auch HENKEL nutzt im Folgenden den Superlativ in der englischen Variante (*Most Ethical Companies*) und fügt inhaltlich durch *Ranking* das Konzept ›ethische Prinzipien folgen der ökonomischen Regel des Maximierens‹ hinzu:

Und auch mit der Aufnahme in das Ranking der „World's Most Ethical Companies“ von Ethisphere Institute und „Forbes Business Magazine“ wurde Henkel wieder ausgezeichnet. (Henkel GB 2010)

Ebenfalls das *ethische Profil* dient der unverkennbaren Einordnung in den Diskursbereich WIRTSCHAFT und wird gezielt als Erfolgsfaktor eingesetzt (vgl. Böhm 2010):

Die Allianz berücksichtigt zunehmend Nachhaltigkeitskriterien: bei der Vermögensverwaltung: durch Bewertung ökologischer, sozialer und ethischer Aspekte ihrer Investitionstätigkeit und durch Berichterstattung über das ökologische, soziale sowie ethische Profil ihrer Anlagen. (Allianz Grundsätze nachhaltiger Entwicklung)

Ein weiteres musterhaftes Syntagma, *ethischer Kompass*, das als Metapher verstanden werden kann, verweist jedoch auch darauf, dass ein Bedarf an ethischer Direktion vorhanden zu sein scheint:

Auf Basis der sieben Konzernwerte hat Deutsche Post DHL einen Verhaltenskodex erarbeitet, der seit Mitte 2006 in allen Regionen und Unternehmensbereichen gültig ist. Als „ethischer Kompass“ sind in diesem „Code of Conduct“ die Leitlinien für das tägliche Verhalten im Arbeitsalltag der etwa 470.000 Mitarbeiter festgeschrieben. Respekt, Toleranz, Ehrlichkeit und Offenheit sowie Integrität gegenüber Mitarbeitern und Kunden sowie die Bereitschaft zur Übernahme von gesellschaftlicher Verantwortung sind die Grundpfeiler des Verhaltenskodex. (Deutsche Post Werte und Kultur)

Die ETHIK ist somit der KOMPASS für das Unternehmenshandeln, da sich Unternehmen mit *ethischen Herausforderungen* konfrontiert sehen.<sup>53</sup>

---

<sup>53</sup> Vgl. dazu: „Tierversuche nutzen wir zur Zulassung von neuen Produkten und Therapieformen, soweit diese vom Gesetzgeber vorgeschrieben sind. Diese Untersuchungen werden ausschließlich von externen Forschungseinrichtungen in anerkannten Versuchslaboren durchgeführt und grundsätzlich durch eine Ethikkommission für Tierversuche gebilligt.“ (FMC GB 2010).



Ziel der Leitlinien ist es, allen Mitarbeitern bei rechtlichen und ethischen Herausforderungen eine Entscheidungshilfe an die Hand zu geben und richtiges Verhalten zu fördern. (MAN Unternehmensleitbild)

Dieser Beleg von MAN zeigt ebenso die serielle Verknüpfung von ETHIK mit RECHT; weitere Syntagmen unterstreichen das damit evozierte Konzept ›Korrelation von Ethik und Recht‹:

Anspruch von Henkel ist es, alle Geschäfte in ethisch und rechtlich einwandfreier Weise zu tätigen. Daher erwartet Henkel von allen Mitarbeiterinnen und Mitarbeitern, dass sie neben den internen Regeln alle relevanten Gesetze befolgen, Interessenkonflikte vermeiden, die Vermögenswerte von Henkel schützen sowie die Sitten, Traditionen und gesellschaftlichen Werte der Länder und Kulturkreise, in denen Henkel Geschäfte tätigt, berücksichtigen. (Henkel GB 2010)

HENKELS Aussage, *alle Geschäfte in ethisch und rechtlich einwandfreier Weise zu tätigen*, greift dabei nochmals konkret das Konzept ›ethisches Handeln‹ auf, das durch ‚einwandfrei‘ qualifiziert wird. ›Ethisches Handeln‹ binden auch andere Unternehmen direkt an ihre ›Identitätsrolle‹ (*als ethisch handelndes Unternehmen*) zurück:

Wir arbeiten nachhaltig und stellen uns unserer Verantwortung als sozial und ethisch handelndes Unternehmen. (Bayer Namen.Zahlen.Fakten 2010/2011)

Naturgemäß sind in diesem Diskurs ökonomische Ziele vorrangig, da es um wirtschaftliche Akteure geht, die aufgrund ihrer Fachkenntnisse bereits gewisse (ethische) Forderungen ausschließen. Dennoch belegen die Beispiele, dass ‚ökonomische‘ und ‚ethische‘ ZIELE gekoppelt werden, obwohl diese teilweise einander entgegenlaufen und Zielkonflikte ergeben. K+S greift diese Problematik metareflektierend auf:

Alle teilnehmenden Unternehmen bekennen sich mit dem Leitbild nicht nur zu verantwortlichem unternehmerischen Handeln, sondern beziehen auch konkret Stellung zu den Herausforderungen und Widersprüchen, die sich im marktwirtschaftlichen Wettbewerb immer wieder ergeben. Damit soll der gesellschaftliche Diskurs auf eine realistische, am Unternehmensalltag orientierte Ebene gebracht werden, die ethische Wertvorstellungen und Fakten gleichermaßen berücksichtigt. (K+S GB 2010)

In diesem Beleg wird der Maximenkonflikt durch *Herausforderungen und Widersprüchen* unterschwellig angedeutet; zudem wird präsupponiert, dass ETHISCHE WERTVORSTELLUNGEN *keine* FAKTEN sind. Gleichwohl offenbart der Beleg eine Deontik durch das Konzept ›Unternehmenshandeln folgt ethischen Grundsätzen‹, was jedoch nicht als derzeitige Wirklichkeit von K+S markiert wird (*soll [...] gebracht werden*).<sup>54</sup> Dass die Zuschreibung einer ETHIK an UNTERNEHMEN in Bezug auf UNTERNEHMENSIDENTITÄT weiter ausgebaut wird, veranschaulichen die folgenden Kapitel.

---

<sup>54</sup> Vgl. dazu ausführlich Pieper (1992, 86), die drei systematische Ansätze zum Verhältnis von ETHIK und ÖKONOMIE anführt: „(1) Moralität und Wirtschaftlichkeit sind zwei Aspekte ein und derselben Handlungsstruktur; (2) Moralische Handlungen und wirtschaftliche Handlungen bilden zwei voneinander getrennte, selbständige Klassen von Handlungen, die unabhängig voneinander untersucht werden können; (3) Wirtschaftliche Handlungen bilden eine eigene Klasse von Handlungen, die aber gleichwohl dem Prinzip der Moralität verpflichtet sind.“ Für (2) sind keine Belege im Korpus auffindbar.

### 1.2.2.1.1 INTEGRITÄT

INTEGRITÄT taucht als Sachverhalt (mittels des Substantivs *Integrität*) meist in Verknüpfung mit WERTE (→ 9.2.5.1) auf. Insbesondere bei DAIMLER und SIEMENS findet INTEGRITÄT Beachtung.<sup>55</sup> Die Belege offenbaren, dass *Integrität* (*Integrity*) in Aussagen (im Kontext von \*werten und \*prinzipien) meist strukturell zu Beginn aufgeführt wird:

Unsere Grundprinzipien: Integrität. (Linde Der Linde Spirit)

Dass durch diese Erstnennung das Konzept ›Integrität als wichtigste Unternehmenseigenschaft‹ zugrunde gelegt wird, bestätigt sich auch auf der Textebene, da der Ausdruck *Integrität* durch einen anschließenden Punkt als satzwertige Aussage gekennzeichnet und textuell ausgeführt wird:

Integrität. Wir handeln im Einklang mit den Gesetzen der Länder, in denen wir tätig sind. Wir achten die Regeln des freien Wettbewerbs. Korruption in jeder Form wird von uns nicht toleriert. Wir vermeiden Interessenkollisionen und schützen Firmeneigentum gegen jedweden Missbrauch. (K+S Grundwerte)

Integrität. Wir sind aufrichtig und ehrlich. Wir folgen den Gesetzen und handeln nach ethischen Grundsätzen. Wir kommen unseren Verpflichtungen nach und übernehmen persönlich Verantwortung für unser Handeln. (E.ON Unsere Werte)

Ebenfalls dient die Fettsetzung im Text der Hervorhebung des Sachverhalts INTEGRITÄT. Die TELEKOM nutzt dazu auch die Initialisierung durch den Buchstaben I:

I – Integrität: „Wir kommunizieren offen und ehrlich und halten, was wir versprechen.“ (Telekom T-Spirit – Das Leitbild der Deutschen Telekom)

Durch diese gezeigten Konstruktionen wird zugleich eine Bedeutungsfixierung von ›Integrität‹ vorgenommen (und damit auch ein Sachverhaltsfixierungsversuch, der unter die Sachverhaltsfestsetzung fällt → 8.2). Bedeutungsfixierungsversuche werden auch mittels assertiver Aussagen eingeleitet:

Integrität ist eine Voraussetzung für die Reputation und den wirtschaftlichen Erfolg eines global tätigen Konzerns, der im Fokus der Öffentlichkeit steht. Ein wesentliches Element von Integrität ist korrektes Verhalten im täglichen Geschäftsbetrieb und im Unternehmensalltag. (Daimler Verhaltensrichtlinien)

DAIMLER liefert hierbei diverse ›Integritätselemente‹ (,korrektes Verhalten im Geschäftsalltag‘) und ›Integritätsziele‹ (,Unternehmensreputation‘, ,wirtschaftlicher Erfolg‘). SIEMENS leitet einen Bedeutungsfixierungsversuch metasprachlich mittels *verstehen* ein:

Unsere Entscheidungen und unser Verhalten müssen stets moralischen Grundsätzen und unseren Unternehmenswerten entsprechen. Das verstehen wir unter Integrität. (Siemens GB 2010)

SIEMENS markiert in diesem Beleg als konkrete ›Integritätselemente‹ ,Bindung von Entscheidung und Verhalten an Moral‘ sowie ,Bindung von Entscheidung und Verhalten an Unternehmenswerte‘.<sup>56</sup> Auch Komposita dienen SIEMENS als Sachverhaltsfestsetzungsversuche, indem beispielsweise die ausdrucksseitige Fixierung von IDENTITÄT durch das Kompositum

<sup>55</sup> Vgl. dazu Isaksson/Jørgensen (2010, 230), die *Integrity/Justice* als höchsten Appell im Ethos-Modell nennen.

<sup>56</sup> Weitere Attribute lauten ,Bindung an Recht‘, ,Bindung an Fairness‘ sowie ,Bindung an Ehrlichkeit‘.

*Siemens-Integritätsinitiative*<sup>57</sup> verwendet wird. Innerhalb der Syntagmen zeigt sich die Kookkurrenz von *Integrität* mit *Respekt* und *Recht* (>Korrelation von Integrität und X<, z. B. ‚Respekt‘), wobei RECHT auch in enger Verbindung zu ETHIK aufgefunden wurde (→ 9.2.2.1):

Das neue Vorstandsressort »Integrität und Recht« hat die Aufgabe, für die Einhaltung von Regeln und Vorschriften und höchste ethische Standards zu sorgen. (Daimler GB 2010)

Während von DAIMLER eine klare >Integritätsinstanz< (*Vorstandsressort »Integrität und Recht«*) evoziert wird, wird in anderen Beispielen das Adjektiv *integer/integre\** genutzt, das die Konzepte >Integritätshandlung< und >Integritätsadressaten< mitanschließt. Der ‚integre Umgang‘ mit ‚Kunden‘/‚Mitarbeiter‘ steht dabei im Vordergrund. Des Weiteren werden durch die Konstruktion *integre\** + Substantiv auch >Integritätsträger< offenbar:

Börsen sorgen für sichere und integre Märkte. (Deutsche Börse GB 2010)

Eine integre Geschäftspraxis und nachhaltiges Wachstum sind eng verbunden, denn Wertgemeinschaften sind auf Dauer auch Wertschöpfungsgemeinschaften. (Daimler Das Unternehmen 2011)

Bei der Durchsicht dieser Belege fällt – als lexikalische Variante – auch die Metapher *saubere Geschäfte* für >Integritätsträger< auf:

MAN steht kompromisslos für saubere Geschäfte, denn wir können nur erfolgreich sein, wenn wir durch Qualität und Leistung überzeugen. (MAN GB 2010)

Bei DAIMLER wird die Metapher *sauber* auch auf der Text-Bild-Ebene aufgegriffen (durch den Bildinhalt */Autosäubern/*) und im Bildtitel der Fotografie mit dem Ausdruck *Integrität* verknüpft:

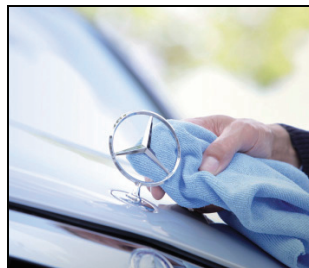

Abbildung 85 - Wir sind ehrlich, fair und vertrauenswürdig. Integrität ist einer unserer vier Unternehmenswerte. (Daimler Das Unternehmen 2011)

In dieser Konstruktion werden nicht nur *sauber* und *Integrität* miteinander verbunden, sondern der Sachverhalt INTEGRITÄT durch EHRlichkeit, FAIRNESS und VERTRAUEN spezifiziert (*ehrllich, fair und vertrauenswürdig*) (= >Integritätsteile<). Der Bildinhalt */Autosäubern/* kann jedoch auch (durch den */Mercedes-Stern/*) als Metonymie für *Image-Pflege* (→ 9.1.7) gelesen werden, was eher eine negative Konnotation auslösen würde. In diesem Zusammenhang ist es

---

<sup>57</sup> Vgl. dazu: „Unsere Collective-Action-Bemühungen und unsere Siemens-Integritätsinitiative (*Siemens Integrity Initiative*), die Organisationen und Projekte unterstützt, die sich dem Kampf gegen Korruption und Betrug auf der Basis gemeinsamen Handelns, Aufklärungsarbeit und Schulungen verschrieben haben, sind Beispiele für unseren kontinuierlichen Einsatz zur Bekämpfung von Korruption auf unseren Märkten.“ (Siemens GB 2010).

auch aufschlussreich, inwieweit ›Integritätsrisiken‹ verbalisiert werden. Dies geschieht insgesamt nur in wenigen Beispielen auf textueller Ebene, wobei SIEMENS ausführlich ‚Korruption‘ beschreibt:

Mit Korruption untergraben Unternehmen ihre Integrität, und sie schwächen ihre Wettbewerbsfähigkeit an einer entscheidenden Stelle. (Siemens GB 2010)

*Korruption* wird in diesem Beispiel von SIEMENS jedoch nicht nur als ‚integritätsbedrohend‘, sondern vor allem als ‚wettbewerbsschädigend‘ (*Wettbewerbsfähigkeit*) gesehen. Dieses ökonomische Motiv wird weiter ausgeführt und endet im Appell *Kampf gegen Korruption*.<sup>58</sup> Auch BASF untergliedert den *Grundwert Integrität* in einzelne konkrete *Richtlinien operativen Handelns*, in denen ebenso explizit auf ›Integritätsrisiken‹ eingegangen wird (‚ungesetzliche sowie rechtlich zweifelhafte Handlungen‘):

[...] Wir verurteilen jegliche Form von Kinderarbeit sowie von Zwangs- oder Pflichtarbeit. [...] Jeder Mitarbeiter hat auf der Grundlage des jeweiligen Compliance-Programms die Gelegenheit, sich in vertraulicher Weise Rat und Hilfe zu holen, wenn sich in seinem Arbeitsumfeld Hinweise auf rechtlich zweifelhafte Vorgänge ergeben. (BASF Vision.Grundwerte.Leitlinien)

In diesem Text zeigt sich wiederum stark die ›Korrelation von Integrität und X‹ ‚Recht‘.<sup>59</sup> Analysiert man schließlich die Aussagen zu INTEGRITÄT auf der Textebene, wirken die meisten Ausführungen abstrakt und nicht verpflichtend:

#### INTEGRITY

- Vorbild sein
- Gesetze, Richtlinien und Regeln einhalten
- Anderen vertrauen und vertrauensvolle Beziehungen aufbauen
- Ehrlich und zuverlässig sein
- Aufmerksam zuhören und angemessen kommunizieren
- Nachhaltig handeln: kurzfristige Ergebnisse mit langfristigen Anforderungen in Einklang bringen
- Menschen und Umwelt schützen, Sicherheit gewährleisten. (Bayer Leitbild)

INTEGRITÄT bleibt somit als Sachverhalt in seiner Bedeutung eher vage und stellt vielfach Bezüge zu anderen Sachverhalten im unternehmerischen Alltag her (RECHT, EHRLICHKEIT, FAIRNESS und RESPEKT). Neben der angemessenen Berücksichtigung moralischer Normen wird dabei besonders der Aspekt der Legalität dominant gesetzt (›Korrelation von Integrität und X‹ ‚Recht‘), wodurch das zugrunde gelegte Konzept ›Integrität‹ in Bedeutungsnahe zu ‚moralischem Recht‘ kommt (vgl. Isaksson/Jørgensen 2010, 230ff.). INTEGRITÄT steht damit stellvertretend für die Authentizität von Inhalten bzw. des gesamten Unternehmenshandelns (und damit auch für die Wahrhaftigkeit von UNTERNEHMENSIDENTITÄT).

---

<sup>58</sup> Vgl. dazu: „Um [...] Fortschritte zu erreichen, bedarf es des gemeinsamen Handelns aller oder zumindest möglichst vieler Marktteilnehmer und Stakeholder. Daher engagiert sich Siemens mit Collective Action über die Grenzen des eigenen Unternehmens hinaus für den Kampf gegen Korruption.“ (Siemens GB 2010).

<sup>59</sup> Während die ›Freiwilligkeit der Sanktion von nicht integrem Verhalten‹ in manchen Belegen betont wird, verweisen andere Beispiele auf ›notwendige Sanktionen von nicht integrem Verhalten‹: „Dabei [im Wettbewerb, S.B.] werden Verstöße gegen Gesetze und Richtlinien nicht geduldet und konsequent verfolgt.“ (MAN GB 2010).

### 1.2.2.1.2 EHRlichkeit

EHRlichkeit wird auf der Sprachoberfläche meist durch adjektivische (*ehrlich\**) Reihungen eingeführt und direkt mit den Sachverhalten INTEGRITÄT, ETHIK oder FAIRNESS verbunden:

Wir handeln moralisch, ehrlich und fair. (Linde Der Linde Spirit)

In diesen Reihungen (und damit auch Verknüpfungen) verschiedener VERHALTENSEIGENSCHAFTEN finden sich neben den sprachlichen Repräsentation durch *moralisch\**, *ehrlich\** und *fair\** auch Adjektive wie *zuverlässig\**, *aufrichtig\**, *offen\** oder *vertrauenswürdig\**. Betrachtet man die syntagmatische Ebene, wird EHRlichkeit meist mittels Verbphrasen (*ehrlich + handeln* und *ehrlich + sein*) prädiziert:

Wir sind aufrichtig und ehrlich. Wir folgen den Gesetzen und handeln nach ethischen Grundsätzen. Wir kommen unseren Verpflichtungen nach und übernehmen persönlich Verantwortung für unser Handeln. (E.ON Unsere Werte)

Aus der Belegdurchsicht lassen sich folgende Konzepte ableiten: ›Ehrlichkeitsträger‹ sind ‚Gesetzestreue‘ sowie ‚transparente Sachverhaltsdarstellung‘. Dabei präsentieren die Aussagen durch die Nutzung des Indikativ Präsens (*wir sind*) EHRlichkeit als Tatsache.<sup>60</sup> Ferner taucht das Adjektiv *ehrlich\** auch als Attribut in Syntagmen mit Substantiven wie *Kommunikation*, *Austausch* oder *Dialog* (›Ehrlichkeitsträger‹ ‚Interaktion‘) auf:

Respekt verlangt eine offene und ehrliche Kommunikation. (Merck Merck Werte)

Wertet man das Substantiv *Ehrlichkeit\** aus, erscheint dieses meist in Reihungen mit anderen Hochwertwörtern und bestätigt die bereits angeführten Konzepte bzw. Konzeptattribute:

Infineon-Mitarbeiter und Führungskräfte fühlen sich den gleichen Werten und Prinzipien verpflichtet. Ehrlichkeit, Offenheit und Verlässlichkeit im Umgang miteinander stehen dabei an oberster Stelle. (Infineon Unser Infineon Team)

Aufschlussreich sind jedoch auch adjektivische Synonyme zu *ehrlich\**, die entweder als prädikatives oder attributives Adjektiv gebraucht werden, z.B. *wahrheitsgetreu\**, *richtig\** und *glaubwürdig\**:

Zu den Grundsätzen von Merck zählt die sachlich richtige, umfassende und faire Informationsversorgung. (Merck GB 2010)

In diesen Belegen liegt der Fokus besonders auf dem Konzept ›Ehrlichkeitsträger‹ ‚Interaktion‘. Unternehmen können durch EHRliche Informationsdarstellung zwar auf Glaubwürdigkeit bzw. Akzeptanz abzielen, diese aber nicht garantieren. Auch auf der Textebene fielen Beispiele von RWE auf, wobei stark mit dem Dualismus EHRliche Informationsdarstellung vs. GERÜCHTE gearbeitet wurde (→ 8.4.3.2).<sup>61</sup> Rezipienten können den Wahr-

---

<sup>60</sup> Vgl. dagegen: „Wir wollen ehrlich und konstruktiv miteinander umgehen.“ (Merck Leitbild).

<sup>61</sup> Isaksson/Jørgensen (2010, 230) eruieren im Branchenvergleich, dass Energieunternehmen hohe Werte bei *Integrity* und *Truthfulness* besitzen. Kläßen (1999, 204) erklärt diese Fokussierung der Energieunternehmen dahingehend, dass gerade in diesem Bereich gerechtfertigte Emotionen und Ängste in Bezug auf Umwelt, Sicherheit und Folgenabschätzung bei Rezipienten bestehen, denen entgegengewirkt werden muss.

heitswert der Aussagen jedoch nicht selbst überprüfen. Idealerweise wird die postulierte EHRlichkeit (und damit das Merkmal ‚wahr‘) dennoch auf UNTERNEHMENSIDENTITÄT semantisch übertragen, was Textproduzenten durch solche lexikalischen Trigger häufig bewusst einkalkulieren (vgl. Kläßen 1999, 146).

### 1.2.2.1.3 RESPEKT

Ein ähnlicher Sprachgebrauch wie bei INTEGRITÄT und EHRlichkeit lässt sich bei RESPEKT beobachten. Der Ausdruck *Respekt* tritt beständig in Verbindung mit *Integrität* sowie in Sprachhandlungen der Sachverhaltsfestsetzung (Bedeutungsfixierungsversuche) auf:

R – Respekt: „Wir nutzen unsere kulturelle Vielfalt, respektieren und unterstützen uns.“ (Telekom T-Spirit – Das Leitbild der Deutschen Telekom)

LINDE formuliert dabei deontisch mittels *sollte* und generisch durch *Mensch*:

Respekt. Jeder Mensch sollte mit Respekt behandelt werden. (Linde Der Linde Spirit)

BASF unterfüttert den *Grundwert Respekt* (wie *Integrität*) mit konkretisierten Handlungsanweisungen. Neben dem Substantiv *Respekt* erscheint im Kontext auch *respektvoll*:

Grundwert Respekt: Wir gehen fair und respektvoll miteinander um. Wir suchen den offenen, vertrauensvollen Dialog im Unternehmen, mit unseren Geschäftspartnern und relevanten gesellschaftlichen Gruppen.

- Unsere Kommunikation im Unternehmen, mit unseren Geschäftspartnern, Nachbarn und gesellschaftlich relevanten Meinungsbildnern ist durch einen offenen und sachlichen Dialog geprägt.
- [...]. (BASF Vision.Grundwerte.Leitlinien)

›Respekt‹, so zeichnen es die Belege, evoziert im Gegensatz zu ›Integrität‹ seltener ein ‚moralisches Recht‘, sondern eher ein ‚menschliches Anrecht‘. Diese Konzeptualisierung wird bei MERCK durch einen intertextuellen Bezug auf das *Grundgesetz* aufgenommen, wodurch der konstituierte RESPEKT gleichsam ‚unangreifbar‘ wird:

- Respekt basiert auf dem Bild vom Menschen und seiner Würde.
- Respekt erzeugt ein Klima der Achtung, der Fairness und der Anerkennung.
- [...]. (Merck Merck Werte)

RESPEKT wird in diesem Sachverhaltsfestsetzungsversuch von MERCK mittels ›Respektziele‹ (u.a. ‚Anerkennung‘, ‚Fairness‘) und ›Respektvoraussetzungen‹ (u.a. ‚Achtung der menschlichen Würde‘) konstituiert. Auch bei HENKEL wird die Bedeutung des Konzeptes ›Respekt‹ mithilfe des Attributs ‚menschliches Anrecht‘ begründet:

Der Wert ‚Mitarbeiter‘ unterstützt das grundlegende menschliche Bedürfnis nach Respekt, nach Anerkennung und Belohnung für hervorragende Leistung, nach Unterstützung durch die Kollegen sowie den Wunsch, Teil eines erfolgreichen Teams zu sein. (Henkel GB 2010)

Durch die Verwendung von *Mitarbeiter* und *Kollegen* im Kontext des Belegs steht RESPEKT damit auch für das Merkmal ‚Nähe‘ und in Distanz zur Anonymität in Großkonzernen (vgl. Frauenholz 2009, 116). RESPEKT scheint somit vor allem psycho-sozialen Normen zu dienen, die UNTERNEHMENSIDENTITÄT erfüllen muss.



#### 1.2.2.1.4 FAIRNESS

FAIRNESS tritt häufig in Verbindung mit INTEGRITÄT und RESPEKT auf, jedoch – quantitativ gesehen – insgesamt in geringerer Anzahl der Bezugnahmen. Ebenfalls findet sich das Substantiv *Fairness* fortwährend in substantivischen Reihungen unter Begleitung anderer Hochwertwörter:

Partnerschaftliche Zusammenarbeit | „Vertrauen und Fairness“ (HeidelbergCement Unser Unternehmensleitbild)

HEIDELBERGCEMENT führt in diesem Beleg jedoch die Bedeutung von *Fairness* bzw. dessen Bezugskorrelation nicht näher aus. Bei LINDE dagegen offenbart sich das Konzept ›Fairnessvoraussetzungen‹ (,Respekt‘):

Respekt erzeugt ein Klima der Achtung, der Fairness und der Anerkennung. (Linde Der Linde Spirit)

K+S geht explizit auf ›Fairnessadressaten‹ ein:

Respekt und Fairness im Umgang mit Geschäftspartnern und Mitarbeitern. Unseren Geschäftspartnern begegnen wir als faire Vertragspartner. (K+S Grundwerte)

Durch *faire Vertragspartner* wird K+S zudem die Rolle ›Fairnessträger‹ zugeschrieben. Weitere Belege bestätigen diese Selbstzuschreibung der Unternehmen durch das Adjektiv *fair*\* (oft in Kookkurrenz mit *transparent*\*), das auffallend häufig auftaucht (267x), wenn man die Verbindungen *Fair Labor* und *Fair Value* miteinbezieht. Das Kovorkommen von *fair*\* und *\*partner* bestätigen auch andere Belege, was somit eine Verbindung von FAIRNESS und PARTNER(-SCHAFT) anzeigt, welche die untersuchten Unternehmen anstreben. Weitere ›Fairnessträger‹ sind ,unternehmerische Handeln‘, ,Interaktion‘, ,Information‘ sowie ,Wettbewerb‘:

Basierend auf unseren Werten und unserer langjährigen erfolgreichen Geschichte verfolgen wir eine langfristig ausgerichtete Unternehmensentwicklung, die durch fairen unternehmerischen Handeln und eine solide Finanzierung geprägt ist. (Henkel Vision und Werte)

Ein fairen Miteinander von Unternehmensleitung, Mitarbeitern und Arbeitnehmervertretungen spielt eine zentrale Rolle bei Siemens. (Siemens GB 2010)

Diese Aussagen weisen, wie vor allem das Beispiel von BASF zeigt, ebenfalls eine starke Verknüpfung zum Sachverhalt RECHT auf (›Korrelation von Fairness und X‹ ,Recht‘), wodurch FAIRNESS ebenfalls (wie INTEGRITÄT) innerhalb eines rechtlichen Deutungsrahmens konstituiert wird.

#### 1.2.2.1.5 Fazit: ETHIK

Die letzten Kapitel veranschaulichten, dass der Sachverhalt ETHIK durch INTEGRITÄT, EHRlichkeit, RESPEKT und FAIRNESS aufgebaut wird und Letztere in enger Verbindung zueinander stehen, was nicht nur durch die seriellen Reihungen auf der Sprachoberfläche (durch Kommata oder *und*) angezeigt wird (z.B. *moralisch, ehrlich und fair*). Aufgrund dieser Art von Konstruktionsmustern, die tautologisch wirken, sind jedoch semantisch zahlreiche nur

spärliche Differenzierungen der einzelnen VERHALTENSEIGENSCHAFTEN zu erkennen. Strukturell wird in solchen lokalen Sequenzierungen der informative Charakter der Aussagen zugunsten eines „Geredes“ (Stockinger 1998, 22) aufgegeben. Diese Reihungen erfüllen zwar die Realisierung der Funktion der positiven Selbstdarstellung sowie das Prinzip ›Quantität als Legitimationsquelle‹; dennoch läuft diese Darstellung einer inhaltsorientierten Sequenzierung entgegen, die ein differenziertes Bild des zugeschriebenen Selbst (d.h. des Sachverhalts UNTERNEHMENSIDENTITÄT) ergäbe.

### 1.2.2.2 VERTRAUEN

*Vertrauen* scheint ein weiterer Standardfüller des Konzeptes ›Unternehmenseigenschaften‹ zu sein, während in der Analyse von Komposita mit *Vertrauen*\* auch ökonomische Konzepte sprachlich realisiert werden (z.B. durch *Vertrauenskapital* oder *Vertrauensarbeitszeit*). VERTRAUEN wird im Korpus zahlreich versprachlicht<sup>62</sup> (\**vertrauen*\* besitzt 278 Hits), wobei dies meist in Form des Hochwertwortes *Vertrauen* innerhalb substantivischer Reihungen mit anderen Hochwertwörtern oder in Form des Adjektivs *vertrauensvoll* geschieht. Strukturell werden beim Substantiv *Vertrauen*\* ebenso sequentielle Reihungen der Form *X, Vertrauen, Y* oder *X und Vertrauen* bevorzugt. Dabei umgeben die Hochwertwörter *Sicherheit, Respekt, Fairness, Offenheit* und *Zuverlässigkeit* (X)<sup>63</sup> das Lexem *Vertrauen* besonders häufig (›Korrelation von *Vertrauen* und X‹):

Wichtig ist uns dabei, unseren Kunden ein Höchstmaß an Vertrauen und Sicherheit bezüglich der Konformität unserer Produkte zu vermitteln. (Infineon GB 2010)

Respekt, Vertrauen, Fairness. Wir begegnen einander mit Respekt. Führung basiert auf gegenseitigem Vertrauen, Vertrauen basiert auf Berechenbarkeit und Fairness. (BMW GB 2010)

Mittels Attributionen durch Adjektive kann *Vertrauen* auf der Syntagmenebene in weiteren Bindungsaffinitäten analysiert werden. Neben den diskurstypischen evaluativen Adjektiven wie *groß\**, *hohe\** sowie der Superlativform *höchste\** + *Vertrauen*, die seriell auftreten, findet sich als Verweis auf das Konzept ›Vertrauensart‹ auch *gegenseitig\** + *Vertrauen*, was die Reziprozität von VERTRAUEN unterstreicht:

Auf Vertrauen und Feedback bauen: Unser Erfolg basiert auf gegenseitigem Vertrauen, Fairness, Integrität und einer klaren und offenen Kommunikation. (Allianz Kultur und Werte)

---

<sup>62</sup> Ebenfalls Reichertz (2002, 16ff.) sowie Keller (2006b, 13ff.) nennen Vertrauen als zentrale Kategorie der Unternehmenskommunikation.

<sup>63</sup> Vgl. dazu: „VERTRAUEN, QUALITÄT, SICHERHEIT: DER WERT EINER STARKEN MARKE IST UNBEZÄHLBAR.“ (Merck Einzigartig – Der Merck Weg); „Wir sind teamorientiert, konstruktiv, offen und kooperativ, unsere Zusammenarbeit basiert auf Respekt und Vertrauen.“ (ThyssenKrupp Unsere Werte); „Vertrauen und Offenheit sind die Grundlage unserer Unternehmens- und Finanzkommunikation.“ (MAN Unternehmensleitbild); „Mit unserer Kreativität und unserem Engagement tragen wir täglich dazu bei, eine Unternehmenskultur zu etablieren, die von Offenheit, Vertrauen und gegenseitigem Respekt geprägt ist.“ (Deutsche Post Werte und Kultur).

Adjektivisch wird der Sachverhalt VERTRAUEN durch *vertrauensvoll*\* ausgedrückt, was vorrangig in Verbindung mit den Substantiven *\*beziehungen*, *\*verhältnis* und *Atmosphäre* auftritt, wodurch ›Vertrauenszustände‹ angezeigt werden:

Weltweit übernehmen wir Risiken unterschiedlichster Komplexität und Ausprägung. Erfahrung, Finanzkraft, Effizienz und ein erstklassiger Service machen uns zum ersten Ansprechpartner in allen Fragen rund ums Risiko. Dabei legen wir höchsten Wert auf ein enges und vertrauensvolles Verhältnis zu unseren Kunden. (Munich Re Über Munich Re)

Aus dem Kontext lassen sich daneben die ›Vertrauensgeber‹ ‚Kunden‘ (und oftmals auch ‚Mitarbeiter‘) erschließen. Klaußen (1999, 131) sieht die Vertrauensbildung bei Mitarbeitern als eine dominante Größe in Unternehmen an. Weitere musterhafte Syntagmen sind *vertrauensvolle Beziehungen* und *vertrauensvolle Partnerschaft*\*:

Langfristige und vertrauensvolle Partnerschaft ist ein wesentliches Element der erfolgreichen Zusammenarbeit von ThyssenKrupp mit unterschiedlichen gesellschaftlichen Gruppen. (ThyssenKrupp GB 2010)

THYSSENKRUPP spricht dabei ebenfalls die ›Vertrauensgeber‹ (‚gesellschaftliche Gruppen‘) an. Als ›Vertrauensträger‹, d.h. wem die Anspruchsgruppen ihr VERTRAUEN zukommen lassen, wird meist das ‚Unternehmen‘ implizit eingesetzt. Dass das UNTERNEHMEN dessen auch *würdig* ist, wird durch das Adjektiv *vertrauenswürdig* präsupponiert, das E.ON beispielsweise an sich *selbst* (an die metonymische *wir*-Gruppe) zurückbindet:

Wir gehen fair und anständig miteinander um. Wir vertrauen unseren Kollegen und verhalten uns selbst vertrauenswürdig. (E.ON Unsere Werte)

Dass das ‚Unternehmen‘ als ›Vertrauensträger‹ präsupponiert wird, offenbart sich auch durch das Possessivpronomen im Syntagma *Vertrauen unserer X*, wobei *X* die genannten ›Vertrauensgeber‹ wiederum versprachlicht:

Unser größter Gewinn ist das Vertrauen unserer Kunden. (Commerzbank Die Marke der neuen Commerzbank)

Besonders häufig wird in dieser Konstruktion das Konzeptattribut ‚Investoren‘ evoziert:

Dank des Vertrauens unserer Investoren halten wir den Kurs. (E.ON Cleaner and better energy)

Eine weitere Form, ›Vertrauensgeber‹ zu versprachlichen, geschieht durch das Syntagma *Vertrauen von X*:

In der aktuellen Debatte über gesellschaftliche Unternehmensverantwortung und nachhaltiges Wirtschaften kommt dem Vertrauen von Anlegern eine besondere Bedeutung zu. (Deutsche Börse Standpunkte)

Als nächstes wird die Satzebene betrachtet. Dabei sind diejenigen Verben aufschlussreich, mit denen *Vertrauen* attribuiert wird (›Vertrauenshandlung‹). Als markante Konstellationen zeigt sich *Vertrauen* in Kombination mit *schaffen* (‚Vertrauensschaffung‘):

Qualität schafft Vertrauen. (Linde GB 2010)

Der Großteil der Belege argumentiert monokausal durch den Schluss ›X schafft Vertrauen‹ (z.B. ‚Beratung‘, ‚Qualität‘, ‚Marken‘) und offenbart, dass die ‚Vertrauensschaffung‘ (ungeachtet durch was und bei wem) ein zentraler Handlungsmechanismus bei Unternehmen ist.

VERTRAUEN wird dadurch als Zielzustand der ›Vertrauenshandlung‹ konzeptualisiert, was durch aktives Zutun (›Vertrauensschaffung‹) eines Unternehmens erreichbar ist. Diese Konzeptualisierung unterstreichen auch *zu*-Infinitive und Modalverben:

Der Dialog mit unseren Kunden trägt dazu bei, Vertrauen zu schaffen und zu sichern. (K+S GB 2010)

Henkel will [...] Nähe und Vertrauen schaffen, will die Distanz überwinden, die gegenüber Großunternehmen oft empfunden wird. (Henkel Corporate Identity)

Auffällig ist in der Belegauswertung zu ›Vertrauensschaffung‹ jedoch, dass kaum (personalen) Entitäten, bei denen VERTRAUEN hergestellt werden soll (›Vertrauensadressaten‹), direkt versprachlicht werden. Die Belege deuten dagegen darauf hin, dass VERTRAUEN schon ex ante existiert, ohne in Kontakt mit PERSONEN zu kommen. Dieser Befund zeigte sich bereits beim Sachverhalt AFFEKTE/EMOTIONEN (→ 9.2.1) und spiegelt die starke *Output*-Orientierung der ökonomischen Logik wider. Seltene Aussagen sind somit:

Offene und transparente Kommunikation ist unser oberstes Gebot im regelmäßigen Dialog mit allen Stakeholdern. Damit schaffen wir die wesentlichen Voraussetzungen für das Vertrauen, das Lufthansa bei ihren Kapitalgebern, Mitarbeitern und in der Öffentlichkeit genießt. (Lufthansa GB 2010)

Ein zweites Verb, das häufig im Kontext von *Vertrauen* (und *schaffen*) auftritt, präsentiert der Beleg von LUFTHANSA ebenfalls; es handelt sich um *genießen*:

Unsere Marken genießen weltweit ein großes Vertrauen, allen voran NIVEA, La Prairie und Eucerin. (BDF Unser Profil)

Der Beleg von BEIERSDORF besitzt weder einen Verweis auf ›Vertrauensgeber‹ noch ›Vertrauensadressaten‹; Letztere können durch *weltweit* metonymisch erschlossen werden, was den hohen Absolutheitsanspruch von BEIERSDORF markiert. Dennoch wird die Reziprozität des Vertrauenskonzeptes in den meisten Aussagen nicht aufgegriffen.

Die zentrale Stellung von VERTRAUEN im Bereich der Sachverhalte, aus denen UNTERNEHMENSIDENTITÄT sich konstituiert, zeigt sich auf der Satzebene auch an den Sprachhandlungen, die vorgenommen werden, um VERTRAUEN als besonders ›wichtig‹ zu bewerten:

Unsere Arbeit dreht sich um Menschen – um ihre Bedürfnisse, Sorgen, Wünsche und Träume. Deshalb ist unser wichtigster Maßstab: Vertrauen. Dieses Vertrauen entsteht, wenn wir gemeinsam bestimmte Werte leben. (Allianz Kultur und Werte)

Auch durch metareflektierende Formulierungen (*so viel...wie möglich*) geschehen Sachverhaltsbewertungen:

Denn je solider eine Unternehmenskultur auf gemeinsamen Werten beruht, desto weniger behindern zentrale Kontrollinstanzen und bürokratische Prozesse die Arbeit. So viel Vertrauen wie möglich, so viel Kontrolle wie nötig. (Merck Einzigartig – Der Merck Weg)

VERTRAUEN erscheint in metaphorischen Wendungen als BASIS oder GRUND, was auf der Sprachoberfläche im Kontext von *Führung\**, *\*kommunikation*, *Zusammenarbeit* oder *\*beziehung* realisiert wird:

Unsere Führungskultur basiert auf gegenseitigem Vertrauen. (K+S GB 2010)

Vertrauen und Offenheit sind die Grundlage unserer Unternehmens- und Finanzkommunikation. (MAN Unternehmensleitbild)

Durch diese Metaphern werden scheinbare Kausalitäten (VERTRAUEN → WIRKUNG) konstruiert (→ 8.4.1). Auch die Reihenfolge WIRKUNG → VERTRAUEN → URSACHE ist als Kausalkonnex im Korpus auffindbar:

Führung basiert auf gegenseitigem Vertrauen, Vertrauen basiert auf Berechenbarkeit und Fairness. (BMW GB 2010)

Nachhaltiges Investieren setzt einen offenen Dialog zwischen Investoren, Analysten und Deutsche Post DHL voraus. Die Basis dieses Vertrauens sind zeitnahe, umfassende und kontinuierliche Informationen für Investoren. (Deutsche Post GB 2010)

Die analysierten Kausalitäten offenbaren, dass VERTRAUEN von den Unternehmen kollektiv als fundamentale BASIS jeder interpersonellen sowie intra- oder interorganisationalen (Geschäfts-)Beziehung konstituiert wird (>Vertrauen ist die Grundlage in Unternehmensprozessen<), jedoch >Vertrauensgeber< und >Vertrauensadressaten< oftmals wiederum nicht realisiert werden und es somit nur um eine Konstatierung von VERTRAUEN nach ‚außen‘ seitens der Unternehmen geht.

Insgesamt seltener als das Substantiv *Vertrauen* kommt das Verb *vertrauen* vor. Durch dieses wird jedoch auf der Satzebene das Konzept >Vertrauensadressaten< aufgerufen (auf die Frage wem (X) *vertrauen*?); dazu zählen ‚Unternehmen‘ und ‚Produkte‘:

So bleiben wir heute und auch in Zukunft, was wir bereits sind: ein Unternehmen, dem man vertrauen kann. (BDF Imagebroschüre)

Zu ihrem Sortiment zählen globale, wissenschaftlich fundierte Markenprodukte, denen die Konsumenten vertrauen. (Merck GB 2010)

Auf ‚Personen‘ wird sich bezogen durch *Kollegen*, *Mitarbeiter* oder mittels Pronomen:

Uns gegenseitig fördern und fordern, bestärken und vertrauen. (Linde Der Linde Spirit)

Das Verb *vertrauen* wird in vielen Fällen auch um die Präposition *auf* + >Vertrauensträger< ergänzt, wodurch die Fokalisierung auf FRESenius MEDICAL CARE im Folgenden nochmals verstärkt wird:

Wir tragen mit diesem Engagement gleichermaßen Verantwortung für unsere Patienten, Partner im Gesundheitssystem und Investoren, die auf die Zukunfts- und Ertragssicherheit von Fresenius Medical Care vertrauen. (FMC Unsere Vision)

Dieses Kapitel legte dar, dass VERTRAUEN (v.a. die ‚Vertrauensschaffung‘) ein zentraler Sachverhalt für die Konstruktion von UNTERNEHMENSIDENTITÄT ist, was unter anderem auch die vielen Kausalitätskonstruktionen anzeigten. Unternehmen werben um dieses VERTRAUEN explizit kommunikativ und stellen Kausalitäten her (z.B. VERTRAUEN → WIRKUNG) – jedoch ohne die Konzepte >Vertrauensgeber< und >Vertrauensadressaten< miteinzubeziehen. Ist dieses VERTRAUEN sprachlich aus der Unternehmensperspektive *geschaffen*, eröffnet es weitere Handlungsräume (z.B. Gewinnung neuer Kunden, Partner oder besserer Marktkonditionen).

Jedoch stellt sich hierbei zuletzt die Frage, warum der Sachverhalt VERTRAUEN so explizit sprachlich hervorgehoben wird (was sich auch auf die anderen VERHALTENSEIGENSCHAFTEN übertragen ließe).<sup>64</sup>

### 1.2.2.3 SICHERHEIT

SICHERHEIT wird bereits metasprachlich eine Wichtigkeit zuerkannt, indem vom *Thema Sicherheit* gesprochen wird:

In den USA engagiert sich Linde beim Thema Sicherheit unter anderem als Sponsor eines Sicherheitstags für den Umgang mit Industriegasen auf dem Campus der Pennsylvania State University in DuBois, Pennsylvania. (Linde GB 2010)

Beim Thema Sicherheit sind wir seit 25 Jahren mit den anspruchsvollsten und größten Chipkartenprojekten betraut. (Infineon GB 2010)

Diese kommunikative Aufwertung des Sachverhalts SICHERHEIT geschieht daneben durch Formulierungsvarianten wie *in Sachen/lin puncto Sicherheit*<sup>65</sup>. Eine exponierte Stellung von SICHERHEIT in der Themenhierarchie der Unternehmen innerhalb von UNTERNEHMENSIDENTITÄT wird daneben durch bewertende Hierarchisierungen markiert:

Sicherheit steht bei der K+S Gruppe überall an erster Stelle: So ist das Sichern der Arbeitsbereiche unter Tage eine wichtige Aufgabe. (K+S GB 2010)

Wir haben bei Linde Ansprechpartner, die sofort zur Verfügung stehen, sobald man sie braucht, und deren Rat uns und unseren Patienten hilft. Sie machen sich unser Anliegen zu eigen, übernehmen Verantwortung und stellen Sicherheit über alles. (Linde GB 2010)

Besonders bei DAIMLER, FRESENIUS MEDICAL CARE, DEUTSCHE POST sowie K+S scheint der Sachverhalt SICHERHEIT zentral zu sein, indem diese rekurrent das Lexem *Sicherheit* verwenden, das ebenfalls als *Keyword* und Hochfrequenzwort im Korpus auftritt: So besitzt das Morphem *\*sicher\** auch 4.393 Hits und *\*sicherheit\** 1.287 Hits. DAIMLER arbeitet hierbei mit diversen Komposita (*Sicherheitsphilosophie*, *Sicherheitsprogramme* etc.) sowie Anglizismen (*Real Life Safety*), die SICHERHEITSPROGRAMME von DAIMLER bezeichnen. Fast alle Unternehmen im Korpus führen darüber das Kompositum *Arbeitssicherheit* (>Sicherheitsart<, ‚Arbeitssicherheit‘) an und bewerten dieses häufig metareflektierend durch *höchste Priorität/Bedeutung*:

Arbeitssicherheit und Gesundheitsmanagement haben bei der BMW Group höchste Priorität. (BMW Verhaltenskodex)

---

<sup>64</sup> Keller (2006b, 15f.) bemerkt, dass VERTRAUEN als Grundphänomen jeder sozialer Interaktion gelte und unthematisiert bleibe, solange dieses in ausreichendem Ausmaß vorhanden sei. Er zeigt anschaulich, dass „Unternehmenskommunikation im Dienste der Vertrauensbildung prinzipiell dilemmatischer Struktur ist“ (Keller 2006b, 3), denn Kommunikation wird Vertrauenswürdigkeit unterstellt. Unternehmen stehen daher vor einem zweifachen Vertrauensproblem, „mit einem, das das Geschäft betrifft, und einem, das die Kommunikation über das Geschäft betrifft. Das Unternehmen muss sich also in zweifacher Weise als vertrauenswürdig beweisen“ (Keller 2006a, 42). Gleichzeitig sieht er die Erwähnung des Wortes *Vertrauen* auch als problematisch an, „als Symptom[...], dass es Anlass zum Zweifel gibt“ (Keller 2006b, 16).

<sup>65</sup> Vgl. dazu: „Als Pionier in Sachen Sicherheit verfolgen wir weiterhin unseren Weg zum unfallfreien Fahren.“ (Daimler Das Unternehmen 2011).



Dreigliedrige Komposita zeigen sich auf der lexikalischen Ebene, welche die Institutionalisierung von ‚Arbeitssicherheit‘ andeuten (v.a. bei K+S sowie E.ON):

Die Sicherheit aller, die für uns arbeiten, hat für uns Priorität. Darüber hinaus sind wir davon überzeugt, dass eine gute Arbeitssicherheitsleistung die Qualität bei unseren Infrastrukturmaßnahmen, wie zum Beispiel Wartung und Instandhaltung oder Neubauprojekte, und die Kundenzufriedenheit positiv beeinflusst. In 2010 konnten wir unsere gute Arbeitssicherheitsleistung weiter festigen. [...]. Um unser ehrgeiziges Arbeitssicherheitsziel zu realisieren, 2015 zu den sichersten Unternehmen weltweit zu gehören, werden wir weiter verstärkt präventive, pro-aktive Maßnahmen implementieren und deren Bewertung zudem in der variablen Vergütung berücksichtigen. [...]. Dazu dienen jährliche Arbeitssicherheitsprogramme unserer Gesellschaften, die Bestandteil von Zielvereinbarungen sind, sowie harmonisierte Arbeitssicherheitsmanagement-Systeme. Aber auch Maßnahmen, die eine positive Arbeitssicherheitskultur und das verantwortliche Verhalten jedes Einzelnen fördern, sind unser Ziel. (E.ON Cleaner and better energy)

Das Lexem *Arbeitssicherheitskultur* im letzten Satz des Belegs wertet den Sachverhalt ARBEITSSICHERHEIT symbolisch auf. Als weitere ›Sicherheitsart‹ tritt ‚Produktsicherheit‘ im Korpus auf:

800 Mio. LÖSUNGEN FÜR PRODUKTSICHERHEIT VON SAP HELFEN 800 MILLIONEN VERBRAUCHERN, SICHER UND GESUND ZU LEBEN. (SAP GB 2010)

Daneben finden sich Hyponyme zu *Produktsicherheit*: *Automobilsicherheit* wird beispielsweise von DAIMLER durchweg konstatierend wiederaufgenommen:

Seit vielen Jahrzehnten arbeitet Daimler an der Optimierung der Automobilsicherheit. Bis heute haben wir eine Vielzahl von Technologien und Systemen auf den Markt gebracht, die die Sicherheit in allen Fahrzeugen von Daimler, ob Pkw oder Nutzfahrzeug, nachweislich erhöhen. (Daimler Unternehmensinformationen 2010)

Diese Aussage von DAIMLER wird auch auf der Text-Bild-Ebene deutlich: Bezeichnenderweise sind in → Abbildung 86 *Idrei gelbe Fahrzeuge!* mit den Ausdrücken *Safety Van*, *Safety Coach* und *Safety Truck* beschriftet, wobei die FAHRZEUGE von DAIMLER somit das Konzept ›Sicherheit‹ materialisieren:

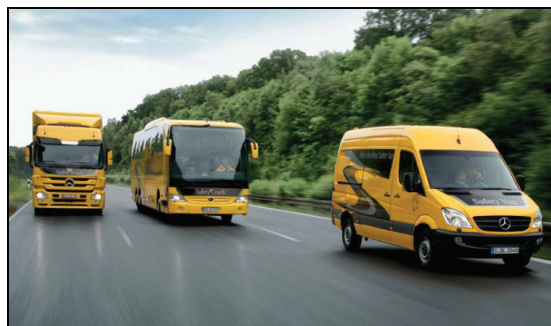

Abbildung 86 - Daimler Unternehmensinformationen 2010

Als Metonym für *Automobilsicherheit* kann auch *Verkehrssicherheit* angesehen werden, was ebenfalls markant von DAIMLER verwendet wird:

Dabei definiert Daimler Verkehrssicherheit als ganzheitliche Aufgabe. Neben der Weiter- und Neuentwicklung von Systemen für den Insassen- und Partnerschutz liegt die Herausforderung für uns deshalb auch darin, eine intelligente Verkehrsinfrastruktur mit zu entwickeln. (Daimler Das Unternehmen 2011)

Der Beleg zeigt anschaulich, dass DAIMLER eine Bedeutungsfixierung (*definiert*) und damit Sachverhaltsfestsetzung von VERKEHRSSICHERHEIT anstrebt, was nicht nur durch die hohe

Anzahl der Nennungen von *Verkehrssicherheit* sowie der festsetzenden Verben *sein* (und *definieren*) in weiteren Aussagen DAIMLERS bestätigt wird, sondern auch durch Rollenzuschreibungen (*Pionier der Verkehrssicherheit*<sup>66</sup>) mit hohem Absolutheitsanspruch. Der Ausdruck *Versorgungssicherheit*<sup>67</sup> wird dagegen besonders von den Energieversorgern angeführt und teilweise mittels Sachverhaltsfestsetzungsversuchen von VERSORGUNGSSICHERHEIT durch Definitionen auf der Textebene versehen. RWE nimmt dies mehrmals ausführlich vor:

Versorgungssicherheit. Energie muss zur Verfügung stehen, wenn sie gebraucht wird. Unsere Kunden vertrauen darauf, dass wir dieses sicherstellen – heute und in Zukunft. RWE setzt deshalb auf ein ausgewogenes und breit gefächertes Stromerzeugungsportfolio aus Kernenergie, Kohle, Gas und erneuerbaren Energien. (RWE GB 2010)

*Versorgungssicherheit* wird von RWE stark prospektiv verstanden und als ‚Zukunftssicherheit‘ ausgedeutet (→ 9.2.15.2). Als erste Konstituente in Komposita zeigt *Sicherheit\** indessen ›Sicherheitsträger‹ an. DAIMLER, FRESENIUS MEDICAL CARE und FRESENIUS evozieren diesbezüglich ‚Sicherheitssysteme‘:

Die Verwirklichung unserer Vision vom unfallfreien Fahren rückt näher – und wann immer ein Unfall nicht mehr zu verhindern ist, minimieren innovative Sicherheitssysteme den Schaden für die Verkehrsteilnehmer, inner- wie außerhalb des Fahrzeugs. (Daimler Das Unternehmen 2011)

Eine Ausdifferenzierung des Konzeptes ›Sicherheitsträger‹ wird durch ‚Sicherheitsprodukte‘ vorgenommen, was sich lexikalisch anhand von *Sicherheitsprodukt*<sup>68</sup>, *Sicherheitstechnologien*<sup>69</sup>, *Sicherheitslösungen*<sup>70</sup>, *Sicherheitsinnovationen*<sup>71</sup>, *Sicherheitskonzepte* und *Sicherheitsmechanismus*<sup>72</sup> wiederfindet:

Halbleiter-Sicherheitstechnologien von Infineon schützen digitale Informationen vor Missbrauch: Sie wachen über virtuelles Geld und sensible elektronische Dokumente. (Infineon Wer wir sind)

Des Weiteren wird das Konzept ›Sicherheitsträger‹ auch durch ‚Sicherheitsereignisse‘ ausgedeutet (*Sicherheitsfilm*, *Sicherheitstag*<sup>73</sup>, *Sicherheitsinitiative*, *Sicherheitskonferenz*<sup>74</sup>). Bei DAIMLER münden diese Ausführungen wiederholt in die symbolische Aufwertung des Sach-

---

<sup>66</sup> Vgl. dazu: „Sicher ankommen. Als Pionier der Verkehrssicherheit verfolgen wir weiterhin den Weg zum unfallfreien Fahren.“ (Daimler Das Unternehmen 2011).

<sup>67</sup> Vgl. dazu: „Anpassung an den Klimawandel ist für RWE vor allem eine Frage der Versorgungssicherheit.“ (RWE Unsere Verantwortung 2010).

<sup>68</sup> Vgl. dazu: „Auftausalz – das Sicherheitsprodukt im Strassenwinterdienst.“ (K+S GB 2010).

<sup>69</sup> Vgl. dazu: „Seit 1969 untersuchen wir Unfälle auf deutschen Straßen. Diese Erkenntnisse geben wichtige Impulse für die Entwicklung neuer Sicherheitstechnologien.“ (Daimler Unternehmensinformationen 2010).

<sup>70</sup> Vgl. dazu: „Unsere Innovationen in diesen drei Kompetenzfeldern ermöglichen unseren Kunden die Implementierung moderner Hardware-basierter Sicherheitslösungen.“ (Infineon GB 2010).

<sup>71</sup> Vgl. dazu: „Beeindruckendes Ergebnis dieser Sicherheitsinnovationen: Die Unfallstatistik wies im Jahr 2008 nur noch ein Drittel der Unfalldoten von 1953 aus – und das, obwohl sich die Anzahl der Fahrzeuge auf Deutschlands Straßen seitdem verdreifacht hat.“ (Daimler Unternehmensinformationen 2010).

<sup>72</sup> Vgl. dazu: „Täglich ereignen sich in medizinischen Einrichtungen zahlreiche ungewollte Verletzungen durch Nadelstiche. Ambix Intrastick Safe enthält einen integrierten Sicherheitsmechanismus, der eine Berührung mit der Spritzenkanüle verhindert und [...] Stich-, Schnitt- oder Kratzverletzungen vorbeugt.“ (Fresenius GB 2010).

<sup>73</sup> Vgl. dazu: In den USA engagiert sich Linde beim Thema Sicherheit unter anderem als Sponsor eines Sicherheitstags für den Umgang mit Industriegasen.“ (Linde GB 2010).

<sup>74</sup> Vgl. dazu: „Zudem hat Lufthansa Cargo auch 2010 wieder zwei Sicherheitskonferenzen in Frankfurt und New York ausgerichtet.“ (Lufthansa GB 2010).

verhalts SICHERHEIT durch den Ausdruck *Sicherheitsphilosophie*, der direkt an das UNTERNEHMEN (*Sicherheitsphilosophie von Daimler*) gebunden wird:

Ganzheitlich denken und handeln. Die Verkehrsteilnehmer in allen Situationen zu schützen und zu unterstützen, ist das Ziel der Integralen Sicherheitsphilosophie von Daimler. (Daimler Unternehmensinformationen 2010)

RWE und E.ON nutzen den Ausdruck *Sicherheitskultur*, der bei RWE in der Wiederaufnahme einen sprechenden Eigennamen erhält (*Sicher voRWEg*):

Auch die Sicherheitskultur bei RWE liegt uns am Herzen. Um sie weiter zu verbessern, haben wir Anfang 2008 die Kampagne „Sicher voRWEg“ gestartet, deren Schwerpunkt eine Unterweisung unserer Führungskräfte war. (RWE GB 2010)

Dass SICHERHEIT durch die aufgeführten ›Sicherheitsträger‹ zum integralen Bestandteil des Systems UNTERNEHMEN wird, zeigt sich auch durch diverse ‚Sicherheitsregularien‘:

Wir planen und betreiben unsere Anlagen unter strenger Beachtung der Sicherheitsvorschriften. So verringern wir das Risiko von Unfällen und sichern den störungsfreien Anlagenbetrieb. (BMW Verhaltenskodex)

Wir wollen zur weiteren Verbesserung von Sicherheitsaspekten und zur Nachhaltigkeit der Sicherheitsmaßnahmen beitragen, vor allem im Sinne unserer Kunden, Geschäftspartner und Mitarbeiter. (Deutsche Post GB 2010)

Die ‚Sicherheitsregularien‘ werden schließlich von ‚Sicherheitsinstanzen‘ zertifiziert:

Betriebliche Sicherheit, Einhaltung von Standards sowie Servicequalität unserer Standorte werden regelmäßig überprüft. Rund 170 Standorte sind zudem von der „Transported Asset Protection Association“ (TAPA), einer der weltweit angesehensten Sicherheitsorganisationen, zertifiziert. (Deutsche Post GB 2010)

Gleichzeitig wird ‚Sicherheitsinstanzen‘ auch durch den Ausdruck *Sicherheitsauszeichnungen* aufgerufen, worin sich der kompetitive Charakter des ökonomischen Diskurses widerspiegelt:

Linde ist Mitglied und Unterstützer der American Chemistry Council’s Responsibility Care Initiative und hat bereits zahlreiche Sicherheitsauszeichnungen gewonnen. (Linde GB 2010)

Diese Kompositaauswertung veranschaulicht somit die starke Institutionalisierung von SICHERHEIT durch die diversen Besetzungen von ›Sicherheitsträger‹ und evoziert demzufolge das Konzept ›Sicherheit ist in Unternehmen institutionalisiert‹.

Vergrößert man den Analysefokus und betrachtet *Sicherheit* auf erweiterter lexikalischer Ebene, wird wiederum die sequentielle Reihung mit anderen Hochwertwörtern ersichtlich (*Sicherheit und X* oder *X, Sicherheit und Y*). Vor allem *Qualität*, *Umwelt\** und *Gesundheit* gruppieren sich häufig um das Lexem und bilden X/Y-Komponenten (›Korrelation von Sicherheit und X/Y‹).<sup>75</sup>

Unser Ziel ist es, die Sicherheit und Umweltverträglichkeit unserer Produkte in allen Phasen der Wertschöpfungskette ständig weiter zu verbessern – von der Förderung unserer Rohstoffe über Produktion und Distribution bis hin zur Anwendung. (K+S GB 2010)

LUFTHANSA liefert indessen viele Belege für das Attribut ‚Qualität‘:

---

<sup>75</sup> Auch vierwertige Reihungen finden sich, welche die drei aufgeführten Attribute kombinieren (z.B. *Gesundheit, Sicherheit, Umwelt und Qualität*).

Durch kontinuierliches Streben nach Sicherheit, Qualität und Innovationen, die unser Geschäft gesellschaftlich nachhaltiger und umwelt verträglicher machen, verbessern wir mit Spitzentechnologie unsere Chancen im Markt. (Lufthansa GB 2010)

Während diese Beispiele insbesondere die ‚physische Komponente‘ von SICHERHEIT in Unternehmen betonen, zeigen sich weitere Ausdrücke in Konkurrenz mit *Sicherheit*, die durch ihre affektive Konnotation den Sachverhalt SICHERHEIT um eine ‚emotionale Komponente‘ erweitern: Es handelt sich meist um die Substantive *Verlässlichkeit*, *Zuverlässigkeit* und *Vertrauen*:

Qualität, Sicherheit und Zuverlässigkeit sind für Linde die wichtigsten Kriterien für Produkte, Technologien und Dienstleistungen. (Linde GB 2010)

Mercedes-Benz: Busse, die für Sicherheit und Vertrauen stehen. (Daimler Unternehmensinformationen 2010)

Durch diese Konkurrenzen wird ein ›Sicherheitszustand‹ suggeriert, der wiederum Konzepte wie ›Geborgenheit‹ bei Rezipienten mitaufruft. Die DEUTSCHE POST weckt diese Konnotation im *Geschäftsbericht 2010* auch durch folgendes Trikolon:

Ihre Wahl sein durch: Sicherheit. Vertrauen. Zuverlässigkeit. (Deutsche Post GB 2010)

Die Morpheme *zuverlässig\** und *verlässlich\** werden auch in weiteren Teilen im *Geschäftsbericht 2010* von DEUTSCHE POST eingesetzt, sodass der Wissensrahmen ›Geborgenheit‹ aufrechterhalten wird:

Es sind verlässliche Qualität, eine leistungsfähige Infrastruktur, jahrzehntelange Erfahrung und Nähe, die Kunden täglich überzeugen. (Deutsche Post GB 2010)

Ein weiterer aufschlussreicher Befund innerhalb der Syntagmen stellt die geringe Anzahl von adjektivischen Attributionen der Form *x Sicherheit* dar: Es finden sich zwar die diskurstypischen Konstruktionsmuster *hohe\*/höchste\* + Sicherheit*<sup>76</sup>, die zugleich eine Bewertung von SICHERHEIT vornehmen, dennoch erscheint der Sachverhalt SICHERHEIT durch den Ausdruck *Sicherheit* klar genug umrissen, dass er keiner weiteren Spezifizierung bedarf. Ausnahmen bilden fachsprachliche Fügungen (z.B. *aktive und passive Sicherheit* bei DAIMLER, *digitale Sicherheit* bei INFINEON). Attribute sind in der Mehrzahl der Fälle nachgestellt. Genitivattribute evozieren dabei ›Sicherheitsträger‹ durch die Form *Sicherheit der X*: Als nicht-belebte Konzeptattribute finden sich ‚Produkte‘<sup>77</sup>, ‚Fahrzeuge‘<sup>78</sup> sowie ‚Stromversorgung‘. ‚Personen‘ als ›Sicherheitsträger‹ sind meist ‚Mitarbeiter‘:

---

<sup>76</sup> Vgl. dazu: „Know-How gepaart mit höchster Sicherheit: Darin sind unsere Geschäftsbereiche täglich Schrittmacher – von den Spezialisten der Lufthansa Technik bis hin zur Lufthansa Flight Training, die mit modernster Simulatortechnik praxisnahe Ausbildung garantiert.“ (Lufthansa GB 2010). Vgl. dazu auch die fragliche semantische Passung durch die diskurstypische Bewertung ‚einzigartig‘: „Einzigartige Sicherheit für Fahrer und Begleiter bei einem Frontalaufprall im Omnibus erreicht das System Front Collision Guard (FCG), [...]“ (Daimler Unternehmensinformationen 2010).

<sup>77</sup> Vgl. dazu: „Nationale und internationale Arbeitsgruppen haben bislang über 180 Studien zu VoluvenR publiziert, die die Wirksamkeit und Sicherheit des Produkts unterstützen.“ (Fresenius GB 2010).

<sup>78</sup> Vgl. dazu: „Daimler arbeitet mit Hochdruck an der Sicherheit der eigenen Fahrzeuge und am Erfolg des gesamten Verkehrssystems [...]“ (Daimler Das Unternehmen 2011).

Für uns sind Sicherheit und Gesundheit der Mitarbeiter ein gleichrangiges Unternehmensziel zu wirtschaftlichem Erfolg und hoher Qualität der Erzeugnisse. (ThyssenKrupp GB 2010)

Weitere rechtsseitige Anschlüsse werden durch adverbiale Bestimmungen vorgenommen, die das Konzept ›Sicherheitslokalisierung‹ aufrufen und bei DAIMLER, K+S sowie HEIDELBERG-CEMENT zahlreich auftreten:

Ein weiteres Kernanliegen: Sicherheit im Straßenverkehr. Schon immer waren wir bei der Entwicklung neuer Technologien und der Verbesserung der Aktiven und Passiven Sicherheit unserer Zeit voraus. (Daimler Unternehmensinformationen 2010)

Betrachtet man ebenfalls die musterhaften rechtsseitigen Präpositionalphrasen (*Sicherheit für X*), können auch ›Sicherheitsadressaten‹ ausgemacht werden, da *für* als Präposition unter anderem eine Hinwendung zu *X* (*Käufer, Mitarbeiter*) anzeigt (vgl. Duden 2001, 588):

Neben Vielseitigkeit und hohem Erlebniswert durch redaktionelle Zusatzinformationen steht bei „Mein-Paket.de“ Sicherheit für Händler und Käufer im Vordergrund. (Deutsche Post GB 2010)

Im nächsten Schritt wird die Satzebene ausgewertet: Wenige Aussagen liefern dabei regelhaft Verbindungen der Konstruktion *Sicherheit* + Verb, wobei solche mit *gewährleisten* und *geben* Muster bilden:

Sicherheit gewährleisten. (Bayer Leitbild)

Gleichzeitig streuen wir mit den zwei Arbeitsfeldern das unternehmerische Risiko unserer Eigentümer. Was übrigens auch unseren Kunden und Mitarbeitern Sicherheit gibt. (Merck Einzigartig – Der Merck Weg)

Diese Aussagen unterstreichen die bisherigen Befunde: Das UNTERNEHMEN ist Agens und *gibt/gewährleistet* SICHERHEIT (von/der *X*) (für *Y*). Wie weiter oben schon angeführt, fallen schließlich diverse Bedeutungs- und Sachverhaltsfixierungsversuche mit *verstehen* oder *definieren* beim Sachverhalt SICHERHEIT auf:

Linde versteht Sicherheit umfassend: im Sinne von Versorgungssicherheit und Sicherheit in der Anwendung der Produkte, Verfahren und Anlagen für Kunden und Mitarbeiter. (Linde GB 2010)

SICHERHEIT wird jedoch auch durch das wiederkehrende Adjektiv *sicher\** konstituiert, das wiederum auf ›Sicherheitsträger‹ hinweist. Es handelt sich dabei vor allem um ‚Produkte‘ (z.B. *Fahrzeuge*), ‚Handlungen‘ (z.B. *Stromversorgung*) und ‚Orte‘ (z.B. *Märkte*):

Ziel des Konzerns ist es, attraktive, sichere und umweltschonende Fahrzeuge anzubieten, die im zunehmend scharfen Wettbewerb auf dem Markt konkurrenzfähig und jeweils Weltmaßstab in ihrer Klasse sind. (VW GB 2010)

Kernenergie ist für uns ein unverzichtbarer Baustein einer sicheren und umweltverträglichen Stromversorgung. (E.ON Cleaner and better energy)

Unter ‚Orte‘ taucht auch der Ausdruck *Unternehmen* in Kombination mit dem Superlativ *sicherste\** auf:

Um unser ehrgeiziges Arbeitssicherheitsziel zu realisieren, 2015 zu den sichersten Unternehmen weltweit zu gehören, werden wir weiter verstärkt präventive, pro-aktive Maßnahmen implementieren und deren Bewertung zudem in der variablen Vergütung berücksichtigen. (E.ON Cleaner and better energy)

RWE hat sich zum Ziel gesetzt, ein „Null-Unfall“-Unternehmen zu werden. Wir wollen das sicherste Unternehmen unserer Branche werden. (RWE Unsere Verantwortung 2010)



Diese Belege bekräftigen den hohen Absolutheitsanspruch der Unternehmen in Bezug auf SICHERHEIT im Diskurs, die metonymisch auf das UNTERNEHMEN selbst übertragen (*sichers-te\* Unternehmen*) und als Ideal überhöht (*Sicherheitsphilosophie*) festgesetzt werden soll.<sup>79</sup> Das „Stigma“-Konzept ›Risiko‹ (vgl. Freitag 2013, 129ff.) wird daher im Diskurs kaum thematisiert.<sup>80</sup> MUNICH RE als Rückversicherer kann ›Risiko‹ (RISIKO) jedoch als Teil seines Produktgeschäfts im Sinne eines Alleinstellungsmerkmals ausführlich sprachlich ausfüllen. Die folgenden Periphrasen *rund ums Risiko* oder *Welt der Risiken* allegorisieren den Sachverhalt RISIKO:

Erfahrung, Finanzkraft, Effizienz und ein erstklassiger Service machen uns zum ersten Ansprechpartner in allen Fragen rund ums Risiko. (Munich Re Über Munich Re)

Die Welt der Risiken wird immer komplexer. (Munich Re Strategie)

Die Kollokation *Risiko managen* findet sich bei MUNICH RE ebenso aufgeführt:

Risiken zu managen ist unsere Stärke. (Munich Re Über Munich Re)

Ein *Risiko* zu *managen*<sup>81</sup> bedeutet inhaltlich, das RISIKO kontrollieren zu können. Sind RISIKEN kontrollierbar, werden sie laut Bayertz (1995, 49) als erheblich geringer in ihrer negativen Konnotation von Rezipienten eingestuft.<sup>82</sup> Laut Kirchhoff (2001, 7) wird die Thematisierung von ›Risiko‹ in Verbindung mit ›Verantwortung‹ zudem als Kompetenz des Managements angesehen, was MUNICH RE durch *Stärke* im letzten Beleg unterstreicht. Man könnte somit unterstellen, dass die Thematisierung von ›Risiko‹ bei den Anspruchsgruppen von MUNICH RE eine höhere Glaubwürdigkeit erzeugen soll. Es verdeutlicht, dass das Unternehmen sich nicht der Verantwortung entzieht, sondern die möglichen RISIKEN antizipiert (*Risiken managen*). Zusammenfassend könnte man in diesem Kapitel von der Funktionalisierung eines positiv besetzten Begriffes (›Sicherheit‹) sprechen, da sich die UNTERNEHMEN selbst als Garanten der SICHERHEIT erschaffen (›Sicherheitsträger‹, ›Sicherheit ist in Unternehmen institutionalisiert‹).

---

<sup>79</sup> Insgesamt weniger wird die Prozessperspektive mit dem Verb *sichern* eingenommen. Durch die Nominalisierung *\*sicherung* wird in manchen Fällen auch eine resultative Perspektive eingenommen (vgl. Köller 2004, 368), d.h. SICHERHEIT wird als bereits existent konstituiert: „Bezahlbarer Strom ist ein wichtiger Standortfaktor für die deutsche Industrie und trägt damit zur Sicherung von Arbeitsplätzen bei.“ (RWE GB 2010).

<sup>80</sup> Ebenfalls Hofstede (2001) betont, dass deutsche Unternehmen ›Unsicherheit‹ weniger versprachlichen als Niederländische. Vgl. dazu auch Felder (2012, 149), der die Popularität des Konzeptes ›Sicherheit‹ in der Medienberichterstattung zum Fall der Mauer feststellt, da das Konzept seit den 1990ern als gesellschaftspolitisch wichtiger Wert aufgewertet wurde (‚sozial‘, ‚wirtschaftlich‘). Vor 1989 war das Konzept fast ausschließlich mit Attributen wie ‚militärisch‘ oder ‚friedenspolitisch‘ evoziert worden.

<sup>81</sup> Vgl. dazu auch: „Die Händler und Risikomanager sorgen für den bestmöglichen Einsatz der europäischen E.ON-Kraftwerke [...]“ (E.ON Cleaner and better energy).

<sup>82</sup> Es wird konnotativ mitausgesagt, dass ›Risiko‹ keine begriffliche Gleichsetzung zu ›Gefahr‹ ist, denn diese ist unwägbare – ein Risiko kann jedoch kalkuliert werden (vgl. Bayertz 1995, 49).



#### 1.2.2.4 TRANSPARENZ

TRANSPARENZ wird vornehmlich im Bereich *Banking* thematisiert (v.a. bei DEUTSCHE BÖRSE). Jedoch taucht *\*transparenz\** (188 Hits in den Konkordanzen) auch unter den WERTEN anderer Unternehmen auf: *Transparenz* wird dann, ähnlich wie *Respekt* und *Integrität*, als zu definierender Ausdruck unter dem Versuch einer Bedeutungsfixierung eingeführt:

**Transparenz.** Wir suchen den aktiven Dialog mit unseren Partnern und unserem Umfeld. Unseren Mitarbeitern, den Aktionären, dem Kapitalmarkt und den Medien stellen wir regelmäßig umfassende, wahrheitsgetreue und verständliche Informationen zur Verfügung. (K+S Grundwerte)

- Transparenz ist die Beteiligung aller Anspruchsgruppen durch Information.
- Transparenz macht unser Handeln verstehbar.
- Transparenz unterstützt zielorientiertes Handeln im ganzen Unternehmen.
- Transparenz schafft Verlässlichkeit. (Merck Merck Werte)

Ebenso wird ein deontischer Anspruch an TRANSPARENZ metasprachlich formuliert (*Muss*):

Bei der Ausgabe neuer Wertpapiere ist Transparenz ein *Muss*. (BMW Verhaltenskodex)

Auf der lexikalischen Ebene füttern Komposita das dabei zugrunde liegende Konzept ›Transparenzambition‹:

Nach Vorwürfen, durch eine künstliche Verknappung des Stromangebots den Markt zu beeinflussen, startete RWE 2008 eine Transparenzoffensive und veröffentlicht seither zeitnah alle marktrelevanten Daten zur Stromerzeugung sowie zur Verfügbarkeit von Kraftwerken. (RWE Unsere Verantwortung 2010)

Auf der syntagmatischen Ebene findet sich *Transparenz* beständig in sequenzieller Reihung mit anderen Hochwertwörtern (›Korrelation von Transparenz und X‹): X wird dabei durch die Attribute ‚Effizienz‘<sup>83</sup>, ‚Liquidität‘<sup>84</sup>, ‚Verlässlichkeit‘<sup>85</sup>, ‚Kommunikation‘ und ‚Glaubwürdigkeit‘ angereichert:

Transparenz und Glaubwürdigkeit sind wesentliche Bestandteile unserer Unternehmenskultur. (Metro Corporate Principles)

Ebenso in adjektivischen Reihungen mit *transparent\** tauchen die genannten Attribute auf:

Unsere Informationspolitik ist transparent, wahrheitsgetreu und verantwortungsbewusst. (HeidelbergCement Unser Unternehmensleitbild)

Auffallend sind dabei die Verbindungen mit *glaubwürdig\** und *wahrheitsgetreu*, welche die Frage nach Authentizität (vgl. Felder 2013) aufgreifen. Ergänzt wird in adjektivischen Reihungen auch häufig ‚Offenheit‘, wobei die häufig auftretende Konstruktion *offene und transparente Kommunikation* tautologisch ist. Mittels des Adjektivs *transparent\** werden zugleich ›Transparenzträger‹ wie ‚Kommunikation‘ mitaufgerufen. Weitere ›Transparenzträger‹, die sich in den Aussagen der untersuchten Unternehmen zeigen, sind ‚Informationen‘ und ‚Be-

---

<sup>83</sup> Vgl. dazu: „Um Transparenz, Effizienz und schnelle Umsetzung im Konzern zu gewährleisten, standardisiert HeidelbergCement alle wesentlichen Managementprozesse.“ (HeidelbergCement GB 2010).

<sup>84</sup> Vgl. dazu: „Auf den Gasmärkten haben sich Transparenz, Liquidität und Dynamik spürbar erhöht.“ (E.ON Cleaner and better energy).

<sup>85</sup> Vgl. dazu: „Mit Verlässlichkeit und Transparenz das Vertrauen unserer Investoren rechtfertigen.“ (E.ON Cleaner and better energy).

richterstattung'.<sup>86</sup> TRANSPARENZ wird daher vor allem im Hinblick auf ‚Glaubwürdigkeit‘ und ‚transparente Interaktion‘ konstituiert. RWE schreibt sich durch das Syntagma *transparenter Partner* gleichzeitig die Rolle ›Transparenzträger‹ zu:

Wir wollen durch unsere Preisgestaltung und unser Verhalten an den Märkten einen wesentlichen Beitrag dazu leisten, dass RWE als fairer und transparenter Partner wahrgenommen wird. (RWE Unsere Verantwortung 2010)

Des Weiteren finden sich auf syntagmatischer Ebene diverse Sachverhaltsbewertungen von TRANSPARENZ, indem das Konzept ›Transparenzart‹ besonders Konstruktionen mittels dimensionaler Adjektive (v.a. *hohe\*/höchste\** im Positiv und Superlativ) evozieren:

Xetra steht für vollelektronischen Handel mit höchster Transparenz. (Deutsche Börse Vom Parkett zum elektronischen Handelsplatz)

Lexikalische Varianten für *hohe\*/höchste\* Transparenz* sind *volle*<sup>87</sup>, *unternehmensweite*<sup>88</sup> oder *größtmögliche\* + Transparenz*, die wiederum das Konzept der ›Transparenzambition‹ aufrufen:

Es ist das Ziel der Merck KGaA, aktuelle Informationen an alle Aktionäre, Medien, Finanzanalysten und die interessierte Öffentlichkeit weiterzugeben und hierdurch eine größtmögliche Transparenz zu schaffen. Deswegen tritt Merck zeitnah und über eine große Bandbreite von Kommunikationsplattformen mit allen Interessierten in einen Dialog über die Unternehmenslage und geschäftliche Veränderungen. (Merck GB 2010)

MERCK bezieht in diesem Beleg auch die mediale Erreichbarkeit mit ein (*große Bandbreite von Kommunikationsplattformen*), was im Folgenden nochmals vertieft wird:

Zur Gewährleistung einer größtmöglichen Transparenz sind alle Dokumente rund um die jährlich stattfindende Hauptversammlung über die Website zugänglich. Außerdem findet eine teilweise Liveübertragung der Hauptversammlung im Internet statt. (Merck GB 2010)

Betrachtet man weitergehend die Satzebene, fällt die Kollokation *Transparenz schaffen* ins Auge, die im imperativischen bzw. deontischen Infinitiv realisiert ist (›Transparenzhandlung‹ ‚Transparenzschaffung‘), was durch das Kollokationsprofil an ‚Vertrauensschaffung‘ erinnert:

Transparenz schaffen. Die eigenen CO2-Emissionen erfassen wir über das Finanzsystem. Hierzu verknüpfen wir konzernweit Rechnungsdaten mit Verbrauchsdaten für Kraftstoffe und Energie. (Deutsche Post GB 2010)

Im Gegensatz dazu finden sich wenige Formen, die TRANSPARENZ als ‚bestehend‘ konstituieren (z.B. *X ist transparent*):

Unsere Informationspolitik ist transparent und bedient sich der neuesten Technologien. Wir informieren wahrheitsgetreu und verantwortungsbewusst. (HeidelbergCement Corporate Mission)

Betrachtet man anschließend die semantischen Rollen in Verbindung mit der Kollokation

---

<sup>86</sup> Vgl. dazu: „Erfolgreiche Unternehmen wissen, wie man Chancen erkennt – und nutzt. Was zählt, sind transparente Informationen, Handlungsfähigkeit und Geschwindigkeit.“ (SAP GB 2010).

<sup>87</sup> Vgl. dazu: „Alle Marktteilnehmer verfügen damit über dieselben Informationen. RWE unterstützt die Initiative der EU für volle Transparenz im Energiehandel, die im Herbst 2010 gestartet wurde.“ (RWE Unsere Verantwortung 2010).

<sup>88</sup> Vgl. dazu: „AirPlus ermöglicht ihren Kunden dabei eine unternehmensweite Transparenz hinsichtlich sämtlicher Geschäftsreiseausgaben und liefert so alle Voraussetzungen für ein effektives Reisekostencontrolling.“ (Lufthansa GB 2010).

*Transparenz schaffen*, zeigen sich Kausalitätskonstruktionen, in denen TRANSPARENZ zur URSACHE einer bestimmten WIRKUNG wird, wobei es sich dabei meist um VERTRAUEN handelt (TRANSPARENZ → VERTRAUEN):

Transparenz schafft Vertrauen auf den Kapitalmärkten. (BMW Verhaltenskodex)

In den meisten Belegen wird der dabei zugrunde liegende Schluss ›Transparenz schafft Vertrauen‹ in der Bedeutungsnuancierung ‚durch Transparenz entsteht linear Vertrauen als direkte Folge‘ realisiert. Eine zweite Möglichkeit erscheint im Konzeptattribut ‚durch Transparenz ist die Möglichkeit zur Vertrauensbildung als indirekte Folge gegeben‘, das durch *Voraussetzung\** oder *Bildung* im Kontext von *Vertrauen* aufgerufen wird:

Einen besonderen Wert für Henkel stellt die aktive und offene Informationspolitik dar, da sie Transparenz schafft und damit eine wichtige Voraussetzung für die Bildung von öffentlichem Vertrauen erfüllt. (Henkel Corporate Identity)

Interessant ist schließlich die Positionierung von DEUTSCHE BÖRSE durch die Metapher *Schnittstelle für Transparenz* (DEUTSCHE BÖRSE *Standpunkte*), da die postulierte TRANSPARENZ im weiteren Textverlauf eingeschränkt wird:

Die Börse könnte aus Sicht vieler Stakeholder dazu beitragen, Nachhaltigkeitsleistungen der Wirtschaft transparent zu machen [...]. Da es nicht die Aufgabe einer Börse ist, Leistungen zu bewerten, sondern nur, diese transparent abzubilden, kann die Deutsche Börse nicht zum Richter über ökologische und soziale Leistungen werden. (Deutsche Börse *Standpunkte*)

Die DEUTSCHE BÖRSE schreibt sich hiermit nur die Rolle ›Transparenzvermittler‹ zu (*transparent zu machen, transparent abbilden*) und distanziert sich von einem wertenden ›Transparenzrichter‹ ([...] *kann die Deutsche Börse nicht zum Richter [...] werden*). Diese Aussage ist in ihrer Neutralität fragwürdig, da die DEUTSCHE BÖRSE ebenso als eigenes profitorientiertes Unternehmen agiert. Dennoch grenzt sie sich als TRANSPARENZVERMITTLER von den anderen Unternehmen (im Sektor *Banking* ab) und schafft sich dadurch sprachlich eine Alleinstellung. Der Sachverhalt TRANSPARENZ dient somit, vor allem im Hinblick auf das Konzept ›Transparenzambition‹, als Postulat an externe Anspruchsgruppen, die Kommunikation der Unternehmen in Gänze nachvollziehbar zu machen (›Transparenzträger‹ ‚Interaktion‘; ›Transparenzart‹ ‚hoch‘), was zur Glaubwürdigkeit und zur positiven (Wieder-)Erkennbarkeit des Systems UNTERNEHMEN beiträgt.

#### 1.2.2.5 QUALITÄT

QUALITÄT wird in vielen Belegen als Sachverhalt thematisiert, die insbesondere von FRESENIUS MEDICAL CARE, FRESENIUS sowie HEIDELBERGCEMENT und K+S stammen. Auf der lexikalischen Ebene offenbaren sich diverse Belege für *\*qualität\** (1.094 Hits in den Konkordanzen), wobei meist Determinativkomposita mit dem Determinans *Qualität\**, die ›Qualitätsträger‹ anzeigen, auftauchen:

Das Qualitätsmanagement von HELIOS umfasst jedoch mehr als die medizinische Ergebnisqualität. (Fresenius GB 2010)

Die Passagier- und Frachtfluggesellschaften des Konzerns positionieren sich als Qualitäts-Airlines und bilden das Kerngeschäft. (Lufthansa GB 2010)

LUFTHANSA nutzt das Substantiv *Qualität*\* dabei wie ein positiv evaluierendes Adjektiv in Bezug auf *Airlines*. Der Sachverhalt QUALITÄTSAIRLINE wird durch das Kompositum *Qualitäts-Airlines* bereits morphologisch festgesetzt – und nicht erst argumentativ ausgehandelt – er scheint bekannt und vertraut. Desgleichen offenbaren sich Festsetzungen durch Komposita wie *Qualitätsstandard*<sup>89</sup>, *Qualitätsmerkmal* oder *Qualitätsansatz*. Weitere Aussagen suggerieren, dass das Konzept ›Qualitätsträger‹ zuvor bereits auf mentaler Ebene evoziert wird:

Unser Qualitätsverständnis beinhaltet auch die Betreuungsqualität: Patienten sollen medizinisch und pflegerisch optimal versorgt werden. (Fresenius GB 2010)

Durch diese Konzeptualisierung wird eine kultursymbolische Aufwertung von QUALITÄT möglich, was der Ausdruck *Qualitätskultur* aufgreift:

Wir glauben, dass Siemens für eine Qualitätskultur steht, die den Kunden und seine Anforderungen in den Mittelpunkt stellt. (Siemens GB 2010)

Betrachtet man die Komposita mit \**qualität* als Determinatum, die das Konzept ›Qualitätsart‹ transportieren, finden sich vor allem Belege bei Unternehmen, die pharmazeutische Produkte oder medizinische Dienstleistungen anbieten und sich auf das Attribut ‚Lebensqualität‘ beziehen (→ 9.2.7.1):

Produkte und Lösungen für mehr Lebensqualität. (Merck Einzigartig – Der Merck Weg)

Auf der Syntagmenebene deutet die häufige Konstruktion *Qualität der X* auf das Konzept ›Qualitätsträger‹ hin. Relativ homogen ist *X* mit *Produkte* oder *Leistungen* ausdrucksseitig besetzt (‚Produkte‘, ‚Leistungen‘):

Unsere Mitarbeiter vor Ort haben über Jahre und Jahrzehnte hinweg Vertrauen aufgebaut. Vertrauen in die Zuverlässigkeit und die Qualität unserer Produkte. (Siemens GB 2010)

Als globaler Netzbetreiber wissen wir, dass die Qualität unserer Leistungen und die Zufriedenheit der Kunden über den Erfolg entscheiden. (Deutsche Post GB 2010)

Diese starke Fokussierung auf das PRODUKT in Verknüpfung mit QUALITÄT bestätigt auch die metasprachliche Reflexion *Begriff für Qualität* von HEIDELBERGCEMENT:

Es ist erklärtes Ziel jedes Mitarbeiters, unsere Produkte und Dienstleistungen weltweit zu einem anerkannten Begriff für Qualität zu machen; diese Positionierung ermöglicht uns die Marktführerschaft. (Heidelberg-Cement Corporate Mission)

*Produkte* und *Dienstleistungen* von HEIDELBERGCEMENT werden hierbei metonymisch für *Qualität* eingesetzt. Durch welches Merkmal sich die PRODUKTQUALITÄT schließlich auszeichnet, wird – außer bei FRESENIUS sowie FRESENIUS MEDICAL CARE – jedoch nicht weiter

---

<sup>89</sup> Vgl. dazu: „Der Heidelberger Qualitätsstandard. Wir bauen auf die Qualität unserer Produkte. Weil sie unser Markenzeichen ist.“ (HeidelbergCement Corporate Mission).

im Diskurs thematisiert, sondern nur die ›Qualitätsart‹ ‚hoch‘ konstatiert:<sup>90</sup>

Bei der Laufzeit von Briefen in Deutschland haben wir erneut eine sehr hohe Qualität erzielt: [...]. (Deutsche Post GB 2010)

Höchste Qualität und damit Zuverlässigkeit und Wirtschaftlichkeit sind Ansprüche, die alle Produkte und Dienstleistungen über ihren gesamten Lebenszyklus begleiten. (MAN GB 2010)

Dieses Bewertungsmuster durch den Superlativ *höchste*\* + X fiel bereits bei TRANSPARENZ auf; der hohe Absolutheitsanspruch wird auch bei folgenden affektiven Adjektiven offenbar:

Nachhaltige Kundenzufriedenheit erreichen wir durch innovative Produkte, marktgerechte Preise und unangreifbare Qualität. (HeidelbergCement Corporate Mission)

Herausragende Qualität unserer Produkte und Lösungen ist ein entscheidender Erfolgsfaktor für unser Unternehmen. (Siemens GB 2010)

Als weiteres regelhaft auftretendes Syntagma zeigt sich *Qualität und X* (›Korrelation von Qualität und X‹):

Qualität und Fortschritt. (Fresenius Auf einen Blick 2010)

X-Füllungen sind dabei häufig *Fortschritt* (‚Fortschritt‘) und *Innovation* (‚Innovation‘), d.h. Ausdrücke, die auf ZUKUNFT referieren und QUALITÄT als maßgeblich bei zukünftigen Entwicklungen konstituieren. Dieser kommissive Anspruch findet sich ebenso auf der Satzebene wieder, wenn *Qualität* musterhaft im Kontext von *Versprechen* (*versprechen*) sowie *verlassen* auftaucht (›Qualitätshandlung‹ ‚Qualitätsversprechen‘):

Das Versprechen „Qualität von Henkel“ gilt für alle Produkte und Leistungen und stellt für die Mitarbeiter eine besondere Verpflichtung dar. (Henkel Corporate Identity)

Solche Aussagen besitzen durch die kommissive Sprachhandlung einen stark verpflichtenden Charakter, d.h. die Unternehmen legen sich auf QUALITÄT fest. In lexikalischer Variation präsentiert MERCK diesbezüglich das Syntagma *Bekenntnis zur Qualität*:

Dabei hat sich Merck mit seinem unbedingten Bekenntnis zur Qualität über Jahrzehnte den Ruf eines verlässlichen und vertrauenswürdigen Partners erworben. (Merck Einzigartig – Der Merck Weg)

QUALITÄT wird daher mit einem ausgeprägten Sicherheitsanspruch (*unbedingten*) konstituiert, wobei die ›Qualitätsart‹ ‚hoch‘ der PRODUKTE im Fokus steht.<sup>91</sup> Mit Diaz Bone (2009, 275) ließen sich Qualitätskonventionen auch als mögliche Differenzierungsprinzipien von Unternehmen sehen, welche jedoch im Diskurs nur unzureichend erfüllt werden, da nur die ‚hohe‘ QUALITÄT konstatiert wird.

---

<sup>90</sup> FRESENIUS sowie FMC nutzen die ›Qualitätsart‹ ‚medizinisch‘ und lehnen sich auch insgesamt mehr an den fachsprachlichen Modus an: „Medizinprodukte und Medikamente sind unmittelbar relevant für die medizinische Qualität. Die HELIOS-Kliniken setzen daher auf eine enge Zusammenarbeit mit ihren Lieferanten und eine hohe Standardisierung der verwendeten Produkte.“ (Fresenius GB 2010); „Damit wir Produkte unternehmensweit flexibel fertigen können, wollen wir zudem alle unsere Standorte mit Rohstoffen und Komponenten in konsistenter Qualität versorgen.“ (FMC GB 2010).

<sup>91</sup> In der Bourdieu’schen Theorie (vgl. Bourdieu 2002, 74) überträgt sich die wahrgenommene Feldposition des Akteurs als Qualitätssignal auch auf dessen Produkte (durch die Logik der Teilhabe).

### **1.2.2.6 Fazit: VERHALTENSEIGENSCHAFTEN**

Die in den letzten Kapiteln dargestellten VERHALTENSEIGENSCHAFTEN fügen UNTERNEHMENSIDENTITÄT folglich eine ‚moralische‘ Komponente hinzu, da Unternehmen sich durch die Behandlung von ETHIK, VERTRAUEN, SICHERHEIT, TRANSPARENZ und QUALITÄT als ‚tugendhaft‘ erweisen und zugleich den Erwartungen der Gesellschaft entsprechen. Weitere Konzepte wie ›ehrbarer Kaufmann‹ werden dadurch mitaufgerufen. Negiert werden negative Bedeutungsassoziationen (z.B. ›Billiglöhne‹, ›Menschenrechtsverletzungen‹ oder ›Massenentlassungen‹). Problematisch ist jedoch bei den aufgeführten VERHALTENSEIGENSCHAFTEN, dass diese häufig nur konstatiert werden und sich in ihrer Realisierung semantisch schwer voneinander unterscheiden lassen.

### **1.2.3 TÄTIGKEITEN**

In den anschließenden Kapiteln werden die TÄTIGKEITEN, die für UNTERNEHMENSIDENTITÄT bedeutsam scheinen, behandelt – LEISTUNG (→ 9.2.3.1) und HANDEL (→ 9.2.3.2):

#### **1.2.3.1 LEISTUNG**

Das Substantiv *Leistung* fällt nicht nur als Hochfrequenzwort sowie *Keyword* im Korpus auf (283 Hits; *Leistung*\* 1.306 Hits), sondern *Leistung*\* wird ausgiebig als erste Konstituente zur Bildung von substantivischen und adjektivischen Komposita genutzt, was aussagt, dass es sich bei LEISTUNG um einen viel thematisierten Sachverhalt handelt (v.a. bei DAIMLER, HENKEL, LINDE und METRO). Es geht dabei vor allem um eine ›Leistungs determinante‹, die durch *Leistungskraft/-stärke* als ‚originär physisch‘ angezeigt wird:

Die Leistungsstärke eines Unternehmens wird in hohem Maße von seiner Kultur beeinflusst. Unser Leitprinzip „Respekt und Resultate“ steht für die tägliche Herausforderung, erstklassige Ergebnisse mit der Verantwortung für die Bedürfnisse unserer Mitarbeiter und Kunden zu verbinden. (Deutsche Post GB 2010)

Im folgenden Beleg wird durch das serielle Adjektiv *leistungsstark*\* ebenfalls das Attribut ‚originär physisch‘ von ›Leistungs determinante‹ aufgerufen und direkt mit METRO (*METRO GROUP, Handelsunternehmen*) verknüpft:

Die METRO GROUP ist ein leistungsstarkes und auf nachhaltiges profitables Wachstum ausgerichtetes, international tätiges Handelsunternehmen. (Metro Corporate Principles)

Insgesamt stärker ausgeprägt ist jedoch die Fokussierung auf die ›Leistungs determinante‹ ‚mental/nicht-physisch‘, die Unternehmen für sich beanspruchen:

Leistungswille. Unsere Strategien konzentrieren sich auf die Bedürfnisse unserer Märkte. Unser Ziel ist profitables Wachstum als Grundlage für nachhaltigen Erfolg. Wir setzen uns ehrgeizige Ergebnisziele und wollen für die, die uns ihr Kapital anvertraut haben, hervorragende Renditen erwirtschaften. (E.ON Cleaner and better energy)

Leistungsbereitschaft | „Sich und andere begeistern“ (HeidelbergCement Unser Unternehmensleitbild)



Die Wörter *Leistungsfähigkeit* und *leistungsfähig\** rufen dagegen prinzipiell beide Attribute (,originär physisch‘ und ,mental/nicht-physisch‘) auf:

Mit einer weiterentwickelten und vereinfachten Struktur sowie nochmals verstärkten Anstrengungen zur Effizienz wird E.ON seine Leistungsfähigkeit weiter steigern. (E.ON GB 2010)

Wir sind dafür verantwortlich, alle Dinge, die wir beeinflussen können, so auszurichten, dass unser Unternehmen seine Potenziale in vollem Umfang ausschöpfen kann. Wir verfolgen ein ganzheitliches Konzept, mit dem wir unser Unternehmen in jeder Hinsicht noch leistungsfähiger machen. (Linde GB 2010)

Dabei bezieht sich der Kontext der Belege zu *Leistungsfähigkeit* und *leistungsfähig\** auf die ›Leistungsträger‹ ,Unternehmen‘, ,Produkte‘ oder ,Mitarbeiter‘, die *leistungsfähiger* werden sollen (,Leistungssteigerung‘) oder ihre *Leistungsfähigkeit* erhalten sollen (,Leistungserhaltung‘). Dass diesen Ausführungen die Präsupposition ›Orientierung am Leistungsprinzip‹ zugrunde gelegt wird, offenbaren weitere Komposita auch direkt auf der Sprachoberfläche (*Leistungsprinzip*, *Leistungsorientierung*):

Wir verfolgen unsere Unternehmensziele ausschließlich nach dem Leistungsprinzip und unter Beachtung der geltenden Wettbewerbsregeln. (BMW Verhaltenskodex)

Leistungs- und Ergebnisorientierung | „Besser sein als andere – Maßstäbe setzen“ (HeidelbergCement Unser Unternehmensleitbild)

In Klassifikationen wird die ›Orientierung am Leistungsprinzip‹ gleichfalls mittels adjektivischen Komposita aufgenommen, wodurch eine Festsetzung des dadurch aufgerufenen Sachverhalts LEISTUNGSORIENTIERTES UNTERNEHMEN geschieht:

Wir fühlen uns als leistungsorientiertes Unternehmen verpflichtet, den Wert unseres Unternehmens zu steigern und unseren Aktionären eine attraktive Rendite zu sichern. (Henkel Vision und Werte)<sup>92</sup>

Auch beim Sachverhalt LEISTUNG kommt die bereits beschriebene kultursymbolische Aufwertung (*Leistungskultur*) wiederum zum Tragen:

Wir erzeugen eine Leistungskultur, leben eine Erfolgsmentalität vor und fördern sie. (BASF Gemeinsam Zukunft gestalten)

Die dadurch konstituierte LEISTUNGSKULTUR wird meist mit ERFOLG verknüpft und in ihrer Typik (›Leistungskulturart‹) noch weiter durch Adjektive (*nachhaltig\**, *positiv\**) charakterisiert:

Hohe Ansprüche stellen wir auch an Leistungsbereitschaft und Leistungserbringung unserer Führungskräfte und Mitarbeiter. Gerade in besonders herausfordernden Zeiten ist eine nachhaltige Leistungskultur die Basis dafür, dass wir auch weiterhin auf Erfolgskurs bleiben. [...] Dazu gehören erreichbare, transparente Ziele, klare Messgrößen und ein regelmäßiges Leistungsfeedback. Damit fördern wir eine positive Leistungskultur, denn neue Ansprüche an uns schaffen auch Chancen für alle. (E.ON Cleaner and better energy)

Bei LINDE wird durch das Syntagma *sportliche Leistungskultur* die LEISTUNGSKULTUR mit der SPORT-Metaphorik verknüpft, wodurch das Konzept ›Fairness‹ mitaufgerufen wird:

Wir honorieren sehr gute Ergebnisse, ganz im Sinne unserer sportlichen Leistungskultur. (Linde GB 2010)

---

<sup>92</sup> Vgl. dazu auch: „Als leistungs- und ergebnisorientiertes Unternehmen legen wir großen Wert auf die Kompetenz unserer Mitarbeiter und Führungskräfte.“ (HeidelbergCement GB 2010).

*Leistungskultur* wird anschließend von SIEMENS auch zu *Hochleistungskultur*<sup>93</sup> aufgewertet. Damit wird direkt auf die ‚Höhe‘ von LEISTUNG referiert, welche durch Komposita wie *Spitzenleistung* und *Höchstleistung* ebenfalls ausgedrückt wird, indem beide Determinativa wertende modale Funktion annehmen:

Der Spitzenleistung verpflichtet – Unsere Werte. (Daimler Verhaltensrichtlinien)

Bei der Linde Group verbinden wir eine lange Tradition mit dem Streben nach ständiger Verbesserung, Innovation und Höchstleistung. (Linde Der Linde Spirit)

INFINEON verbindet das Attribut ‚Höhe‘ durch *Hochleistungsunternehmen* direkt auf Wortebene mit dem eigenen UNTERNEHMEN:

Exzellente Mitarbeiter in einem Hochleistungsunternehmen. (Infineon GB 2010)

Die Wichtigkeit der direkten Verknüpfung von UNTERNEHMEN und LEISTUNG bestätigt sich damit bereits auf der Wortebene. Komposita wie *Leistungsbeurteilung*, *Leistungsindikatoren* und *Leistungsmessung* offenbaren auch ein Interesse der Unternehmen an ‚Leistungsmessung‘, was als Konzeptattribut im Laufe des Kapitels aufgenommen wird:

Wir haben eine Reihe von Leistungsindikatoren festgelegt, an denen wir die Qualität unserer Leistung messen und überwachen, darunter Sicherheit, Produktivität und Lagergenauigkeit. Im Jahr 2010 haben wir weltweit unsere Servicestandards zu mehr als 95 % erreicht. (Deutsche Post GB 2010)

Innerhalb von Syntagmen zeigt sich *Leistung* seltener mit anderen Substantiven als mit Adjektiven verknüpft. Durch *x* (Adjektiv) + *Leistung* wird wiederum das Konzept ›Leistungsart‹ aufgerufen: Es handelt sich dabei meist um dimensionale Adjektive, welche die ‚Höhe‘ von LEISTUNG andeuten:

Vier Modellreihen garantieren kundengerechte Lösungen für unübertroffene Flexibilität mit höchster Leistung. (Daimler Das Unternehmen 2011)<sup>94</sup>

Wir schaffen ein Arbeitsklima, das Menschen motiviert und zu überdurchschnittlichen Leistungen anspornt. (Metro Corporate Principles)

Ebenso zeigen sich Füllungen mit Dispositionsadjektiven (‚zuverlässig‘ oder ‚innovativ‘):

Die Fähigkeit, den Kunden immer zuverlässige und innovative Leistungen zu bieten und die Unternehmensstruktur den veränderten Rahmenbedingungen offen und dynamisch anzupassen, sichert MAN langfristigen Erfolg. (MAN Unternehmensleitbild)

Affektive Adjektive bewerten LEISTUNG (‚gradierend‘):

Durch diese regelmäßige Rückmeldung zu Leistung und Zielerreichung sind wir in der Lage, einerseits die Motivation unserer Mitarbeiter zu stärken und andererseits exzellente Leistungen zu honorieren. (Henkel GB 2010)

Wir bieten herausragende Ingenieursleistung. (Infineon Unsere Werte)

Schließlich verorten weitere Adjektive (*unternehmerisch\**, *gesellschaftlich\**, *ökologisch\**,

---

<sup>93</sup> Vgl. dazu: „Förderung einer Hochleistungskultur [...]“. (Siemens GB 2010).

<sup>94</sup> Vgl. dazu auch den Fachterminus (*High*) *Performance*: „Mit der Einführung des Infineon Compass und ersten Maßnahmen mit Fokus auf den High-Performance-Gedanken haben wir bereits wichtige Schritte in Richtung Gipfel gemacht und werden auch in Zukunft die Entwicklung zur High Performance Company aktiv begleiten.“ (Infineon GB 2010).

*sozial*\*) die konstituierte LEISTUNG ‚sektoriell‘:

Nicht zuletzt tragen wir durch die Integration von nachhaltigen Aspekten in unsere operativen Geschäftsprozesse auch zu unserem langfristigen unternehmerischen Erfolg bei. Um dieses zu unterstreichen, berichten wir regelmäßig über unsere unternehmerischen, gesellschaftlichen und ökologischen Leistungen sowie die Fortschritte, die wir dabei erzielen. (E.ON Cleaner and better energy)

Die Trias *unternehmerische\**, *gesellschaftliche* und *ökologische\* Leistung\** suggeriert dabei, dass die Verknüpfung der Sachverhalte WIRTSCHAFT, GESELLSCHAFT und ÖKOLOGIE, für die E.ON eine LEISTUNG erbringt, maßgeblich ist (→ 9.2.14).

Als nächstes lässt sich auf der Satzebene durch die Kookkurrenz von *Leistung* mit *messen* die ›Leistungshandlung‹ der ‚Leistungsmessung‘ bestätigen:

Regeln und Instrumente, mit denen wir Leistung einfacher messen und so Erfolg besser sichtbar machen wollen, unterstützen diesen Prozess. Dazu gehören erreichbare, transparente Ziele, klare Messgrößen und ein regelmäßiges Leistungsfeedback. (E.ON Cleaner and better energy)

Wiederum begegnet man auch ‚Leistungssteigerung‘:

Wir steigern systematisch unsere Leistung und Effizienz, indem wir fortlaufend eigene klinische Behandlungsdaten erheben und miteinander vergleichen, nach externen wie internen Qualitätsstandards arbeiten und unsere Kliniken professionell führen. (FMC GB 2010)

‚Leistungsbelohnung und -anerkennung‘ findet sich meist in Bezug auf MITARBEITER:

Wir fordern Leistung voneinander und honorieren diese entsprechend. (Merck Leitbild)

‚Leistungsbelohnung und -anerkennung‘ ist jedoch häufig gekoppelt mit ‚Leistungseinforderung‘ (*Wir fordern Leistung*), was in diversen Aussagen formelhaft aufgenommen wird (*fördern und fördern*):

Leistung fordern und fördern. (E.ON Cleaner and better energy)

Die Analyse der Satzebene verstärkt infolgedessen den Eindruck, dass eine starke konzeptuelle Orientierung am Konzept ›Orientierung am Leistungsprinzip‹ herrscht – zudem unterstützen diese Erkenntnis solche Belege, in denen *Leistung* als Agens auftritt:

Leistung ermöglicht unseren unternehmerischen Erfolg. (Merck Merck Werte)

Leistung bestimmt unser Handeln. (Deutsche Bank Leitbild und Marke)

Der letzte Beleg von DEUTSCHE BANK unterstreicht durch *bestimmt* die Wichtigkeit von LEISTUNG für das gesamte unternehmerische HANDELN von DEUTSCHE BANK. Auf der Textebene wird dies unter einem Sachverhaltsfestsetzungsversuch nochmals aufgegriffen (*Verständnis von Leistung*, [...] *macht unsere Leistung aus, Leistung aus Leidenschaft*):

Leistung: Zu unserem Verständnis von Leistung gehört es, Neuem gegenüber aufgeschlossen zu sein. Die Verbindung von Passion und Präzision macht unsere Leistung aus und gibt uns das Selbstbewusstsein, Neues offensiv anzugehen [...] „Leistung aus Leidenschaft“ ist deshalb mehr als ein Slogan – es ist die Art, wie wir handeln. Als EINE Bank. (Deutsche Bank Leitbild und Marke)

Die Dominanz des Substantivs *\*leistung\** verweist daher insgesamt auf LEISTUNG als ‚Ergebnis‘, während das Verb *leisten* viel seltener im gesamten Korpus vorkommt. Folglich wird die Prozessperspektive (*leisten*) weniger betont als vielmehr das erzielte ›Leistungser-

gebnis< der Unternehmenstätigkeit (*Leistung*). Verstärkt wird diese Konzeptualisierung auf der Textebene nochmals durch die Formulierung *Leistungsversprechen*:

Qualität, Innovation und Effizienz sind die Eckpunkte der Vision des Konzernleitbildes und damit das verbindende Element im gesamten Konzern. Es ist das gemeinsame Leistungsversprechen an die Kunden. (Telekom T-Spirit – Das Leitbild der Deutschen Telekom)

Durch *Leistungsversprechen* wird Anspruchsgruppen (*Kunden*) insofern ex ante eine hohe Sicherheit in Bezug auf die bevorstehende LEISTUNG von Unternehmensseite suggeriert. Das Kapitel zeigt damit auch, dass LEISTUNG zum grundlegenden Identitätsprinzip von Unternehmen erhoben wird (>Orientierung am Leistungsprinzip<), unter Dominantsetzung von ‚Leistungssteigerung‘ sowie ‚Höhe‘ der LEISTUNG.

### 1.2.3.2 HANDEL

Als weitere TÄTIGKEIT von Unternehmen wird auf HANDEL verwiesen, was besonders in Texten von DEUTSCHE BÖRSE, METRO und E.ON auffällt, die damit das Konzept >Kaufen und Verkaufen von Waren und Dienstleistungen< als *Commercial-Event-Frame* (vgl. Mautner 2010, 215) aufrufen. Dies geschieht mittels des Substantivs *Handel* (288x) sowie Komposita, die *Handel\** als erste Konstituente beinhalten:

Die Börse ist ein Marktplatz. Sie bringt die Handelswünsche von Käufern und Verkäufern zusammen. (Deutsche Börse Vom Parkett zum elektronischen Handelsplatz)

Je höher die Liquidität des Marktes, je größer die Zahl der handelnden Unternehmen, desto verlässlicher die im täglichen Handelsgeschäft an den Börsen entstehenden Preissignale. (E.ON Cleaner and better energy)

Weitere lexikalische Repräsentationen finden sich auch durch *Händler\** sowie das Tätigkeitsverb *handeln*:

Die Händler und Risikomanager sorgen für den bestmöglichen Einsatz der europäischen E.ON-Kraftwerke, handeln und beschaffen weltweit Rohstoffe und CO<sub>2</sub>-Zertifikate zum Betrieb dieser Kraftwerke und sichern künftige Strommengen schon heute im Voraus preislich ab. (E.ON Cleaner and better energy)

Auf den Sachverhalt HANDEL verweisen ferner *\*kauf\**<sup>95</sup> und *\*vertrieb\**:

Während wir in Nordamerika ähnliche Produkte wie in Europa verkaufen, haben die Verbraucher in Latein- und Südamerika andere Wünsche und Bedürfnisse. (BDF GB 2010)

In der Value University, einer virtuellen Schulungsumgebung, können sich Mitarbeiter aus dem Vertrieb und dem Vertriebsinnendienst in rollenspezifischen Kursen grundlegendes Wissen aneignen und wichtige Verkaufsinstrumente kennenlernen. (SAP GB 2010)

Brünner spricht vom VERKAUF als der wichtigsten Schnittstelle zwischen Unternehmen und Kunden, als „Austausch von Ware gegen Geld als Voraussetzung für die Realisierung eines Gewinns“ (Brünner 2009, 160f.). Daraus entstehen unmittelbare bezifferbare ökonomische Auswirkungen. Dennoch wird der Sachverhalt VERKAUF bzw. HANDEL im Diskurs seltener versprachlicht als die bisher aufgeführten Sachverhalte. DEUTSCHE BÖRSE und METRO können

---

<sup>95</sup> Vgl. zum Ausdruck *Einkauf* das Kapitel → dieser Anhang, 1.7.3 (WERTSCHÖPFUNGSKETTE). Im weiteren Sinne verweist darauf auch *Geschäft\**: „Unser spezielles Knowhow versetzt uns in die Lage, auch in Zukunft neue und profitable Geschäftsfelder besetzen zu können.“ (Munich Re Strategie).

diese Tatsache der geringen Ausprägung demzufolge nutzen, um HANDEL als Sachverhalt (u.a. lexikalisch) an ihr UNTERNEHMEN zu binden, d.h. sich als ›Handelsinstanz‹ Identität zuzuschreiben: Bei DEUTSCHE BÖRSE geschieht dies durch die rekurrente Wiederaufnahme des Substantivs *Handel*\* durch *Handelsplattform*, *Handelsplatz/-plätze*, *Handelssystem* sowie dem Verb *handeln*, aufgrund derer die DEUTSCHE BÖRSE sich als UNTERNEHMEN kategorisiert:

Börsen gehören zu den ältesten Handelsplätzen der Welt – und zu den modernsten. (Deutsche Börse Vom Parkett zum elektronischen Handelsplatz)

Bereits auf Makroebene schildert der Texttitel *Vom Parkett zum elektronischen Handelsplatz* die Konzeptualisierung als ›Handelsinstanz‹, die im weiteren Textverlauf an den Lexemverband *\*handel\** gekoppelt wird, sodass sich folgende Ausdifferenzierungen finden:

- *Handelsplattform*, *Handelsplatz*, *Handelsgeschehen*, *Handelswünsche*, *Handelsauftrag*, *Handelssystem*, *Handelsgegenstand*, *Handelsinformationen*, *Aktien- und Terminhandel*, *Wertpapierhandel*, *Händler*, *handeln*, *gehandelt*, *handelnde Parteien*, *handelbar*, *börsengehandelt*.

Bei DEUTSCHE BÖRSE wird auch der *Commercial-Event-Frame* lexikalisch bedient:

- *Käufer*, *Verkäufer*, *Waren*, *Markt*, *Marktplatz*, *Geschäft*, *Geld*, *Gutschrift*, *Kundendepot*, *Wertpapiere*, *Verwaltung*, *Produkte*, *Emittenten*, *Anleger*, *Lieferung*, *Abnahme*, *Bezahlung*, *Preis*, *Kaufoption*, *Verkaufsoption*, *Anleihe*, *Devisen*, *Ware*, *vermarktet*, *gekauft*, *verkauft*, *organisiert*, *gebucht*, *abgerechnet*, *tauschen*, *handeln(de)*.

Ebenso werden rezipientenorientierte Begriffsbestimmungen der ›Handelsinstanz‹ und der ›Handelstätigkeit‹ von DEUTSCHE BÖRSE vorgenommen:

Was passiert beim Aktienhandel? (Deutsche Börse Vom Parkett zum elektronischen Handelsplatz)

METRO dagegen nutzt keine mehrdimensionale Fütterung des Konzeptes ›Handelsinstanz‹, sondern wählt festsetzende Klassifikationen mittels der *als*-Phrase (→ 8.2.2):

Denn wir verstehen uns in erster Linie *als Handelsunternehmen*, das sich konsequent an den Bedürfnissen seiner Kunden ausrichtet. (Metro GB 2010)

Als Handelsunternehmen ist die METRO GROUP im Alltag vieler Menschen präsent. (Metro GB 2010)

Der unternehmenseigene *Claim* von METRO *Made to Trade* verknüpft diese Aussage auf Makroebene. Im Deutschen nimmt die Substantivierung *Zum Handeln geschaffen* die Proposition auf:

Unser langfristig profitables Wachstum basiert auf fünf strategischen Werttreibern: Kundenorientierung, Internationalisierung, Effizienz, Nachhaltigkeit und Innovation. Sie spiegeln sich in unserer Markenbotschaft „Zum Handeln geschaffen.“ wider. (Metro GB 2010)

Betrachtet man weitere Komposita mit *\*handel\**, finden sich ›Handelsorte‹ auch bei anderen Unternehmen, z.B. bei DEUTSCHE POST und E.ON:

Außerdem bietet ein größeres Marktgebiet mit zentralen Handelsplätzen und einheitlichen Regeln greifbare

Vorteile für alle Seiten: Für Industrie und Privatkunden: Denn im europäischen Wettbewerb werden alle Erzeugungsanlagen optimal eingesetzt. (E.ON Cleaner and better energy)

Noch deutlicher hat sich der Welthandel erholt: Er hat um rund 12 % zugelegt (IWF: 12,0 %, OECD: 12,3 %). (Deutsche Post GB 2010)<sup>96</sup>

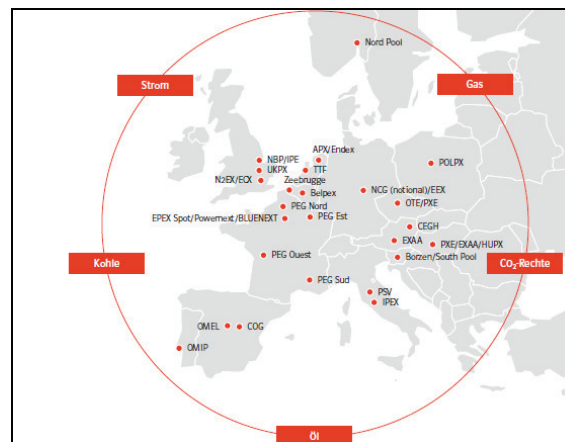

Abbildung 87 - E.ON Cleaner and better energy

Die Integration des Konzeptes ›Handelsorte‹ ‚Europa‘ wird bei E.ON zugleich durch die Text-Bild-Ebene (→ Abb. 87) verstärkt, indem der /rote Kreis/ bildlich einen Großteil von EUROPA abdeckt und gleichzeitig sprachlich PRODUKTE von E.ON integriert (*Strom, Gas, CO<sub>2</sub>-Rechte, Öl, Kohle*). Diese Lokalisierung wird von E.ON auf der Syntagmenebene weitergeführt (*Welt des globalen Energiehandels*):

E.ON nimmt schon jetzt die Chancen wahr, die sich in einer zusammenwachsenden Welt des globalen Energiehandels bieten. (E.ON Cleaner and better energy)

Auffallend ist letztlich, dass *handeln* bzw. *Handeln* ansonsten kaum in der Bedeutung ‚Kaufen und Verkaufen von Waren und Dienstleistungen‘ genutzt werden, sondern auf die generalisierende Bedeutung ‚bewusstes Tätigwerden aufgrund eines Entschlusses‘ hinweisen:

Mit der optimalen Auslastung der Maschinen handeln wir im Sinne der Nachhaltigkeitsstrategie des Konzerns und tragen dazu bei, die Klimaschutzziele zu erfüllen. (Deutsche Post GB 2010)

Dieses Konzeptattribut taucht gehäuft in den Verbindungen *unternehmerisch\*/verantwortlich\*/nachhaltig\* + Handeln\*/handeln* auf:

Für unseren Erfolg ist ein gemeinsames Verständnis unseres unternehmerischen Handelns Voraussetzung. (Henkel Vision und Werte)

Solche Aussagen sind wiederum der starken Akteursfokussierung des Diskurses dienlich, d.h. sie unterstreichen die Selbstreferentialität der UNTERNEHMEN, indem diese ihr HANDELN (ihre TÄTIGKEITEN) an sich zurückbinden. Dennoch können DEUTSCHE BÖRSE, METRO und E.ON den Sachverhalt HANDEL auch in der kommerziellen Bedeutung für ihre Individualisierung von UNTERNEHMENSIDENTITÄT einsetzen.

<sup>96</sup> Andere Komposita mit *\*handel\** verweisen auf ›Handelsgliederung‹: „Während in westeuropäischen Märkten die Handelsstrukturen bereits vollständig ausgebaut sind, befinden sich die osteuropäischen, asiatischen und afrikanischen Länder in unterschiedlichen Entwicklungsstadien.“ (Metro GB 2010).



## 1.2.4 EXPERTISE

Das folgende Kapitel behandelt die EXPERTISE, die UNTERNEHMEN sich in ihrer Identitätskonstruktion zuschreiben: durch WISSEN (→ 9.2.4.1) und FORSCHUNG (→ 9.2.4.2).

### 1.2.4.1 WISSEN

Die Unternehmen im Korpus beziehen sich vielfach auf ihr immenses (gesammeltes) (FACH-)WISSEN, was durch die lexikalischen Repräsentationen *\*wissen*, *Kompetenz*, *Know-How*, *\*erfahrung* und *\*forschung* sowie in Positionierungsstrategien (ERFINDER-Mythos<sup>97</sup>) geschieht:

Innovationen sowie die Gesamtheit unseres Wissens und unserer Erfahrungen bilden die Grundlage für die Entwicklung und Herstellung attraktiver Produkte und Dienstleistungen der BMW Group. (BMW Verhaltenskodex)

Dank unseres Know-hows und unserer Innovationskraft können wir nicht zuletzt Lösungen für den Klimaschutz und den Umgang mit den Folgen des Klimawandels bieten. (Bayer Namen.Zahlen.Fakten 2010/2011)

Teilweise wird WISSEN durch Komposita direkt an das UNTERNEHMEN gebunden, wie LINDE beispielsweise mit *Linde-Kompetenz*<sup>98</sup> veranschaulicht. Auf syntagmatischer Ebene evozieren Adjektivattribute die dahinterstehende ›Wissensart‹:

- ‚qualitativ bedeutsam‘;

Wir wollen mit unserer einzigartigen Erfahrung in der Bereitstellung hochwertiger Dialyseprodukte und -dienstleistungen weltweit der bevorzugte Partner für unsere Patienten und Kunden sein. (FMC GB 2010)

- ‚quantitativ bedeutsam‘;

Im Unterschied zu fast allen Wettbewerbern kann das Unternehmen bei der Planung, der Projektierung und dem Bau von schlüsselfertigen Industrie-Anlagen auf eigenes, umfassendes verfahrenstechnisches Know-how zurückgreifen. (Linde GB 2010)

Auch die Attribute ‚ort- und personengebunden/Fachwissen‘ sowie ‚temporal spezifiziert‘ werden thematisiert;

Das globale und lokale Knowhow unserer rund 11.400 Mitarbeiterinnen und Mitarbeiter in der Rückversicherung ist einzigartig. (Munich Re)<sup>99</sup>

Im vergangenen Geschäftsjahr unterstrichen erfolgreiche Projektabschlüsse im SAP- Umfeld das Know-how und die langjährige Erfahrung von Lufthansa Systems. (Lufthansa GB 2010)<sup>100</sup>

Auf der Satzebene zeigen sich (in Verbindung mit *\*wissen*, *Kompetenz*, *Know-How* und *\*erfahrung*) regelhaft Kookkurrenzen mit Verben wie *weitergeben* oder *vermitteln*, welche die ›Wissenshandlung‹ der ›Wissensweitergabe‹ aufrufen:

Linde verfügt auf diesem Gebiet über umfassende Kompetenzen und vermittelt dieses Wissen seinen Kunden und Nachwuchskräften. (Linde GB 2010)

---

<sup>97</sup> Vgl. dazu *\*wissen* (245x), *kompeten*\* (351\*), *\*know-how* (154x), *\*erfahrung* (152x) und *\*forschung*\* (545x); vgl. dazu auch den Personen- und Ereignismythos – ERFINDER und ERFINDUNG (→ 8.2.3.5.5.1).

<sup>98</sup> Vgl. dazu: „Linde-Kompetenz weltweit gefragt.“ (Linde GB 2010).

<sup>99</sup> Vgl. dazu auch: „Vor allem in kreativen Prozessen sowie auf dem Gebiet der virtuellen Techniken und der Megatrends bietet sich uns die Möglichkeit, auf externes Fachwissen zurückzugreifen.“ (VW GB 2010).

<sup>100</sup> Vgl. dazu auch: „Mit unserem über 100 Jahre gewachsenen Know-how machen wir die Ressourcen des Bodens für uns alle effizient nutzbar.“ (K+S GB 2010).

Muster mit *verfügen über, haben* sowie *(be)wahren* setzen dagegen die Bedeutung ‚Wissensbesitz und -konservierung‘ dominant:

Als weltweit einziger Hersteller verfügt der Sektor Energy über das Know-how, die richtigen Produkte, Lösungen und Kernkomponenten entlang der gesamten Energieumwandlungskette. (Siemens GB 2010)

Für einen Technologie-Konzern wie Linde ist es wichtig, das durch die Mitarbeiter über die Jahre gesammelte Wissen im Unternehmen zu bewahren. (Linde GB 2010)

Besonders der Beleg von LINDE setzt das Bedeutungsmerkmal ‚konservierend‘ durch die intrinsische Perspektivierung *im Unternehmen* dominant, sodass sich geradezu von ‚Wissenssicherung‘ sprechen ließe, was *Container*-Metaphern aufgreifen:

Neben der gezielten Aus- und Weiterbildung ist es entscheidend, das Bewusstsein unserer Mitarbeiter für unternehmensspezifisch wichtige Erkenntnisse zu schärfen und das im Unternehmen vorhandene Wissen noch besser zu erfassen, zu nutzen und zu sichern. (K+S GB 2010)

In Zusammenhang mit dem Verb *bündeln* wird das Attribut ‚Wissensfassung‘ aufgerufen:

Wir beschäftigen Experten aus nahezu allen Bereichen der Forschung und bündeln unser Knowhow in speziellen Kompetenzzentren. (Munich Re Strategie)

Die Komposita *Wissensbündelung*, *Wissensweitergabe* und *Wissensmanagement*<sup>101</sup> sowie die Syntagmen *Beschaffung/Transfer/Austausch/Weitergabe/Transformation von Wissen/Know-How*<sup>102</sup> validieren ebenso die aufgefundenen Attribute. Gleichzeitig evozieren sie jedoch das tieferliegende Konzept ›Wissensmaterialisierung‹, denn WISSEN wird durch eine solche sprachliche Zubereitung analog zu den Stadien einer RESSOURCENKETTE perspektiviert und als ‚materielle Ressource‘ dargestellt, die in verschiedene PROZESSE (*Beschaffung, Transfer, Austausch* und *Weitergabe*) eingebunden ist. Die häufig gebrauchten Metaphern *Ressourcen* und *Investition in Wissen*<sup>103</sup> scheinen in diesem Zusammenhang auch von essentieller Bedeutung.

Zuletzt ist in diesem Kapitel noch zu erwähnen, welche ›Wissensträger‹ genannt werden, die sich auf der Satzebene durch Prädikationen anzeigen. Ein ›Wissensträger‹ ist zahlreich die *wir*-Gruppe, die metonymisch auf das ‚Unternehmen‘ rückverweist:

Wir sind Experten und Technologieführer in hoch spezialisierten Produktfeldern, von Flüssigkristallen bis hin zu biotechnologischen Medikamenten. (Merck Einzigartig – Der Merck Weg)

---

<sup>101</sup> Vgl. dazu etwa: „Lindes Engineering Division setzt dazu auf ein System der Wissensweitergabe und Vertiefung von Fachkenntnissen, das über zwei Jahrzehnte gewachsen ist. Kernpunkt dieses Ansatzes ist ein so genanntes Tandem: Dabei bilden jeweils ein erfahrener und ein jüngerer Mitarbeiter ein Team, das gemeinsam ein Fachgebiet betreut.“ (Linde GB 2010).

<sup>102</sup> Vgl. dazu: „Um im Wettbewerb Vorteile zu erzielen, praktizieren wir Wissensmanagement durch gezielten Austausch von Wissen und Erfahrung. Dieses generieren wir aus internen Projekten, externer Zusammenarbeit und aus Aktivitäten im operativen Geschäft.“ (HeidelbergCement Corporate Mission); „Kernelement ist internationale Beschaffung von Know-how. Es reicht von landesspezifischem Wissen bei der Abwicklung von Investitionsprojekten bis zur weltweiten Erschließung von Innovationen.“ (Bayer Namen.Zahlen.Fakten 2010/2011); „Der kontinuierliche Transfer von Know-How schließt unsere Kunden mit ein.“ (ThyssenKrupp Unsere Werte); „Mit der Weitergabe des umfassenden Wissens durch ältere Mitarbeiter in der täglichen Arbeit können deren Nachfolger zügig in verantwortungsvolle Aufgaben hineinwachsen.“ (Linde GB 2010).

<sup>103</sup> Vgl. dazu: „Eine Investition in Wissen bringt noch immer die besten Zinsen!, wusste bereits Benjamin Franklin.“ (K+S GB 2010).

In Konkurrenz mit *Kompetenz*, *Können* oder *Kenntnisse* wird auch beständig der Ausdruck *Mitarbeiter* („Mitarbeiter“) als ›Wissensträger‹ angeführt (→ 9.2.8.2):

Die große Kompetenz unserer Mitarbeiter in der Forschung und Technik ist ein entscheidender Wettbewerbsfaktor. (HeidelbergCement GB 2010)

Es sind die exzellenten Kenntnisse unserer Mitarbeiter, ihre Erfahrung mit technisch Möglichem und praktisch Machbarem, die Pioniertaten erst erlauben. (Siemens GB 2010)

Weitere Muster, die auf „Mitarbeiter“ als ›Wissensträger‹ hinweisen, finden sich auch im Kontext des Ausdrucks *Idee\**. Vw spricht dabei direkt von *Mitarbeiter als Ideengeber* und verifiziert diese Aussage mit einem Verweis auf PATENTANMELDUNGEN, welche Vw dadurch entstehen:

Mitarbeiter als Ideengeber. Im Geschäftsjahr 2010 meldeten unsere Mitarbeiter 1.969 Patente an, davon 1.250 in Deutschland und 719 im Ausland. (VW GB 2010)

Auch die DEUTSCHE POST stellt einen direkten Bezug zwischen „Mitarbeiter“ als ›Wissensträger‹ durch die Ausdrücke *Ideenmanagement* und *kreative[n] Köpfe[n]* her:

Mit dem Ideenmanagement haben wir ein System geschaffen, mit dem kreative Köpfe auch finanziell vom Erfolg ihrer Ideen profitieren. 2009 haben unsere Mitarbeiter rund 227.000 Vorschläge eingereicht, um Arbeitsprozesse effektiver zu gestalten, Reparatur- und Energiekosten zu senken und den Umweltschutz zu verbessern. (Deutsche Post Werte und Kultur)

Behandelt man den Sachverhalt WISSEN unter Einbezug der Textebene, fällt das Konzept ›Wissensspezialisierung‹ auf. Beispielsweise nutzt K+S narrative Textpassagen, in denen das Stereotyp des BERGMANNS aufgenommen wird, der über (FACH-)WISSEN („Bergbau-Wissen“) verfügt.<sup>104</sup>

Wer die Spezialisten unter Tage beobachtet, merkt, dass alle Arbeiten aufeinander aufbauen und jeder Handgriff sitzen muss. Die Bergleute arbeiten zwar weitgehend auf sich allein gestellt, aber letztlich begreifen sie sich als Team, das nur im Zusammenwirken Erfolg hat. (K+S GB 2010)

Neben diesem „Bergbau-Wissen“ zeigt sich bei MUNICH RE das Konzept ›Wissensspezialisierung‹ im Text *Strategie*, wobei das „Risikowissen“ lexikalisch aufgerufen wird (*Wissensnetzwerk*, *Wissensvorsprung*, *Risikowissen*, *Erfahrungsschatz* *Expertise*, *einzigartiges Wissen*, *spezielles Know-How*). Solche textuellen Isotopielinien tragen dazu bei, dass wiederum das gesamte „Unternehmen“ zum ›Wissensträger‹ wird, was Anthropomorphisierungen bestätigen (*lernende\* Organisation*, *X wollte wissen*):

Mitarbeiter, Arbeitnehmervertreter und Management haben es sich zur Aufgabe gemacht, das Unternehmen gemeinsam zu einer lernenden Organisation weiterzuentwickeln. (VW GB 2010)

2010 erarbeitete MAN in Kooperation mit „The Economist“ eine weltweite Studie zur Zukunft des Transports. MAN wollte wissen, wo die internationale Transport- und Logistikbranche den größten Handlungsbedarf sieht. (MAN GB 2010)

Vw und MAN werden durch solche Aussagen als UNTERNEHMEN zu eigenen epistemischen Systemen. Dass diese positive Aufwertung bis hin zur Perspektivierung von UNTERNEHMEN

---

<sup>104</sup> Vgl. dazu Spezifische Zeit- und Raummythen (→ 8.2.3.5.5.4).

als INSTITUTION der WISSENSCHAFT gehen kann, wurde bereits in Kapitel → 8.2.3.4 aufgeführt. Auch Bezeichnungen wie *Linde University*, *Lufthansa School of Business* oder *Corporate University*<sup>105</sup> lehnen sich daran an. Damit erschaffen sich UNTERNEHMEN selbst als „kybernetische Wissenssysteme“ (Bungarten 1997, 37).

#### 1.2.4.2 FORSCHUNG

Eng verbunden mit WISSEN ist der Sachverhalt FORSCHUNG (*Forschung* ist *Keyword* und Hochfrequenzwort), wobei dabei noch stärker die Bedeutungsmerkmale ‚Wissenschaft‘ (z.B. *Forschung und Entwicklung*, *Labor*) sowie ‚Erstmaligkeit‘ (z.B. *erfind\**, *innovati\**, *Pionier\**) aufgerufen und diesbezüglich lexikalische Repräsentationen gewählt werden. Vor allem BEIERSDORF, BAYER, DAIMLER, Vw, E.ON sowie K+S gebrauchen diese Bezugnahme; am häufigsten sind dabei die Ausdrücke *Forschung/en* sowie die Verknüpfung *Forschung und Entwicklung* vertreten. Des Weiteren finden sich diverse Komposita mit *Forschung\** als erster Konstituente, z.B. *Forschungsqualität*, *Forschungskompetenz* oder *Forschungsaktivität/en*:

Mehr als 125 Jahre Forschungskompetenz. (BDF Imagebroschüre)

Solche Bezugnahme lehnen sich an den Status einer INSTITUTION der WISSENSCHAFT an, der dahingehend hohe epistemische Autorität übertragen wird (→ 8.2.3.4). Weitere Komposita beziehen sich auf konkrete ›Forschungsorte‹ der Unternehmen:

IdeenVielfalt. In unseren Forschungslaboren rund um den Globus hat die Mobilität von morgen bereits begonnen – und sie ist intelligenter, vernetzter und vielfältiger denn je. (VW GB 2010)

BEIERSDORF erwähnt beispielsweise das *Asien-Labor* sowie ein *Hautforschungszentrum*<sup>106</sup>, wodurch die eigene FORSCHUNG an KONTINENTE sowie PRODUKTE geknüpft wird. K+S betont durch das Syntagma *eigenes Forschungsinstitut* im folgenden Beleg zusätzlich das Attribut ‚besitzanzeigend‘:

Wir betreiben in Deutschland ein eigenes Forschungsinstitut mit den Schwerpunkten Aufbereitung, Verfahrenstechnik und Analytik. (K+S GB 2010)

Darüber hinaus wird FORSCHUNG in strategische Maßnahmen eingebunden (›Forschungsstrategien‹), was sich wiederum an den ökonomischen Diskurs anlehnt:

Als Teil unserer Forschungs- und Entwicklungsstrategie haben wir die „Open Innovation“ (offene Innovation) weiterentwickelt, das heißt die stärkere Einbindung von Universitäten, Forschungsinstituten, Lieferanten und Kunden in unseren Innovationsprozess. (Henkel GB 2010)

---

<sup>105</sup> Vgl. dazu: „Unter dem Dach der Linde University hat das Unternehmen ein internationales Trainingsprogramm für die Führungskräfteentwicklung und das Talent Management eingerichtet.“ (Linde GB 2010); „Die Lufthansa School of Business (LHSB), seit 1998 Deutschlands erste Corporate University, optimierte 2010 insbesondere die fachübergreifenden Trainings im Konzern. Dabei konnten die Mitarbeiter der Verbund-Airlines das Angebot ebenfalls weitestgehend nutzen.“ (Lufthansa GB 2010).

<sup>106</sup> Vgl. dazu: „Bereits im Jahr 2005 ein Asien-Labor eingerichtet, das Produkte für die lokalen Absatzgebiete entwickelt.“ (BDF GB 2010); „Ein großer Teil der Forschungsarbeit erfolgt in unserem Hautforschungszentrum in Hamburg, das zu den weltweit modernsten seiner Art gehört.“ (BDF Imagebroschüre).

Wie der Beleg zeigt, wird auch mit *Innovation\** (→ 9.2.9.2) das Konzept ›Forschungsstrategien‹ aufgerufen:

Hierzu bedarf es auch einer offenen Innovationsstrategie – »Open Innovation« –, die hilft, weltweit Synergien zu erschließen, die Kosten-, Innovations- und Wettbewerbsvorteile ermöglichen. (Siemens GB 2010)

Bei der Formulierung auf Satz- und Textebene wird FORSCHUNG in relativ vage Aussagen eingebettet: K+S sowie FRESSENIUS MEDICAL CARE gehen zwar auf ›Forschungsergebnisse‹ ein, wobei die genaueren Modalitäten jedoch ausgespart werden, was die Ergebnisse aus dem Kapitel Bezugnahme auf STUDIEN und WISSENSCHAFT (→ 8.2.3.4) bestätigt:

Die Labor- und Felduntersuchungen sind im Jahr 2010 abgeschlossen worden. Es zeigte sich, dass im Gesamtsystem Boden/Pflanze eine optimale Versorgung vor allem mit Kalium die Fähigkeit zur Wassernutzung verbessern kann. Somit spart die Kaliumdüngung Wasser, d.h. mit einer vorhandenen Wassermenge kann mehr Ertrag erzielt werden bzw. für einen zu erzielenden Ertrag wird weniger Wasser benötigt. Es konnten die Ursachen dieses Zusammenhanges aufgedeckt werden. Die ausführlichen wissenschaftlichen Ergebnisse werden im Jahr 2011 in renommierten Fachzeitschriften veröffentlicht und bilden die Basis für ein besseres Verständnis der Wirkung von Nährstoffen und führen letztlich zu verbesserten Düngungsempfehlungen. (K+S GB 2010)

Diese vagen Aussagen (*Es konnten die Ursachen [...] aufgedeckt werden*) unterstreichen die Vermutung, dass für die untersuchten Unternehmen die Strategie der Aufwertung zur INSTITUTION der WISSENSCHAFT im Vordergrund steht, während Details (›Forschungsergebnisse‹) ausgeklammert oder nicht konkretisiert werden. Dagegen wird im Terminalteil der Repräsentationstexte vielmals das Konzept ›Forschung als Ausgangsbasis für zukünftige Produktentwicklungen‹ aufgerufen, wodurch FORSCHUNG nicht dem Erkenntnisgewinn, sondern der ökonomischen Logik untergeordnet wird. Dass FORSCHUNG vor allem der PRODUKTENTWICKLUNG dienlich ist, belegen die Kookkurrenzen von *Forschung\**, *entwickeln/Entwicklung\** und *Produkte\** (v.a. bei DAIMLER, FRESSENIUS MEDICAL CARE und HENKEL):

Angesichts des durchgreifenden technologischen Wandels, dem die gesamte Automobilbranche gegenübersteht, ist eine erfolgreiche Forschungs- und Entwicklungsarbeit ein wesentlicher Faktor für den künftigen Unternehmenserfolg. Unsere Forschung antizipiert Trends, Kundenwünsche und Anforderungen an die Mobilität der Zukunft, die von der Entwicklung konsequent in serienreife Produkte umgesetzt werden. (Daimler GB 2010)

Daher wird auch kollektiv der Unternehmensbereich FORSCHUNG UND ENTWICKLUNG (*F&E*) in seiner Wichtigkeit bewertet (*hohe\* X*):

Unsere Ziele auf den Gebieten Klimaschutz, Energieeffizienz und Versorgungssicherheit erreichen wir nur, wenn wir auf modernste Technologien zurückgreifen können. Daher haben Forschung und Entwicklung (F&E) einen hohen Stellenwert für uns. (RWE GB 2010)

Ständig weiterentwickelte Produkte, Prozesse und Dienstleistungen sind wesentliche Voraussetzungen für ein erfolgreiches Bestehen im Markt. Forschung und Entwicklung besitzen daher hohe Priorität für Thyssen-Krupp. (ThyssenKrupp GB 2010)

Schließlich wird FORSCHUNG UND ENTWICKLUNG direkt mit WISSEN verknüpft, indem das WISSEN des Unternehmens daraus abgeleitet wird, was BEIERSDORF mit der Metapher *Quelle* sprachlich unterstützt:



Der Bereich Forschung und Entwicklung ist und bleibt die Quelle für die vorbildliche dermatologische Kompetenz und die hohe Innovationsrate von Beiersdorf und seinen Marken. (BDF Imagebroschüre)

Dass FORSCHUNG ein gewichtiger Teil von UNTERNEHMENSIDENTITÄT ist, bestätigen demgemäß Aussagen, die explizit auf das Nicht-Vorhandensein eines Bereichs FORSCHUNG UND ENTWICKLUNG hinweisen:

Da der Konzern als Dienstleistungsunternehmen keine Forschung und Entwicklung im engeren Sinne betreibt, sind hierzu keine nennenswerten Aufwendungen zu berichten. (Deutsche Post GB 2010)

Als Handelsunternehmen betreibt die METRO GROUP keine Forschung und Entwicklung im engeren Sinn. (Metro GB 2010)

Die Identitätskonstruktion findet in beiden Belegen durch Abgrenzung (*keine Forschung und Entwicklung*) statt und betont dagegen die Rollenzuschreibung durch *Dienstleistungsunternehmen* und *Handelsunternehmen*.

Das übergeordnete Kapitel EXPERTISE zeigte somit, dass Unternehmen ihre Informationen zu relevantem WISSEN veredeln und FORSCHUNG eine erfolgskritische Schlüsselkompetenz in ihrer Produktentwicklung ist, was basal auf UNTERNEHMENSIDENTITÄT einwirkt, denn WISSEN und die Teilhabe an WISSEN ergeben wirtschaftliche Wertschöpfung als Handlungsziel von Unternehmen (vgl. Bergmann 2011).

### 1.2.5 NORMEN UND PRINZIPIEN

Unternehmen verweisen auf NORMEN UND PRINZIPIEN, um den Sachverhalt UNTERNEHMENSIDENTITÄT zu legitimieren und zu stützen (vgl. Brudler 1993, 105). Die folgenden Kapitel behandeln daher WERTE (→ 9.2.5.1), KULTUR (→ 9.2.5.2), NACHHALTIGKEIT (→ 9.2.5.3), VERANTWORTUNG (→ 9.2.5.4) und VERPFLICHTUNG (→ 9.2.5.5).

#### 1.2.5.1 WERTE

WERTE dienen als Orientierungsperspektiven für unternehmerisches Handeln. Sie werden meist verstanden als

implizite oder explizite Auffassungen, die ein Individuum, eine Gruppe bzw. Organisation oder eine Gesellschaft von Wünschenswertem oder Erstrebenswertem vertritt. (Mast/Huck-Sandhu/Hubbard 2008, 91)<sup>107</sup>

Diese WERTE können unterschiedlich wissenschaftlich eruiert werden, was in dieser Arbeit anhand der sprachlichen Repräsentation des Sachverhalts WERTE im Diskurs vorgenommen wird.<sup>108</sup> Das Substantiv *Werte* (422x; \*werte\* 1.264x) taucht dabei nicht nur als *Keyword* und

---

<sup>107</sup> Vgl. dazu auch Keupp (2012, 48): „Werte und Lebenssinn stellen Orientierungsmuster für die individuelle Lebensführung dar. Sie definieren Kriterien für wichtige und unwichtige Ziele, sie werten Handlungen und Ereignisse nach gut und böse, erlaubt und verboten.“ Auf die Polysemie von *Werte* wird im Kapitel eingegangen.

<sup>108</sup> Vgl. dazu Gunnarsson (2010, 172): “The values of an organisation will [...] be revealed by the various texts it produces.” Konerding (2008) sowie Schwegler (i.V.) untersuchen argumentative Tiefenstrukturen, um auf klassifizierbare Wertehintergründe zu kommen. Vgl. weiterführend Karmasin (2004, 351f.) zu „Wertsphären“ sowie Schwartz (1994), die 56 Werte mit zehn übergeordneten Wertekategorien auffindet.



Hochfrequenzwort im Korpus auf, sondern ist auch aktiv in die Wortbildung der Diskurslexik durch Komposita integriert:

Der *Wertekatalog* von Henkel umfasst zehn Punkte, die für alle Mitarbeiter weltweit verbindlich sind. (Henkel Corporate Identity)

Neben *Wertekatalog* zeigen sich mit dem Determinans *Werte\** u.a. *Wertekanon*, *Wertekultur*, *Wertesystem*, *Wertordnung*, *Wertewandel* oder *werteorientiert\**; als Determinatum mit *\*werte* finden sich *Unternehmenswerte*, *Konzernwerte*, *Grundwerte*, *Kernwerte* und *Leitwerte*. Diese Vielzahl an Formen lässt vermuten, dass WERTE ein bedeutsamer Sachverhalt für die Konstruktion von UNTERNEHMENSIDENTITÄT ist, dem daher auch eine eigene Textsorte (*Werte*) gewidmet wird (→ 5.2.2.3). Neben Komposita dienen der Sachverhaltsfestsetzung<sup>109</sup> von WERTE auch Neologismen wie *ComWerte* (COMMERZBANK *Die Werte der Commerzbank*<sup>110</sup>), wobei *\*werte* in diesem Ausdruck schon auf Wortebene mit einem Teil des Eigennamens *Commerzbank* direkt verknüpft wird und das Attribut ‚besitzanzeigend‘ aufruft. Dadurch werden gleichzeitig auch zwei Wertungen vorgenommen: Erstens wird die Vorlage (*Werte*) positiv konnotiert; zweitens wird auch die COMMERZBANK ethisch aufgewertet, da sie sich für diese Vorlage einsetzt. Dadurch wird an Glaubwürdigkeit gewonnen (vgl. Arnold 2007, 45). Im Fall der COMMERZBANK wird für den genannten Terminus *ComWerte* folgender *Wertekanon* angeschlossen:

**Leistung:** Sowohl individuelle als auch teamorientierte Leistung bilden die Grundlage für unseren nachhaltigen Erfolg.

**Respekt und Partnerschaftlichkeit:** Respekt und Partnerschaftlichkeit prägen unsere Beziehung zu unseren Kunden, Mitarbeitern und Partnern.

**Marktorientierung:** Wir denken und handeln marktorientiert; entscheidend sind dabei die Bedürfnisse und Ziele unserer Kunden.

**Teamgeist:** Zusammenarbeit bedeutet für uns Teamgeist. Weil wir uns als Gemeinschaft den Herausforderungen stellen, können wir uns gemeinsam über die Erfolge freuen.

**Integrität:** Wichtigstes Gut ist unsere Integrität. Sie ist Grundlage des in uns gesetzten Vertrauens und somit von überragender Bedeutung. (Commerzbank *Die Werte der Commerzbank*)

Wie dieses Textbeispiel – stellvertretend für die vielen texthaften Ausformulierungen von WERTE – zeigt, spielt die COMMERZBANK darin auf ›spezifische Werte‹<sup>111</sup> an, die sprachlich meist als substantivische Hyponyme im Kontext von *Werte* realisiert werden (*Integrität*, *Leis-*

---

<sup>109</sup> Komposita sind Indizien für Faktizitätsherstellung, da das Wort (und damit die dahinterstehenden Sachverhalte) festgesetzt werden, bevor sie überhaupt argumentativ eingeführt werden (vgl. Felder 2012, 143).

<sup>110</sup> *Com\** könnte auch auf *Kommunikation*, *community* oder das lateinische Wort *com* („miteinander“) anspielen. Diese sind ebenfalls positiv besetzte Ausdrücke.

<sup>111</sup> Vgl. dazu die ausführliche Auflistung zu ›spezifische Werte‹ in Kapitel → 5.2.2.3. Vgl. dazu auch Masts (2008, 91) Unterscheidung psychosozialer und ökonomischer Unternehmenswerte. Erstere sind konstitutiv für das Organisationshandeln, während Letztere als dessen Ergebnis aufzufassen sind. Ökonomische Werte werden dahingehend auch in *materielle Werte* (Geld und Anlagen) sowie *immaterielle Werte* (Marken, Reputation oder *Image*) eingeteilt. Psychosoziale Werte sind einteilbar in Leistungswerte, Kommunikationswerte, Kooperationswerte und moralische Werte.

tung, Respekt etc.). Zugleich finden sich auch ›Wertehierarchien‹ durch Syntagmen wie *X als Leit-/Kernwert*. Betrachtet man die Syntagmen- und Satzebene, fällt auf, dass ›spezifische Werte‹ meist nicht durch Einzelbegriffe, sondern als Begriffspaare in substantivischer sequentieller Reihung mittels n-Grammen auftauchen:

Integrität, Begeisterung, Wertschätzung und Disziplin sind Werte, zu denen wir stehen – heute und in Zukunft. (Daimler Das Unternehmen 2011)

Beleuchtet man wiederum das Basislexem *Werte* in seiner syntagmatischen Repräsentation, werden wenige Adjektivattribute offenbar.<sup>112</sup> Auffallend sind dabei lediglich zwei Konstruktionsmuster, die eine spezifische ›Wertart‹ evozieren; es handelt sich um *gemeinsame Werte* (,gemeinsam‘) und die possessivische Konstruktion *unsere\* + Werte* (,besitzanzeigend‘):

Wir geben unser Bestes für Kunden, die das Beste erwarten, und wir leben eine Kultur der Spitzenleistung, die auf gemeinsamen Werten basiert. (Daimler Daimler hat das Automobil erfunden)

Unsere Werte liefern die Basis für unsere Motivation und unsere Entscheidungen. (VW Konzernleitlinien)

Bei METRO wird dabei auch von einer *gemeinsamen, identitätsstiftenden Wertordnung*<sup>113</sup> gesprochen, d.h. WERTE wird mit IDENTITÄT direkt auf der sprachlichen Oberfläche verknüpft. Die Besitzanzeige wird auch über Genitivattribute (*Werte der BASF*) sowie Präpositionalattribute (*Werte von Bayer*) ausgedrückt.

Auf der Satzebene taucht *Werte* häufig in Kookkurrenz mit bestimmten Verben (›Wertehandlung‹) auf: Es geht dabei um ,Werteunterstützung‘ (*helfen, unterstützen*) und ,Werteorientierung‘<sup>114</sup> (*orientieren, Orientierung sein*):

Die Werte helfen uns, Marken zu entwickeln, die unsere Kunden überzeugen, und ein Unternehmen zu schaffen, dem unsere Stakeholder vertrauen können. (Adidas Leitbild und Werte)

Vision und Grundwerte bilden gemeinsam den Rahmen für alle Entscheidungen und Handlungen. Sie sind somit Orientierung und Führungsinstrument zugleich und prägen unsere Unternehmenskultur. (BASF Vision.Grundwerte.Leitlinien)

Fortwährend im Kontext von *Werte* findet sich auch das Verb *prägen* (,Werteprägung‘) in Kookkurrenz mit *Handeln* oder *Verhalten*:

Unsere Werte: Was uns wichtig ist und unser Handeln im Sinne der Marke prägt. (Deutsche Bank Leitbild und Marke)

Sie [die Werte, S.B.] leiten uns im Umgang miteinander und prägen unser Verhalten gegenüber internen und externen Kunden. (Commerzbank Die Werte der Commerzbank)

WERTE werden folglich zur obersten Instanz für Unternehmen, wobei sich zu diesen *verpflichtet* (,Werteverpflichtung‘) wird (→ 9.2.5.5):

---

<sup>112</sup> Einzelfälle sind die Attribute *besondere, einzigartige, nachhaltige, persönliche, kulturelle* und *gelebte*.

<sup>113</sup> Vgl. dazu: „Als leistungsstarker Unternehmensverbund von erfolgreichen Vertriebslinien und Gesellschaften bekennen wir uns zu einer gemeinsamen, identitätsstiftenden Wertordnung und stehen in der Verpflichtung, an der Umsetzung unserer gemeinsamen Ziele mitzuwirken.“ (Metro Corporate Principles).

<sup>114</sup> ‚Werteorientierung‘ ist besonders in der Wissensdomäne RELIGION weit verbreitet, d.h. WERTE haben eine Entlastungsfunktion bei der Lebensgestaltung, da sie Orientierungsmaßstäbe vorgeben (vgl. Werner 2002, 5).

Damit unsere weltweite Zusammenarbeit erfolgreich funktioniert, haben wir uns gemeinsamen Werten verpflichtet, die für alle Mitarbeiter verbindlich sind. Ohne Ausnahme. Sie sind der Kompass, nach dem wir unser wirtschaftliches und soziales Handeln steuern – gegenüber Kunden und Geschäftspartnern sowie in der Zusammenarbeit miteinander. (Merck Einzigartig – Der Merck Weg)

MERCK ruft dabei im letzten Beleg, neben ‚Werteverpflichtung‘, auch das Konzept ›Werteverbindlichkeit‹ auf, was andere Unternehmen in sprachlichen Variationen aufgreifen:

Unsere Vision und Werte sind authentisch und nicht einfach ausgedacht. (Henkel GB 2010)

HENKEL nimmt demzufolge auf den vielfachen Vorwurf der ›Wertefiktionalität‹ Bezug und negiert diesen durch Dominantsetzung von ›Werteverbindlichkeit‹ (*authentisch und nicht einfach ausgedacht*). Das Konzept ›Wertefiktionalität‹ wird auch indirekt bei folgender ›Wertebehandlung‹ präsupponiert (›Wertebelebung‹)<sup>115</sup>:

Bei Linde ist jeder Einzelne bestrebt, unsere gemeinsame Vision zu erreichen und die Werte und Grundsätze, die wir uns gesetzt haben, Tag für Tag zu leben. (Linde Der Linde Spirit)

Das Top Management der Deutschen Telekom hat sich verpflichtet, diese Werte zu leben und sie in den Konzern zu integrieren. Das Ziel aller Mitarbeiter ist es, die Vision und Werte mit Leben zu füllen. (Telekom Die Unternehmenswerte der Deutschen Telekom)

Die Konstruktion *Werte leben* kann dabei durch ihr häufiges Auftreten als Kollokation gelten. Eine hohe Bindungsaffinität weist auch *Werte schaffen*<sup>116</sup> auf (›Wertebehandlung‹ ‚Wertschaffung‘). Beide Kollokationen, *Werte schaffen* und *Werte leben*, sind semantisch aufschlussreich, da durch *schaffen* bzw. *leben* eine Bedeutungsextension von *Werte* vorgenommen wird, im Sinne einer Materialisierung eines nicht-belebten Abstraktums. Zweitens bedeutet die Kollokation *Werte schaffen*<sup>117</sup> auch, dass WERTE erst in irgendeiner Weise erzeugt werden müssen, was bereits im Rahmen der Kollokationen (→ 7.1.4.2) thematisiert wurde. Diese Selbsterzeugung geschieht vom ›Werteinitiator‹, der in allen Fällen das ‚Unternehmen‘ ist (durch Eigennamen oder die metonymisch *wir*-Gruppe ausgedrückt):

Die Bayer AG definiert die gemeinsamen Werte, Ziele und Strategien des gesamten Konzerns. (Bayer Namen.Zahlen.Fakten 2010/2011)

Teilweise erfolgt jedoch eine diffuse sprachliche Repräsentation von ›Werteinitiator‹, wie der folgende Beleg von COMMERZBANK zeigt:

Sie [die Werte, S.B.] wurden auf Basis der Unternehmenshistorie und der Stakeholder-Anforderungen im Jahr 2007 von Vorstand und Führungskräften identifiziert und durch einen Arbeitskreis verifiziert, der aus Mitarbeitern aller Ebenen der Bank bestand. (Commerzbank Die Werte der Commerzbank)

›Werteinitiator‹ wird hierbei ausdrucksseitig vierfach besetzt (*Vorstand, Führungskräften, Arbeitskreis, Mitarbeitern*); indirekt werden auch *Unternehmenshistorie* und *Stakeholder-*

---

<sup>115</sup> Um ‚Wertebelebung‘ zu stützen, werden WERTE als ‚intrinsisch motiviert‘ gezeichnet: „[...] Werte kommen aus der Welt des Sports.“ (Adidas Leitbild und Werte).

<sup>116</sup> Die Verben *leben* und *schaffen* tauchen dabei auch in Kombination (koordinativ oder in konditionaler Verknüpfung) auf: „Wenn wir diese Werte leben, schaffen wir einen Orientierungsrahmen.“ (Daimler Verhaltensrichtlinien).

<sup>117</sup> Vgl. dazu auch die intertextuelle Aufnahme eines Zitates (→ 7.1.4.2).

Anforderungen im Jahr 2007 mitaufgenommen, sodass eine breite Adressatenabdeckung bei der COMMERZBANK erfolgt. ›Werteadressaten‹ dagegen werden in vielen Belegen explizit sprachlich durch die Präposition *für* evoziert und erscheinen als Benefaktiv der WERTE:

Dieser Bericht zeigt, wie wir Werte schaffen – für Mitarbeiter, Aktionäre, Geschäftspartner, Nachbarn und die Öffentlichkeit. (BASF GB 2010)

Werte schaffen für unsere Aktionäre, Kunden, Mitarbeiter und die Gesellschaft. (Bayer Leitbild)

Liest man diese Belege, scheint der Wertebegriff polysem (›Wertart‹ ‚immateriell/psychosozial‘ und ‚materiell/ökonomisch‘), da es gleichfalls um ERTRÄGE, UMSÄTZE, GEWINNE, die als Formen der *Wertschaffung* Grundprinzipien jedes ertragsorientierten Unternehmens sind, geht; gleichzeitig könnte es auch um die selbst zugeschriebenen ‚immateriellen/psychosozialen‘ WERTE gehen, die das Unternehmen qua Selbstdefinition besitzt. Es zeigen sich nur mäßig viele semantische Disambiguierungen durch den Kontext (→ Tab. 16):<sup>118</sup>

Tabelle 16 - Konzept ›Wertart‹

| ›Wertart‹ ‚immateriell/psychosozial‘                                                                            | ›Wertart‹ ‚materiell/ökonomisch‘                                                                                                                                                                              |
|-----------------------------------------------------------------------------------------------------------------|---------------------------------------------------------------------------------------------------------------------------------------------------------------------------------------------------------------|
| <u>Unternehmensverantwortung</u> ist fest in unseren <u>Werten</u> verankert. (Adidas Leitbild und Werte)       | Gleichzeitig wollen wir <u>Werte</u> schaffen durch <u>Innovation, Wachstum und eine hohe Ertragskraft</u> . (Bayer Leitbild)                                                                                 |
| Dieses <u>Vertrauen</u> entsteht, wenn wir gemeinsam bestimmte <u>Werte</u> leben. (Allianz Leitbild und Werte) | Als Rohstoffunternehmen ist unsere Strategie <u>nicht auf die Verfolgung kurzfristiger Renditeziele ausgerichtet, sondern auf nachhaltiges wirtschaftliches und Werte schaffendes Handeln</u> . (K+S GB 2010) |

Die Auswertung ergibt, dass eine Vielzahl der Belege die Polysemie des Ausdrucks *Werte* nutzt<sup>119</sup>, indem keine ausreichende semantische Disambiguierung für die Rezipienten stattfindet und die Janusköpfigkeit des Verbs *schaffen* (vgl. Duden 2001, 1357) zusätzlich zu Hilfe genommen wird. Dieses Ergebnis bedeutet praktisch: Unternehmen weiten die eigentliche Prädikation von *Wert/e* aus, indem beide Konzeptattribute (‚immateriell/psychosozial‘ und ‚materiell/ökonomisch‘) miteinander kombiniert werden. Im folgenden Beispiel wird durch die Erwähnung von personalen Entitäten im Kontext (*Mitarbeiter*) beispielsweise eine hybride bzw. vage Bedeutung angelegt:

Der größte Wert eines Unternehmens sind seine Mitarbeiter. (BDF Nachhaltigkeitsbericht 2010)

Die DEUTSCHE POST nimmt zwar im nächsten Beleg eine Disambiguierung im zweiten Satz zugunsten der ›Wertart‹ ‚materiell/ökonomisch‘ vor. Der erste Satz ruft jedoch, unterstützt

<sup>118</sup> Das Attribut ‚immateriell/psychosozial‘ wird häufig auch angezeigt durch das grammatisch markierte Pluraletantum *Werte*, durch die Komposita *Grundwerte*, *Leitwerte* oder die Kollokation *Werte leben*. Beim Attribut ‚materiell/ökonomisch‘ können Singular und Plural auftauchen. Komposita wie *Wertkette*, *Wertschöpfungskette* oder die Kollokation *Wert schöpfen* markieren diese Verwendung meistens.

<sup>119</sup> Um diese Polysemie im Diskurs reliabel zu belegen, empfiehlt sich im Weiteren der Vergleich mit dem lexikalischen (Kontext-)Profil von *Werte* in der (medialen) Berichterstattung zur Domäne WIRTSCHAFT, da hier das Konzeptattribut ‚materiell/ökonomisch‘ wahrscheinlich dominiert.

durch den Ausdruck *Verlässlichkeit*, das Konzeptattribut ‚immateriell/psychosozial‘ auf:

VERLÄSSLICHKEIT, DIE WERTE SCHAFFT. Deutsche Post DHL möchte ein attraktives Investment für Investoren sein und dafür auch bei der Profitabilität die führende Position in der Branche erreichen. (Deutsche Post GB 2010)

Eine explizite Bedeutungs- und damit auch Sachverhaltstrennung ergibt sich nur bei DAIMLER (*Wertegemeinschaften, Wertschöpfungsgemeinschaften*) und MERCK (*gelebten Werten, wirtschaftliche Werte*):

Eine integre Geschäftspraxis und nachhaltiges Wachstum sind eng verbunden, denn Wertegemeinschaften sind auf Dauer auch Wertschöpfungsgemeinschaften. (Daimler Das Unternehmen 2011)

Wir erstreben unternehmerischen Erfolg, der auf gelebten Werten basiert und wirtschaftliche Werte schafft. Genau das ist unser Unternehmenszweck: Gute Geschäfte zu machen indem wir unser Geschäft gut machen. Im doppelten Sinne eben. (Merck Einzigartig – Der Merck Weg)

MERCK spielt dabei auch metasprachlich auf die Polysemie von *Werte* an (*doppelten Sinne*) und präsupponiert damit zugleich, dass in einem ökonomischen Diskurs durchaus von einem Wertebegriff auszugehen ist, der aufgrund der grundsätzlichen Profitorientierung der Unternehmen (und deren ökonomischer Verantwortung) die Bedeutung ‚materiell/ökonomisch‘ miteinschließen muss.<sup>120</sup>

Des Weiteren zeigen sich auf der Satzebene auch Sachverhaltsverknüpfungen durch den Versuch der Kausalitätsherstellung (→ 8.4.1), um WERTE (hierbei ‚immateriell/psychosozial‘) in ihrem Einsatz zu legitimieren. Dies legt auch der Gebrauch der Kausaladverbialien *damit* oder *dadurch* (vgl. Köller 2004, 522) nahe, die Bedingungsverhältnisse zwischen dem Sachverhalt WERTE als URSACHE und einer spezifischen WIRKUNG ausdrücken:<sup>121</sup>

Unsere Werte und Verhaltensweisen, die Mitarbeiterinnen und Mitarbeiter in verschiedenen Ländern und Unternehmensteilen im Alltag leiten, erleichtern die Verständigung, verbessern den Wissensaustausch und die Zusammenarbeit über Bereichsgrenzen hinweg und wirken sich dadurch positiv auf den Erfolg des ganzen Konzerns aus. (E.ON Unsere Werte)

VERSTÄNDIGUNG und ERFOLG werden in diesem Beispiel als WIRKUNG aufgeführt, wobei ERFOLG (→ 9.2.9.1) im Korpus dominiert. Schließlich finden sich auf der Satzebene auch diverse Anschlüsse mittels Interrogativpronomen, die den Sachverhalt WERTE sprachlich paraphrasieren. Fragepronomen wie *wie* dienen dazu, die Aufmerksamkeit perspektivisch auf die konstituierten Größen zu wenden (vgl. Köller 2004, 481), was in diesem Fall die WERTE betrifft:

---

<sup>120</sup> Häufig wird auch auf die Bedeutung ‚immateriell/psychosozial‘ angespielt, um die als ‚unmoralisch‘ präsupponierte Haltung der Gewinnorientierung (‚materiell/ökonomisch‘) abzumildern: „Die K+S Gruppe hat sich der Initiative „Leitbild für verantwortliches Handeln in der Wirtschaft“ angeschlossen, die von mehreren Großunternehmen sowie weiteren familiengeführten und mittelständischen Unternehmen im November 2010 ins Leben gerufen wurde. Das Leitbild untermauert, dass sich Werte- und Erfolgsorientierung in der Wirtschaft nicht ausschließen, sondern zwei Seiten derselben Medaille sind.“ (K+S GB 2010).

<sup>121</sup> Vgl. dazu auch die Metareflexion „Im Übrigen besteht ein wissenschaftlich belegter Zusammenhang zwischen Werten und dem Erfolg eines Unternehmens.“ (Commerzbank Die Werte der Commerzbank).

Die Grundwerte der BASF beschreiben unsere Einstellung und die Art und Weise, wie wir unsere Ziele erreichen wollen. (BASF Vision.Grundwerte.Leitlinien)<sup>122</sup>

Teilweise wird *wie* auch metonymisch für *\*werte* eingesetzt:

Das Wie, das unser Handeln bestimmt. (Deutsche Post Werte und Kultur)

Auf der Textebene fallen zuletzt Isotopielinien durch Metaphernfelder auf, die mit der zugrunde liegenden Konzeptualisierung ›Werte als basal für das Unternehmenshandeln‹ sprachlich folgendermaßen realisiert werden: WERTE als GRUND, WERTE als BASIS, WERTE als FUNDAMENT und WERTE als ANKER:

Unternehmen, die erfolgreich sein und profitabel wachsen wollen, brauchen ein Fundament aus Werten, Kompetenz und Erfahrung. Dieses Fundament besteht aus der Geschichte des Unternehmens und der Menschen, die es prägen: Mitarbeitern, Aktionären und Kunden. (Siemens GB 2010)

Wir werden die damit verbundene Haltung, die man vielleicht am besten als sportliche Leistungskultur der stetigen Verbesserung beschreiben kann, als den wesentlichen Baustein in unseren Unternehmenswerten verankern. (Linde GB 2010)

Eine zweite Isotopielinie, in der sich mehr lexikalische Variation zeigt, ergeben die Metaphern *Richtschnur*, *Kompass* und *Rahmen*:

Unsere Werte sind die Richtschnur für unser Verhalten gegenüber der Gesellschaft, unseren Partner und untereinander. (BASF We create chemistry)

Diese metaphorischen Fügungen konzeptualisieren, dass WERTE „dem Verhalten des Einzelnen in seiner gemeinschaftlichen Eingebundenheit Stetigkeit und Verlässlichkeit ermöglichen [...]“ (Werner 2002, 2). Sie legen dadurch jedoch auch die ›Wertart‹ ‚statisch‘ nahe, was HENKEL explizit negiert:

Unsere Werte [...]. Diese sind nicht statisch, sondern werden weiterentwickelt und den sich laufend ändernden rechtlichen und wirtschaftlichen Bedingungen angepasst, denen Henkel als global tätiges Unternehmen unterliegt. (Henkel GB 2010)

Das Attribut ‚dynamisch‘ findet sich dagegen seltener.<sup>123</sup> Vw versucht, den Antagonismus zwischen ‚statisch‘ und ‚dynamisch‘ einzudämmen, indem *abstrakte[r] Werte* situational angepasst werden:

Unsere Konzernwerte sind ebenso wie die persönlichen Werte abstrakt. Der Vorteil abstrakter Werte ist ihre Übertragbarkeit auf die verschiedensten Situationen und Bereiche, wie es sie in einem so großen Unternehmen wie der Volkswagen AG gibt. Jeder Mitarbeiter setzt die Werte anders um. Die Richtung aber bleibt die Gleiche. Und das ist das Wichtige: Der gemeinsame Weg! (VW Konzernleitlinien)

BASF, BAYER, DEUTSCHE POST und LUFTHANSA konkretisieren ihre WERTE entsprechend, indem sie ‚konkrete‘ *Leitlinien* (→ 5.2.2.2) aus den WERTEN ableiten:

In diesem Entwicklungsprozess ist die Unternehmenskultur ein Schlüsselfaktor und die Leitlinien fungieren als Eckpfeiler, die diese Kultur formen. Daher wurden auch die Unternehmenswerte zu den aktuellen Leitlinien weiterentwickelt. Sie sind wichtige Instrumente, die vorgeben, wie wir uns verhalten wollen und sie repräsentieren unsere Werte und woran wir glauben. (Telekom Die Unternehmenswerte der Deutschen Telekom).

---

<sup>122</sup> Vgl. dazu auch: „Wie wir handeln (WERTE)“ (BASF Gemeinsam Zukunft gestalten).

<sup>123</sup> Vgl. dazu: „ComWerte gibt also eine Art Rahmen vor, der immer wieder neu interpretiert, konkretisiert und mit Leben erfüllt werden soll.“ (Commerzbank Die Werte der Commerzbank).



*Leitlinien* dienen somit nicht nur der Konkretisierung der WERTE, sondern auch als „Beweis“ der Umsetzung (vgl. Kläßen 1999, 24):

Die Leitlinien der BASF konkretisieren, wie wir im Unternehmensalltag handeln wollen. (BASF Vision. Grundwerte. Leitlinien)

BASF füttert ihre *Leitlinien* schließlich auch mit konkretem Beispielmateriale:

Wir unterlassen Handlungen, [...] die der Herstellung von illegalen Drogen oder chemischen Waffen dienen. (BASF Vision. Grundwerte. Leitlinien).

In wenigen Fällen entwickelt sich daneben ein eigenes Narrativ um die Entstehung bzw. Konkretisierung der WERTE. Das elaborierteste Beispiel dafür liefert die COMMERZBANK, indem *ComWerte* mittels 2.300 Workshops, Beiträgen in eigenen Fachzeitschriften („*Unternehmenswerte geben Halt*“ in *diebank* 7.2009), Plakatkampagnen, einem *ComWerte*-Film („*Wofür wir stehen*“) sowie einem *ComWerte*-InfoCafé ontisch gestützt werden.<sup>124</sup>

Schließlich fallen auf der Text-Bild-Ebene diverse Illustrationen von WERTE auf: Oftmals findet sich bei WERTE die ikonische Form der */Pyramide/* (→ 7.4.1.1). Im folgenden Beispiel von DAIMLER fungieren die WERTE (*Begeisterung, Wertschätzung, Integrität, Disziplin*) als */grüner Pyramidenboden/* und verweisen dabei wiederum auf die grundlegende Bedeutung von WERTE für die Unternehmensganzheit (>Werte als basal für das Unternehmenshandeln<):

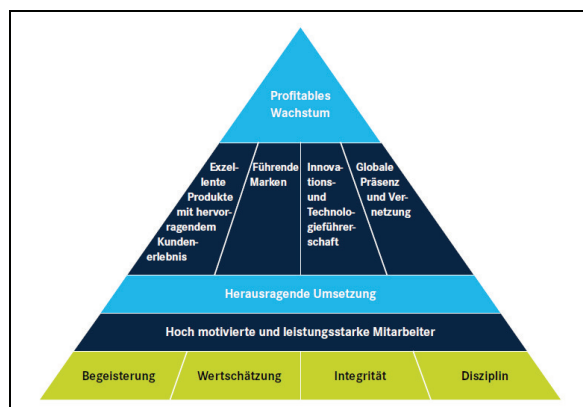

Abbildung 88 - Daimler Verhaltensrichtlinien

Akronyme – wenn man diese als bildliche Symbole begreift – verknüpfen ebenso einzelne WERTE, was TELEKOM im Folgenden durch *SPIRIT* zeigt:

Hinter T-Spirit verbirgt sich aber nicht nur der neue Geist, der im Konzern Einzug hält, sondern auch sechs ganz konkrete zentrale Unternehmenswerte, die sich systematisch aus den einzelnen Buchstaben S P I R I T ableiten lassen: [...]. (Telekom T-Spirit – Das Leitbild der Deutschen Telekom)

Dieses umfassende Kapitel veranschaulichte, dass der Diskurs um UNTERNEHMENSIDENTITÄT vor allem im Zeichen des Wertebegriffs ausgetragen wird (vgl. Werner 2002, 2f.). Es wird

<sup>124</sup> Hier stellt sich die Frage, inwieweit WERTE zum PRODUKT degradiert werden („produkthaft“). Vgl. dazu auch HENKELS Kampagne zum *Corporate Branding*: „[...] Dazu gehörten Handbücher mit detaillierten Vorgaben zum Corporate Design, eine Sonderausgabe der Mitarbeiterzeitung Henkel-Life, Broschüren, über die Vision und Werte, neue Visitenkarten, ein Image-Film und vieles mehr.“ (Henkel Corporate Identity).

kollektiv proklamiert, dass man WERTE als gemeinsame Grundlage braucht (>Werte als basal für das Unternehmenshandeln<; WERTE als GRUND/BASIS etc.), um verschiedenen Anspruchsgruppen (>Werteadressaten<) Orientierung zu geben. Bei dieser Wertepostulierung bleibt das Konzept >Wertart< ‚materiell/ökonomisch‘ bestehen, wird aber vielfach um ‚ideell/psychosozial‘ ergänzt<sup>125</sup>, da die WERTE in das gesamtgesellschaftliche Wertesystem integriert und mit diesem kongruent sein müssen, um als Unternehmen von der Gesellschaft Zustimmung zu erhalten (vgl. Kläßen 1999, 116). Es ließe sich jedoch unterstellen, dass polyseme Lesarten von *Werte* in vielen Beispielen erwünscht sind und ein strategisch-intentionaler Aspekt bei der vagen Bedeutungsvermittlung nicht zu verkennen ist. Sperling fasst solche Strategien trefflich unter den Terminus „strategische Ambiguität“ (Sperling 2007, 745). Strategische Ambiguität kommt dort zum Einsatz,

wo den Kommunikationspartnern an der Aufrechterhaltung guter Beziehungen gelegen ist. Aussagen werden dann bewusst mehrdeutig formuliert, um divergierende Ansichten unter einem relativ unscharfen Oberbegriff zu vereinen und diese nicht zu deutlich werden zu lassen. (Sperling 2007, 745)<sup>126</sup>

Das bedeutet, alle Anspruchsgruppen können unter den unscharfen Oberbegriff >Werte< ihre eigenen Bedeutungen subsumieren und werden nicht genötigt, spezifizierte Bedeutungen anzunehmen. Es entsteht scheinbar ein kollektiver Konsens durch den „Raum vielfältiger Deutungen“ (Sperling 2007, 749). Dem Unternehmen bleiben damit auch diverse Handlungsoptionen offen. Solche ambigen Aussagen führen jedoch konsequenterweise zur Frage nach der Authentizität der WERTE von Unternehmen (und daran anknüpfend von UNTERNEHMENS-IDENTITÄT).

### 1.2.5.2 KULTUR

*Werte* präsentiert sich zahlreich in Kookkurrenz mit *Kultur*, was auch Textbezeichnungen widerspiegeln (DEUTSCHE POST *Werte und Kultur* oder ALLIANZ *Kultur und Werte*). *Kultur* (\*kultur\* besitzt 509 Hits in den Konkordanzen) hat eine positive deontische Bedeutung, denn KULTUR ist (wie WERTE) etwas, das es zu bewahren und zu schützen gilt (vgl. Gardt 2012, 67). Häufig taucht auch das Kompositum *Unternehmenskultur* auf:

Mit ComWerte wollen wir die Unternehmenskultur nicht nur beschreiben, sondern alle Mitarbeiter anregen, sich regelmäßig mit der Unternehmenskultur der Bank auseinanderzusetzen. (Commerzbank Die Werte der Commerzbank)

Der Ausdruck *Unternehmenskultur* evoziert das ‚Unternehmen‘ als >Kulturträger<<sup>127</sup>, dem als

---

<sup>125</sup> Diese Doppelfunktion hat zur Folge, dass auf kognitiver Ebene das Konzept >Werte< mit zwei verschiedenen Konzeptbereichen verknüpft wird (vgl. Jacob 2011, 75f.).

<sup>126</sup> Ambiguität kommt danach eine Integrationsfunktion zu, denn Mehrdeutigkeit, die objektiv vorliegt, wird subjektiv vom Rezipienten nicht erfahren (vgl. Dieckmann 1975, 68). Zudem können vage Aussagen einfacher semantisch neu ausgerichtet oder, in brisanten Kommunikationssituationen, korrigiert werden. Sproule (1980, 248) weist aus der Perspektive der Glaubwürdigkeitsforschung jedoch darauf hin, dass eine ambige Ausdrucksweise (sowohl in Lexik als Syntax) nicht dazu dient, das Vertrauen in den Sender zu stärken.

Sozialgebilde Kultur zugeschrieben werden kann (→ 2.2.3). Allerdings zeigen weitere Komposita mit *\*kultur*, dass es vielfach nicht um *Unternehmenskultur* als ›Universalkultur‹ im UNTERNEHMEN geht, sondern um eine Verengung des Kulturbegriffs hin zu einer bestimmten ›Kulturart‹. Besonders zahlreich wird dabei von *Leistungskultur* gesprochen (‚Leistung‘):<sup>128</sup>

Die Leadership Values wurden eingeführt, um die Qualität des Führungsverhaltens zu verbessern und die Entwicklung einer Leistungskultur in der Allianz Gruppe zu beschleunigen. (Allianz Kultur und Werte)

HENKEL steigert seinen Absolutheitsanspruch an die konstituierte LEISTUNGSKULTUR nochmals durch die Eigenbezeichnung *Winning Culture* und den gleichzeitigen Sachverhaltsfestsetzungsversuch von WINNING CULTURE in Text-Bild-Kombination:

Nur indem wir unsere Mitarbeiter schätzen, fordern und fördern, etablieren wir bei Henkel eine „Winning Culture“. (Henkel Vision und Werte)

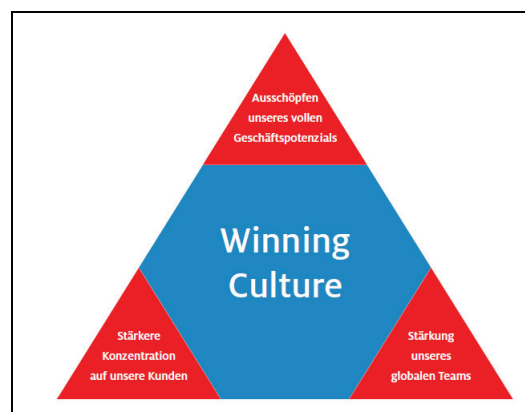

Abbildung 89 - Henkel GB 2010

Die einzelnen TEILE dieser WINNING CULTURE werden dabei in den *Idrei roten Dreiecksspitzen*/ aufgelistet. Diverse Belege von HENKEL stützen darüber diesen Sachverhaltsfestsetzungsversuch (*Winning Culture ist x*):

Eine Winning Culture ist geprägt von unternehmerischem Denken und Handeln sowie von der fortwährenden Bereitschaft zu Veränderungen. (Henkel Vision und Werte)

Weitere Abstrakta, die mit *\*kultur* versehen werden und dadurch das Konzept ›Kulturart‹ evozieren, sind *Integritätskultur* (‚Integrität‘) und *Wertekultur* (‚Werte‘). Diese Ausdrücke werden außerdem häufig mit *gelebt\** attribuiert:

Ein Viertel des betriebswirtschaftlichen Erfolgs wird der Wirkung einer gelebten Wertekultur zugeschrieben. (Commerzbank Die Werte der Commerzbank)

Die Komposita *Qualitätskultur*<sup>129</sup>, *Servicekultur*<sup>130</sup>, *Innovationskultur* und *Aktienkultur* dage-

<sup>127</sup> Vgl. dazu: *Kultur* impliziert einen sozialen Aspekt als Gesamtheit der geistigen, künstlerischen, gestaltenden Leistungen einer Gemeinschaft (vgl. Duden 2001, 972).

<sup>128</sup> Vgl. dazu auch: „Exzellente sein bedeutet zudem, dass wir als Unternehmen für die besten Köpfe, die der Markt bietet, attraktiv sind. Es bedeutet, ihnen die Qualifikationen zu vermitteln und Chancen zu geben, die erforderlich sind, um Höchstleistungen zu erbringen. Denn wir wollen eine leistungsfähige Unternehmenskultur fördern.“ (Siemens Unsere Werte).

<sup>129</sup> Vgl. dazu: „Wir glauben, dass Siemens für eine Qualitätskultur steht, die den Kunden und seine Anforderungen in den Mittelpunkt stellt.“ (Siemens GB 2010).

gen leiten durch ihren Kontext eine eher objekthafte Konzeptualisierung ein:

Mit der klaren Absicht, eine Aktienkultur im Unternehmen zu fördern, haben wir zudem verschiedene Aktien-Beteiligungsprogramme für das obere Management und andere Mitarbeiter eingeführt. (Siemens GB 2010)

Ebenfalls das Syntagma *Kultur der X* dient dazu, das Konzept ›Kulturart‹ aufzurufen (*X* ist oftmals *Leistung*, *Compliance* oder *Verantwortung*):

Eine nachhaltige Kultur der Compliance können wir nur etablieren, wenn jeder Einzelne die Regeln verinnerlicht und Verantwortung übernimmt. (Daimler Das Unternehmen 2011)<sup>131</sup>

Um die Individualität sowie Unternehmenszugehörigkeit ihrer KULTUR syntagmatisch auszudrücken, nutzen Unternehmen (wie bei WERTE) possessivische Konstruktionen mittels Eigennamen (*Merck-Kultur*, *Heidelberger Unternehmenskultur*):

Sich selber treu bleiben: Die Merck-Kultur. Für Merck beginnt unternehmerischer Erfolg beim Menschen. (Merck Einzigartig – Der Merck Weg)

Die Heidelberger Unternehmenskultur. (HeidelbergCement Corporate Mission)

LINDE gebraucht dazu auch den Neologismus *Linde Spirit*<sup>132</sup>; E.ON spricht von *OneE.ON*:

Zur Ausrichtung des Konzerns auf eine gemeinsame Kultur und damit zur Integration aller Konzernunternehmen unter dem Dach von E.ON wurde ein Prozess mit dem Namen OneE.ON gestartet. (E.ON Unsere Werte)

In diesem Beleg von E.ON erscheint auch das Konzept ›Kultur als Prozess‹<sup>133</sup>, was durch Komposita wie *Kulturwandel* im Korpus wiederholt aufgenommen wird:

Der Kulturwandel, den die Leadership Values zum Ziel haben, soll eine offene Kommunikation und vertrauensvolle Atmosphäre im Umgang mit Mitarbeitern und Kunden schaffen. (Allianz Kultur und Werte)

Auch der folgende Beleg ruft das Konzept ›Kultur als Prozess‹ auf und fügt das Element der ‚Steuerung‘ (*Veränderung*) hinzu:

Mit Shape 2012 verbinden wir nicht nur ein eindeutiges finanzielles Ziel, sondern streben vor allem eine Veränderung in unserer Unternehmenskultur an: Denn damit wir uns auch künftig konsequent an den Bedürfnissen unserer Kunden ausrichten und effizienter agieren können, müssen wir den Unternehmertegeist unserer Mitarbeiter und unsere Innovationskraft stärken. (Metro GB 2010)

Des Weiteren offenbaren sich auf syntagmatischer Ebene linksseitige Anschlüsse von *\*kultur* durch das bereits bekannte Muster *unsere\** + *\*kultur* (›Kulturart‹ ‚besitzanzeigend‘). Ein weiteres charakteristisches Konzeptattribut, das auf der Syntagmenebene evoziert wird, stellt ‚verbindend‘ dar:

Gemeinsame Werte schaffen eine verbindliche und verbindende Unternehmenskultur, und damit Orientierung für unsere tägliche Arbeit. (Commerzbank Die Werte der Commerzbank)

Drittens findet sich das Merkmal ‚individuell‘<sup>134</sup>:

---

<sup>130</sup> Vgl. dazu: „One Company für eine gemeinsame Servicekultur.“ (Telekom GB 2010).

<sup>131</sup> Vgl. dazu: „Die Allianz fördert eine interne Unternehmenskultur der Verantwortung der einzelnen Mitarbeiter und der kontinuierlichen Weiterentwicklung auf Basis der Umsetzung „besten Praxis“ und der Antizipation neuer gesellschaftlicher und gesetzlicher Anforderungen.“ (Allianz Grundsätze nachhaltiger Entwicklung).

<sup>132</sup> Vgl. dazu: „Der Linde Spirit. Unsere Unternehmenskultur verbindet uns.“ (Linde Der Linde Spirit).

<sup>133</sup> Vgl. dazu Hall (1994) mit seinem dynamischen Kulturkonzept.

Als Kernkompetenzen sehen wir unsere Fähigkeit zur Innovation, unser traditionell hohes Qualitätsbewusstsein, unsere einzigartige Unternehmenskultur und unser partnerschaftliches Denken, das den Blick schärft für die Bedürfnisse von Kunden, Verbrauchern und Patienten. (Merck Einzigartig – Der Merck Weg)

Im Mittelpunkt steht eine starke und unverwechselbare Unternehmenskultur: [...]. (Henkel GB 2010)

Durch diese Attribuierungen zeigt sich KULTUR als besondere Ordnungsvorstellung, die sich durch interne Gemeinsamkeiten im UNTERNEHMEN bildet, das sich von anderen abgrenzt.<sup>135</sup>

Auf der Satzebene taucht *\*kultur* mit den Verben *entwickeln* und *gestalten* im Kontext regelmäßig auf, die das Konzept ›Kulturhandlung‹ transportieren (,Kulturentwicklung‘, ,Kulturgestaltung‘):

So gestalten wir aktiv unsere Unternehmenskultur und können uns selbst noch besser an den eigenen Grundsätzen messen. (Merck Stabile Einheit: Leitbild, Werte, Strategie)

Diese Konzeptualisierungen erwecken den Eindruck, dass KULTUR – neben ›Kultur als Prozess‹ – auch als ›Kulturprodukt‹ gesehen wird, das ,entwickelt‘ bzw. ,gestaltet‘ werden kann.

Auch die perfektive Form *ist entstanden* legt dies nahe:

Es ist eine Kultur entstanden, in der jeder Einzelne etwas bewegen kann. (Merck Einzigartig – Der Merck Weg)

Analog dazu wird durch die Verbmetaphern *fördern* das Konzeptattribut ,Kulturaufrechterhaltung‘ ausgedrückt, d.h. dass die Inhalte und Bedeutungen von KULTUR ,erhalten‘ und reproduziert werden.<sup>136</sup>

Infineon fördert eine von Vielfalt, Offenheit und Verständigung geprägte Kultur innerhalb eines global agierenden Unternehmens. (Infineon Unser Infineon Team)

Wir fördern eine Unternehmenskultur, die Vielfalt ermöglicht und wertschätzt. (ThyssenKrupp GB 2010)

Durch die Verbindung mit dem Verb *leben* wird schließlich eine ,Kulturbelebung‘ vorgenommen, was sich bereits bei WERTE vorfindet.<sup>137</sup>

Unser Ziel ist es, eine Kultur fortwährender Verbesserung und Transparenz auf höchstem Niveau zu leben. (Siemens GB 2010)

Auf der Satzebene finden sich in Verbindung mit *\*kultur* auch ›Kulturträger‹ im Kontext der Verben *prägen* und *beitragen*. Diese sind v.a. ,Mitarbeiter‘:

Erfolg hat viele Gesichter. Bei uns sind es weltweit über 20.000. Mit ihren Leistungen und ihrem Engagement treiben sie die Entwicklung von Beiersdorf voran und prägen die besondere Unternehmenskultur. (BDF Unser Profil)

---

<sup>134</sup> Diese Syntagmen erinnern an ähnliche Kollokationsmuster bei *\*identität*, wodurch die partielle Synonymität in der Verwendung der Unternehmen – bei *\*kultur* – erkennbar wird.

<sup>135</sup> Weniger häufige Attribuierungen sind: *gelebte Unternehmenskultur*, *nachhaltige (Unternehmens-)Kultur*, *internationale Unternehmenskultur* und *leistungsfähige Unternehmenskultur*. Vgl. dazu auch: „Wir bieten ihnen gute Arbeitsbedingungen, angemessene Weiterentwicklungsmöglichkeiten und eine fördernde und internationale Unternehmenskultur.“ (Lufthansa Leitlinien).

<sup>136</sup> Vgl. dazu Jernej (2008, 180): „Kultur hat somit auch etwas mit Wiederholung zu tun.“ In vielen Fällen ist dies allerdings nur voluntativ assertiert: „Als Erfinder des Automobils wollen wir eine Unternehmenskultur fördern, die nicht nur die gesetzlichen Anforderungen erfüllt, sondern auch höchsten ethischen Ansprüchen genügt.“ (Daimler Das Unternehmen 2011).

<sup>137</sup> Dazu gehört auch die Derivation mittels des Adjektivs *lebendig*\*: „Lebendig wird die Kultur eines Unternehmens erst durch die Menschen, die sie mit Leben erfüllen.“ (Merck Einzigartig – Der Merck Weg).

Weitere ›Kulturträger‹ zeigen sich auch im Kontext des Syntagmas *\*teil\* unserer/der Unternehmenskultur*: Diese ›Kulturträger‹ sind u.a. ‚rechtliche Korrektheit/Integrität‘ und ‚gesellschaftliche Verantwortung‘, die man durch ihre lexikalische Repräsentation (*\*teil\**) auch als ›Kulturteile‹ verstehen könnte:

Verantwortungsvolles und rechtmäßiges Handeln ist eine der Grundvoraussetzungen für den unternehmerischen Erfolg der BMW Group. Dieses ist fester Bestandteil unserer Unternehmenskultur. (BMW GB 2010)

Die Konzepte ›Kulturteile‹ bzw. ›Kulturträger‹ setzen sich isotopisch auf der Satz- und Textebene fort und konstituieren dadurch KULTURTEILE. Eine weitere Isotopie wird durch die bereits beschriebene GRUND/BASIS/FUNDAMENT-Metaphorik hergestellt:

Unser Ziel ist es, eine Unternehmenskultur zu fördern, die auf unternehmerischer Mitverantwortung basiert [...]. (Telekom GB 2010)

Im Gegensatz zu WERTE wird KULTUR dabei jedoch nicht als BASIS gesehen, sondern als ein auf die BASIS aufbauendes Phänomen. Dieser Eindruck geht einher mit Belegen, in denen KULTUR als FAKTOR oder SCHLÜSSEL konstituiert wird:

Der Schlüssel zu Spitzenleistungen, zu profitabilem Wachstum und Erfolg liegt nicht zuletzt in unserer Unternehmenskultur. (Daimler Verhaltensrichtlinien)

Das Konzept, welches damit aufgerufen wird, lautet ›Kultur ist Voraussetzung für ein höheres Ziel<sup>138</sup>. Das höhere ZIEL ist dabei meist ein ökonomischer Zielzustand wie WACHSTUM oder ERFOLG (→ 9.2.9).

Zuletzt soll auf der Textebene auf die Makropropositionen eingegangen werden, in welchen auf KULTUR referiert wird. Mehrfach finden sich in Überschriften Verweise durch das Substantiv *\*kultur* (oft in Verbindung mit *Werte*, s.o.). Diese Fügungen enthalten zeichenhafte Verstärker (Doppelpunkte oder Fettsetzungen), welche die Sachverhaltsfestsetzung von KULTUR unterstützen:

**Unternehmenskultur**: Noch ein Wort zur Unternehmenskultur von Beiersdorf. Für uns ist es selbstverständlich, Menschenrechte und gesellschaftliche Werte zu achten; partnerschaftlich mit allen gesellschaftlichen Gruppen unseres Umfeldes zusammenzuarbeiten; die Persönlichkeit des Einzelnen zu respektieren. Diese Prinzipien sind für uns die Richtschnur des täglichen Handelns – jetzt und in Zukunft. (BDF Imagebroschüre)

MERCK (*Der Merck Weg*) reflektiert ausführlich textuell die *Merck-Kultur*:

Sich selber treu bleiben: Die Merck-Kultur. [...] Lebendig wird die Kultur eines Unternehmens erst durch die Menschen, die sie mit Leben erfüllen. [...] Diese Kombination aus persönlicher Entfaltungsfreiheit und Team-Zugehörigkeit ist wie die DNA unseres Unternehmens – im Inneren verborgen und eigentlich nur für diejenigen zu verstehen, die dazugehören. Diese Kultur ist sowohl Grundlage für unseren nachhaltigen wirtschaftlichen Erfolg als auch Treiber für notwendige Veränderungen. (Merck Einzigartig – Der Merck Weg)

---

<sup>138</sup> Vgl. dazu auch: „Unternehmenskultur ist eine wichtige Voraussetzung für den Erfolg von Bayer.“ (Bayer Leitbild).



Gerade in diesem Text wird die starke Verbindung von KULTUR zu IDENTITÄT deutlich, etwa durch die Ausdrücke bzw. Ausdruckskomplexe *selber, unterscheiden, DNA unseres Unternehmens und im Inneren*.

Dieses Kapitel konnte damit aufdecken, dass Unternehmen KULTUR als spezifische interne Lebenswelt konstituieren. Diese KULTUR kann durch das symbolische Handeln der Mitarbeiter ‚gestaltet‘ und damit ‚etabliert‘ werden. KULTUR kann somit ein Zeichencharakter (*Signal*) unterstellt werden (vgl. Bolten 2001, 21):

Zugleich sendet eine gelebte Unternehmenskultur ein starkes Signal nach außen. (Commerzbank Die Werte der Commerzbank)

Gleichzeitig trägt KULTUR aber auch zur Verbindung der Mitglieder (*Menschen, die sie mit Leben erfüllen*) und dadurch zur Identitätskonstruktion (*DNA unseres Unternehmens*) bei, was unter dem Attribut ‚verbindend‘ schon angeführt wurde.<sup>139</sup> KULTUR ist damit ein vereinender Beschreibungskontext spezifischer Handlungen in der internen sozialen Welt des Unternehmens.

### 1.2.5.3 NACHHALTIGKEIT

Der Sachverhalt NACHHALTIGKEIT (\**nachhaltig*\* besitzt 1.739 *Hits* in den Konkordanzen; *Nachhaltigkeit* ist *Keyword* und Hochfrequenzwort) zeigt sich bereits auf der Sprachoberfläche durch die direkte Verknüpfung von *nachhaltig*\* und *Selbstverständnis* als zentrales Element von UNTERNEHMENSIDENTITÄT (>Nachhaltigkeit ist Teil der Unternehmensidentität<):

Bei Siemens steht Nachhaltigkeit im Zentrum dieses Selbstverständnisses. Nachhaltigkeit im Geist der Gründerfamilie, Nachhaltigkeit im Dienst von Kunden, Aktionären und der Gesellschaft. (Siemens GB 2010)

Der metasprachliche Verweis auf das *Thema Nachhaltigkeit* dient im folgenden Beleg der Festsetzung des Sachverhalts NACHHALTIGKEIT, da dieser als bekannt und referierbar konstituiert wird:<sup>140</sup>

Wir verfolgen das Thema Nachhaltigkeit langfristig und unternehmerisch – in all unseren Aktivitäten entlang der Wertschöpfungskette. (Henkel GB 2010)

Zudem werden *Nachhaltigkeitsthemen* identifiziert:

Im Rahmen einer Wesentlichkeitsanalyse haben wir für unser Chemie- und Pharmageschäft wichtige Nachhaltigkeitsthemen identifiziert. (Merck GB 2010)

Darüber sind Sachverhaltsfestsetzungen von NACHHALTIGKEIT durch die Textsorte *Nachhal-*

---

<sup>139</sup> (Deontisch) zugespitzt findet sich das Attribut ‚verbindend‘ auch in folgenden Textteilen: „Vielmehr müssen auch die Mitarbeiter beider Häuser kulturell zusammenwachsen. Verhaltensweisen gleichen sich an, Spielregeln werden gelernt oder entwickeln sich neu. Das dauert erfahrungsgemäß fünf bis sieben Jahre, in manchen Fällen auch länger. Dessen ist sich die Bank bewusst und fördert deshalb die kulturelle Integration gezielt, beispielsweise durch Workshops für Führungskräfte und Mitarbeiter. Die Basis dafür: ComWerte.“ (Commerzbank Die Werte der Commerzbank).

<sup>140</sup> Vgl. dazu auch die Varianten zu \**thema* durch *in Sachen, in puncto, Bereich* und *Feld*: „Standards setzt das neue Fisch-Logistikzentrum auch in Sachen Nachhaltigkeit.“ (Metro GB 2010).

tigkeitsbericht<sup>141</sup> erkennbar, die sich inzwischen in den Unternehmen etabliert hat:

Ausführliche Informationen und Hintergründe zum Thema Nachhaltigkeit kommunizieren wir in unserem Nachhaltigkeitsbericht. Damit dokumentieren wir, welch hohen Stellenwert die Nachhaltigkeit in unserem Unternehmen einnimmt. (Henkel GB 2010)

Auch die hohe Wortbildungsproduktivität von *Nachhaltigkeit\** verweist auf den enormen Stellenwert des Sachverhalts für UNTERNEHMENSIDENTITÄT. Substantivische Komposita mit *\*nachhaltigkeit\** rufen dabei verschiedene Bedeutungsdimensionen auf: Häufig wird im Diskurs der Versuch unternommen, den Nachhaltigkeitsbegriff<sup>142</sup> zu entabstrahieren und an Konkreta zu binden, die als zweite Konstituente in Komposita mit *Nachhaltigkeit\** erscheinen und ›Nachhaltigkeitsträger‹ aufrufen: Neben ›Produkte‹ (*Nachhaltigkeitslösungen*) als ›Nachhaltigkeitsträger‹ sind ›Messinstrumentarien‹ im Diskurs geläufig (›Messbarmachung der Nachhaltigkeit‹), die durch Ausdrücke wie *Nachhaltigkeitskriterien*, *Nachhaltigkeitskennzahlen* und *Nachhaltigkeitsindikatoren*<sup>143</sup> visibel werden. Dadurch wird NACHHALTIGKEIT ›kalkulierbar‹. Diese Konzeptualisierung zeigen auch die Komposita *Nachhaltigkeitsprofil*, *Nachhaltigkeitsmanagement* und *Nachhaltigkeitsstrategie* an:

Die Bank Sarasin hat das Nachhaltigkeitsprofil von Henkel aktualisiert und das Unternehmensrating in der besten Kategorie („Hoch“) bestätigt. (Henkel GB 2010)<sup>144</sup>

NACHHALTIGKEIT wird durch Komposita solcher Art in ökonomische Gesetze der Leistung eingepasst, was die Ausdrücke *Nachhaltigkeitsperformance*, *Nachhaltigkeitsleistung* sowie *Nachhaltigkeitsziele* bestätigen:

Streben nach Transparenz unserer Nachhaltigkeitsperformance. (Allianz GB 2010)

In unserem eigenen Geschäft tun wir vereinfacht gesagt das, was uns wirtschaftlich nützt und was unsere Nachhaltigkeitsziele stützt. (Metro GB 2010)

Im letzten Beleg werden die *Nachhaltigkeitsziele* direkt mit dem ökonomischen Nutzenprinzip verknüpft (*was uns wirtschaftlich nützt*). In logischer Folge findet sich somit auch der kompetitive Umgang mit NACHHALTIGKEIT im Korpus, indem Bezugnahmen durch Ausdrücke wie *Nachhaltigkeitsindex*, *-ratings* oder *-preise* (→ 8.2.3.5.4) auftauchen, die Unternehmen im Umgang mit NACHHALTIGKEIT auszeichnen:

---

<sup>141</sup> Vgl. dazu auch: „Nachhaltigkeit ist ein fester Bestandteil unserer Strategie. Daher verbindet dieser Bericht die Finanz- und Nachhaltigkeitsberichterstattung in einer Publikation.“ (BASF GB 2010) Vgl. dazu Schwegler i.V.

<sup>142</sup> Vgl. dazu auch: „Der Begriff der Nachhaltigkeit ist eng mit unserer Geschäftstätigkeit verknüpft. Wir sind uns der Verantwortung bewusst, die mit der Nutzung von natürlichen Ressourcen verbunden ist: Nur wenn wir sorgsam und effizient mit unseren Ressourcen umgehen, den Stand der Technik berücksichtigen, die unvermeidbaren Eingriffe in die Natur so gering wie möglich halten, unsere Mitarbeiter nach bestem Wissen fördern und jungen Menschen eine fundierte Ausbildung geben, sind wir zukunftsfähig.“ (K+S GB 2010).

<sup>143</sup> Vgl. dazu auch: „Nachhaltigkeitsindikatoren spiegeln verantwortliches Handeln wider. Wie bereits dargestellt, haben wir uns für jedes CR-Handlungsfeld konkrete Ziele gesteckt.“ (RWE GB 2010).

<sup>144</sup> Vgl. dazu: „Mit der Einrichtung des Corporate Sustainability Board auf Vorstandsebene hat Daimler 2008 das Nachhaltigkeitsmanagement weiter gestärkt und Prozesse erfolgreich gebündelt.“ (Daimler Unternehmensinformationen 2010); „Als Rohstoffunternehmen stehen für uns Mensch, Natur und Gesellschaft im Zentrum unserer Nachhaltigkeitsstrategie. Wir erachten Umweltvorsorge, Klimaschutz und nachhaltige Ressourcensicherung als Fundament für unsere künftige Entwicklung.“ (HeidelbergCement GB 2010).

Als eines der ersten Unternehmen Deutschlands haben wir einen Teil der variablen Vorstandsvergütung mit der Erreichung eines Nachhaltigkeitsindex verknüpft. (RWE Unsere Verantwortung 2010)

Der Ausdruck *Nachhaltigkeitsindex* wird meist mittels Eigennamen spezifiziert, was ebenfalls bereits unter der Bezugnahme auf INDIZES dargestellt wurde:

So sind wir im Dow Jones Sustainability World Index und im europäischen Dow Jones Sustainability Europe Index erneut „Nachhaltigkeits-Führer“ und als einziges Unternehmen des Marktsektors „Nondurable Household Products“ vertreten. (Henkel GB 2010).

HENKEL inszeniert sich in diesem Beleg sprachlich als *Nachhaltigkeits-Führer*. Auffallend ist ferner, dass die Aufnahme in den INDEX als ‚schwer‘ und als ‚Belohnung für harte Arbeit‘ konzeptualisiert wird.<sup>145</sup>

Erfreuliches Ergebnis unserer Bemühungen ist die Aufnahme in den „Dow Jones Sustainability Index Europe“ im September 2010. Wir nahmen dieses Jahr zum ersten Mal an der Befragung teil und schafften auf Anhieb die Aufnahme in den Kreis der zehn nachhaltigsten Halbleiterfirmen der Welt. (Infineon GB 2010)

Unser Engagement für Nachhaltigkeit wurde auch 2010 belohnt. So haben wir uns erneut für einen der weltweit wichtigsten Indizes für nachhaltige Unternehmen, den Dow Jones Sustainability Index (DJSI), qualifiziert. (E.ON Cleaner and better energy)

Die häufigen Bezugnahmen auf INDIZES, RATINGS und PREISE in Bezug auf NACHHALTIGKEIT (>kompetitive Nachhaltigkeitsmesseinheiten<) dienen darüber hinaus auch der Objektivierung von Aussagen. Denn damit wird eine externe Autoritätsinstanz unterstellt, die das Unternehmen (nachprüfbar) einschätzt, bewertet (*ratet*) und schließlich als index- oder preiswürdig anerkennt. Diese AUTORITÄTEN werden auch präsupponiert, wenn auf Instanzen der >Nachhaltigkeitsregulation- und kontrolle< hingewiesen wird (z.B. *Nachhaltigkeitsrat*):

Bereits 2009 haben wir einen Nachhaltigkeitsrat eingerichtet. (Metro GB 2010)

Meist referieren englische Ausdrücke (*Sustainability Council*, *Sustainability Board*) darauf:

Der Sustainability Council von Henkel steuert die globalen Aktivitäten in Zusammenarbeit mit den einzelnen Unternehmensbereichen. (Henkel GB 2010)

Bei ThyssenKrupp verstehen wir Nachhaltigkeit als eine wesentliche Führungsaufgabe. Im Geschäftsjahr 2010/2011 wird der Bedeutung von Nachhaltigkeit auch organisatorisch durch die Schaffung eines eigenständigen Vorstandsressorts Corporate Sustainability Rechnung getragen. (ThyssenKrupp GB 2010)

Schließlich gehört zur >Nachhaltigkeitsregulation- und kontrolle< auch die schriftliche Fixierung in Texten, die in den Attributen ‚Nachhaltigkeitsstrategie‘, ‚Nachhaltigkeitsprogramm‘ sowie ‚Nachhaltigkeitsbericht‘ (s.o.) erscheint:

Das zentrale Instrument unseres Nachhaltigkeitsmanagements ist das Nachhaltigkeitsprogramm 2020. Es beschreibt unsere Verpflichtung sowie Ziele und Maßnahmen zu sechs Schwerpunktthemen, die ein nachhaltiges Unternehmenswachstum sichern sollen. (HeidelbergCement GB 2010)

Weitere intertextuelle Bezugnahmen geschehen durch die Ausdrücke *Nachhaltigkeitsleitbild*<sup>146</sup>, *Nachhaltigkeitsstrategie*<sup>147</sup>, *Nachhaltigkeitsrichtlinie*<sup>148</sup> und *Code of Corporate Sus-*

---

<sup>145</sup> Dies wird auch präsupponiert, wenn die Aufnahme nicht gelingt (*Gatekeeping* → 8.4.2.3).

<sup>146</sup> Vgl. dazu: „Die Integration des Nachhaltigkeitsleitbildes des Konzerns in die Lieferantenbeziehungen ist eine wichtige Aufgabe auf allen Ebenen des Bereichs Beschaffung: Wir übertragen dabei die Umwelt- und Sozialstandards im Sinne der Unternehmenspolitik auf das Lieferantenmanagement.“ (VW GB 2010).

*tainability*. So ließe sich insgesamt (wie bei SICHERHEIT) von einer Institutionalisierung von NACHHALTIGKEIT sprechen (>Nachhaltigkeit ist in Unternehmen institutionalisiert<). SIEMENS greift dieses zugrunde liegende Konzept metareflektierend auf und spricht von *Nachhaltigkeit als leitende[m] Prinzip*:

Damals wie heute gehört hierzu ein starkes Fundament, eine Basis, auf der wir aufbauen können. Unsere Werte, Nachhaltigkeit als leitendes Prinzip und unser Anspruch, überall auf der Welt führende Markt- und Technologiepositionen einzunehmen, zeichnen es aus. (Siemens Unsere Werte)<sup>147</sup>

Betrachtet man im weiteren Vorgehen die Syntagmen, finden sich wenige adjektivische Attributionen der Form *x Nachhaltigkeit*. Teilweise tauchen die Adjektive *ökologisch\** oder *sozial\** auf, mit denen das Konzept >Nachhaltigkeitsart< aufgerufen wird:

Das Unternehmen hat ökologische und soziale Nachhaltigkeit entlang der gesamten Wertschöpfungskette, umfassende Produktverantwortung sowie ein klares Bekenntnis zur Schonung von Ressourcen fest in seiner Strategie verankert. (BMW GB 2010/Konzernporträt)

Wie in den Komposita bereits gezeigt, werden englische Äquivalenzen vielfach genutzt:

Unter Federführung der Abteilung Global Environmental Sustainability legen 16 Experten aus den verschiedenen Geschäftsbereichen und Konzerngebieten Leitlinien, Ziele und Maßnahmen fest und koordinieren deren Implementierung. (HeidelbergCement GB 2010)

DAIMLER äußert sich ausführlicher zu >Nachhaltigkeitsart< und führt diese textuell dreifach aus (,ökonomisch‘, ,ökologisch‘, sozial‘):

Ökonomische Nachhaltigkeit: Profitables Wachstum und langfristiger ökonomischer Erfolg sichern unser Engagement für eine nachhaltige Entwicklung. Als technologischer Schrittmacher der Automobilbranche wollen wir mit Spitzenleistungen überzeugen und die Zukunft einer sicheren und umweltverträglichen Mobilität gestalten. [...].

Ökologische Nachhaltigkeit: Umweltschutz, Innovation und Sicherheit sind die größten Herausforderungen auf unserem Weg zur Nachhaltigkeit. Unsere Pkw und Nutzfahrzeuge zählen in ihren jeweiligen Marktsegmenten in puncto Umweltschutz und Sicherheit zur Spitze. [...].

Soziale und gesellschaftliche Nachhaltigkeit: Wir verstehen uns als »mitgestaltender Akteur in der Gesellschaft«. Deswegen setzen wir uns für unsere Mitarbeiter, unsere Kunden und für die Menschen im Umfeld unserer Standorte ein. Denn wir profitieren von einer hoch motivierten und qualifizierten Belegschaft, von zufriedenen Kunden und von vertrauensvollen Beziehungen zu unseren Stakeholdern. [...]. (Daimler GB 2010)

Das von DAIMLER präsentierte Konzept >Nachhaltigkeitsart< (,ökonomisch‘, ,ökologisch‘ und ,sozial‘) wird fachsprachlich auch oft unter den Termini *Trinität* oder *Triple-Bottom-Line der Nachhaltigkeit* gefasst (vgl. Schönborn 2001, 3; Schwegler i.V.). Das *Triple* kann als hybrides Konzept aus den Bedeutungen ,ökonomisch‘, ,ökologisch‘ und ,sozial‘ verstanden werden. Dass die beschriebene Trinität auch auf andere Weise semiotisch fixiert wird, zeigt die Analy-

---

<sup>147</sup> Vgl. dazu: „Unsere Nachhaltigkeitsstrategie „Go sustainable 2012“ basiert auf vier Säulen: Qualität, Gesundheit und Umwelt; Energie- und Ressourcenmanagement; Mitarbeiter und Soziales; Gesellschaftspolitik und Stakeholder-Dialog.“ (Metro GB 2010).

<sup>148</sup> Vgl. dazu: „Auch für unsere Zulieferer haben wir eine weltweit gültige „Nachhaltigkeitsrichtlinie“ formuliert, die ebenso für deren Lieferanten gilt.“ (Daimler Unternehmensinformationen 2010).

<sup>149</sup> Vgl. dazu auch das musterhafte Syntagma *Prinzip\* der Nachhaltigkeit*: „Die Allianz hat sich zum Ziel gesetzt, das Bewusstsein dafür zu schärfen, dass das Prinzip der Nachhaltigkeit wirtschaftliches Wachstum fördert.“ (Allianz Grundsätze nachhaltiger Entwicklung).

se der Text-Bild-Ebene, wobei BEIERSDORF mit der ikonischen Form /Dreieck/ arbeitet:

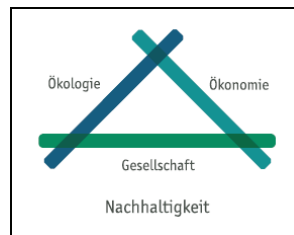

Abbildung 90 - BDF Nachhaltigkeitsbericht 2010

Daneben ist im Bereich der Syntagmen die Attribution von *Nachhaltigkeit* durch das Adverb *mehr* auffällig, wodurch ausgedrückt wird, „dass etwas über ein bestimmtes Maß hinausgeht, eine vorhandene Menge übersteigt“ (Duden 2001, 1065):

Höhere Effizienz und mehr Nachhaltigkeit im gesamten Geschäftsnetzwerk stehen auch künftig für Unternehmen im Mittelpunkt. (SAP GB 2010)

Diese Aussage dient als Forderung von SAP (an sich selbst), seine Nachhaltigkeitshandlungen auszuweiten bzw. impliziert, dass NACHHALTIGKEIT bisher nicht genügend verfolgt wurde. Ebenso lehnt sich dieses Muster wiederum an den ökonomischen Gedanken der Nutzenmaximierung an. Weitere syntagmatische Muster sind *X für Nachhaltigkeit* (›Nachhaltigkeit als Nutznießer‹) sowie *X zur Nachhaltigkeit* (›Nachhaltigkeit als Ziel‹):

Wir haben in diesem Sinne gehandelt und auch in der globalen Finanz- und Wirtschaftskrise unser Engagement für Nachhaltigkeit ausgebaut, anstatt es zu reduzieren. (Metro GB 2010)

In rechtsseitigen Anschlüssen zeigt sich *Nachhaltigkeit* beständig durch Adverbialien ergänzt, welche das Konzept ›Nachhaltigkeitslokalisierung‹ evozieren:

Zum siebten Mal hat Daimler 2010 den „Environmental Leadership Award“ (ELA) für wegweisende Projekte zur Weiterentwicklung von Umweltschutz und Nachhaltigkeit im Unternehmen durchgeführt. (Daimler Das Unternehmen 2011)

Meist wird durch *im Unternehmen* eine unternehmensinterne Lokalisierung von NACHHALTIGKEIT vorgenommen. Weitere rechtsseitige Syntagmen (Präpositionalattribute) rufen ›Nachhaltigkeitsträger‹ in der Form *Nachhaltigkeit von X* auf:

Die Ökoeffizienz-Analyse der BASF bewertet die Nachhaltigkeit von Produkten und hilft Kunden bei der Wahl optimaler Lösungen. (BASF GB 2010)

PRODUKTE sind somit sichtbare Träger von NACHHALTIGKEIT, die folglich das Konzept ›Nachhaltigkeit‹ materialisieren können.

Auf der Satzebene fallen die Kookkurrenzen von *Nachhaltigkeit* mit den Verben *bekennen*, *verpflichten* oder *leiten (lassen)* auf, die wiederum auf das Konzept ›Nachhaltigkeit ist in Unternehmen institutionalisiert‹ rückverweisen:

Verantwortungsvoll, exzellent und innovativ zu sein: Diese Ansprüche stellen wir an uns und unsere Arbeit. Hierbei lassen wir uns vom Prinzip der Nachhaltigkeit leiten – in ökologischer, wirtschaftlicher und gesellschaftlich-sozialer Hinsicht. (Siemens Unsere Werte)



Als Formulierungsvariante dient auch *Postulat der Nachhaltigkeit* (+ *verpflichten*), wodurch der deklarative Charakter der Aussage unterstützt wird:

Nur nachhaltiges Wirtschaften kann den Fortbestand, das Wachstum und den ökonomischen Erfolg eines Unternehmens dauerhaft sichern. Nicht zuletzt deshalb fühlen wir uns in der Tradition unserer Gründer Carl Benz und Gottlieb Daimler dem Postulat der Nachhaltigkeit verpflichtet. (Daimler GB 2010)

Um den Sachverhalt NACHHALTIGKEIT jedoch ganzheitlich zu erfassen, müssen auch adjektivische Versprachlichungen (durch *nachhaltig*\*+ X) analysiert werden. Durch die Beleuchtung der Substantive, die mit *nachhaltig*\* attribuiert werden, können zusätzliche ›Nachhaltigkeitsträger‹ erfasst werden. Auch hier zeigt sich die zunehmende Bindung von NACHHALTIGKEIT an die ›Nachhaltigkeitsträger‹ ‚Produkte‘, was lexikalisch durch *\*produkte* oder *\*lösungen* ausgedrückt wird:

Nachhaltige Transport- und Energielösungen, die ökologische und ökonomische Anforderungen vereinen, sind für MAN der Schlüssel zu einer erfolgreichen Produktpolitik. (MAN GB 2010)

Metonymisch findet sich speziell der Ausdruck *nachhaltige Mobilität* bei den Automobilisten:

Daimler will der Motor für nachhaltige Mobilität sein – mit zukunftsweisenden Lösungen für emissions- und unfallfreies Fahren. (Daimler Daimler hat das Automobil erfunden)

Konsumgüterhersteller und Dienstleister bedienen den *nachhaltigen Konsum*<sup>150</sup> sowie Banken das *nachhaltige Investment*. Diese Attributionen legen jedoch auch nahe, dass NACHHALTIGKEIT direkt an das UNTERNEHMEN gebunden wird (›Nachhaltigkeitsträger‹ ‚Unternehmen‘):

Das kanadische Medienunternehmen Corporate Knights Inc. nahm Henkel erneut in die Rangliste der weltweit 100 nachhaltigsten Unternehmen aus dem Morgan Stanley Capital Investment World Index auf. (Henkel GB 2010)

In anderen Fällen kann es dessen ‚unternehmerisches Handeln‘ (*nachhaltige\* Unternehmensführung/Wertschöpfungspolitik/Management/Handeln*) beschreiben:

Mit dem strategischen Ziel der nachhaltigen Wertschöpfung bekennt sich die MAN Gruppe zu einer nachhaltigen Unternehmensführung, die an das Unternehmen gerichtete Ansprüche in den Bereichen Integration, Umwelt, Ökonomie und Menschen umfasst. (MAN GB 2010)<sup>151</sup>

Das ‚unternehmerische Handeln‘ wird dabei besonders in Bezug auf die Ergebnisorientierung (*Output*) zugespitzt, was Syntagmen wie *nachhaltig\* + \*wachstum/\*ergebnisse*<sup>152</sup>/*\*erfolg/\*entwicklung* suggerieren. Dem Syntagma *nachhaltige Entwicklung* kann dabei Kollokationsstatus zugesprochen werden, wobei sich fachterminologisch auch der Anglizismus *Sustainable Development* etabliert hat:

Die Allianz verstärkt die bestehende Zusammenarbeit mit Regierungs- wie Nichtregierungsorganisationen und nutzt ihre Schnittstellen zur Gesellschaft, um eine nachhaltige Entwicklung zu fördern: durch Unter-

---

<sup>150</sup> Vgl. dazu: „Ziel ist es, gemeinsam den Bewusstseinswandel für nachhaltigen Konsum durch gesellschaftlichen Dialog voranzubringen.“ (Telekom GB 2010).

<sup>151</sup> Vgl. dazu: „Als Rohstoffunternehmen ist unsere Strategie nicht auf die Verfolgung kurzfristiger Renditeziele ausgerichtet, sondern auf nachhaltiges wirtschaftliches und Werte schaffendes Handeln – im Interesse aller unserer Stakeholder.“ (K+S GB 2010).

<sup>152</sup> Vgl. dazu: „Ausgezeichnete und nachhaltige finanzielle Ergebnisse ermöglichen es uns, in Zukunft flexibler handeln zu können.“ (Henkel Vision und Werte).



stützung von Initiativen zum Schutz der Umwelt, durch Einhaltung der internationalen Menschenrechte und durch Anwendung internationaler Sozialstandards. (Allianz Grundsätze nachhaltiger Entwicklung)

Wir bekennen uns zu den Prinzipien des Sustainable Development [...]. (Bayer Namen.Zahlen.Fakten 2010/2011)

Des Weiteren attribuiert *nachhaltig*\* auch Verben: Durch die Beleuchtung der Konstruktion *nachhaltig*\* + Verb kann das Konzept ›Nachhaltigkeitshandlung‹ transportiert werden: Am wichtigsten scheint dabei ‚nachhaltiges Wirtschaften‘:

Wir wirtschaften nachhaltig für eine lebenswerte Zukunft. (BASF GB 2010/Strategie und Werte)

Durch die hohe Frequenz kann man hierbei desgleichen davon ausgehen, dass es sich um eine diskurstypische Kollokation handelt, welche auch als Substantivierung (*Nachhaltiges Wirtschaften*) aufzufinden ist und damit den dahinterstehenden Sachverhalt als solchen festsetzt. Während die meisten Unternehmen einen hohen Absolutheitsanspruch bei der Versprachlichung von ‚nachhaltiges Wirtschaften‘ anzeigen, schränkt SAP diesen durch *bemühen* + Komparativ ein und schafft sich dadurch sprachliche Alleinstellung:

SAP bemüht sich nicht nur selbst stetig um ein nachhaltigeres Wirtschaften. Auch für unsere Kunden bieten wir eine breite Palette an Softwarelösungen, um sie bei der Umsetzung einer nachhaltigen Unternehmensstrategie zu unterstützen. (SAP GB 2010)

Eine weitere ›Nachhaltigkeitshandlung‹, die permanent aufgerufen wird, ist ‚nachhaltiges Handeln‘. Bei *nachhaltig*\* *Handeln* wird von der Kerntätigkeit eines Wirtschaftsunternehmens (*nachhaltiges Wirtschaften*) auf eine grundlegende, von Motiven geleitete, zielgerichtete Aktivität verwiesen (vgl. Duden 2001, 1820), die auf alle Unternehmensbereiche ausgeweitet werden kann:

Durch die langjährige Auseinandersetzung mit nachhaltigem Handeln haben wir eine ausgezeichnete Reputation als Unternehmen und weltweit führende Positionen erlangt. (Henkel GB 2010)

Auffallend ist in den Belegen zum Attribut ‚nachhaltiges Handeln‘ auch die Doppelung der Adjektive *verantwortungsvoll*\* und *nachhaltig*\* als Begriffspaar, durch welches eine Verknüpfung von NACHHALTIGKEIT und VERANTWORTUNG vorgenommen wird:

Nachhaltiges und gesellschaftlich verantwortliches Handeln heißt für uns, frühzeitig Antworten auf neue Herausforderungen zu finden. Dieses erfordert neben innovativen Lösungen in allen Bereichen der Wertschöpfungskette und der aufmerksamen Beobachtung und Bewertung globaler Megatrends effiziente Managementsysteme sowie den konstruktiven Dialog mit unseren Stakeholdern. (K+S GB 2010)

Als letzte syntagmatische Konstruktion, die musterhaft im Korpus auftritt, ist *nachhaltig* + Adjektiv zu nennen. *Nachhaltig* fungiert in diesen Fällen als Adverb und charakterisiert ›Nachhaltigkeitseigenschaften‹. Hauptsächlich wird dabei die lexikalische Integration durch *nachhaltig profitabel* oder partielle Synonyme (‚nachhaltige Profitabilität‘) vorgenommen:

Unser oberstes Unternehmensziel ist es, nachhaltig profitabel zu wachsen und damit den Wert des Unternehmens zu steigern. (Daimler GB 2010)

Wir wachsen in unseren Zielmärkten: Automobilelektronik, Industrielektronik und Sicherheit. Mit ambitionierten Zielen bei Umsatz und Ertrag. Das macht Infineon nachhaltig wertvoll. (Infineon GB 2010)

Es ließe sich in diesen Beispielen behaupten, da die Zufügung durch *nachhaltig* eigentlich nicht zum Verständnis der Aussage notwendig ist, dass die Adjektive *profitabel* oder *wertvoll* eher mit ‚kurzfristig‘ konnotiert sind. Durch die semantische Erweiterung mit *nachhaltig* wird jedoch der Aspekt ‚langfristig‘ ebenfalls aufgerufen. Laut Schönborn (2001, 1ff.) wird das Postulat der ‚Langfristigkeit‘ für Unternehmen wichtiger, da Aussagen zur langfristigen Unternehmenszukunft (potentielle) Investoren interessiert. Diese wollen wissen, ob ihre Gelder verantwortungsvoll genutzt werden (*nachhaltig* konnotiert auch ‚sicher‘).<sup>153</sup> Im folgenden Wortspiel von METRO wird eine weitere Bedeutung von *nachhaltig* eingeführt:

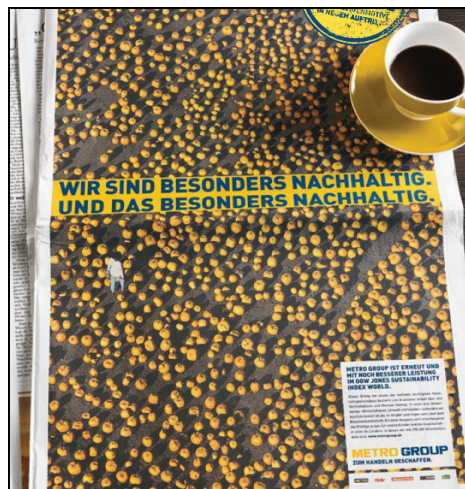

Abbildung 91 - Metro GB 2010

*Wir sind besonders nachhaltig* kann sich auf ‚langfristig‘, aber durch den Bildinhalt auch auf ‚ökologisch‘ beziehen. Im zweiten Satz *Und das besonders nachhaltig* ist dagegen ‚stark/intensiv‘ gemeint. Gohr (2002, 221) kritisiert die letztere Bedeutung als umgangssprachlich und unpräzise, was durchaus auch für diese im ersten Satz gelten kann. Auch die diskurstypischen metaphorischen Konstruktionen, welche NACHHALTIGKEIT (wie WERTE) dominant mittels der GRUND-/BASIS-/FUNDAMENT-Metaphorik verbinden, tragen nicht zur semantischen Differenzierung bei (z.B. ›Nachhaltigkeitsart‹):

Nachhaltigkeit ist das Fundament der Unternehmensstrategie von Volkswagen. Das bedeutet, dass wir den gesamten Wertschöpfungsprozess nachhaltig gestalten. (VW GB 2010)<sup>154</sup>

Als Verbmeter, die regelhaft in Bezug auf NACHHALTIGKEIT realisiert wird, zeigt sich *verankern*, was wiederum auf die ANKER-Metaphorik und das Konzept ›Nachhaltigkeit ist in Unternehmen institutionalisiert‹ zurückweist:

<sup>153</sup> Partizipien wie *nachhaltig orientiert\*/genutzt\** dienen ebenfalls als Gradmesser der Anzeige von ‚Langfristigkeit‘: „Bereits neun Prozent aller T-Aktien werden von nachhaltig orientierten Investoren gehalten. Wir wissen außerdem, dass viele unserer Aktionäre wertorientierte Anleger sind, die eher auf langfristige Stabilität [...] als auf kurzfristiges Wachstum setzen.“ (Telekom GB 2010).

<sup>154</sup> Vgl. dazu auch: „Grundprinzipien: Nachhaltigkeit.“ (Linde Der Linde Spirit); „Nachhaltiges Wirtschaften bildet die Basis für unsere Aktivitäten im Sinne aller Stakeholder.“ (Lufthansa GB 2010).

Indem wir weiterhin Nachhaltigkeit in unserem Geschäft verankern, sichern wir unseren langfristigen Erfolg, auch und gerade dann, wenn der Wandel sich beschleunigt. (Allianz GB 2010)

Schließlich fallen bei der Belegdurchsicht viele Sachverhaltsfestsetzungsversuche auf, die vermuten lassen, dass es sich bei NACHHALTIGKEIT durchaus um einen umstrittenen Sachverhalt handelt, bei dem Bedeutungsnuancierungen in einem konsensorientierten Diskurs vorgenommen werden (→ 8.2.1.2).<sup>155</sup> Daher finden sich häufig Versprachlichungen wie *Nachhaltigkeit/nachhaltig\* X bedeutet/heißt Y*:

Nachhaltig zu handeln heißt für uns deshalb, erfolgreich zu wirtschaften, umsichtig mit den Mitarbeitern umzugehen, sich gesellschaftlich zu engagieren und aktiven Umweltschutz zu betreiben. (BDF Imagebroschüre)

Während Aussagen wie diese (von BEIERSDORF) einen hohen Absolutheitsanspruch insinuierten, wird in den folgenden Belegen der Einschub *für uns/für Unternehmen Z* (Eigename) hinzugefügt und der Geltungsanspruch verkleinert; gleichzeitig werden *Nachhaltigkeit* und *Siemens* im folgenden Beleg direkt auf der Sprachoberfläche verknüpft:

Nachhaltigkeit bedeutet für Siemens, im Sinne künftiger Generationen verantwortungsvoll zu handeln, um wirtschaftlichen, ökologischen und sozialen Fortschritt zu erreichen. (Siemens GB 2010)

In diesen Festsetzungsversuchen wird die *Y*-Komponente (*Nachhaltigkeit/nachhaltig\* X bedeutet/heißt Y*) mittels der Konzeptattribute ‚Umweltverträglichkeit‘, ‚Wirtschaftlichkeit‘, ‚soziale/gesellschaftliche Verträglichkeit‘, ‚Bedenken künftiger Generationen‘, ‚Verantwortungsübernahme‘, ‚Mitarbeiterwertschätzung‘, ‚Zukunftsfähigkeit‘, ‚Förderung neuer Technologien‘, ‚Standortsicherung‘, ‚Stakeholderdialog‘ sowie ‚Antizipation von Problemen/Herausforderungen‘ gefüllt.<sup>156</sup> Schließlich können als Sachverhaltsfestsetzungsversuche auch Konstruktionen mit der Kopula *sein* gelten (*Nachhaltigkeit/nachhaltig\* X ist Y*):

Nachhaltiges Wirtschaften ist grundlegender Bestandteil der Unternehmensphilosophie von ThyssenKrupp. Wir stellen uns frühzeitig auf neue gesellschaftliche und wirtschaftliche Herausforderungen ein und sichern dadurch auch langfristig unsere Innovationsfähigkeit und ein nachhaltiges Wachstum. (ThyssenKrupp GB 2010)

Schließlich präsentieren sich auf der Sprachhandlungsebene, neben den Sachverhaltsfestsetzungsversuchen, auch Sachverhaltsverknüpfungen, wobei dominant die Sachverhalte NACHHALTIGKEIT und ERFOLG gekoppelt werden:

Nachhaltigkeit sichert den langfristigen Unternehmenserfolg. (HeidelbergCement GB 2010)

Der dabei zugrunde liegende Schluss ›Nachhaltigkeit führt zu wirtschaftlichem Erfolg‹ wird durch die kausale Präposition *durch* noch stärker deutlich, da den Aussagen ein kausaler Cha-

---

<sup>155</sup> Die Umstrittenheit kommt ebenso in diesen Formulierungen zum Ausdruck: „Bereits im Jahr 2008 haben wir den Dialog mit unseren Anspruchsgruppen intensiviert und den »Daimler Sustainability Dialogue« ins Leben gerufen.“ (Daimler GB 2010).

<sup>156</sup> Vgl. dazu auch die Bedeutungseinschränkung von METRO: „Nachhaltigkeit wird noch zu oft ausschließlich als Ressourcenschonung und Kosteneinsparung verstanden. Dabei bieten sich durch eine klare nachhaltige Ausrichtung bei der Produktstrategie und der Prozesssteuerung auch Wachstumschancen.“ (Metro GB 2010).

rakter zuteil wird, was LUFTHANSA im folgenden Beispiel veranschaulicht:

Grundlage aller Aktivitäten des Lufthansa Konzerns und wesentliche Voraussetzung für verantwortliches Handeln ist die langfristige Steigerung des Unternehmenswerts durch nachhaltiges Wirtschaften. (Lufthansa GB 2010)

Während in diesem Beleg ebenso die kausale Verknüpfung NACHHALTIGKEIT → ERFOLG konstruiert wird, kehrt METRO die Relation um (ERFOLG → NACHHALTIGKEIT):

Nachhaltigkeit und Profitabilität schließen sich nicht aus. Die Reihenfolge ist aber klar – nur ein profitables Unternehmen kann auch ein soziales und ökologisches Unternehmen sein. (Metro GB 2010)

ERFOLG (*Profitabilität, profitables Unternehmen*) wird durch diese Aussage eindeutig hierarchisiert und gleichzeitig ethisch legitimiert, da durch die Befolgung der VORAUSSETZUNG → ZIEL-Relation lediglich NACHHALTIGKEIT durch ÖKONOMISCHEN ERFOLG möglich wird. Dennoch wird gleichzeitig präsupponiert, dass NACHHALTIGKEIT und ÖKONOMISCHER ERFOLG einander teilweise entgegenstehen, was K+S zwar negiert, aber durch die Negation gerade präsupponiert:

Zudem werden wir bis zu 360 Mio. € zusätzlich in den regionalen Gewässerschutz investieren. Denn Wachstum und Nachhaltigkeit schließen sich nicht aus – sie sind wechselseitige Bedingung für eine wirtschaftlich erfolgreiche Unternehmensgruppe – jetzt und in Zukunft. (K+S GB 2010)

Neben diesen ökonomischen Tatbeständen fällt in der Folge die Verknüpfung von NACHHALTIGKEIT und VERANTWORTUNG auf, die bereits auf das nächste Kapitel verweist:

Um alle Tätigkeiten, die im Bezug zur unternehmerischen Verantwortung und zum nachhaltigen Wirtschaften im Lufthansa Konzern stehen, noch effektiver steuern zu können, wurde das bisher verantwortliche Nachhaltigkeits-Board erweitert und enger mit der Konzernstrategie verzahnt. (Lufthansa GB 2010)

Das Kapitel veranschaulichte somit, dass NACHHALTIGKEIT vor allem mittels des Konzeptes ›Nachhaltigkeit ist in Unternehmen institutionalisiert‹ aufgerufen und daher ein bedeutsames kokonstituierendes Element von UNTERNEHMENSIDENTITÄT ist (›Nachhaltigkeit ist Teil der Unternehmensidentität‹). Dadurch wird eine größtmögliche Anerkennung gesellschaftlicher Forderungen erzielt. Gleichzeitig versuchen die Unternehmen, NACHHALTIGKEIT als Sachverhalt festzusetzen und mit anderen ausgewählten Sachverhalten (ERFOLG, VERANTWORTUNG) zu verknüpfen. Die Bedeutung des Sachverhalts NACHHALTIGKEIT wird dabei mit den Attributen ‚ökologisch‘/‚ökonomisch‘/‚gesellschaftlich‘ sowie ‚langfristig‘ aufgerufen. Diese Bedeutungen sind jedoch häufig nicht klar getrennt. Die inhaltliche Sondierung scheint aufgrund des inflationären Gebrauchs der Ausdrücke um *\*nachhaltig\** sehr schwer, denn vielfach wird *Nachhaltigkeit* nicht durch einen Operator spezifiziert und bleibt semantisch opak,<sup>157</sup> da Unternehmen versuchen, so viele Bedeutungen wie möglich unter das Nachhaltigkeitskonzept zu

---

<sup>157</sup> Streng genommen handelt es sich dabei um eine Form der Bedeutungskonkurrenz, da das Hochwertwort *Nachhaltigkeit* bzw. der Ausdruckskomplex *nachhaltiges Handeln/nachhaltiges Wirtschaften* mit unterschiedlichen Bedeutungsdimensionen akzentuiert wird, d.h. bei der Präzisierung des Sachverhalts mit verschiedenen Konzeptattributen gearbeitet wird (→ 8.2.1.2).

subsumieren, um Kriterien von externen Rankings oder zertifizierenden Institutionen zu erfüllen.<sup>158</sup>

#### 1.2.5.4 VERANTWORTUNG

VERANTWORTUNG wird zahlreich im Diskurs referiert (\**verantwort*\* besitzt 1.442 *Hits* in den Konkordanzen; *Verantwortung* ist *Keyword* und Hochfrequenzwort) und erhebt durch die zahlreichen Verwendungsmuster<sup>159</sup> den Anspruch, eine Universalie zu sein, die auch innerhalb von UNTERNEHMENSIDENTITÄT einen festen Platz einnimmt – „denn wer Verantwortung trägt und übernimmt, wird gesellschaftlich anerkannt“ (Kopp 2012, 2). So tritt *Verantwortung* ebenfalls, wie *Nachhaltigkeit*, in Konkurrenz zu *Selbstverständnis* auf (>Verantwortung ist Teil der Unternehmensidentität<):

Die Wahrnehmung gesellschaftlicher Verantwortung gehört für uns untrennbar zu unserem unternehmerischen Selbstverständnis. (BMW GB 2010)

Auch Kläßen analysiert in ihrer Arbeit VERANTWORTUNG als „dominante Kategorie bei der Selbstdarstellung des Unternehmens“ (Kläßen 1999, 195). Neben der substantivischen Verwendung von *Verantwortung* als *Keyword* und Hochfrequenzwort im Korpus taucht ebenfalls die englische Variante *Responsibility* auf, die im inzwischen fachsprachlich genutzten *Corporate-Social-Responsibility-(CSR)-Begriff*, oder verkürzt als *Corporate Responsibility*, fixiert wurde:

Unternehmerische Verantwortung, Corporate Responsibility, ist Teil unserer Strategie. (MAN Unternehmensleitbild)

Die Wahrnehmung gesellschaftlicher Verantwortung (Corporate Social Responsibility, CSR) verstehen wir als bedeutenden Beitrag zu einer nachhaltigen Entwicklung unseres Unternehmens. (VW GB 2010)

\**Verantwortung*\* wird auf der erweiterten lexikalischen Ebene seltener als Konstituente innerhalb von Komposita verwendet, sodass man von einer hohen Semantizität des dahinterstehenden Begriffs >Verantwortung< – ähnlich wie bei >Nachhaltigkeit< – ausgehen kann. Dennoch finden sich für das Konzept >Verantwortungsart< die Attribute ‚Unternehmensverantwortung‘ und ‚Produktverantwortung‘:

Unternehmensverantwortung ist fest in unseren Werten verankert. (Adidas Leitbild und Werte)

Die ‚Produktverantwortung‘ bezieht sich damit v.a. auf die Überwachung des PRODUKTLEBENSZYKLUS und ist eng verbunden mit der ‚Umweltverantwortung‘, da durch PRODUKTION

---

<sup>158</sup> Vgl. dazu Schönborn (2001, 4): „Wer ökologisch nachhaltig wirtschaftet, stellt seine Zukunftsfähigkeit unter Beweis und dieses belohnt die Börse mit überdurchschnittlich steigenden Aktienwerten.“ Dies wird 1999 markiert durch die Einführung des *Dow Jones Sustainability Group Index* (DJSI) für ökologische und soziale Verantwortungsübernahme (= Indikator für nachhaltige Unternehmensführung). Vgl. dazu Schwegler i.V.

<sup>159</sup> Ebenfalls im politischen Diskurs ist eine hohe Frequenz von *Verantwortung*, *verantworten* sowie *verantwortlich* neben zahlreichen zusammengesetzten Formen festzustellen (vgl. Kopp 2012, 1f.). Jacob (2011, 101ff.) führt ebenfalls eine hochkonjunkturelle Verwendung von *Verantwortung* im Wirtschaftsdiskurs an und liefert eine Übersicht über Gebrauch und Perspektivierung des dahinterstehenden Konzeptes.



oder **ENTSORGUNG** die umgebende **UMWELT** möglicherweise belastet wird:

In Belgien und den Niederlanden werden im Rahmen der „Eco-Responsibility Campaign 2010“ in enger Kooperation mit Kunden sehr klinkerarme CEM II/B und CEM III Zemente auch für hochwertige Anwendungen wie die Fertigteilproduktion optimiert. (HeidelbergCement GB 2010)

Um *Verantwortung* in seiner diskursspezifischen Bedeutung auszubauen, wird anstelle der kompositorischen Nutzung<sup>160</sup>, welche bei den anderen Begriffen diskurstypisch auftaucht, viel häufiger die Attribution mittels Adjektiven vorgenommen (*x Verantwortung*). Bei BMW, DAIMLER, LUFTHANSA und MAN ist dieses Vorgehen besonders auffällig. In diversen Beispielen zeigt sich das Konzeptattribut ‚unternehmerische Verantwortung‘:

Wir sind uns unserer unternehmerischen Verantwortung bewusst und agieren stets verantwortungsvoll und nachhaltig. (Commerzbank Die Werte der Commerzbank)

LUFTHANSA differenziert ‚unternehmerische Verantwortung‘ text-bildlich aus, indem dieses mittels der Ausdrücke *Wirtschaftliche Nachhaltigkeit*, *Klima- und Umweltverantwortung*, *Soziale Verantwortung*, *Corporate Governance und Compliance* sowie *Corporate Citizenship* angereichert wird:

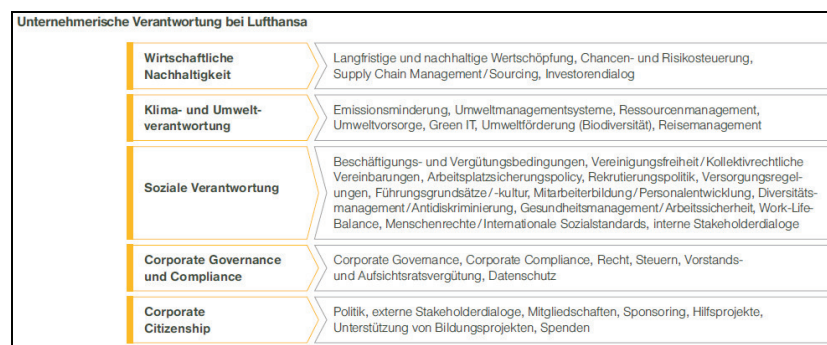

Abbildung 92 - Lufthansa GB 2010

In weiteren Belegen findet sich das Syntagma *unsere Verantwortung*, wodurch die ›Verantwortungsart‹ ‚besitzanzeigend‘ aufgerufen wird und das ‚Unternehmen‘ gleichsam als ›Verantwortungsträger‹ festgesetzt wird:<sup>161</sup>

Unsere Verantwortung liegt darin, das Unternehmen entsprechend den höchsten professionellen und ethischen Standards und Praktiken zu führen: ohne Spielraum für nichtkonforme Verhaltensweisen. (Siemens Unsere Werte)

Die ›Verantwortungsart‹, die jedoch hauptsächlich bei den untersuchten Unternehmen er-

<sup>160</sup> Vgl. dazu einzelne Komposita wie *Verantwortungsübernahme* und *Verantwortungspartnerschaften*: „Mit der Anfang 2010 eröffneten Konzernrepräsentanz in Berlin haben wir eine Plattform geschaffen, um den kontinuierlichen, offenen und transparenten Dialog mit Regierung, Parlament, Verbänden sowie relevanten Interessengruppen zu pflegen. Die METRO GROUP schafft so die Basis für Verantwortungspartnerschaften mit der Politik – national wie international.“ (Metro GB 2010).

<sup>161</sup> Teilweise zeigt sich dabei ein deontischer Anspruch, den der ›Verantwortungsträger‹ ‚Unternehmen‘ (*wir*) an sich selbst stellt (*gerecht werden, ernst nehmen, es ist unsere Verantwortung*). Dieses Ergebnis – in Bezug auf den ›Verantwortungsträger‹ ‚Unternehmen‘ – deckt sich mit Kopps (2012, 2) Befund, dass, „das Individuum als Träger von Verantwortung zunehmend von unpersönlichen Verantwortungsadressaten abgelöst wird [...]“. Kaum findet sich daher die ‚persönliche Verantwortung‘ im Korpus.



scheint, ist ‚gesellschaftliche Verantwortung‘:

Als weltweit führendes Chemieunternehmen verbinden wir wirtschaftlichen Erfolg mit gesellschaftlicher Verantwortung und dem Schutz der Umwelt. (BASF GB 2010)

Die DEUTSCHE BÖRSE formuliert konkret folgende Frage:

Worin besteht die gesellschaftliche Verantwortung einer Börse – und ganz konkret der Deutschen Börse? (Deutsche Börse Standpunkte)

Die ‚gesellschaftliche Verantwortung‘ ist auch in diversen Sachverhaltsfestsetzungsversuchen (auf der Textebene) vorhanden:

Gesellschaftliche Verantwortung. Als Energieversorger haben wir eine enge Bindung an unsere Standorte, die teilweise schon Jahrzehnte andauert. Wir sind dort verlässlicher Arbeit- und Auftraggeber und setzen uns für gesellschaftliche Belange ein. (RWE GB 2010)

Parallel findet sich auch die ‚soziale Verantwortung‘, v.a. bei DAIMLER:

Bei unseren mehr als 260.000 Mitarbeiterinnen und Mitarbeitern beginnt unsere soziale Verantwortung – aber hier hört sie noch lange nicht auf. (Daimler Das Unternehmen 2011)

Diese Befunde lassen vermuten, dass *soziale Verantwortung* eher die VERANTWORTUNG ‚nach innen‘ (MITARBEITER) und *gesellschaftliche Verantwortung* die VERANTWORTUNG ‚nach außen‘ (GESELLSCHAFT, gegenüber allen anderen) meint, was jedoch nicht immer trennscharf differenziert wird. Als weitere ›Verantwortungsart‹ zeigt sich ‚ökologische Verantwortung‘. Diese wird jedoch nur in Kombination mit ‚soziale Verantwortung‘ bzw. ‚gesellschaftliche Verantwortung‘ genannt:

Nachhaltigkeit bedeutet für uns einen dauerhaft positiven Beitrag zum ökonomischen Erfolg des Unternehmens. Sie ist die Basis für die Wahrnehmung der ökologischen und sozialen Verantwortung. (BMW GB 2010)

Als größtes Unternehmen unserer Branche nehmen wir unsere ökologische und gesellschaftliche Verantwortung ernst. (Deutsche Post GB 2010)

Als letztes erscheint, weniger häufig, die ‚räumliche Verantwortung‘:

Wir bauen auf lokale Verantwortung für globale Ziele. Weil wir weltweit zu den Besten gehören. (HeidelbergCement Corporate Mission)

Die Quantität der Belege zeigt: Vor allem ‚gesellschaftliche Verantwortung‘ und ‚soziale Verantwortung‘ als ›Verantwortungsart‹ werden von Unternehmen fokussiert. Dadurch erheben die Unternehmen den Anspruch, sich ins Gesamtsystem sozialer Systeme (der Gesellschaft) als Teilsystem einzuordnen, das sich mit seiner Umgebung austauscht sowie vice versa (→ 9.2.8.3).<sup>162</sup>

Des Weiteren erscheint auf der syntagmatischen Ebene die Konstruktion *Verantwortung für/gegenüber X* auf. Mithilfe dieser Präpositionalphrasen werden wiederum ›Verantwor-

---

<sup>162</sup> Vgl. dazu Ihlen (2012, 157): „Die Gesellschaft hat entschieden, dass Wirtschaftsinstitutionen gebraucht werden und es deshalb auch Aufgabe der Gesellschaft ist zu entscheiden, ob diese aufhören sollen, zu existieren. Legitimation kann in diesem Sinne als ausreichender öffentlicher Rückhalt für eine dauerhafte Existenz definiert werden.“.

tungsadressaten< evoziert. Hier bedienen Unternehmen sich abstrakter Füllungen für X, durch die generische Aussagen getroffen werden können. Diese werden meist dreifach sequentiell bzw. klimatisch gereiht: ‚Mensch/Individuum‘, ‚Gesellschaft/umgebende Umwelt‘ und ‚Umwelt/Gesamtsystem‘:<sup>163</sup>

Bei allem Ehrgeiz, hochgesteckte betriebswirtschaftliche Ziele zu erreichen, wollen wir unsere Verantwortung gegenüber den Menschen, der Gesellschaft und der Umwelt stets wahrnehmen. (Commerzbank Die Werte der Commerzbank)

Neben diesen hochfrequent angeführten ›Verantwortungsadressaten‹ tauchen auch häufig ‚Mitarbeiter (+ X)‘ auf:

Verantwortung für unsere Mitarbeiter übernehmen – das bedeutet in erster Linie Prävention und Vermeidung von möglichen Risiken. (Infineon GB 2010)

Um unserer Verantwortung gegenüber unseren Mitarbeitern und dem Unternehmen selbst gerecht zu werden, haben wir neben umfangreichen Re-Qualifikationsprogrammen insbesondere Instrumente zum freiwilligen Ausscheiden aus dem Unternehmen eingesetzt. (Telekom GB 2010)

Im letzten Beleg fällt auf, dass durch den Ausdruck *Unternehmen* das ‚Unternehmen‘ selbst zum ›Verantwortungsadressaten‹ wird und sich eine ‚wir-Gruppe‘ als ›Verantwortungsträger‹ abspaltet, die über RE-QUALIFIKATIONSPROGRAMME entscheidet. Des Weiteren ergeben sich als ›Verantwortungsadressaten‹ ‚(Umwelt +) Anspruchsgruppen‘ und ‚zukünftige Generationen‘:

Dauerhafter Wert und profitables Wachstum können nur geschaffen werden, wenn die MAN Gruppe ihre Verantwortung für die Umwelt sowie gegenüber den Stakeholdern wahrnimmt. (MAN GB 2010)

In vielen Fällen wird auch versucht, diverse ›Verantwortungsadressaten‹ zu akkumulieren:

Unser unternehmerisches Denken und Handeln ist von dem Bewusstsein unserer Verantwortung gegenüber unseren Kunden und Kapitalgebern, den Mitarbeitern und der Öffentlichkeit beherrscht. (Metro Corporate Principles)

MAN führt im *Leitbild* eine vierwertige Besetzung des Konzeptes ›Verantwortungsadressaten‹ textuell aus und leitet durch die formale Darstellung eine Sachverhaltsfestsetzung ein:

Verantwortung gegenüber dem Kunden: Wir machen die Ziele unserer Kunden zu unseren Zielen. Wir hören unseren Kunden zu und erfüllen ihre Anforderungen. Wir messen uns am Erfolg unserer Kunden durch unsere Produkte und Dienstleistungen. [...]

Verantwortung gegenüber dem Kapitalgeber: Wir setzen uns attraktive nachhaltige Renditeziele. Wir bauen unsere marktführende Position in den beiden Kerngeschäften gezielt aus. [...]

Verantwortung gegenüber dem Mitarbeiter: Führen bei MAN heißt, Verantwortung für Menschen zu übernehmen. Wir fordern und fördern unsere Mitarbeiter durch klare Ziele sowie verantwortungsvolle Aufgaben. Wir pflegen Fairness, Toleranz und Chancengleichheit. [...]

Verantwortung gegenüber der Gesellschaft: Wir übernehmen unternehmerische Verantwortung für Umwelt, Mitarbeiter und Gesellschaft. Wir orientieren uns an den Prinzipien der Nachhaltigkeit. Wir achten die Würde des Menschen. [...]. (MAN Unternehmensleitbild)

---

<sup>163</sup> Auffallend ist, dass bei Doppelungen (‚Mensch + Umwelt‘ oder ‚Umwelt + Gesellschaft‘) von einer Verbindung dieser Sachverhalte gesprochen wird, als ob sich diese diametral gegenüberständen: „Unser Anspruch, Produktleistung und Verantwortung für Menschen und Umwelt miteinander zu verknüpfen, treibt Innovationen voran und bringt uns und unseren Kunden auch wirtschaftlichen Erfolg.“ (Henkel GB 2010); „Erfolg mit Verantwortung für Umwelt und Gesellschaft zu verbinden.“ (BASF GB 2010).

Insgesamt zeigen die Belege zum Konzept ›Verantwortungsadressaten‹ an, dass der Verantwortungsbegriff im Diskurs als ein mehrdimensionales Relationenkonzept verstanden wird, unter welches diverse Personengruppen oder Lebensbereiche gruppiert werden können (vgl. Kopp 2012, 6).<sup>164</sup> Weitere rechtsseitige Kollokationen fokussieren wiederum das Konzept ›Verantwortungsträger‹ durch *Verantwortung als X*, indem meist das ‚Unternehmen‘ die X-Position einnimmt:

Teil unserer Unternehmensstrategie ist Corporate Responsibility: MAN wird nur erfolgreich sein, wenn wir unsere Verantwortung als Unternehmen wahrnehmen. (MAN Unternehmensleitbild)

Ebenso nehmen Unternehmen mittels der *als*-Phrase Rollenklassifikationen (→ 8.2.2) vor, indem Ausdifferenzierungen erfolgen (z.B. *wichtiger Arbeitgeber*):

Wir sind uns unserer Verantwortung als wichtiger Arbeitgeber in zum Teil strukturschwachen Regionen bewusst. (K+S GB 2010)

Auf der Satzebene findet sich das Konzept ›Verantwortungshandlung‹ realisiert, wenn man die regelhaften Verbindungen (teilweise Kollokationen) von *Verantwortung* + Verb beleuchtet. Besonders häufig ist hierbei das Attribut ‚Verantwortungsübernahme‘ realisiert:

Wir übernehmen Verantwortung für unsere Produkte, unsere Mitarbeiter und unsere Umwelt. Und wir übernehmen Verantwortung in der Gesellschaft, in der wir leben. Denn nicht nur Eigentum, sondern auch unternehmerischer Erfolg verpflichtet. (Merck Einzigartig – Der Merck Weg)

K+S steht für diese Werte, sie übernimmt Verantwortung für ihre Mitarbeiter, investiert in Sicherheit, Gesundheit und in sichere Arbeitsplätze. (K+S GB 2010)

Imperativische bzw. deontische Infinitive implizieren eine Aufforderung zur ‚Verantwortungsübernahme‘:

AufgabenVielfalt. Wer als Autobauer Zukunft gestalten will, muss über den Tag hinaus denken. Und heute Verantwortung übernehmen – für Umwelt Gesellschaft, Mitarbeiter und Kunden. (VW GB 2010)

Wie die Belege zeigen, wird ‚Verantwortungsübernahme‘ jedoch nicht weiter spezifiziert (wie, wann und wo, Verantwortung übernommen werden muss). Ebenfalls *zu*-Infinitive, die häufig in Verbindung mit *Verantwortung* + *Pflicht* oder *bereit sein* auftauchen, werden in dieser vagen Bedeutungskonstruktion genutzt.<sup>165</sup>

Transparenz fördert die Teilhabe aller im Unternehmen, die bereit sind, Verantwortung zu übernehmen. (Merck Merck Werte)

Der vielfache Gebrauch der Infinitive verweist auf die übergeordnete Perspektive von ‚Verantwortungsübernahme‘ als ›Prospektiv-Verantwortung‹. Es geht nicht um VERANTWORTUNG für Handlungsfolgen nach dem Verursacherprinzip (auf die Vergangenheit gerichtet),

---

<sup>164</sup> Seltener finden sich ‚Erfolg‘, ‚Produkte‘ und ‚Zukunft‘: „In beiden Unternehmensbereichen ist die Verantwortung für die Produkte der Kern unserer Unternehmensverantwortung.“ (Merck GB 2010).

<sup>165</sup> Auffällig ist in den Belegen, dass mittels der imperativischen bzw. deontischen Infinitive und *zu*-Infinitive auch Bedeutungsfixierungsversuche vorgenommen werden (*X heißt Y*): „Ein guter Nachbar zu sein, heißt für Linde, Verantwortung zu übernehmen: als Wirtschaftspartner, als attraktiver Arbeitgeber und als Mitglied der Gesellschaft, das aktiv zum sozialen Miteinander beiträgt.“ (Linde GB 2010); „Führen bei MAN heißt, Verantwortung für Menschen zu übernehmen.“ (MAN Unternehmensleitbild).

sondern ‚Verantwortungsübernahme‘ als vorgängige Auslegung von Tun und damit verbundenen Konsequenzen. Diese Perspektive erlaubt „Intervention und gedanklich-antizipatorische Korrektur durch Überlegung. Ihr ist die Konnotation der Fürsorge inhärent“ (Kopp 2012, 8f.). Die ›Verantwortungshandlung‹ ‚Verantwortung tragen‘ verstärkt indessen die Vorstellung einer aktiv eingeräumten VERANTWORTUNG, die durch *tragen* in situ stattfindet:

Wir bieten unseren Kunden außer Markenprodukten bekannter Hersteller eine Vielzahl hochwertiger Eigenmarkenartikel. Für diese tragen wir unmittelbar Verantwortung. Das bedeutet unter anderem, dass wir für die Qualitätssicherung zuständig sind. (Metro GB 2010)

‚Verantwortung tragen‘<sup>166</sup> bezieht sich in diesem Beleg konkret (*unmittelbar*) auf PRODUKTE und auf NACHSORGE (*Qualitätssicherung* bei ANWENDUNG/ENTSORGUNG) und wird seltener sprachlich mit Infinitiven genutzt. Eine weitere ›Verantwortungshandlung‹ ist die ‚Verantwortungswahrnehmung‘. Hierbei erkennen Unternehmen wiederum nur sinnlich an, dass eine Verantwortungssituation besteht. *Wahrnehmen* (*sehen* bzw. *bewusst sein*) bedeutet nicht die tatsächliche Übernahme von VERANTWORTUNG:

Die BMW Group nimmt ihre ökologische und soziale Verantwortung wahr: Sie bekennt sich zu den Prinzipien des Global Compact der Vereinten Nationen [...]. (BMW Verhaltenskodex)

Als Energieunternehmen sehen wir uns in der Verantwortung, zum endgültigen Durchbruch der Erneuerbaren Energien beizutragen und sie technologisch und wirtschaftlich im industriellen Maßstab verfügbar und nutzbar zu machen. (E.ON Cleaner and better energy)<sup>167</sup>

Dagegen wird ‚Verantwortungsumsetzung‘ mittels Verben wie *stellen*<sup>168</sup>, *gerecht werden*<sup>169</sup>, *zeigen* oder *umsetzen* eingeräumt:

Wir zeigen Verantwortung für unsere Kollegen, Kunden und Lieferanten sowie für unsere Umwelt und die Gesellschaft, in der wir leben und arbeiten. Dort wo wir tätig sind, wollen wir die Lebensqualität verbessern. (E.ON Unsere Werte)

Wie sich im folgenden Beispiel von THYSSENKRUPP zeigt, versuchen Unternehmen auch Beweise aus der Praxis für das Konzeptattribut ‚Verantwortungsumsetzung‘ anzuführen, was bereits im Kapitel Bezugnahme auf ein BEISPIEL (→ 8.2.3.3) gezeigt wurde.<sup>170</sup> Wie im Textausschnitt von THYSSENKRUPP exemplifiziert wird (→ Abb. 93), nehmen diese Ausführungen durchaus breitere Textumfänge (mit narrativen Sequenzen) ein und gehen einher mit Sachverhaltsfestsetzungsversuchen von GESELLSCHAFTLICHE VERANTWORTUNG:

---

<sup>166</sup> Vgl. auch hierzu die Bedeutungsfixierungsversuche: „Verantwortung tragen bedeutet unter anderem aber auch, langfristige Nachwuchssicherung zu betreiben.“ (Daimler Das Unternehmen 2011).

<sup>167</sup> Vgl. dazu auch: „K+S ist sich der besonderen Verantwortung bewusst, die mit der Nutzung von natürlichen Ressourcen verbunden ist.“ (K+S GB 2010).

<sup>168</sup> Vgl. dazu: „Im täglichen Umgang mit den natürlichen Ressourcen der Erde stellen wir uns der Verantwortung, um die Bedürfnisse von Mensch und Natur in Einklang zu bringen.“ (K+S GB 2010).

<sup>169</sup> Vgl. dazu: „Alle Fluggesellschaften des Verbunds haben das Ziel, profitabel zu wachsen. [...]. Zugleich werden die Gesellschaften durch nachhaltiges Wirtschaften ihrer Verantwortung für den Erhalt natürlicher Ressourcen gerecht.“ (Lufthansa GB 2010).

<sup>170</sup> Vgl. dazu auch: „Unsere Verantwortung als Gesundheitskonzern reicht über unser operatives Geschäft hinaus. Beispielhaft dafür steht eine konzernweite Hilfsaktion für die Opfer des Erdbebens in Haiti zu Beginn des Jahres 2010. Fresenius arbeitete mit Behörden und internationalen Hilfsorganisationen in der Region zusammen und stellte Hilfsgüter zur Behandlung von mehr als 185.000 Patienten bereit.“ (Fresenius GB 2010).

#### VERANTWORTUNG UMSETZEN

Die Auswirkungen der neuen Anlage auf die Region sind vielfältig. Das Verarbeitungswerk wird in Calvert 2.700 qualifizierte Dauerarbeitsplätze in allen Bereichen von Produktion und Verwaltung bieten. Zur Qualifikation der Mitarbeiter wird umfassend in Ausbildung und Fortbildung investiert, unter anderem durch das Maßstäbe setzende Erich Heine-Ausbildungszentrum. Ebenfalls positiv wirken sich für die Region die zahlreichen weiteren Arbeitsplätze aus, die indirekt als Folge der Ansiedlung entstehen. Wie an allen Standorten weltweit engagiert sich ThyssenKrupp auch in Alabama gesellschaftlich. Unter anderem werden Bildung und soziale Projekte gefördert, mit gesellschaftlichen Organisationen, Schulen und Universitäten werden Partnerschaften entwickelt.

Abbildung 93 - ThyssenKrupp GB 2010

Anaphorische Aufnahmen, wie in Folge bei MERCK, wirken ebenfalls festsetzend, wobei *Verantwortung* durch die Repetition und die agentivische Stellung an Bedeutsamkeit gewinnt:

Verantwortung bestimmt unser unternehmerisches Handeln. Verantwortung kennzeichnet unser Handeln gegenüber unseren Kunden, Mitarbeitern, Kapitalgebern und Partnern. Verantwortung bedeutet den schonungsvollen Umgang mit den natürlichen Ressourcen und wachsame Vorsorge für unsere Umwelt. [...] . (Merck Merck Werte)

Der Sachverhalt VERANTWORTUNG wird gleichzeitig auch über adjektivische Realisierungen konstituiert (*verantwortlich\**, *verantwortungsvoll\**), die zum Bedeutungsumfang gehören, jedoch von Unternehmen semantisch nicht immer differenziert werden:

Wir sind überzeugt, dass gemeinsame Werte, die sowohl nach innen als auch nach außen gelebt werden, die beste Basis für unser verantwortliches Handeln sind. (Commerzbank Die Unternehmenskultur der Commerzbank)

Ein ‚verantwortliches Handeln‘ kann nach Kopp streng genommen nur PERSONEN zugesprochen werden, „die bewusst gehandelt haben. Hierfür ist die Fähigkeit der Antizipation, des Vorausdenkens und des Bedenkens der Folgen einer Handlung notwendig“ (Kopp 2012, 6). Diese Prämisse wird von Unternehmen allerdings übergangen und nur in geringem Ausmaß durch das Adjektiv *eigenverantwortlich* an konkrete ‚Personen‘ (‚Mitarbeiter‘) gebunden. Meist ist das Kollektiv ‚Unternehmen‘ abermals ›Verantwortungsträger‹:

Im Rating von oekom research hat Daimler erneut den Status „Prime Investment“ erhalten. Dieses ist für uns eine Bestätigung, die Strategie des nachhaltigen und gesellschaftlich verantwortlichen Wirtschaftens konsequent fortzusetzen. (Daimler Das Unternehmen 2011)

Das gemeinsame Auftreten von *verantwortlich\** mit *nachhaltig\** und *gesellschaftlich\** ist nicht nur bei DAIMLER als sprachliches Muster auffindbar und bringt VERANTWORTUNG wiederum in die Nähe von NACHHALTIGKEIT und GESELLSCHAFT. Durch das Halbsuffix *-voll* (*verantwortungsvoll*) bekommt ‚verantwortliches Handeln‘ zusätzlich eine aktivische, positiv wertende Bedeutung (vgl. Weinrich/Thurmair 2007, 1005):

Seit jeher bilden langfristiges Denken und verantwortungsvolles Handeln die Grundlage unseres wirtschaftlichen Erfolgs. (BMW GB 2010/Konzernporträt)

*Verantwortungsbewusst\** unterstreicht indessen den mentalen Aspekt (s.o.):

Prägende Rahmenbedingungen wie der Klimawandel, der technologische Fortschritt, die globalisierten Finanzmärkte sowie der demografische Wandel stellen wesentliche Herausforderungen dar. Vorausschauendes



und verantwortungsbewusstes Handeln in allen Unternehmensbereichen ist daher fester Bestandteil unseres Geschäftsmodells. (Munich Re GB 2010)

Im folgenden Beleg wird *verantwortungsbewusst\** direkt an *Selbstverständnis* rückgebunden:

Das Leitbild definiert unser Selbstverständnis als erfolgreiches und verantwortungsbewusstes Unternehmen. (Merck Stabile Einheit: Leitbild, Werte, Strategie)

*Verantwortlich\**, *verantwortungsvoll\** sowie *verantwortungsbewusst\** erscheinen in diversen Belegen zudem gemeinsam mit dem Verb *handeln*, um auf den Sachverhalt VERANTWORTUNG Bezug zu nehmen,<sup>171</sup> wobei einzelne Unternehmen keinen Unterschied zwischen den beschriebenen Adjektiven zu machen scheinen, z.B. ADIDAS:

Wir sind ein globales Unternehmen das sozial und ökologisch verantwortungsbewusst handelt, kreativ ist, Vielfalt wertschätzt und seinen Mitarbeitern und Aktionären finanzielle Attraktivität sichert. (Adidas GB 2010/Corporate Mission Statement)

Für den Adidas Konzern bedeutet verantwortliches Handeln: Die Arbeitsbedingungen in den Fabriken unserer Zulieferer zu verbessern [...]. (Adidas Leitbild und Werte)

Viele Unternehmen verweisen daher, ohne sich semantisch festlegen zu müssen, auf das *Leitbild* „*Verantwortliches Handeln in der Wirtschaft*“:

Im November 2010 hat Merck das Leitbild „Verantwortliches Handeln in der Wirtschaft“ unterzeichnet, eine Initiative von Unternehmen der deutschen Wirtschaft, die sich zum Ziel gesetzt hat, überprüfbare Standards beispielsweise zu fairem Wettbewerb, Sozialpartnerschaft, Leistungsprinzip und Nachhaltigkeit fest in den beteiligten Unternehmen zu verankern. (Merck GB 2010)

Das *Leitbild* fixiert damit *überprüfbare Standards* als Wissen um das Konzept ›Verantwortungshandlung‹. Normierend wirken auch weitere intertextuelle Verweise auf die *Corporate Governance* (→ 5.2.2.6) oder den *Code of Conduct*:

Unser Verständnis von verantwortungsbewusstem Handeln haben wir für alle Mitarbeiter weltweit im Code of Corporate Sustainability und im Code of Conduct konkretisiert. (Henkel GB 2010)

Des Weiteren evozieren die Adjektive *verantwortlich\**, *verantwortungsvoll\** und *verantwortungsbewusst\** die Konzeptattribute ‚Unternehmensführung‘<sup>172</sup>, ‚Verhalten‘<sup>173</sup> sowie ‚Wertschöpfung (Produktion)‘<sup>174</sup>, sodass alle Teilsysteme des Unternehmens mit VERANTWORTUNG in Kontakt kommen. Diese Vorstellung lehnt sich an die Personalisierung des UNTERNEHMENS als GESELLSCHAFTSMITGLIED an, das durch die Metaphern *verantwortliches Mitglied der Gesellschaft/Unternehmensbürger(Corporate Citizen)* expliziert wird:

Entsprechend unserem Selbstverständnis als einem verantwortlichen Mitglied der Gesellschaft leisten wir in den Bereichen Soziales, Umwelt, Bildung, Wissenschaft, Gesundheit, Sport, Kunst und Kultur finanzielle Unterstützung für eine Vielzahl von Projekten mit einem Gesamtvolumen von 2,9 Mio. Euro im Jahr 2010. (Henkel GB 2010)

---

<sup>171</sup> Vgl. dazu: „Wir handeln verantwortungsvoll gegenüber Kunden, Mitarbeitern, Geschäftspartnern und Mitgesellschaftern, den Aktionären und der Umwelt.“ (HeidelbergCement Corporate Mission).

<sup>172</sup> Vgl. dazu: „Eine verantwortungsbewusste Unternehmensführung muss auf oberster Ebene verankert sein.“ (RWE Unsere Verantwortung 2010).

<sup>173</sup> Vgl. dazu: „Für einen verantwortungsvollen, korrekten und gesetzeskonformen Umgang unserer Mitarbeiter mit Patienten und Geschäftspartnern gibt der Unternehmenskodex [...] den Rahmen vor.“ (FMC GB 2010).

<sup>174</sup> Vgl. dazu: „Wir sorgen durch verschiedene Maßnahmen für eine verantwortliche Beschaffung unserer wichtigsten Güter und Rohstoffe.“ (E.ON Cleaner and better energy).



In diesem Beleg von HENKEL zeigt sich eine direkte Bindung an UNTERNEHMENSIDENTITÄT durch das Lexem *Selbstverständnis* und die klassifizierende *als*-Phrase. Das *Corporate-Citizen*-Prinzip (vgl. Schönborn 2001, 6) geht dabei davon aus, dass Unternehmen bestimmte VERANTWORTLICHKEITEN (*Corporate (Social) Responsibilities (CSR)*) innerhalb des Restsystems (= der Gesellschaft und der Umwelt) eingehen (vgl. Freeman 1984), welche im Diskurs als *Pflichten* bezeichnet werden:

Als weltweiter Corporate Citizen in einer globalisierten Welt erfüllen wir an allen unseren Standorten unsere gesellschaftlichen Pflichten und übernehmen bewusst Verantwortung für Umwelt, Mitarbeiter und Gesellschaft. (MAN Unternehmensleitbild)

Hiermit konzeptualisieren sich die Unternehmen erneut als komplexe ›Verantwortungsträger‹ in einer Verantwortungssituation, indem sie für ›Verantwortungsadressaten‹ (*Umwelt, Mitarbeiter und Gesellschaft* etc.) *Verantwortung übernehmen*. Da sie dies tun, bewerten sie sich selbst in Folge als *guter Unternehmensbürger*, was eine Anthropomorphisierung der sozialen und gesellschaftlichen VERANTWORTLICHKEITEN darstellt:

Verantwortung übernehmen wir als »guter Unternehmensbürger« in den Gesellschaften, in denen wir weltweit tätig sind. Verantwortung haben wir auch für unsere Mitarbeiter, für die wir dauerhaft ein attraktiver Arbeitgeber sein wollen. (Siemens Unsere Werte)

Im Beleg von SIEMENS zeigen die Absetzungen durch Anführungszeichen (»«) jedoch auch eine Distanzierung von der wörtlichen Bedeutung des Ausdrucks *guter Unternehmensbürger* an. Dass die *CSR/CR*-Bewegung desgleichen als ›Verantwortungsfixierung‹ gelten kann, wird in den Belegen vielfach offenbar:<sup>175</sup>

Die CR-Strategie der MAN Gruppe basiert auf einer guten Corporate Governance und schafft Mehrwert für die Gesellschaft. Die vier Dimensionen der CR-Strategie wurden durch Handlungsfelder konkretisiert, die für MAN als vordringlich gelten. Sie wurden vom MAN-Vorstand ebenso bekräftigt wie der CR-Fahrplan, der in allen vier Dimensionen konkrete Ziele bis zum Jahr 2015 definiert. (MAN GB 2010)

Schließlich wird die *CR-Strategie* wiederum im Kontext von *Selbstverständnis* aufgefunden:

Vorausschauendes und verantwortungsbewusstes Handeln in allen Unternehmensbereichen ist daher fester Bestandteil unseres Geschäftsmodells. Dieses Selbstverständnis haben wir in unserer Corporate Responsibility-Strategie beschrieben. (Munich Re GB 2010)

Dieses Kapitel zeigt, dass VERANTWORTUNG vor allem mit den Attributen ‚gesellschaftlich‘ und ‚sozial‘ (*Corporate Social Responsibility (CSR)*, *Corporate Citizen*) aufgerufen wird. ‚Unternehmen‘ sind dahingehend ›Verantwortungsträger‹ in der Gesellschaft. Dabei ist die konstituierte VERANTWORTUNG meist eine ›Prospektiv-Verantwortung‹, d.h. es wird antizipiert, dass und für welche ›Verantwortungsadressaten‹ (u.a. durch die Ausdrücke *Mitarbeiter, Gesellschaft, Stakeholder*) Verantwortung übernommen wird bzw. werden muss (›Verantwor-

---

<sup>175</sup> Vgl. zum *CSR-Bericht Deutsche Börse Standpunkte*. Auf *CSR* wird auch durch Bezugnahme auf *INDIZES (FTSE4Good Index)* oder *INSTITUTIONEN (Geschäftsstellen, Netzwerke, Councils)* referiert: „Bereits seit 2006 koordiniert die CSR-Geschäftsstelle die Unternehmensaktivitäten rund um die Themen *CSR* und Nachhaltigkeit im Volkswagen Konzern.“ (VW GB 2010).

tungshandlung<). Wenn man den Verantwortungsbegriff jedoch klassischerweise als mehrdimensionales Relationenkonzept auffasst, bleibt dieser unter dem „Hochwertwort-Deckmantel“ (Jacob 2011, 101ff.) im Diskurs begriffsleer, da manche Dimensionen nicht besetzt werden: >Verantwortungsinstanzen< und >Verantwortungskriterien< sind häufig nicht erwähnt, vor und nach denen sich Unternehmen verantworten – dafür wird umso stärker eine PFLICHT (*Pflicht*, *verpflichten*) konstituiert, dass man VERANTWORTUNG zu übernehmen habe (,Verantwortungswahrnehmung‘). Die Übernahme von VERANTWORTUNG wird daher unhinterfragt als grundlegend und identitätsstiftend festgelegt und durch *CR-Strategien* fixiert (>Verantwortungsfixierung<).

#### 1.2.5.5 VERPFLICHTUNG

In Verbindung zum Sachverhalt VERANTWORTUNG sowie lexikalisch zu *Selbstverpflichtung* (→ 9.1.5) tritt der Sachverhalt VERPFLICHTUNG auf. Das Verb *verpflichten* bzw. das Substantiv *Verpflichtung* (\**verpflicht*\* besitzt 583 *Hits* in den Konkordanzen) tragen beide eine deontische Funktion (Obligationsfunktion), da ein Akteur sich in einer bindenden Zusage auf etwas festlegt (vgl. Duden 2001, 1711). Auf diese VERPFLICHTUNG wird meist in reflexiver Form mittels Verben Bezug genommen (*X hat/haben sich verpflichtet*):

Schon seit 1995 haben wir uns dem Klimaschutz verpflichtet. (Telekom GB 2010)

Durch die Fügungen im Perfekt wird dabei ausgedrückt, dass die >Verpflichtungshandlung< bereits ,vorgenommen‘ wurde. Im Gegensatz dazu drückt die Verbhandlung *sich verpflichtet (fühlen)* + Dativ zwar den reflexiven Rückbezug zum UNTERNEHMEN aus, impliziert jedoch nicht automatisch die tatsächliche Durchführung der VERPFLICHTUNG (>Verpflichtungshandlung<):

Als aktiver Teil der Gesellschaft fühlen wir uns darüber hinaus vielen weiteren Anspruchsgruppen verpflichtet. Mit vollem Engagement wollen wir weiterhin helfen und unterstützen – überall auf der Welt. (Daimler Unternehmensinformationen 2010)

Die >Verpflichtungsinstanz< im letzten Beleg ist das ,Unternehmen‘ selbst, da es um eine ,empfundene‘ VERPFLICHTUNG geht. Zugleich ist es aber auch >Verpflichtungsträger<, was im folgenden Beleg bei BASF explizit durch die Apposition syntaktisch markiert wird:

Wir, die Mitarbeiterinnen und Mitarbeiter der BASF-Gruppe, fühlen uns gemeinsam folgenden Grundwerten verpflichtet: [...]. (BASF Vision.Grundwerte.Leitlinien)

In allen gesichteten Belegen treten durch die transparente syntaktische Struktur daneben die >Verpflichtungsobjekte< anschaulich hervor, d.h. wem oder was man sich *verpflichtet hat/fühlt* (,Werte‘, ,Umweltschutz‘, ,Klimaschutz‘, ,Sicherheit‘, ,Anspruchsgruppen‘). Auf der Satzebene fallen darüber musterhaft realisierte Infinitivkonstruktionen mittels der deklarativen Aussage *verpflichten* + *zu*-Infinitiv auf:

Wir verpflichten uns, für die Sicherheit und Gesundheit unserer Mitarbeiter, den Schutz unserer Umwelt und die Lebensqualität der Menschen in unserem Umfeld zu sorgen. (Henkel Vision und Werte)

Dabei zeigt sich die rekurrente Verbindung von *verpflichten* mit dem Adjektiv *freiwillig*\*, was inhaltlich paradox erscheint, jedoch die Ausdrucksfunktion der Aussage unterstützt, da auf die ›Verpflichtungsart‹ ‚freiwillig‘ hingewiesen wird:

Ebenso erwarten wir von unseren Mitarbeitern verantwortliches Handeln und das Einhalten geltender gesetzlicher Bestimmungen und ethischer Grundsätze, zu denen wir uns – etwa im Rahmen der freiwilligen Wirtschaftsinitiative „Global Compact“ der Vereinten Nationen – freiwillig verpflichten. (Daimler Unternehmensinformationen 2010)

Während in diesem Beleg das Attribut ‚freiwillig‘ im Fokus steht, rufen Aussagen mittels *verpflichtet (sein) zu X* die ›Verpflichtungsart‹ ‚gefordert‘ auf, wobei das ‚Unternehmen‘, als ›Verpflichtungsträger‹ von einer nicht realisierten ›Verpflichtungsinstanz‹ verpflichtet wird:

Wir sind der fortwährenden Stärkung der Marken und Produkte verpflichtet, um unsere Wettbewerbsposition zu verbessern. (Adidas GB 2010/Corporate Mission Statement)

Wir achten die Würde des Menschen. Das Recht des Menschen auf ein Leben in Würde und Freiheit achten wir bei all unseren weltweiten Aktivitäten. Die MAN Gruppe ist diesem Grundsatz verpflichtet. (MAN Unternehmensleitbild)

Markant sind auch weitere Verkürzungen, in denen weder ›Verpflichtungsinstanz‹ noch ›Verpflichtungsträger‹ angeführt werden:

Der Zukunft verpflichtet. (BDF Imagebroschüre)

Der Spitzenleistung verpflichtet. (Daimler Verhaltensrichtlinien)´

Nur an wenigen Stellen wird die ›Verpflichtungsinstanz‹ direkt sprachlich realisiert:

Tradition verpflichtet. Unsere Vorreiterrolle als Pionier der Automobiltechnik verpflichtet uns dazu, nachhaltige Mobilität und damit Umweltschutz, Innovation und Sicherheit als die wichtigsten Herausforderungen unseres Unternehmens zu sehen. (Daimler Das Unternehmen 2011)

Nachbarschaft verpflichtet. Linde ist weltweit in mehr als 100 Ländern vertreten. Diese globale Präsenz erfordert eine unternehmerische und gesellschaftliche Verantwortung, die über die Ländergrenzen hinausreicht. Linde engagiert sich überall dort, wo seine Mitarbeiter leben und arbeiten – egal in welchem Teil der Welt. (Linde GB 2010)

Diese Belege<sup>176</sup> sind aufschlussreich, da durch die (nicht) genannte ›Verpflichtungsinstanz‹ die Notwendigkeit der ›Verpflichtungshandlung‹<sup>177</sup> erst legitimiert wird, was Unternehmen wiederum motivunabhängige Beweggründe zum Handeln schafft (vgl. Searle 2009, 105). Im Beispiel von LINDE werden etwa durch ‚Nachbarschaft‘ mögliche ‚wirtschaftliche Handlungen‘ (*über Ländergrenzen*) legitimiert. Im Gegensatz zur Semantik der (*Selbst*-)Verpflichtung ist beim Ausdruck *Versprechen*, der als partielles Synonym auftaucht, der „Beweggrund, es zu tun, von [...] eigenen Motiven und Wünschen abhängig“ (Searle 2009, 105). Das Verspre-

---

<sup>176</sup> Vgl. dazu auch: „Premium verpflichtet.“ (BMW GB 2010/Strategie); „Exzellenz verpflichtet.“ (Daimler Unternehmensinformationen 2010).

<sup>177</sup> Eine weitere ›Verpflichtungshandlung‹ findet sich durch *Verpflichtung* + Verb: „Bei ThyssenKrupp sehen wir uns auch in der Verpflichtung, uns aktiv in den öffentlichen Meinungsbildungsprozess einzubringen und zu gesellschaftlichen Themen Stellung zu beziehen, insbesondere wenn sie einen besonderen Bezug zur wirtschaftlichen Entwicklung haben.“ (ThyssenKrupp GB 2010).

chen erwächst einer freiwilligen Kundgabe, erhält jedoch, sobald es als gültig anerkannt wird, auch den Status einer Verpflichtung (vgl. Searle 2009, 105). Durch Verben wie *erfüllen* oder *halten* im Kontext von *Versprechen*, wird die Obligationsfunktion unterstrichen und die semantische Nähe von VERSPRECHEN zur VERPFLICHTUNG nochmals deutlich:

Der Claim „The Chemical Company“ ist Ausdruck unseres Versprechens, ein verlässlicher Partner zu sein, der mit innovativen Produkten hilft, die Zukunft erfolgreich zu gestalten. Um unser Versprechen zu erfüllen, setzen wir unser Fachwissen und unsere ganze Leidenschaft ein. (BASF Gemeinsam Zukunft gestalten)

*Versprechen* wird zudem auf Satz- und Textebene aufgegriffen und als komplexer Sachverhalt VERSPRECHEN mittels eines Leitsatzes oder Kurztextes fixiert:

Erstklassige Produkt- und Service- Qualität, Wirtschaftlichkeit, Zuverlässigkeit und Nachhaltigkeit – dafür steht das Versprechen „Trucks you can trust“ in Europa und Lateinamerika. (Daimler Das Unternehmen 2011)

Unser Versprechen: Was unsere Anspruchsgruppen von unserer Marke erwarten können: Spitzenleistungen bei der Entwicklung und Umsetzung von Konzepten, in der Beratung, bei Produkten und im Service – stets EINE Bank repräsentierend mit all ihren Fähigkeiten und Ressourcen. (Deutsche Bank Leitbild und Marke)

Schließlich ist ein häufig genutztes partielles Synonym im Korpus, das (*Selbst-*)*Verpflichtung* nahe kommt, das Substantiv *Bekenntnis* (in der Form *Bekenntnis/bekennen zu X*). Dieses wird ebenso syntaktisch mit *Pflicht* verknüpft:

Nachhaltigkeit ist bei Beiersdorf seit der Unternehmensgründung mit einem klaren Bekenntnis verbunden: der Pflicht, ökonomische, ökologische und soziale Verantwortung für die Generationen von heute und morgen zu übernehmen. (BDF Imagebroschüre)

*Bekenntnis* rückt das Bedeutungsattribut ‚freiwillig‘ noch stärker in den Fokus und nutzt die religiöse Konnotation, was bereits ausgeführt wurde. ›Bekenntnisträger‹ sind dabei immer ‚Unternehmen‘. In den Belegen werden die ›Bekenntnisziele‹ ebenfalls deutlich (‚Nachhaltigkeit‘, ‚Integrität‘ oder ‚Verantwortung‘):

Unser starkes Bekenntnis zur Nachhaltigkeit war schon immer ein wichtiger Erfolgsfaktor. (Henkel GB 2010)

Die Kraft von Siemens nutzen: Hierzu gehört ein klares und unmissverständliches Bekenntnis zur Integrität. Dessen Kern und Ankerpunkt bilden unsere Werte: Verantwortungsvoll – Exzellent – Innovativ. (Siemens GB 2010)

VERPFLICHTUNG, VERSPRECHEN und BEKENNTNIS dienen somit dazu, Unternehmen motivunabhängige Beweggründe zum Handeln in Bezug auf andere Sachverhalte zu schaffen, ohne eine tatsächliche ›Verpflichtungsinstanz‹ tatsächlich zu besitzen, da diese im Unternehmen selbst liegt. Dadurch sichern sich Unternehmen jedoch die deontische Bindung an unterstellte NORMEN (WERTE, INTEGRITÄT) und andere umgebende Objekte (UMWELT und GESELLSCHAFT) zurück.

### 1.2.6 Fazit: NORMEN UND PRINZIPIEN

Die Auswertung von NORMEN und PRINZIPIEN zeigte auf, dass durch WERTE, NACHHALTIGKEIT, VERANTWORTUNG und VERPFLICHTUNG moralische Geltungsansprüche der Unterneh-

men konstruiert werden, wobei diese besonders nach außen gerichtet sind (vgl. Jacob 2011, 19f.), um sich vor externen Anspruchsgruppen und deren Wertesystem zu verantworten. Für die Unternehmen ist es daher wichtig, dass die selbst zugeschriebenen WERTE oder VERPFLICHTUNGEN (zu NACHHALTIGKEIT, VERANTWORTUNG etc.) von den Anspruchsgruppen auch als solche gesehen und (an)erkannt werden. Dennoch bedeuten diese Aussagen nicht, dass die Proklamation von WERTE, NACHHALTIGKEIT, VERANTWORTUNG und VERPFLICHTUNG auch tatsächlich Handlungen nach sich ziehen, im Sinne von tatsächlicher Haftung oder Rechenschaft. Die Absicht des Übernehmens und die Voraussetzungen für dieses Handeln (z.B. ‚Verantwortungswahrnehmung‘) stehen im Vordergrund (um sprachlich moralische Machtkonstellationen zu konstituieren), nicht die tatsächliche Übernahme oder die Folgen derer.

## 1.2.7 ERZEUGNISSE/PHYSISCHE OBJEKTE

### 1.2.7.1 PRODUKTE

In diesem Kapitel geht es um physische OBJEKTE wie PRODUKTE, INSTRUMENTE oder TECHNOLOGIEN, die in ihrer diskursiven Repräsentation einen Beitrag zur Identitätskonstruktion der Unternehmen leisten – entweder als OBJEKT selbst oder durch HERSTELLUNG bzw. DISTRIBUTION derselben. Meist wird auf diese Sachverhalte auf der lexikalischen Ebene durch *Produkte* (als *Keyword* und Hochfrequenzwort auf den vorderen Rängen) referiert:

Wir setzen in unseren Kliniken und bei der Betreuung von Heimdialyse-Patienten die unternehmenseigenen hochwertigen Produkte, Medikamente und Verfahren ein. (FMC GB 2010)

Daneben finden sich als Synonyme bzw. Hyponyme *Dienstleistung\** und *Lösung\** (oft im Kontext von *bieten*). Bei der Betrachtung von Komposita weisen Fügungen mit *Produkt\** auf die tiefe diskursive Verflechtung von PRODUKTEN bei der Konstruktion von UNTERNEHMENSIDENTITÄT hin, da sich diese vielschichtig auf ›Produktbreite‹ (*Produktportfolio*<sup>178</sup>, *Produktpalette*<sup>179</sup>, *Produktreihe*, *Produktfamilie*, *Produktvielfalt*<sup>180</sup>, *Produktangebot*<sup>181</sup>), ›Produktdisposition‹ (*Produktleistung*, *Produktqualität*, *Produkteigenschaften*<sup>182</sup>) ›Produktprozess‹ (*Produktentwicklung*<sup>183</sup>, *Produktoptimierung*<sup>184</sup>, *Produktinnovationen*, *Produktlebenszyklus*) und

<sup>178</sup> Vgl. dazu: „Dialysemedikamente tragen zur horizontalen Erweiterung unseres Produktportfolios über das Angebot von Dialyседienstleistungen und -produkten hinaus bei.“ (FMC GB 2010).

<sup>179</sup> Vgl. dazu: „Fresenius ist global präsent und bietet eine umfassende Produkt und Dienstleistungspalette.“ (Fresenius Auf einen Blick 2010).

<sup>180</sup> Vgl. dazu: „Im Bereich der Mineraldünger ist unsere Produktvielfalt unübertroffen: Für jede Bodenart und Pflanzenkultur stellen wir das passende Düngemittel her.“ (K+S GB 2010).

<sup>181</sup> Vgl. dazu: „Im Unternehmensbereich Wasch-/Reinigungsmittel umfasst unser Produktangebot Universalwaschmittel, Spezialwaschmittel und Reinigungsmittel. (Henkel GB 2010).

<sup>182</sup> Vgl. dazu: „Die umfangreiche Dokumentation der Produkteigenschaften und die Erfüllung aller rechtlichen Vorgaben nimmt für uns einen hohen Stellenwert ein.“ (Merck GB 2010).

<sup>183</sup> Vgl. dazu: „Innovative Ideen, Produktentwicklung und Therapien mit hohem Qualitätsniveau werden auch in Zukunft die Basis für weitere marktführende Produkte sein.“ (Fresenius GB 2010).



›Produktpflichten‹ (*Produktverantwortung*, *Produktsicherheit*<sup>185</sup>) beziehen. Mittels *\*produkt* als zweiter Konstituente in Komposita wird die ›Produktart‹ näher bestimmt, worüber sich Unternehmen bereits in bestimmte Branchen einordnen (›Branchenzugehörigkeit‹):

Unseren Chemie-Produkten begegnen Verbraucher praktisch täglich: Auch wenn unser Name nicht draufsteht, so steht doch Merck dahinter, wenn Lebensmittel sicher sind, wenn Autolacke glänzen oder beim Siegtreffer Ihres Lieblingsvereins. (Merck Einzigartig – Der Merck Weg)

Dialysemedikamente tragen zur vertikalen Erweiterung unseres Portfolios bei, über unser Angebot von Dialyseprodukten und -dienstleistungen hinaus. (Fresenius GB 2010)

Ebenso zu ›Produktart‹ gehören die vielfältigen Bewertungen (›hochwertig‹):

Die Produkte der MAN Gruppe sind Spitzenprodukte und als solche Garant für den Erfolg der MAN-Marken. (MAN GB 2010)

Auch *\*lösungen* (508x) wird als zweite Konstituente in Komposita verwendet und spezifiziert die ›Produktart‹:

LOGISTIKLÖSUNGEN, DIE GRENZEN ÜBERWINDEN. Als international führendes Logistikunternehmen vereinfacht dhl komplexe Abläufe und erleichtert so das Leben der Kunden. (Deutsche Post GB 2010)

Mit den innovativen Halbleiterlösungen von Infineon kommt der Strom mit geringen Verlusten aus der Steckdose. (Infineon Wer wir sind)

Die Belege zeigen an, dass *\*lösungen* bevorzugt von Unternehmen aus dem (medizin-) technischen bzw. technologischen Bereich genutzt wird, was auch für die Ausdrücke *\*technologie* und *\*dienstleistungen* gilt:

Labordienstleistungen ergänzen das Dienstleistungsportfolio von Fresenius Medical Care. Nierenfachärzte sind auf umfangreiche Labortests angewiesen, um die Dialysetherapie auf jeden Patienten individuell abstimmen zu können. Die Qualität der Testergebnisse trägt wesentlich zur Behandlungs- und damit zur Lebensqualität der Patienten bei. (FMC GB 2010)<sup>186</sup>

Beleuchtet man im nächsten Schritt die syntagmatische Ebene, rufen Muster wie *x* (Adjektiv) + *Produkte\** ebenso die Konzepte ›Produktart‹ bzw. ›Produktdisposition‹ auf. Neben dem Attribut ›besitzanzeigend‹ (*unsere Produkte*) überwiegt dabei ›neu‹ (*neu\**):

Wir sehen es als eine zentrale Verpflichtung an, dass von unseren Produkten bei sachgerechter Nutzung keine Gefahr ausgeht. Bereits bei der Entwicklung von neuen Produkten legen wir Wert auf Nachhaltigkeitsaspekte für deren gesamten Lebenszyklus. (Merck GB 2010)

Zusätzlich wird präsupponiert, dass ›neue‹ PRODUKTE immer auch ›besser‹ (*verbesser\**) sind:

Damit wird sowohl der Führungsanspruch auf den Geschäftsfeldern von Henkel hervorgehoben als auch der Unternehmenszweck beschrieben, immer wieder neue Produkte und innovative Lösungen zu entwickeln, die für Verbraucher und Industriekunden wesentliche Erleichterungen und Verbesserungen bedeuten. (Henkel Corporate Identity)

Des Weiteren wird das Attribut ›neu‹ auch über das Adjektiv *innovativ\** versprachlicht (→ 9.2.9.2). Ebenfalls in diesen Belegen erfolgt die Präsupposition ›neue/innovative Produkte

---

<sup>184</sup> Vgl. dazu: „Die ständige Produktoptimierung auf Basis von Effizienz und Funktionalität hat sich für uns bewährt – und bleibt auch weiterhin unser Prinzip.“ (Lufthansa GB 2010).

<sup>185</sup> Vgl. dazu: „Die Produktsicherheit ist Grundlage unserer umfassenden Produktverantwortung.“ (BMW Verhaltenskodex).

<sup>186</sup> Vgl. dazu: „Halbleiter-Technologie von Infineon trimmt Autos, Industrieanlagen, Unterhaltungs- und Haushaltselektronik auf geringeren Energieverbrauch.“ (Infineon Wer wir sind).



sind automatisch besser< im Kontext von *Selbstverständnis*:

Unser Beitrag als führendes Unternehmen liegt in der Entwicklung von innovativen Produkten und Prozessen, die bei gleicher oder besserer Leistung immer weniger Ressourcen verbrauchen. Daher gehört zu unserem Selbstverständnis auch der Anspruch, dass alle neuen Produkte in mindestens einem der fünf definierten Fokusfelder einen Beitrag zur nachhaltigen Entwicklung leisten. (Henkel GB 2010)

Weitere regelhaft gebrauchte Adjektive im Kontext von *Produkte\** sind *zukunftsweisend\** und *modern\**<sup>187</sup>. PRODUKTE werden darüber hinaus auch häufig durch Adjektive in ihrer ‚Branchenzugehörigkeit‘ kategorisiert, wobei es dabei sprachlich meist um *pharmazeutische\**, *medizinische\**<sup>188</sup> oder *chemische\**<sup>189</sup> + *Produkte\** geht. Diskurstypisch erfolgen auch Eigenschaftszuweisungen in Bezug auf die ‚qualitative Funktion‘ der PRODUKTE:

Unseren Kunden bieten wir effiziente und umweltverträgliche Produkte, Technologien und Dienstleistungen mit verbraucherrelevantem Nutzen an. (Henkel GB 2010)

Vor allem die Zufügung von *umweltverträglich\*/umweltschonend\** (als ‚qualitative Funktion‘) ist in den aufgefundenen Belegen dominant und wird durch die Metaphern *saubere\*/grüne\* Produkte/Lösungen* aufgenommen:

Mit einer Kultur, die höchsten ethischen Ansprüchen genügt, wollen wir Maßstäbe setzen: Genauso wichtig wie saubere und sichere Produkte sind uns saubere und rechtssichere Geschäfte. (Daimler Das Unternehmen 2011)

Bezüge auf die ‚ökonomische Funktion‘ der PRODUKTE finden sich naturgemäß ebenfalls:

Wir sind davon überzeugt, dass ein Schlüsselement unseres Erfolgs die Fähigkeit ist, ein umfassendes Portfolio an technologischen Ressourcen und wettbewerbsfähigen Leistungen anzubieten, um unsere Kunden dabei zu unterstützen, innovative und wettbewerbsfähige Produkte bereitzustellen. (Infineon GB 2010)

Weitere Adjektivattribute (z.B. *zahlreich\**) weisen wiederum auf das Konzept ›Produktbreite‹ hin. Die Adjektive *hochwertig\**, *attraktiv\**, *herausragend\*/hervorragend\**<sup>190</sup> und *faszinierend\** markieren die ›Produktdisposition‹ und bewerten demgemäß den Sachverhalt PRODUKTE, was durch evaluierende Adjektive wie *gut\**, *besser\** und *beste\** aufgenommen wird:

Attraktiv und komfortabel, aber auch wirtschaftlich und funktional – ein gutes Produkt muss viel leisten und unseren traditionell hohen Qualitätsansprüchen genügen. (Lufthansa GB 2010)

Ein Anspruch auf Alleinstellung kommt durch die Adjektive *einzigartig\** und *individuell\** zum Ausdruck:

Gottlieb Daimlers Leitspruch „Das Beste oder nichts“ spiegelt sich in unserer einzigartigen Produktpalette wider. (Daimler Das Unternehmen 2011)<sup>191</sup>

---

<sup>187</sup> Vgl. dazu: „Der gezielte Ausbau des internationalen Geschäfts mit zukunftsweisenden Produkten und Dienstleistungen steht dabei im Mittelpunkt.“ (Linde GB 2010).

<sup>188</sup> Vgl. dazu: „Wir wollen medizinische Produkte in höchster Qualität und zugleich zum besten Preis liefern.“ (FMC GB 2010).

<sup>189</sup> Vgl. dazu: „Seit Friedrich Jacob Merck im Jahr 1668 den Grundstein legte, steht der Name Merck für Arzneimittel und chemische Produkte, die für das Leben von Menschen und für das Unternehmen unschätzbare Werte geschaffen haben.“ (Merck Einzigartig – Der Merck Weg).

<sup>190</sup> Vgl. dazu: „Die außergewöhnliche dermatologische Kompetenz und die Forschungsqualität unseres Unternehmens spiegeln sich nicht nur in unseren herausragenden Produkten wider.“ (BDF Imagebroschüre).

<sup>191</sup> Vgl. dazu auch: „Als Unternehmen mit Anspruch auf Spitzenleistung bieten wir Lösungen für die automobilen Anforderungen von heute und morgen – mit unserem einzigartigen Produktmix, bahnbrechenden

Bezieht man sich wiederum auf das Substantiv *Lösungen*, fallen die Attributionen durch das Adjektiv *intelligent\** auf, das eine Anthropomorphisierung einleitet:<sup>192</sup>

Die vier Buchstaben „BASF“ stehen für unsere Tradition und unsere Stärken, die beiden Quadrate für Partnerschaft und intelligente Lösungen. (BASF GB 2010)

E.ON distanziert sich von dieser einfachen metaphorischen Übertragung graphisch durch Anführungszeichen:

Im Hochspannungsnetz sind bei E.ON schon heute viele solcher „intelligenten“ Lösungen im Einsatz. (E.ON Cleaner and better energy)

Das Attribut ‚neu‘, das bereits in Zusammenhang mit *Produkte\** angeführt wurde, bestätigen die Syntagmen *innovative\* Lösungen* und *zukunftsweisende\* Lösungen*, wobei Letzteres als Kollokation genutzt wird:<sup>193</sup>

Zukunftsweisende Lösungen der Informations- und Kommunikationstechnologie bringen uns unserem Ziel, dem vernetzten Arbeiten in Wirtschaft und Gesellschaft, näher. (Telekom GB 2010)

Die Ausdrücke *\*technologie* (477x) und *Dienstleistung\** werden kaum adjektivisch spezifiziert (außer bei RWE und FRESSENIUS MEDICAL CARE).<sup>194</sup> Auffallend ist in diesem Zusammenhang jedoch, dass das Attribut ‚langfristig‘ mittels *nachhaltige\* + Technologien* – im Gegensatz zu den bisherigen Beispielen (*Produkte, Lösungen*) – vermehrt eingesetzt wird:

Vor allem die wachsenden Megacities brauchen nachhaltige Technologien für die individuelle Mobilität. (Infineon Wer wir sind)

Die Auswertung der adjektivischen Attributionen der Lexeme *Produkte\**, *Lösung\** und *Technologie\** zeigt damit, dass Unternehmen ihre PRODUKTE vielfach klassifizieren und bewerten wollen. Mit der Klassifikation verbunden, werden dadurch diskursive Tiefenstrukturen der Differenzierung (z.B. ‚individuell‘, ‚langfristig‘) offengelegt, die auf UNTERNEHMENSIDENTITÄT einwirken. Auf syntagmatischer Ebene fallen ferner substantivische Akkumulationen auf (durch wahlweise *Produkte\**, *Technologie\**, *Dienstleistung\**, *Service\**, *Leistungen\**, *Verfahren\**, *Prozesse\**). Diese werden auf der Sprachoberfläche meist durch die einfache kopulative Konjunktion *und* strukturell in zweifacher Reihung verknüpft:

Fresenius Medical Care steht für einzigartige Kompetenz bei Produkten und Dienstleistungen für Patienten mit chronischem Nierenversagen. (FMC GB 2010)

Auch dreifache Reihungen sind vielfach beobachtbar:

---

Technologien und maßgeschneiderten Services.“ (Daimler Das Unternehmen 2011); „Strom ist ein ganz besonderes Produkt. (RWE GB 2010).

<sup>192</sup> Ebenfalls häufig versprachlicht ist ‚individuell‘ (*maßgeschneidert\**, *individuell\**) + *\*lösungen*: „Mit ihrem Portfolio bietet Lufthansa Systems maßgeschneiderte Lösungen für ihre Kunden an.“ (Lufthansa GB 2010).

<sup>193</sup> Gleichfalls finden sich Bezüge auf die ‚qualitative Funktion‘ und ‚ökonomische Funktion‘ von LÖSUNG: „Kaum ein Unternehmen kann es mit unserem Angebot an Produkten und Dienstleistungen, unserem Know-how und unseren wertschöpfenden Lösungen aufnehmen.“ (Siemens GB 2010). Auch Sachverhaltsbewertungen häuften sich (z.B. *exzellente Lösungen*) dabei.

<sup>194</sup> Vgl. dazu: „Seit 2008 bieten wir unseren Geschäftskunden einen Katalog maßgeschneiderter Energiedienstleistungen an.“ (RWE GB 2010).

Wir bieten Produkte, Technologien und Prozesse, die höchste Standards erfüllen. (Henkel Vision und Werte)

DAIMLER unterstreicht die triadische Relation auch graphisch durch *Bulletpoints*:

Daimler hat das Automobil erfunden – jetzt schreibt das Unternehmen das nächste Kapitel seiner Erfolgsgeschichte:

- mit Produkten, deren Qualität Maßstäbe setzt,
- mit Technologien, die Leidenschaft, Sicherheit und Umweltfreundlichkeit unter einen Hut bringen,
- und mit Serviceleistungen, die unseren Kunden größtmöglichen Nutzen bieten. (Daimler hat das Automobil erfunden)

Die Akkumulationen offenbaren, dass Unternehmen diese formale Struktur, angereichert mit den Ausdrücken *Produkte\**, *Technologie\**, *Dienstleistung\**, *Service\**, *Leistungen\**, *Verfahren\** und *Prozesse\** lediglich als assertive Bekundung von ›Produkt- bzw. Leistungsbesitz‹ nutzen, die eigentliche ›Produktdisposition‹ dabei aber nicht weiter ausführen. Im Vordergrund steht die Tatsache, dass Unternehmen PRODUKTE anbieten (mittels der Verben *bieten*, *herstellen* oder *verfügen über*). Laut Schuster (2000, 602) wirkt dieses Vorgehen jedoch nicht illustrierend oder verständnisfördernd, was diese Analyse bestätigt. Eine ähnliche Funktion kommt auch den Präpositionalattributen *mit (x) Produkte\** zu, die PRODUKTE als INSTRUMENTE konstruieren, mit welchen ein höheres Ziel bzw. ein höherer Nutzen erreicht werden soll:

Mit unseren Produkten und Dienstleistungen wecken wir Emotionen – auch in der Werbung. Dabei beachten wir stets die geltenden des Verbraucherschutz- und Wettbewerbsrechts an Transparenz und Richtigkeit. (BMW Verhaltenskodex)

Wie der Beleg von BMW zeigt, werden PRODUKTE nicht in Bezug auf ihren technisch-funktionalen Grundnutzen, sondern einen komplementären Zusatznutzen (psychologisch-sozialen Nutzen) hin beschrieben (›Produktnutzen‹<sup>195</sup>): in diesem Fall ‚Emotion‘. In den untersuchten Repräsentationstexten sind – neben ‚Emotion‘ – als ›Produktnutzen‹ die Attribute ‚Lebensqualität‘, ‚Problemlösung‘, ‚Mobilität‘, ‚Erfolg‘ und ‚Wachstum‘ aufzufinden. Besonders viele Kovorkommen von *Produkt\*/Technologie\*/Lösung\** mit dem Ausdruck *Leben\** (‚Lebensqualität‘) suggerieren eine ganzheitliche Einflussnahme des PRODUKTES (und damit des gesamten UNTERNEHMENS) auf die Lebenswelt der Anspruchsgruppen. Sie setzen das Konzeptattribut ‚Lebensqualität‘ dominant:

Dank unserer innovativen Technologien und Behandlungskonzepte können nierenkranke Patienten heute mit deutlich mehr Zuversicht nach vorne schauen. Wir geben ihnen eine Zukunft mit höchstmöglicher Lebensqualität. (FMC GB 2010)

Natürlich ist im medizinischen Bereich eine hohe Beleganzahl und ein stark medizinisch bzw. physiologisch geprägtes Verständnis von ‚Lebensqualität‘ zu erwarten, was FRESenius MEDI-

---

<sup>195</sup> Die Bedeutung von PRODUKTE wird vor allem aus dem Bedürfnis der Anspruchsgruppen heraus konstruiert, d.h. diese sollen einen konkreten Nutzen durch es erkennen. Dieser Produktnutzen ist in allen Problemlösungsbeiträgen zu sehen, die Kunden durch das Produkt entstehen (Gebrauchs-/Funktionstüchtigkeit, Funktions- und Betriebssicherheit, Wertbeständigkeit, Haltbarkeit). Der Zusatznutzen deckt „ästhetische und bedeutungsvermittelnde Aufgaben“ (Schmid/Lyczek 2008, 46) und ist bei den Automobilisten auffallend häufig.

CAL CARE präsentiert. Dennoch stellen auch MERCK und BAYER in ihren Unternehmensbereichen MEDIKAMENTE her und haben Kontakte zu Patienten. Deren Formulierungen weichen, im Sinne eines umfassenderen Verständnisses von ‚Lebensqualität‘, von den Aussagen bei FRESENIUS MEDICAL CARE ab:

Mit unseren Produkten und Dienstleistungen möchten wir den Menschen nützen und zur Verbesserung der Lebensqualität beitragen. (Bayer Leitbild)

Unsere Vision ist ganz einfach und klar: Wir sichern unseren nachhaltigen Erfolg durch innovative Produkte und Lösungen, die helfen, die Lebensqualität auf dieser Erde zu verbessern. (Merck Einzigartig – Der Merck Weg)

Diese Belege zeigen besonders durch die Lexeme *Menschen* und *Erde* einen generischen Anspruch bezüglich der Bedeutung von ‚Lebensqualität‘, die sich nicht nur auf PATIENTEN, sondern alle MENSCHEN bezieht. Auch andere Unternehmen, die nur indirekt Gesundheitsleistungen bieten (wie SIEMENS oder K+S), verwenden Aussagen mit dem hohen Absolutheitsanspruch, durch ihre PRODUKTE die *Lebensqualität* zu *verbessern*:

Es sind Systeme von Siemens, die die Lebensqualität vieler Menschen weltweit verbessern; [...]. (Siemens GB 2010)

Wir fördern und veredeln hochwertige mineralische Rohstoffe und wollen mit unseren Produkten und Leistungen Ernährung, Gesundheit sowie Lebensqualität verbessern. (K+S GB 2010)

Diese Produktetikettierung scheint so verfestigt, dass sich auch Unternehmen aus anderen Sektoren daran anlehnen, wie etwa SAP durch *Lebensqualität* [...] *erhöhen*:

Unsere Vision ist es, die Abläufe in der weltweiten Wirtschaft zu verbessern und die Lebensqualität von Menschen zu erhöhen. (SAP GB 2010)

*Erhöhen* präsupponiert dabei auch, dass die LEBENSQUALITÄT bereits ‚hoch‘ ist; die musterhaften Syntagmen *besseres Leben/better life*<sup>196</sup> oder *mehr Lebensqualität*, die wiederum von MERCK und BAYER genutzt werden (→ 9.2.2.5), lehnen sich an diese Bedeutung an. Dagegen variiert HENKEL das Muster lexikalisch:

Henkel ist führend mit Marken und Technologien, die das Leben der Menschen leichter, besser und schöner machen. (Henkel Corporate Identity)

Als zweiter Typ von ›Produktnutzen‹ kristallisiert sich die ‚Problemlösung‘ heraus, was besonders SIEMENS, BASF und INFINEON dominant setzen. Lexikalisch wird dieses Attribut realisiert durch *Lösung\**, *Antwort\**, *Beitrag\**, *Bewältigung\**, *Herausforderung\**, *helfen* und *bewältigen*, denn diese Ausdrücke präsupponieren Defizitzustände potentieller Anspruchsgruppen, für welche Unternehmen Erfüllungszustände (= ihre spezifischen PRODUKTE) anbieten (vgl. Schmid/Lyczek 2008, 59):

Mit nachhaltigen und innovativen Produkten, Technologien und Services tragen wir dazu bei, Antworten auf globale Herausforderungen zu finden. (BASF GB 2010)

INFINEON formuliert dabei besonders pathetisch, indem die Aussage *Infineons verantwor-*

---

<sup>196</sup> Vgl. dazu: „Science for a better life“ (Bayer Leitbild).

*tungsbewusste und radikale Reaktion* proklamiert wird:

Wir entwickeln, produzieren und vermarkten eine Vielzahl an Halbleitern und bieten komplette Systemlösungen an, welche helfen, drei zentrale Herausforderungen unserer Gesellschaft nachhaltig zu bewältigen: Energieeffizienz, Mobilität und Sicherheit. Das spiegelt Infineons verantwortungsbewusste und radikale Reaktion auf die weltweiten Veränderungen wie Globalisierung, Klimaveränderungen und Bevölkerungswachstum wider. (Infineon Wer wir sind)

Wie in diesem Beleg geht ‚Problemlösung‘ vielmals mit *Klima\** (auch *Klimaschutz*) einher und referiert auf konkrete HERAUSFORDERUNGEN (→ 9.2.12.2), denen Unternehmen mit ihren PRODUKTEN begegnen wollen. Zuletzt wird das Konzept ›Produktnutzen‹ auch metareflektierend thematisiert (*Nutzen, Nutzwert, Mehrwert*):

Mit ihrem Portfolio bietet Lufthansa Systems maßgeschneiderte Lösungen für ihre Kunden an. Ihre Produkte und Beratungsleistungen liefern einen besonderen Mehrwert, indem sie dazu beitragen, die Effizienz zu steigern, Kosten zu senken oder zusätzliche Erlöse zu generieren. (Lufthansa GB 2010)

Des Weiteren gebrauchen Unternehmen beim Sachverhalt PRODUKTE konkrete ›Produktbeispiele‹, indem mittels Hyponymen zu *Produkte\**, *Technologie\**, *Dienstleistung\** etc. gearbeitet wird. Mit Reins (2006, 126ff.) könnte man dieses Vorgehen als verbale *Reframing*-Technik des *Chunking Down* ansehen, durch welche die Situationskomplexität heruntergebrochen und das UNTERNEHMEN durch konkrete PRODUKTE materialisiert wird. Dabei lassen sich innerhalb des Konzeptes ›Produktbeispiele‹ zwei Ebenen auffinden: ‚Produktbereich‘ (abstraktere Produktbezeichnungen mittels Branchennamen oder übergeordneten Produktgattungen) sowie ‚Produktspezifika‘ (konkrete Produktnamen, Stoffnamen, Eigennamen). MERCK bezieht sich im folgenden Beispiel auf beide Gebiete (‚Produktbereich‘ sowie ‚Produktspezifika‘) und integriert das Prinzip des *Chunking Down* vom Abstraktum zum Spezifikum ebenfalls metareflektierend durch die Wörter *abstrakt* und *konkret*:

DER BEGRIFF „PHARMA“ KLINGT FÜR DIE MEISTEN MENSCHEN ZIEMLICH ABSTRAKT. BIS MAN PLÖTZLICH KRANK WIRD – DANN WIRD ER ÜBERRASCHEND SCHNELL KONKRET. Unser Unternehmensbereich Pharma: Gesundheit und Lebensqualität. Dafür hat Merck in seiner langen Geschichte schon immer wichtige und wegweisende Beiträge geliefert. Die Erforschung und Entwicklung neuer Arzneimittel hat bei uns lange Tradition. Dieses gilt für verschreibungspflichtige Originalpräparate wie Erbitux®, Rebif® oder Concor® ebenso wie für hochwertige Produkte, die der Gesundheitsvorsorge oder Selbstmedikation dienen. [...] Nasivin® ist eine unserer bekanntesten Marken auf diesem Gebiet. (Merck Einzigartig – Der Merck Weg)

Der ‚Produktbereich‘ (*Pharma, Unternehmensbereich, Arzneimittel*) steigt dabei linear zu den ‚Produktspezifika‘ (*Originalpräparate wie Erbitux®, Rebif® oder Concor®, Nasivin®*) ab, wobei der Rezipient durch die Dichotomie *abstrakt – konkret* strukturell durch die Aussage geführt wird. Die mit dem Symbol ® versehenen Eigennamen referieren dabei auf eine eingetragene MARKE (→ 9.2.7.2) im Markenregister und sind rechtlich geschützt – gleichzeitig sind sie symbolische Autoritäts- und Identitätssymbole. Produkt- und Markennamen sind die produktivsten Bereiche innerhalb der wirtschaftsbezogenen Lexik (vgl. Hundt 2002, 938), wobei MERCK das sprachlich präsentierte Produktportfolio als eigenes semantisches Feld die-



nen kann. Ebenso finden sich bei MERCK implizite Bezugnahmen auf WETTBEWERBER (*einziges Unternehmen*) zur Aufwertung des eigenen UNTERNEHMENS:

Als einziges Unternehmen bieten wir Ärzten und Patienten rekombinante Versionen der drei für die Behandlung der Unfruchtbarkeit wichtigsten Sexualhormone an. (Merck GB 2010)

Weitere Verweise auf den ‚Produktbereich‘ PHARMA/CHEMIE<sup>197</sup> bieten auch BAYER, FRESENIUS MEDICAL CARE und FRESENIUS (seltener BASF), wobei MERCK mit Beispielen dominiert. Im ‚Produktbereich‘ BANKING werden viele Aussagen getätigt, wohingegen ‚Produktspezifika‘ wenig versprachlicht werden, d.h. die hier operierenden Unternehmen halten sich sprachlich eher abstrakt. Nur die DEUTSCHE BÖRSE wird bei der Präsentation ihres PRODUKTPORTFOLIOS mit vielen Produktbezeichnungen spezifisch und erklärt dieses anhand einer einleitenden Frage (*Was wird gehandelt?*) anschaulich:

Was wird gehandelt? An der Börse Frankfurt sind die Aktien von mehr als 10.000 nationalen und internationalen Unternehmen notiert. Mittlerweile sind außerdem über 700 börsengehandelte Indexfonds (ETFs) auf Xetra® handelbar sowie Exchange Traded Commodities (ETCs) und Exchange Traded Notes (ETNs), 25.000 festverzinsliche Wertpapiere wie Anleihen, Pfandbriefe und Obligationen, knapp 3.000 Investmentfonds und mehr als 400.000 Zertifikate und Optionsscheine, die sog. Strukturierten Produkte. (Deutsche Börse Vom Parkett zum elektronischen Handelsplatz)

Diese hohe Produktivität in der Lexik ist für Banken und Börsen (sowie Finanzdienstleister) laut Hundt (2002, 934) typisch. Im ‚Produktbereich‘ AUTOMOTIVE zeigen sich ebenso diverse Belege für ‚Produktbereich‘:

Die Fahrzeuge der BMW Group setzen höchste Standards hinsichtlich Ästhetik, Dynamik, Technik und Qualität und belegen damit die Technologie- und Innovationsführerschaft des Unternehmens. (BMW GB 2010/Konzertrötrat)

MAN legt mit den Produkten Nutzfahrzeuge, Turbomaschinen, Dieselmotoren und Getriebe den Schwerpunkt auf Marktsegmente mit nachhaltigen globalen Wachstumschancen in den Geschäftsfeldern Commercial Vehicles und Power Engineering. (MAN GB 2010)

In den Beispielen der Automobilisten finden sich darüber proleptische Exemplifikationen, die auf den ‚Produktbereich‘ bezogen sind (*von/vom...bis zu*):

Die Angebotspalette des Unternehmens reicht vom CO<sub>2</sub>-Champion smart bis zu wirtschaftlichen Schwer-Lkw und Bussen. (Daimler Daimler hat das Automobil erfunden)<sup>198</sup>

Für ‚Produktspezifika‘ (AUTOMODELLE, MOTOREN, ANTRIEBE) finden sich bei den Automobilisten diverse Referenzen auf PRODUKTE, die meist vom UNTERNEHMEN abgekoppelt werden

---

<sup>197</sup> Vgl. zu ‚Produktbereich‘ PHARMA/CHEMIE: „Fresenius Medical Care ist der weltweit führende Anbieter von Produkten und Dienstleistungen, die bei einer Dialyse benötigt werden.“ (FMC GB 2010); Vgl. zu ‚Produktspezifika‘ PHARMA/CHEMIE: „Bayer MaterialScience ist ein führender Hersteller von hochwertigen Werkstoffen, z.B. Polycarbonat und Polyurethan, sowie innovativen Systemlösungen, die in zahlreichen Produkten des täglichen Lebens Anwendung finden.“ (Bayer Namen.Zahlen.Fakten 2010/2011); „Üblicherweise werden bei der Behandlung von Dialysepatienten Medikamente eingesetzt, die zur Korrektur der Blutarmut sowie zur Regulierung des Mineralhaushalts benötigt werden. Das Spektrum umfasst blutbildende Substanzen, [...] Eisenpräparate, Phosphatbinder, Vitamin-a-Präparate und sogenannte Kalzimimetika, [...]“. (FMC GB 2010).

<sup>198</sup> Vgl. dazu auch: „Dabei reicht das Angebot von verbrauchsoptimalen Kleinwagen bis hin zu Fahrzeugen der Luxusklasse. Im Bereich der Nutzfahrzeuge beginnt das Angebot bei Pick-up-Fahrzeugen und reicht bis zu Bussen und schweren Lastkraftwagen.“ (VW Zahlen.Daten.Fakten).



und separat als PRODUKTE bzw. MARKE auftreten (*Mercedes, Audi* etc.):

Weltweit fasziniert der neu aufgelegte Mercedes-Benz CLS in besonderem Design: mit kultivierter Sportlichkeit und Effizienz auf höchstem Niveau. (Daimler GB 2010)

In Rückbezug zum UNTERNEHMEN werden insgesamt eher wenige Beispiele ersichtlich:

Immer wieder hat die BMW Group neue Fahrzeugkonzepte wie den BMW 5er zu Modellfamilien mit einer Vielzahl populärer Varianten diversifiziert. (BMW GB 2010/Strategie)

Die Fokussierung auf PRODUKTE bzw. MARKE der Automobilisten liegt sicherlich auch daran, dass AUTOS stark symbolisch-emotional<sup>199</sup> aufgeladen sowie anthropomorphisiert werden (>Produkt ist ein Lebewesen<sup>200</sup>). Im folgenden Beispiel von BMW finden sich diverse Anthropomorphisierungen (z.B. *Modellfamilie, erste Generation des BMW 5er*), erweitert um Metonymien (z.B. *Ausnahmefahrzeug, Modellfamilie* etc.):

Wie ein Ausnahmefahrzeug zur populären Modellfamilie wuchs – Der Anfang einer weltumspannenden Erfolgsstory. Mit der Vorstellung der Modelle BMW 520 und BMW 520i auf der Internationalen Automobil-Ausstellung (IAA) des Jahres 1972 begann eine neue Ära in der oberen Mittelklasse. Die Nachfolger der sogenannten „Neuen Klasse“ von BMW avancierten binnen kurzer Zeit zu Synonymen für die ausgewogene Balance zwischen Sportlichkeit und Eleganz in ihrem Segment. (BMW GB 2010/Strategie)

Der ‚Produktbereich‘ (TELE-)KOMMUNIKATION findet sich eher sporadisch versprachlicht, wobei TELEKOM das *Chunking Down*-Prinzip durchaus nutzt (mittels *beispielsweise*):

Mit neuen innovativen Diensten und Tarifen können wir uns besser gegenüber den Wettbewerbern differenzieren. Beispielsweise haben unsere Kunden bereits heute über das Mediencenter jederzeit Zugriff auf ihre Musik, ihre Bilder und andere Medieninhalte – egal, ob am PC, am Fernseher oder dem Smartphone. (Telekom GB 2010)

DEUTSCHE POST geht detailliert auf ‚Produktspezifika‘ ein, z.B. durch den *E-Postbrief*:

Im Juli 2010 haben wir unser Angebot für eine sichere, vertrauliche und verlässliche elektronische Kommunikation auf den Markt gebracht: den E-Postbrief. (Deutsche Post GB 2010)

Thematisch schließt sich daran auch der ‚Produktbereich‘ TECHNIK an:

Wir richten unsere Aktivitäten konsequent an unseren Kernkompetenzen aus. Dazu gehören das Management von Flugnetzen, Partnerschaften und operativen Abläufen am Boden und in der Luft sowie die Bereitstellung und Pflege von Infrastruktur und Produktionsfaktoren. (Lufthansa Leitlinien)

Auffallend ist bei INFINEON in den folgenden Belegen die direkte Kopplung von PRODUKT an

---

<sup>199</sup> Ebenfalls wird das AUTO zum eigenen Symbol: „Das Auto – Symbol des Aufstiegs. Das dynamische Zusammenspiel von Technik, Design und Fahrspaß trifft den Nerv der jungen Elite Chinas.“ (VW GB 2010).

<sup>200</sup> Im Marketing ist es durchaus bekannt und gängig, PRODUKTE (und MARKEN) analog zu (menschlichen) LEBEWESEN zu konstruieren, was bereits sprachlich durch (*Produkt-*)*Lebenszyklus/Lebensdauer, Produkt-familie-generation* geschieht. VW und DAIMLER arbeiten darüber hinaus auch metonymisch mit der *Embodiment*-Strategie: Das PRODUKT wird dabei zum KÖRPERTEIL: „In der Hirnforschung werden Autos oder technische Geräte heute als Teil unserer selbst, als Teil unseres Körpers betrachtet. Die Wissenschaft spricht von „Embodiment“. Der Mensch lenkt also sein Auto, als wäre es ein Teil seines Körpers.“ (VW GB 2010); „Seit 125 Jahren verkörpert das Automobil Faszination, Freiheit und Fahrspaß.“ (Daimler Das Unternehmen 2011). Einzelne KÖRPERTEILE werden dabei auch durch *Silhouette, Figur* oder *Herz\** aufgerufen. Neben den physischen Attributen werden auch SINNESORGANE und WAHRNEHMUNGEN erschaffen: „Mit Assistenzsystemen verleiht Daimler dem Fahrzeug „Sinne“. Sie handeln „reflexartig“ und „intelligent“ und machen so das Fahrzeug zum mitdenkenden Partner.“ (Daimler Das Unternehmen 2011). Die Attribuierung von ‚intelligent‘ geht jedoch über die Automobilisten hinaus und wird auch von E.ON redundant genutzt (*intelligente Speicher/Netze, Smart Grids/Homes*). Jedoch werden nicht nur Substantiv- und Adjektivmetaphern verwendet, sondern das PRODUKT auch mittels Tätigkeitsverben als Agens dargestellt. Neben diesen Anthropomorphisierungen finden sich auch Theriomorphisierungen (*Schnurren, Pferdestärken, Lastesel* etc.). Vgl. dazu Kapitel → 8.4.3.3.

das UNTERNEHMEN (*X von Infineon*), wodurch ein klares Besitzverhältnis hergestellt wird, bzw. die IDENTITÄT stark über das PRODUKT ausgearbeitet wird (wie bei den Automobilisten):

Von der Solarzelle über das Stromnetz bis zur Waschmaschine – Leistungshalbleiter, Mikrocontroller und Sensoren von Infineon optimieren die gesamte Energiekette. (Infineon Wer wir sind)

Das Attribut ‚Produktspezifika‘ TECHNIK wird ebenfalls markant von INFINEON eingesetzt, indem jedes einzelne PRODUKT ikonisch abgebildet wird:

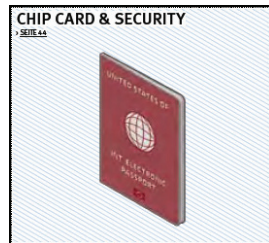

Abbildung 94 - Infineon GB 2010

Im ‚Produktbereich‘ ENERGIE sind die Aussagen von E.ON und RWE ausschlaggebend:

E.ON verfügt über Spitzen-Know-how beim Bau und Betrieb von sowohl konventionellen, d.h. fossilen und nuklearen, als auch erneuerbaren Erzeugungsanlagen. (E.ON Cleaner and better energy)

Menschen brauchen Energie. Und sie wollen, dass diese Energie sicher, sauber und bezahlbar ist. Das ist unsere Kernaufgabe – und dafür brauchen wir die Akzeptanz der Gesellschaft. (RWE GB 2010)

Auffallend ist die Präsupposition im letzten Beleg, in dem RWE *Akzeptanz* erbittet, was als Hauptfunktion in vielen Texten von RWE ausgedrückt wird (→ 9.2.8.3). E.ON dagegen geht insgesamt stärker auf ‚Produktspezifika‘ sprachlich und bildlich ein:

Strom wird auch weitere Anwendungen erschließen, zum Beispiel im Bereich Mobilität – wenn wir ihn klimafreundlich herstellen. Dazu werden wir bei E.ON die Erneuerbaren Energien in einem System mit intelligenten Speichern und Netzen weiter ausbauen. Schon jetzt zählen wir zu den weltweit größten Anbietern von Strom aus Erneuerbaren Energien. 2010 haben wir vier große On- und Offshore-Windparks in Betrieb genommen und haben damit jetzt Kapazitäten von 3,6 GW aus Wind, Sonne und Biomasse am Netz. Mit unseren Fotovoltaik- und solarthermischen Kraftwerken in Südeuropa bringen wir jetzt auch Solarstrom auf das technologische und kommerzielle Niveau der Windkraft. Zugleich aber sorgen wir mit dem Bau neuer hocheffizienter Kohle-, Gas-, Pumpspeicher- und Laufwasserkraftwerke für Stabilität und Versorgungssicherheit. (E.ON Cleaner and better energy)

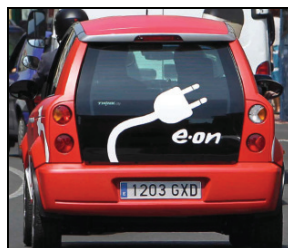

Abbildung 95 - E.ON Cleaner and better energy

Mit ROHSTOFFEN beschäftigt sich der ‚Produktbereich‘ ROH-/BAUSTOFFE, den K+S aussagenhaft dominiert:

Seit 150 Jahren fördern und veredeln wir Rohstoffe – unsere Wertschöpfungstiefe ist enorm. Auch zukünftig soll der Rohstoff- und rohstoffnahe Bereich die Basis unseres Wachstums sein. Dieses haben wir als unsere Vision formuliert. (K+S Vision und Werte)

Für das Attribut ‚Produktspezifika‘ ROH-/BAUSTOFFE finden sich jedoch auch bei HEIDELBERGCEMENT diverse Aussagen:

In diesen reifen Märkten stellen wir als voll integriertes Baustoffunternehmen Zement, Zuschlagstoffe, Asphalt, Transportbeton und verschiedene Bauprodukte her. (HeidelbergCement GB 2010)

Im kommenden Beleg werden ‚Produktspezifika‘ mittels der Ausdrücke *Sand, Kies und Hartgestein* direkt an die Unternehmensposition (*Nr. 1*) von HEIDELBERGCEMENT geknüpft:<sup>201</sup>

Wir sind die Nr. 1 weltweit bei Sand, Kies und Hartgestein. (HeidelbergCement GB 2010)

Auch K+S liefert eine hohe Beleganzahl zu ‚Produktspezifika‘, wobei *\*salze* am häufigsten sprachlich sowie bildlich (*/Salze/*) aufgeführt wird:

Wir bauen in unseren Bergwerken in 500 bis 1.400 Meter Tiefe Kali- und Steinsalze ab, die wir aufbereiten, veredeln und weltweit vermarkten – unsere Wertschöpfungstiefe ist enorm. (K+S GB 2010)

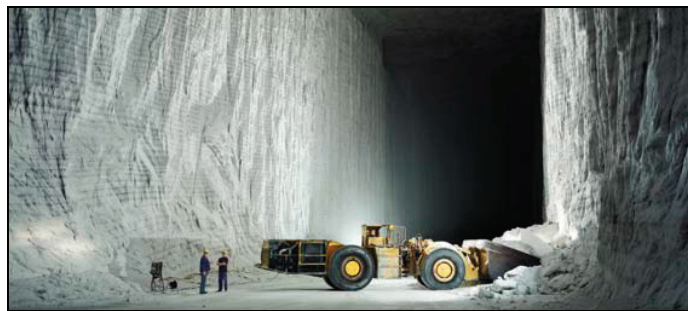

Abbildung 96 - K+S GB 2010

SALZ wird von K+S als ‚unabdingbar‘ für das menschliche Leben perspektiviert, was Metaphern (*weiße Gold, Geschenk der Götter, wahrer Schatz*<sup>202</sup>) und metareflektierende Hinweise (*elementarer Bestandteil des Lebens, lebensnotwendig*) in den Aussagen unterstreichen:

Salz ist ein elementarer Bestandteil des Lebens. Es war in der Vergangenheit so wertvoll, dass man es bis heute auch als „Weißes Gold“ bezeichnet. Schon in der Antike bei den Griechen galt Salz als Geschenk der Götter. Wegen seines Wertes diente es den Römern zeitweise sogar als Zahlungsmittel. Salz ist aus unserem Leben nicht wegzudenken, es ist lebensnotwendig und für die menschliche Ernährung überaus wichtig. (K+S GB 2010)

Der hohe Absolutheitsanspruch im Beispiel wird durch die Negation *nicht wegzudenken* unterstrichen. Darüber häufen sich die Adjektive (*nicht*) *vorstellbar, unabdingbar* sowie *un-*

---

<sup>201</sup> Auffallend ist auch, dass sich HEIDELBERGCEMENT stark für das *Ansehen* von BETON einsetzt: „Wir fördern das Ansehen und die Anwendung von Beton und anderen zementgebundenen Baustoffen und erforschen bzw. entwickeln mit unseren Kunden neue, erfolgversprechende Anwendungen.“ (HeidelbergCement Corporate Mission); „2010 wurden zahlreiche Projekte mit weißem und grauem TioCem® realisiert. Betonprodukte, wie beispielsweise Pflastersteine, die mit diesem photokatalytisch aktiven Zement hergestellt werden, reduzieren Luftschadstoffe wie Stickoxide und weisen eine geringere Oberflächenverschmutzung und damit bessere Ästhetik auf. In den USA und in vielen europäischen Ländern gibt es mittlerweile verschiedene Anwendungen, die auch die Aufmerksamkeit des Europäischen Parlaments erregt haben, das sich die Funktionen vorstellen ließ.“ (HeidelbergCement GB 2010). So wird *Aufmerksamkeit* auch an HEIDELBERGCEMENT per se geknüpft.

<sup>202</sup> Vgl. dazu: „Ein wahrer Schatz befindet sich auch in den Lagerstätten unserer Tochterfirma SPL in der chilenischen Atacama-Wüste: Die Reserven, entstanden aus den Überresten ehemaliger Salzseen, deren Wasser aufgrund starker Sonneneinstrahlung verdunstet ist, reichen dort alleine aus, um die Weltbevölkerung für die nächsten 200 Jahre zu versorgen.“ (K+S GB 2010).

denkbar und unentbehrlich<sup>203</sup> in den Texten von K+S – kombiniert mit physiologischen bzw. medizinischen Hinweisen zu SALZ:

Für unsere Körperfunktion ist der Konsum von Salz unentbehrlich. Es regelt den Flüssigkeitshaushalt, schützt den Körper vor Übersäuerung und fördert den Knochenaufbau. Äußerlich angewendet unterstützt Salz die Heilung von Haut-, Atemwegs- oder Gelenkbeschwerden, wird aber auch bei verschiedenen Allergieformen, Schlaflosigkeit und Kopfschmerzen erfolgreich eingesetzt. Bei Asthma und Bronchitis ist das Inhalieren mit Salzsole dem Heilungsprozess förderlich, denn es wirkt entzündungshemmend und antibakteriell. Auch als Badezusatz wirkt Salz wahre Wunder: [...] Man sieht: Ohne Kalium und Natrium würde es uns also an körperlicher und geistiger Fitness fehlen. (K+S GB 2010)

Durch diese Aussagen präsentiert sich der Salzproduzent K+S in der Rolle ‚Gesundheits-experte‘. Durch die Anlehnung an den Diskursbereich MEDIZIN wird die Glaubwürdigkeit bezüglich der Wichtigkeit von SALZ für das menschliche Leben verstärkt und die Autorität von K+S vergrößert, was der Hinweis auf einen Mangel im letzten Satz (*fehlen*), der ohne das Unternehmen entstände, vollendet.

Zuletzt findet sich im Korpus der ‚Produktbereich‘ KONSUMGÜTER, mit welchem sich BEIERSDORF unmittelbar auf Wortebene (*Konsumgüterunternehmen*) verknüpft:

Beiersdorf ist ein international führendes Konsumgüterunternehmen, das mit seinen Marken die Wünsche und Ansprüche der Verbraucher in den Mittelpunkt stellt. (BDF Nachhaltigkeitsbericht 2010)

HENKEL arbeitet sich wiederum mit dem *Chunking Down*-Prinzip von ‚Produktbereich‘ zu ‚Produktspezifika‘ vor:

Angesichts eines breiten Portfolios, das von modernen Alltagsprodukten für Verbraucher bis zu komplexen chemisch-technischen Systemlösungen für Industriekunden reicht, wurden Markenartikel und Technologien als strategische Säulen für die Zukunft bestimmt. So gibt es im Jahr 2006 drei Geschäftsfelder – Wasch-/Reinigungsmittel – Kosmetik/Körperpflege – Klebstoffe, Dichtstoffe und Oberflächentechnik. (Henkel Corporate Identity)

‚Produktspezifika‘ bedienen BEIERSDORF und HENKEL vor allem über den Sachverhalt MARKE (z.B. *Beiersdorf Markenwelt*<sup>204</sup>), der im anschließenden Kapitel dargestellt wird (→ 9.2.7.2). Dieses Kapitel zeigte indessen – bereits durch die hohe Beleganzahl – dass PRODUKTE (allgemein für ‚Produktbereich‘ und spezifisch für ‚Produktspezifika‘) in die Text- und Lebenswelt der untersuchten Unternehmen dominant integriert werden. Besonders durch die reichlichen beschreibenden (narrativen) Passagen konstruieren Unternehmen ihre PRODUKTE als Bausteine ihrer Sinnwelt. Dass PRODUKTE damit dinghafte (ontisch gegebene) TEILE der UNTERNEHMENSIDENTITÄT werden, unterstreichen auch Isaksson/Jørgensen (2010, 230ff.) in ihrem Ethos-Modell. Das UNTERNEHMEN identifiziert sich mit dem PRODUKT, das metonymisch (als Pars pro toto) für sein SELBST steht. Durch PRODUKTE wird das abstrakte Konstrukt

---

<sup>203</sup> Vgl. dazu: „[...] Kurz: Ohne Salz ist unser Leben nicht vorstellbar.“ (K+S GB 2010); „Gemeinsam mit Landwirten entwickeln wir ganzheitliche Lösungen. Zusammen mit dem Einsatz moderner Pflanzenbautechnologien ist eine mineralische Düngung mit den Hauptnährstoffen Stickstoff, Phosphat und Kali für weltweit höhere Ernteerträge unabdingbar.“ (K+S GB 2010).

<sup>204</sup> Vgl. dazu: „Beiersdorf Markenwelt: NIVEA – die größte Schönheitspflegemarke der Welt; Eucerin – eine der führenden Marken für medizinische Hautpflege [...]“ (BDF Imagebroschüre).

UNTERNEHMENSIDENTITÄT zumindest partiell greifbar gemacht und in die Alltagswelt der Anspruchsgruppen übersetzt (vgl. Kastens 2008, 295). Wie das folgende Kapitel zeigen wird, gelten ähnliche Bedingungen für die MARKE.

### 1.2.7.2 MARKE

PRODUKTE und MARKE sind eng miteinander verknüpft, was besonders bei *B-to-C*-Unternehmen (z.B. Automobilisten<sup>205</sup>) zu beobachten ist. Laut Schmid/Lyczek (2008, 47) ist eine Marke (*Brand*) die symbolische Eigenschaft eines Produktes. Als Symbol besteht sie aus einem Zeichen, das im Zuge der (Produkt-)Kommunikation mit einer spezifischen Bedeutung aufgeladen wurde. Diese Inhaltsseite wird durch die Ausdrucksseite mit einem spezifischen Markennamen und Markenzeichen/Logo erweitert (vgl. Schmid/Lyczek 2008, 60). Lexikalisch wird auf den Sachverhalt MARKE durch das *Keyword* und Hochfrequenzwort *Marke* sowie diverse Komposita mit *\*marke\**<sup>206</sup> verwiesen:

Unsere Konzernmarke ThyssenKrupp steht für Geschlossenheit und Stärke sowie den Qualitätsanspruch der Produkte und Leistungen des Konzerns. (ThyssenKrupp GB 2010)

So wurde schließlich das langfristige Ziel gesetzt, Henkel zu einer weltweit bekannten Unternehmensmarke auszubauen, die kraft ihrer Reputation sämtliche Geschäftsaktivitäten auf internationalen Märkten unterstützen und den Unternehmenswert steigern soll. Damit war ein neuer Gedanke geboren – der Gedanke, das Unternehmen Henkel insgesamt als Marke zu verstehen und zu führen. (Henkel Corporate Identity)

In den Belegen wird *Konzern-* bzw. *Unternehmensmarke* als symbolischer Ausdruck des UNTERNEHMENS gesehen und somit als sprachlicher Niederschlag von UNTERNEHMENSIDENTITÄT. DEUTSCHE POST, THYSSENKRUPP, HENKEL, LUFTHANSA, VW und DEUTSCHE BANK nutzen diese Konzeptualisierung (>Markenart< ‚Unternehmensmarke‘) ebenfalls, während andere (*B-to-C*)-Unternehmen (z.B. BEIERSDORF oder METRO) stärker auf die ‚Produktmarke‘ eingehen und diese einzeln stärker gewichten:

Mit einer konsequenten Markenstrategie hat sich Galeria Kaufhof zum Multispezialisten mit leistungsstarken, internationalen Sortimenten und hochwertigen Eigenmarken entwickelt. (Metro GB 2010)

In weiteren Belegen werden teilweise beide Ebenen (‚Unternehmensmarke‘ und ‚Produktmarke‘) gegenübergestellt:

Gemessen an der Zufriedenheit der Kunden mit dem Produkt, nimmt die Marke Audi auf den europäischen Kernmärkten sowohl im Vergleich mit den Konzernmarken als auch im Wettbewerbsumfeld eine Spitzenposition ein. (VW GB 2010)

---

<sup>205</sup> *B-to-C*-Unternehmen beziehen sich auf Privatkunden bzw. Konsumenten, während *B-to-B*-Unternehmen sich an Geschäftskunden bzw. andere Unternehmen wenden. Vgl. dazu van Iperen (2008, 133): „Kommunikation wird in diesem Zusammenhang immer wichtiger, um erfolgreich in gesättigten Märkten und bei Gleichheit der Produkte zu sein.“ Eventuell könnte man hierbei soweit gehen und behaupten, Sprache würde (vor allem bei den Automobilisten) bereits Produktbestandteil und nicht nur Arbeitswerkzeug.

<sup>206</sup> Vgl. dazu auch den Lexemverband um *Marke\** bei DEUTSCHE POST: „Für die Deutsche Post ermittelte das Beratungsunternehmen Semion Brand-Broker 2010 einen Markenwert von 12.692 MIO € – wie im Vorjahr Platz sechs im Ranking der wertvollsten deutschen Marken. Analysiert wurden unter anderem Finanzwert, Markenschutz, Markenimage und Markenstärke.“ (Deutsche Post GB 2010).



HENKEL differenziert ebenfalls strukturell zwischen *Unternehmensmarke* als *Dachmarke* und einzelnen *Produktmarken* unter Bezugnahme auf den ›Nutzen der Unternehmensmarke‹:

Darüber hinaus soll die Unternehmensmarke langfristig dazu beitragen, als Dachmarke einzelne Produktmarken zu unterstützen. Dieses ist zum Beispiel bei der Einführung neuer Produktmarken effizient, auf die der Markenname Henkel positiv abstrahlt, wodurch beträchtliche Marketingausgaben eingespart werden können. (Henkel Corporate Identity)<sup>207</sup>

Der ebenso auftretende Ausdruck *Arbeitgebermarke* (›Markenart‹ ‚Arbeitgebermarke‘) perspektiviert das UNTERNEHMEN aus der Sicht (potentieller) Mitarbeiter.<sup>208</sup> Weitere Komposita mit *\*marke* dienen dem Aufrufen einer besonders positiv konnotierten ›Markenart‹, da als erste Konstituente im Kompositum ein Begriff mit breiter und positiver Konnotationsebene genutzt wird, welcher wie ein wertendes Adjektiv fungiert:

Eine Traditionsmarke hat sich neu positioniert, denn durch die Zusammenführung von Commerzbank und Dresdner Bank entsteht eine neue Commerzbank. (Commerzbank Die Marke der neuen Commerzbank)

Der Weg von Henkel zur Weltmarke ist eng verknüpft mit dem Bekenntnis zu klaren Werten und einer transparenten Unternehmenspolitik. (Henkel Corporate Identity)<sup>209</sup>

Mit *Marke\** als erstem Wortelement werden wiederum ›Markenträger‹ evoziert, die häufig metonymisch auf das gesamte UNTERNEHMEN zurückweisen (*Markenartikelunternehmen*):

Als internationales Markenartikelunternehmen wachsen wir weltweit. (BDF Unser Profil)

Weitere ›Markenträger‹ sind ‚Markenprodukt‘<sup>210</sup> und ‚Markenname‘ (s.o. *Henkel*). Letzeres Attribut wird zahlreich aufgerufen durch die Ausdrücke *Markenzeichen*, *-logo* oder *-versprechen*:

Unser neues Markenzeichen zeigt, wie aus der Zusammenführung zweier Traditionsmarken etwas Neues, Wegweisendes und Modernes entsteht: ein Name, ein Zeichen, eine Bank. (Commerzbank Die Marke der neuen Commerzbank)

Für eine linguistische Analyse sind Komposita wie *Markenname*, *Markenzeichen* oder *Markenversprechen* besonders einträglich, da diese auf die Ausdrucksseite der MARKE verweisen (vgl. Kastens 2008, 114ff.), die aus verbalen (*Markenname*, *Markenversprechen*) und nonverbalen Elementen (*Markenzeichen*, *Markenlogo*) besteht. Diese Erkenntnis wird auf der Text-Bild-Ebene (s.u.) weiter verfolgt. Schließlich fallen unter die Komposita noch die Ausdrücke *Markenstrategie*, *Markenbildung*, *Markenführung*<sup>211</sup>, *Markenpositionierung*<sup>212</sup>, *Markenprofil*

---

<sup>207</sup> Vgl. dazu auch: „Henkel verfolgt nun konsequent die Strategie, überall, wo es einer Produktmarke nützt, auf den Packungen und in der Werbung deutlich auf den Hersteller hinzuweisen. Dieses geschieht in Form eines standardisierten Logos mit dem Dachmarkenslogan „Qualität von Henkel“, der in der jeweiligen Landessprache erscheint.“ (Henkel Corporate Identity).

<sup>208</sup> Die aufgeführten Komposita sind bereits als etablierte Fachtermini im Bereich der Markenkommunikation bzw. des *Brand Management* anzuerkennen.

<sup>209</sup> Vgl. dazu auch: „Marke Audi – Auf dem Weg zur Premiummarke Nummer 1 (VW GB 2010).“.

<sup>210</sup> Vgl. dazu: „Das Markenportfolio von Henkel umfasst weltweit mehr als 750 Marken, wozu sowohl internationale als auch regionale Marken gehören.“ (Henkel Corporate Identity); „Damit dieses positive Image erhalten bleibt, entwickeln wir die Beiersdorf Markenfamilien kontinuierlich weiter.“ (BDF Imagebroschüre).

<sup>211</sup> Vgl. dazu: „Dabei stehen heute und auch in Zukunft die Wünsche und Präferenzen der Kunden im Zentrum der globalen Markenführung.“ (VW GB 2010).



sowie *Markenarchitektur*, die u.a. das Konzept ›Marke ist ein artifizielles Konstrukt‹ evozieren. Wie bei PRODUKT findet sich auch ›Marke ist ein Lebewesen‹ (*Markenwerte*<sup>213</sup>, *Markenkraft*, *Markenstärke*).<sup>214</sup>, da die MARKE meist als PERSON modelliert wird.

Auf der Syntagmenebene tauchen diskurstypische Attribuierungsmuster auf (›Markenart‹ bzw. ›Markendisposition‹), die MARKEN ebenfalls eine ‚Markenphysis‘ zuschreiben:

Daimler steht für starke Marken mit hochwertigen Produkten. (Daimler Das Unternehmen 2011).<sup>215</sup>

Die *starke\* Marke\** ist innerhalb der Muster die häufigste Verbindung (Kollokation); ‚stark‘ wird durch die anaphorische Aufnahme von *stark\** auch an weitere Sachverhalte gekoppelt:

Starke Marken schaffen starke Gefühle. (Deutsche Bank Leitbild und Marke)

Deontisch formuliert die COMMERZBANK in Folge:

Ein starkes Unternehmen braucht eine starke Marke. (Commerzbank Die Marke der neuen Commerzbank)

Somit wird in diesem Beleg das Attribut ‚stark‘ metonymisch von der MARKE auf das UNTERNEHMEN übertragen sowie vice versa; die Parallelität der Satzglieder unterstreicht diesen kognitiven Vorgang. Auch die Adjektive *groß\** oder *wachsende\** heben das Attribut ‚Markenphysis‘ hervor (›Markenart‹ ‚groß‘, ‚wachsend‘):

Jede große Marke hat einen eindeutigen Kern – eine zentrale Idee, die sie prägt und trägt. (Deutsche Bank Leitbild und Marke)

Unsere Haarkosmetik-Marke Schwarzkopf ist die größte und am schnellsten wachsende Marke von Henkel. Sie zählt zu den global führenden Haarkosmetik-Marken. (Henkel GB 2010)

Des Weiteren werden die Attribute ‚spatio-temporal‘ von ›Markenart‹ bedient (*neue Marke*, *weltweite Marke*). Attribute, die sich auf die ›Markenart‹ ‚einzigartig‘ beziehen, tauchen ebenso auf:

Galeria Kaufhof positioniert sich im Einzelhandel als unverwechselbare und erfolgreiche Lifestyle-Marke. Ihre Warenhäuser befinden sich überwiegend in besten Innenstadtlagen. (Metro GB 2010)

Schließlich finden sich diskurstypische Evaluativa auch beim Sachverhalt MARKE (*gut\**, *beste\**, *führende\**, *wertvollste\**, *erfolgreiche\**<sup>216</sup>):

BMW bleibt führende Premiummarke. (BMW GB 2010)

Ein weiteres syntagmatisches Muster, welches das Konzept ›Markendisposition‹ akzentuiert, ist X (+Y) *der/unserer Marke* (z.B. *Erfolg unserer Marke*):

Ein hoher Bekanntheitsgrad und ein guter Ruf unserer Marken Deutsche Post und DHL machen uns für

---

<sup>212</sup> Vgl. dazu: „Die neue Marke besteht aus: 1) der Markenpositionierung: Sie beschreibt, wofür die neue Commerzbank steht, [...]“ (Commerzbank Die Marke der neuen Commerzbank).

<sup>213</sup> Vgl. dazu: „Bentley hat sich wieder auf seine ureigenen Markenwerte besonnen und sie in die Zukunft übertragen.“ (VW GB 2010).

<sup>214</sup> Die aufgeführten Ausdrücke sowie *Markeneigenschaften/-attribut/-werte* verweisen dabei auch auf die systemisch-semantische Markentheorie (vgl. Kastens 2008; Kastens/Lux 2014).

<sup>215</sup> Vgl. dazu auch *stärkste\* Marke\**: „Das Unternehmen verfügt heute mit BMW, MINI und Rolls-Royce über drei der stärksten Premiummarken in der Automobilbranche.“ (BMW GB 2010/Konzernporträt).

<sup>216</sup> Vgl. dazu auch das syntagmatische Muster *Erfolg der/unserer Marke* sowie *Faszination der/unserer Marke*.

Aktionäre, Mitarbeiter, Kunden und Lieferanten attraktiv und tragen so zum wirtschaftlichen Erfolg des Konzerns bei. (Deutsche Post GB 2010)

Neun erfolgreiche Marken bilden das einzigartige Portfolio des Volkswagen Konzerns. Sie begeistern Millionen von Kunden rund um den Globus. Das individuelle, unverwechselbare Image jeder einzelnen Marke haben wir im abgelaufenen Geschäftsjahr weiter geschärft. (VW GB 2010)

Das Attribut ‚*einzigartig*‘ wird auch in diesen Belegen regelhaft versprachlicht. *Ruf* und *Image* verweisen zudem auf die Außenperspektive, die in Bezug auf MARKE größtenteils eingenommen wird. Die syntagmatischen Muster ähneln außerdem denen, die beim Sachverhalt UNTERNEHMENSIDENTITÄT aufgefunden wurden, was auf eine enge Beziehung der Sachverhalte schließen lässt (>Identitätslokalisierung< ‚außen‘ → 9.1.9). Eine semantische Nähe lässt sich auch in Bezug auf PRODUKTE durch die Attribuierungsmuster mit Adjektiven, die Anthropomorphisierungen sowie die konstant genutzte adverbiale Bestimmung des Mittels *mit (X) Marken\** (>Marke als Instrument<) unterstellen:

Global führend mit Marken und Technologien. (Henkel Vision und Werte)

Beiersdorf gehört mit seinen starken Marken zu den weltweit führenden Unternehmen im Bereich Hautpflege. (BDF GB 2010)

Auf der Satzebene fällt die Konstruktion *Marke\** + *sein* + Adjektiv auf, womit wiederum das Konzept >Markendisposition< evoziert wird:

Unsere Marken sind international erfolgreich. (BDF Unser Profil)

Betrachtet man Sprachhandlungen, wird MARKE fortwährend in Sachverhaltsverknüpfungen gebraucht, indem kausale Relationen hergestellt werden (URSACHE → WIRKUNG): MARKE tritt hauptsächlich auf in der Realisierung MARKE → ERFOLG/(MEHR-)WERT:

Basis des wirtschaftlichen Erfolgs der METRO GROUP ist die Leistungsfähigkeit unserer Vertriebslinien. Deren Markenkraft und Konzeptstärke sind wesentlich für den Gesamterfolg. (Metro Corporate Principles)

Durch Perfektion und Liebe zum Detail erreicht Mercedes-Benz Vans eine herausragende Produktqualität und setzt mit wegweisenden Innovationen und hoher Wertbeständigkeit immer wieder neue Maßstäbe. So schafft die Marke echten Mehrwert für den Kunden. (Daimler Unternehmensinformationen 2010)

Eine weitere Verknüpfung ist MARKE → VERTRAUEN (→ EMOTION):

Führende Marken tragen langfristig zum Erfolg des Unternehmens bei. Führende Marken geben auch dem Kunden Orientierung, schaffen Vertrauen und wecken Emotionen. (Daimler GB 2010)

Die Belege offenbaren eine enge Verbindung von MARKE und VERTRAUEN, wobei die Konstruktion *Vertrauen schaffen* ausdrucksseitig überwiegt:

Merck – eine Qualitätsmarke, die weltweit Vertrauen schafft und genießt. (Merck Einzigartig – Der Merck Weg)

Die MARKE wird in diesen Belegen somit als PERSON konstruiert, die spezifische EMOTIONEN wie VERTRAUEN auslösen kann.<sup>217</sup> Diese subjektgebundenen EMOTIONEN werden dabei auf die MARKE transferiert (vgl. Kastens 2008, 111) und diese zum Metonym für VERTRAUEN:

---

<sup>217</sup> Vgl. dazu auf AFFEKTE/EMOTIONEN → dieser Anhang, 1.1: >Produkt oder Unternehmen generieren Emotionen ex ante<.

Orion ist die Marke des Vertrauens im nordamerikanischen Markt: Über 230 Städte und Metropolen in den Vereinigten Staaten setzen seit Jahrzehnten auf die hohe Zuverlässigkeit der Orion-Busse. (Daimler Das Unternehmen 2011)

Der Rezipient speichert folglich diese metonymische Verknüpfung ab (›Marke steht für Vertrauen‹). Das heißt, neben den rein objektiven Produktinformationen (WERT, QUALITÄT, PREIS), werden auch konnotative (emotionale) Zusatzinformationen (VERTRAUEN) internalisiert, die gemeinsam mit der MARKE aufgerufen werden (vgl. Kastens 2008, 110ff.). Vw präsupponiert diesen Zusammenhang in der folgenden Aussage durch *Vertrauenkapital*:

Aufgrund dieses Markenprofils und dem damit verbundenen Vertrauenkapital ist sie [die Marke VW, S.B.] für Millionen von Kunden die erste Wahl, wenn es um den Kauf eines Automobils geht. (VW GB 2010)

Durch diese semantische Aufladung kann die MARKE eine Identifikations- und Differenzierungsfunktion erfüllen (vgl. Demuth 2001, 4), was ALLIANZ betont:

Eine starke Marke sorgt für Vertrauen und fördert bei Kunden und Anteilseignern die Identifikation mit dem Unternehmen. (Allianz GB 2010)

Neben VERTRAUEN sind weitere Sachverhalte, die durch die MARKE an das UNTERNEHMEN geknüpft werden, STOLZ und TREUE bzw. LOYALITÄT (›Marke steht für Stolz‹; ›Marke steht für Treue‹):

Unsere Mitarbeiter sind stolz auf das Unternehmen, seine Marken und seine Werte. (BDF GB 2010)

Wenn Kunden mit unseren Produkten und Dienstleistungen zufrieden sind, ist die Wahrscheinlichkeit groß, dass sie unseren Marken auch treu bleiben. [...] Auch Škoda belegt bei der Markenloyalität – wie in den Jahren zuvor – einen Platz an vorderer Stelle. (VW GB 2010)

Auf der Textebene weist *Markenloyalität* dabei, wie andere Komposita (*Markenpersönlichkeit*, *Markenfamilie*, *Markenversprechen*), Adjektive (*starke\**, *große\**, *gewachsene\** + *Marke*) und Syntagmen mit dem Genitivattribut *X der Marke* (*Ansehen/Vertrauen der Marke*) auf die den Texten zugrunde liegende Konzeptualisierung ›Marke als Lebewesen‹ hin, indem Bedeutungsgehalte analog zur menschlichen IDENTITÄT als Persönlichkeitsmerkmale der MARKE konstruiert werden.<sup>218</sup> Ähnliche Isotopielinien zeigten sich bereits bei PRODUKT (›Produkt als Lebewesen‹). Explizit gehen folgende Belege darauf ein:

Unsere Marken sind international erfolgreich. Sie stehen für modernste Hautpflege und vereinen konsequente Verbraucherorientierung, zuverlässige Qualität und erlebbare Markenpersönlichkeit. (BDF Unser Profil)

Persönlichkeit entscheidet über Attraktivität. Das ist bei Marken nicht anders als bei Menschen. (Deutsche Bank Leitbild und Marke)

Die hier auftretende Isotopielinie ›Marke als Lebewesen‹ wird ebenso mit anthropomorphisierenden Metaphern bestückt: Neben der ‚Persönlichkeit‘ werden der MARKE die Bedeutungen ‚Alter‘ und ‚Genealogie‘ zugeschrieben:

Seit 2009 ist diese Traditionsmarke nun Familienmitglied in der K+S Gruppe. (K+S GB 2010)

---

<sup>218</sup> Vgl. dazu Aaker (1996, 141ff.), der diesbezüglich nahelegt, Markenattribute (*Brand Personalities*) analog zu Eigenschaften von menschlichen Personen zu charakterisieren (Alter, Geschlecht, soziale Klasse, Lebensstil, Interessen, Meinungen, Aktivitäten). Vgl. zu weitere Markensystematiken Kastens/Lux (2014, 249ff.).

FRESENIUS MEDICAL CARE grenzt sich von diesen Bedeutungen im Zuge der Alleinstellung ab, indem explizit die ‚Jugend‘ der MARKE ausgedrückt wird (*junge Marke*):

Unser Ziel lautet hier, die Abläufe in unserem Kliniknetz zu harmonisieren, die Identifikation der Klinikmitarbeiter mit den Werten von NephroCare zu stärken und die noch junge Marke sowohl im Unternehmen als auch außerhalb noch starker ins Bewusstsein unserer Anspruchsgruppen zu rücken. (FMC GB 2010).

Neben dieser dominanten Isotopielinie ›Marke als Lebewesen‹ findet sich auch ›Marke als artifizielles Konstrukt‹, welche sich metaphorisch durch die Repräsentationstexte zieht (s.o. die Komposita *Markenarchitektur*, *Markendesign*, *Markenbildung* etc.):

Um neue Fahrzeuge für bereits bestehende und noch zu erschließende Märkte effizient zu konzipieren, stehen den einzelnen Marken des Volkswagen-Konzerns sogenannte Modulbaukästen zur Verfügung. Sie gewährleisten, dass Synergieeffekte sowohl zwischen Modellen einer Baureihe als auch baureihen- und markenübergreifend optimal genutzt und gesteigert werden. (VW GB 2010)

Dieser Beleg präsupponiert, dass eine MARKE beliebig umgebaut werden kann.<sup>219</sup> Häufig wird dabei auch die Verbindung mit dem Verb *schärfen* vorgenommen (›Markenhandlung‹ ‚Markenschärfung‘):

Deshalb haben wir unser Markenprofil weiter geschärft, indem unsere Dachmarke noch klarer und konsistenter genutzt wird. (Bayer Leitbild)

Somit wird die MARKE in der Isotopielinie ›Marke als artifizielles Konstrukt‹ schließlich zum GEBÄUDE (*Dachmarke*), was BEIERSDORF mittels *Nivea-Häuser* (BDF Imagebroschüre) versinnbildlicht. Diese Metaphorik wird bis zur *Markenwelt* textuell ausgebaut:

Markenwelt erlebbar machen. Für den Markenauftritt ist entscheidend, wie Kunden den Umgang mit den weltweit rund 470.000 Mitarbeitern erleben. Dafür sind Mitarbeiter im Kundenkontakt überall mit Unternehmensbekleidung ausgestattet sowie Fahrzeuge, Gebäude, Werbe- und Informationsmedien einheitlich und einprägsam gestaltet. Wir wollen die gesamte Belegschaft weiterhin zu aktiven Botschaftern unserer Marken machen. Im Jahr 2010 ging die „dhl Brand World“ ans Netz. Auf dieser Internetplattform können Kunden, Mitarbeiter und Interessenten die Welt der Marke DHL erleben. (Deutsche Post GB 2010)<sup>220</sup>

Um in Folge die Text-Bild-Ebene noch entsprechend zu würdigen, muss zuletzt auf die besondere Ausdrucksfunktion der MARKE (neben ihrer inhaltlichen Kondensierung) eingegangen, da durch Ausdrücke wie *Markenzeichen* oder *-versprechen* auch die zeichenhaften Gestaltungselemente der Ausdrucksseite betont werden. Der zeichenhafte Charakter der MARKE wird in den Aussagen wiederholt metasprachlich aufgegriffen (z.B. durch *Zeichen*):

Die neue Marke vereint die Stärken der beiden Traditionsmarken und setzt so ein sichtbares Zeichen des Zusammenwachsens. (Commerzbank Die Marke der neuen Commerzbank)

Die MARKE als visuelles Zeichen symbolisiert dabei den Inhalt (vgl. Koppelman 2001, 3), was das Verb *symbolisieren* im Kontext von *Marke* nahelegt (›Marke als Symbol für einen bestimmten Inhalt‹):

Die Marke Bayer besitzt eine besondere Strahlkraft und zählt zu den bekanntesten weltweit. Gleichzeitig

---

<sup>219</sup> Vgl. dazu auch: „Beiersdorf reagiert auf die gesellschaftlichen Veränderungen in den 20er Jahren und passt das Markenimage von nivea an.“ (BDF Imagebroschüre).

<sup>220</sup> Vgl. dazu auch die *Beiersdorf Markenwelt* (text-bildlich) in der BEIERSDORF *Imagebroschüre*.

symbolisiert unsere Marke Vertrauen und Zuverlässigkeit und steigert somit die Wettbewerbsfähigkeit des Unternehmens. (Bayer Leitbild)

Die *Marke Bayer* ist somit ein mit einem Zeichen versehener Inhalt für ‚Vertrauen‘ und ‚Zuverlässigkeit‘. Um sich als Form-Inhalts-Korrelat zu verfestigen, müssen solche Zeichen jedoch konventionalisiert werden, worauf HENKEL eingeht (*[e]inprägsame und einheitliche Symbole*):

Einprägsame und einheitliche Symbole sind notwendig, um einer Marke ein Gesicht zu geben und ihre Botschaft zu verbreiten. (Henkel Corporate Identity)

Diese besondere Verzahnung von Inhalts- und Ausdrucksseite der MARKE reflektiert auch die COMMERZBANK ausführlich im Text *Die Marke der neuen Commerzbank*, indem unter anderem auf den Ausdruck *Markenzeichen* ausdrücklich eingegangen wird:

Das neue Markenzeichen besteht aus drei wesentlichen Elementen: dem Namen „Commerzbank“ mit neuem Schrifttyp, der Farbe Gelb und dem dreidimensionalen Band. Die Wortmarke „Commerzbank“ ist souverän und klar und drückt mit ihrer neuen Typografie Stabilität und Qualität aus. (Commerzbank Die Marke der neuen Commerzbank)

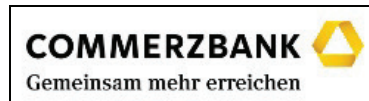

Abbildung 97 - Commerzbank Die Marke der neuen Commerzbank

Die COMMERZBANK versucht folglich, von der Ausdrucksseite (*Schrifttyp, der Farbe gelb und dem dreidimensionalen Band*) bestimmte Bedeutungen abzuleiten (‚Souveränität‘, ‚Klarheit‘, ‚Stabilität‘ und ‚Qualität‘). Diese kausale bzw. indexikalische Ableitung wird durch *drückt* [...] *aus* verbalisiert. Das Konzept ›Marke als Symbol für einen bestimmten Inhalt‹ wird auch in weiteren Belegen mittels des Musters *X [MARKE] steht für Y (+Z)* realisiert:

Lufthansa steht traditionell für Technologie auf höchstem Niveau. (Lufthansa GB 2010)

Die DEUTSCHE POST bindet diese Konstruktion an den Ausdruck *Unternehmen* zurück und erreicht damit die direkte metonymische Ersetzung von *[MARKE] steht für [UNTERNEHMEN]*:

Die Marke Deutsche Post steht für ein Unternehmen, das weltweit Maßstäbe für Qualität, Technik und Effizienz setzt und sich den Herausforderungen dieses reifen Marktes sehr erfolgreich gestellt hat. (Deutsche Post GB 2010)

Schließlich können MARKEN als Zeichenobjekte der Ausdrucksseite auch ikonographisch gelesen werden, d.h. die Form des Markenlexems reicht, um auf das Referenzobjekt UNTERNEHMEN zu verweisen (Logo → Ikon) (vgl. Kastens 2008, 123). DAIMLER nutzt diese Konzeptualisierung durch das Syntagma *Marke mit dem Stern*, um auf MERCEDES-BENZ/DAIMLER anzuspielen:<sup>221</sup>

---

<sup>221</sup> Zusätzlich wird */Stern/* als Symbol gedeutet: „Mercedes-Benz: der Stern unter den Premiummarken. Seit fast 125 Jahren steht der Stern für die Spitze des Automobilbaus und symbolisiert wie kein anderes Markenzeichen Perfektion, Faszination und Verantwortung.“ (Daimler Unternehmensinformationen 2010). Die visuellen und

Die Fahrzeuge der Marke mit dem Stern zeichnen sich aus durch Sicherheit, Komfort, Qualität, Zuverlässigkeit sowie faszinierendes Design und nachhaltige Mobilität. (Daimler Unternehmensinformationen 2010)

Die MARKE erweist sich damit, ähnlich wie das PRODUKT, als essentielles Identitätselement (angezeigt durch u.a. *unverwechselbar\**, *Wiedererkennungswert*), das vor allem ausdrucksseitig dominant platziert wird.<sup>222</sup> Auf der Inhaltsseite ist die MARKE ein komplexes Wissenssystem mit verschiedenen Bedeutungsebenen (vgl. Kastens 2008, 138). Diese spezifischen Wissens- und Gefühlsstrukturen werden durch rekurrent-dominante Anreicherungen der ›Markendisposition‹ unternehmensintern generiert (*X steht für Y*), die der Individualisierung und Differenzierung dienen und von Anspruchsgruppen wiederum metonymisch auf das UNTERNEHMEN transferiert werden. MARKEN haben damit eine wichtige Referenzfunktion: Sie stehen als Symbol für etwas, das der Rezipient auf das gesamte UNTERNEHMEN überträgt und sind daher ein wichtiger „semantischer Träger“ (Kastens 2008, 295<sup>223</sup>) in Bezug auf UNTERNEHMENSIDENTITÄT.

### 1.2.7.3 WERTSCHÖPFUNGSKETTE

„Jedes Unternehmen ist eine Ansammlung von Tätigkeiten, durch die sein Produkt entworfen, hergestellt, vertrieben, ausgeliefert und unterstützt wird. All diese Tätigkeiten lassen sich in einer Wertkette darstellen.“ (Porter 1985, 36)<sup>224</sup>

Nach diesem Zitat lässt sich die WERTSCHÖPFUNGSKETTE in direkten Zusammenhang mit der IDENTITÄT eines UNTERNEHMENS bringen, da sie die Gesamtheit der Phasen, ausgehend von RESSOURCEN, die verbraucht werden, zu weiteren TÄTIGKEITEN, die in PROZESSEN miteinander verbunden sind (wie PRODUKTION, AUSLIEFERUNG etc.), darstellt und letztendlich den ökonomischen WERT<sup>225</sup> für das UNTERNEHMEN ausmacht. Insbesondere FRESenius MEDICAL CARE und FRESenius beziehen sich sprachlich auf den Sachverhalt WERTSCHÖPFUNGSKETTE in ihren Repräsentationstexten. Im gesamten Korpus wird auf diesen primär mittels der Ausdrücke *Wertschöpfung\** sowie *Wert schöpfen* referiert:

---

ästhetischen Markenelemente der Ausdrucksseite versuchen Unternehmen ganzheitlich mittels ihres *Corporate Design* auszugestalten.

<sup>222</sup> Dies bezieht sich auf Markenlexem + Logo als Symbol, da keine „vergleichbare Form von Signifikant [wird] in sich so kohärent ausgebildet [wird] wie das Markenlexem“ (Kastens 2008, 123).

<sup>223</sup> PRODUKTE haben nach Kastens (2008, 104f.) eine expressive Funktion (Produkt X bringt Y zum Ausdruck), eine deklarative Funktion (Produkt X bewirkt, dass der Rezipient Unternehmen als Y wahrnimmt) sowie eine distinktive Funktion (Rezipient unterscheidet sich von X durch Produkt Y).

<sup>224</sup> Das Grundmodell der Wertkette nach Porter (1985) sieht als Primäraktivitäten diejenigen, die einen direkten wertschöpfenden Beitrag zur Erstellung von Produkten/Dienstleistungen liefern (Eingangslogistik, Produktion, Ausgangslogistik, Marketing & Vertrieb und Kundenservice). Unterstützungsaktivitäten sind Tätigkeiten, die für die Ausübung der primären Aktivitäten die notwendige Voraussetzung sind und daher nur einen indirekten Beitrag zur Erstellung von Produkten/Dienstleistungen leisten (Unternehmensinfrastruktur, Personalwirtschaft, Technologieentwicklung und Beschaffung).

<sup>225</sup> Vgl. zu WERT (*Wert/e*) das Kapitel WERTE (→ dieser Anhang, 1.5.1) sowie PROFIT/GEWINN (→ dieser Anhang, 1.10.2).



Die ökonomische Wertschöpfung ist für MAN von zentraler Bedeutung und spiegelt sich durch die Erreichung anspruchsvoller Ziele bei der Umsatzrendite und der Rendite auf das eingesetzte Kapital wider. Insbesondere ist die Stabilität in der Renditeerzielung von hoher Wichtigkeit – hier setzt MAN auf den nachhaltigen Ausbau von Service- und Dienstleistungsstrukturen. (MAN GB 2010)

Syntagmatisch wird durch *langfristige\*/ökonomische\*/betriebliche\* Wertschöpfung*<sup>226</sup> auf das Konzept ›Wertschöpfungsart‹ Bezug genommen. Dass die WERTSCHÖPFUNG dabei als ein ›(geordneter) Kreislauf von Phasen und Tätigkeiten‹ verstanden wird, zeigen die Komposita *Wert(schöpfungs)kette*, *Liefer(anten)kette*, *Produktionskette*, *Energiekette* und *Prozesskette* an, die alle die KETTEN-Metaphorik integrieren. Die *Wertschöpfungskette* wird am häufigsten unter diesen Lexemen ausdrucksseitig genutzt:

Munich Re versteht sich deshalb heute mehr denn je als Servicerückversicherer und bietet Produkte, Lösungen und Dienstleistungen an, die unsere Kunden über die gesamte Wertschöpfungskette hinweg unterstützen. (Munich Re Strategie)

MUNICH RE fügt hinzu, dass die ‚Gesamtumfassung‘ der WERTSCHÖPFUNGSKETTE in der unternehmerischen Wertschöpfung zentral ist (*gesamte Wertschöpfungskette*). Auch die ‚Optimierung‘ der WERTSCHÖPFUNGSKETTE wird als Bedeutung dominant gesetzt (›Wertschöpfungshandlung‹ ‚Wertschöpfungsoptimierung‘) und besonders durch die Kookkurrenz von *Wertschöpfungskette* und *optimieren/Optimierung* ausgedrückt:

Um die Effizienz zu verbessern und die Materialversorgung sicherzustellen, optimieren wir fortlaufend die Wertschöpfungskette bei gleichzeitiger Erhaltung eines exzellenten Qualitätsniveaus. Diese Aktivitäten begleiten wir, indem wir unsere Beschaffungsprozesse verstärkt konsolidieren, zentralisieren und automatisieren. (Henkel GB 2010)

Der Kern der unternehmerischen Wertschöpfung ist laut Schmid/Lyczek (2008, 42) jedoch die PRODUKTION, auf die durch *Produktionskette* referiert wird:

Darüber hinaus deckt das Portfolio der Geschäftseinheit sämtliche Bereiche der pharmazeutischen Produktionskette ab. (Merck GB 2010)

In der PRODUKTIONSKETTE werden Produktionsfaktoren (materielle RESSOURCEN wie MASCHINEN, ROHSTOFFE und immaterielle RESSOURCEN wie ARBEIT oder WISSEN) in materielle/immaterielle „Outputgüter“ (Schmid/Lyczek 2008, 42) umgewandelt. Interessanterweise wird die PRODUKTIONSKETTE – trotz ihrer zentralen Stellung für Unternehmen – seltener versprachlicht als andere Bereiche, wie etwa die LIEFERKETTE:

Im Unternehmensbereich SUPPLY CHAIN erbringen wir als Weltmarktführer in der Kontraktlogistik Lager, Transport- und Mehrwertleistungen entlang der gesamten Lieferkette für Kunden verschiedener Branchen. (Deutsche Post GB 2010)

Die gesamte Lieferkette im Blick. (Telekom GB 2010)

Die Belege zeigen durch das Muster *gesamte\* Lieferkette* wiederum das Attribut ‚Gesamtumfassung‘ an. Der zweite Beleg der TELEKOM verweist auf einen weiteren essentiellen As-

---

<sup>226</sup> Vgl. dazu: „Sie [SAP-Anwendungen, S.B.] sollen Unternehmen in die Lage versetzen, ihre Geschäftsprozesse effizient und flexibel zu gestalten, Entscheidungen zeitnah zu treffen und die betriebliche Wertschöpfung nachhaltig zu verbessern.“ (SAP GB 2010).

pekt bei LIEFERKETTE, der in zahlreichen Belegen angesprochen wird (z.B. durch *im Blick, unter Kontrolle* etc.): es geht um die ‚Kontrolle‘ der LIEFERKETTE:

MEHR (NÄHR)WERT. Mit SAP Business ByDesign hat das energiegeladene Unternehmen nun seine Lieferkette, sein Finanzmanagement und alle anderen Geschäftsvorgänge unter Kontrolle – sodass der Gewinn weiter sprudelt. (SAP GB 2010)<sup>227</sup>

Durch die Erweiterung von *Lieferkette* zum Kompositum *Lieferantenkette* wird auch ein sozialer Aspekt miteinbezogen und oftmals mit dem Verantwortungsbegriff verknüpft:

Soziale Verantwortung gegenüber den Mitarbeitern und in der Lieferantenkette. (BMW GB 2010)<sup>228</sup>

Schließlich findet sich unter den Komposita auch der Ausdruck *Energiekette*:

Von der Solarzelle über das Stromnetz bis zur Waschmaschine – Leistungshalbleiter, Mikrocontroller und Sensoren von Infineon optimieren die gesamte Energiekette. (Infineon Wer wir sind)

Bei WERTSCHÖPFUNGS-, LIEFER- sowie ENERGIEKETTE lässt sich somit zusammenfassend feststellen, dass immer wieder die ‚Gesamtumfassung‘ dieser angesprochen wird, welche das Unternehmen garantiert, und für welche es im Sinne von Verantwortung und Nachhaltigkeit einsteht. BMW sowie HENKEL gehen auch textuell darauf ein:

Unsere Aktivitäten richten wir entlang der gesamten Wertschöpfungskette konsequent und systematisch auf die Herausforderungen einer nachhaltigen Entwicklung aus. Diese Herausforderungen haben wir in fünf übergreifende Fokusfelder gegliedert: Energie und Klima, Wasser und Abwasser, Materialien und Abfall, Gesundheit und Sicherheit sowie gesellschaftlicher/sozialer Fortschritt. [...]. Daher gehört zu unserem Selbstverständnis auch der Anspruch, dass alle neuen Produkte in mindestens einem der fünf definierten Fokusfelder einen Beitrag zur nachhaltigen Entwicklung leisten. (Henkel GB 2010)<sup>229</sup>

Durch den Ausdruck *Selbstverständnis* im letzten Satz wird der Rückbezug zu UNTERNEHMENSIDENTITÄT bei WERTSCHÖPFUNGSKETTE wieder herausgestellt. Dagegen setzen andere Aussagen zum Sachverhalt WERTSCHÖPFUNGSKETTE nicht das Konzeptattribut ‚Gesamtumfassung‘, sondern nur ‚Teile‘ dominant. Dadurch erscheint die WERTSCHÖPFUNGSKETTE als eine Aneinanderreihung von selbstständigen Strukturen, was insbesondere FRESenius MEDICAL CARE und FRESenius aufgreifen. Sprachlich-strukturell wird dies durch die Präpositionen *von...[über]...bis* realisiert:

---

<sup>227</sup> Vgl. dazu auch: „Unsere Stakeholder hinterfragen zunehmend die Einhaltung von Menschenrechten, angemessenen Arbeitsbedingungen und Umweltschutz in den Herkunftsländern von Waren und Rohstoffen. Wir wollen sicherstellen, dass unsere Lieferkette keine Risiken für die Unternehmensreputation birgt.“ (RWE Unsere Verantwortung 2010). Weitere Aspekte, die sich auf LIEFERKETTE beziehen, sind ‚Umweltfreundlichkeit‘ und ‚Wirtschaftlichkeit‘.

<sup>228</sup> Ebenfalls seriell erscheint das Syntagma *Auswahl der Lieferanten*. Durch den Ausdruck *Lieferantenmanagement* wird ein systematisches Vorgehen angezeigt: „Mit Hilfe unseres Lieferantenmanagements wählen wir Zulieferer sehr sorgfältig nach Eignung und Leistungsfähigkeit aus, [...]“. (FMC GB 2010).

<sup>229</sup> Vgl. dazu: „Nachhaltiges Wirtschaften kann jedoch nur dann wirken, wenn es die gesamte Wertschöpfungskette umfasst. Daher stellt die BMW Group nicht nur höchste Anforderungen an sich selbst, sondern fordert ökologische und soziale Standards auch von ihren Lieferanten und Partnern. Entsprechende Nachhaltigkeitskriterien sind daher durchgängig in unseren Einkaufsbedingungen sowie in der Lieferantenbewertung verankert. Im Nachhaltigkeitsfragebogen, der fester Bestandteil für die Aufnahme in das Lieferantennetzwerk der BMW Group ist, erteilt der potenzielle Lieferant eine vollständige Selbstauskunft.“ (BMW GB 2010).

VON DER BESCHAFFUNG BIS ZUM SUPPLY CHAIN MANAGEMENT. Als Branchenführer mit langjähriger Erfahrung in der Dialyse kann Fresenius Medical Care in seinem Produktgeschäft auf umfangreiche unternehmenseigene Ressourcen zurückgreifen: Produktionskapazitäten in allen Regionen, Know-how rund um hochkomplexe Fertigungstechnologien und -prozesse sowie umfassende Kompetenz in Qualitätsmanagement, Beschaffung und Logistik für anspruchsvolle medizinische Erzeugnisse. (FMC GB 2010)

Ebenso geschieht sprachlich das exemplarische Herausgreifen der einzelnen ‚Teile‘, was die folgenden Belege durch das Syntagma *Forschung und Entwicklung* (*beispielsweise*) und im zweiten Beispiel durch *Produktion* mit anschließendem Doppelpunkt anzeigen:

Wie beim ersten Programm legen unsere Umweltmanager gemeinsam mit den jeweiligen Geschäftsbereichen Umweltziele für die einzelnen Stufen entlang der Wertschöpfungskette fest, also beispielsweise für die Forschung und Entwicklung oder für unsere Dialysekliniken. (FMC GB 2010)

Produktion: Der Schwerpunkt liegt auf der ständigen Verbesserung der Prozesse und Kostenstruktur. Dazu gehören die kosteneffiziente Substitution fossiler Brennstoffe und natürlicher Rohstoffe ebenso wie die Reduzierung des Energiebedarfs in der Produktion. (HeidelbergCement GB 2010)

Auf der Text-Bild-Ebene veranschaulichen sequentielle Grafiken ebenfalls das Konzeptattribut ‚Teile‘. Bei FRESENIUS MEDICAL CARE ist die konstituierte WERTSCHÖPFUNGSKETTE als */zyklischer Verlauf/* abgebildet:

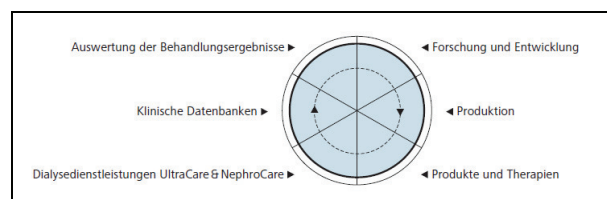

Abbildung 98 - FMC GB 2010

Bei RWE ist die WERTSCHÖPFUNGSKETTE dagegen durch einen */vertikalen Verlauf/* dargestellt:

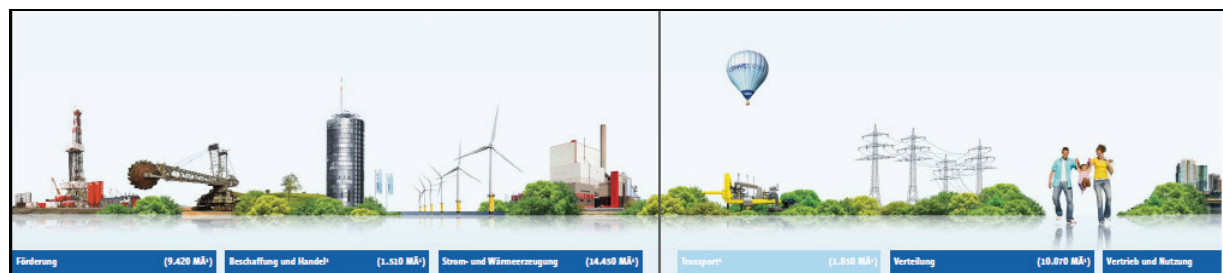

Abbildung 99- RWE Unsere Verantwortung 2010

K+S nutzt ebenso graphisch einen */vertikalen Verlauf/*; zudem wird sprachlich der Ausdruck *Wertschöpfungsstufen*<sup>230</sup> gewählt (→ Abb. 100). Der Verbeinsatz bei der Benennung der WERTSCHÖPFUNGSSTUFEN bei K+S (z.B. *Fördern, Veredeln, Vermarkten*) differenziert sich von anderen Unternehmen, die zur Bezeichnung Substantive wählen (z.B. *Produktion, Vertrieb*).

<sup>230</sup> Vgl. dazu: „Das Lieferantenmanagement ist wegen der steigenden Komplexität der Lieferantenstrukturen darauf ausgerichtet, bei der Auftragsvergabe für ausgewählte Bauteile nicht nur die liefernde Instanz zu betrachten, sondern auch die vorgelagerten Wertschöpfungsstufen einzubeziehen.“ (VW GB 2010).

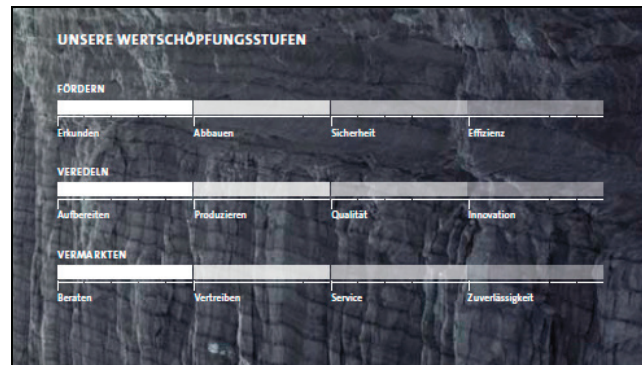

Abbildung 100 - K+S GB 2010

Dagegen heben wiederum alle Unternehmen sprachlich homogen hervor, dass die in der WERTSCHÖPFUNGSKETTE enthaltenen unternehmerischen TÄTIGKEITEN durch PROZESSE miteinander verbunden sind (>Prozesse verbinden Wertschöpfungshandlungen<). Dieses Konzept wird durch *Prozesse*\* sprachlich integriert:<sup>231</sup>

Der Schwerpunkt liegt auf der ständigen Verbesserung der Prozesse und Kostenstruktur. Dazu gehören die kosteneffiziente Substitution fossiler Brennstoffe und natürlicher Rohstoffe ebenso wie die Reduzierung des Energiebedarfs in der Produktion. (HeidelbergCement GB 2010)

Diese PROZESSE, auf welche spezifischer durch die substantivischen Komposita *Produktionsprozess*\*<sup>232</sup>, *Logistikprozess*\*<sup>233</sup>, *Transportprozess*\* und *Beschaffungsprozess*\*<sup>234</sup> referiert wird, gilt es, ebenfalls zu ‚systematisieren‘ und zu ‚verbessern‘ (>Prozesshandlung< ‚Prozesssystematisierung‘, ‚Prozessverbesserung‘):

Um die Effizienz zu verbessern und die Materialversorgung sicherzustellen, optimieren wir fortlaufend die Wertschöpfungskette bei gleichzeitiger Erhaltung eines exzellenten Qualitätsniveaus. Diese Aktivitäten begleiten wir, indem wir unsere Beschaffungsprozesse verstärkt konsolidieren, zentralisieren und automatisieren. (Henkel GB 2010)

Dies beinhaltet wiederum ebenfalls den Aspekt der ‚Kontrolle‘, der bereits angesprochen wurde. Im Kontext von *\*prozesse* finden sich daher auch die Lexeme *Monitoring* sowie *Steuerung*:

Für die Beschaffung von Standardwaren, Dienstleistungen und Energierohstoffen haben wir Monitoring-Prozesse eingeführt, die uns Erkenntnisse darüber liefern, ob unsere Lieferanten die Vorgaben des Global Compact einhalten. Im vergangenen Jahr waren bereits zwei Drittel unserer Geschäftsbeziehungen in diese Prozesse integriert. 2013 sollen es 95 % sein. (RWE GB 2010)

<sup>231</sup> Vgl. dazu auch die Metapher *Prozesskette* sowie die Rollenzuweisung durch *Prozessexperten*: „Lufthansa Systems deckt weltweit als einziger Anbieter die gesamte Prozesskette des Luftverkehrs ab.“ (Lufthansa GB 2010); „Werkzeug und Prozessexperten aus den Bereichen Beschaffung und Qualitätssicherung arbeiten Hand in Hand daran, dass die Produktion neuer Fahrzeugmodelle erfolgreich anläuft und die anschließende Serienproduktion störungsfrei verläuft.“ (VW GB 2010).

<sup>232</sup> Vgl. dazu: „Mit der Optimierung unserer eigenen Produktionsprozesse und unserer Wertschöpfungsketten leisten wir – gemeinsam mit unseren Partnern – relevante Beiträge zum Klimaschutz.“ (Henkel GB 2010).

<sup>233</sup> Vgl. dazu: „Für den Ausbau langfristiger Geschäftsbeziehungen wählen wir Lieferanten aus, bei denen wir großes Potenzial sehen bezüglich Innovation, Optimierung von Herstellungskosten und Logistikprozessen sowie Risikomanagement zur Vermeidung von Lieferengpässen.“ (Henkel GB 2010).

<sup>234</sup> Vgl. dazu: „Anhand definierter Kriterien beurteilten wir den gesamten Beschaffungsprozess von der Anfrage über die Lieferung der Leistung bis zur Abrechnung.“ (K+S GB 2010).

Dass die Aspekte ‚Steuerung‘ und ‚Kontrolle‘ im Korpus dominant vertreten sind, verweist auf ein grundlegendes Denkmuster innerhalb der WIRTSCHAFT, das als axiomatisches Schema unter ›universale Steuerbarkeit‹ (→ 6.5.1.3) bereits aufgeführt wurde. Komposita wie *Lieferantenmanagement* (s.o.) nehmen dieses durch das Morphem *\*management* auf und beziehen den Aspekt ‚Steuerung‘ auf weitere ‚Teile‘ der WERTSCHÖPFUNGSKETTE:

Das Beschaffungsmanagement von HELIOS bündelt klinik- und fachübergreifend sowohl das Wissen der Ärzte und des Pflegepersonals als auch die wirtschaftlichen Kompetenzen im kaufmännischen Bereich. (Fresenius GB 2010)

Pro Jahr befördern wir weltweit mehr als 60 Mio. t. Darum stimmen wir die gesamte Lieferkette mit unserem Supply-Chain-Management perfekt aufeinander ab. (K+S GB 2010)

Teilweise wird der Aspekt ‚Steuerung‘ auch durch das Syntagma (*aktives*) *Management der X (Wertschöpfungskette)* ausgedrückt:

Wir betreiben Kostenoptimierung auf der Basis von Benchmarking und verbessern das Ergebnis durch aktives Management der Wertschöpfungskette. Dabei steht die Optimierung von Produktions- und Logistikkosten im Vordergrund. (HeidelbergCement Corporate Mission)<sup>235</sup>

Ein zweites Attribut, das zentral für den Sachverhalt WERTSCHÖPFUNGSKETTE scheint und bereits erwähnt wurde, ist die permanente ‚Optimierung‘. Daher tauchen im Kontext von *Wertschöpfungskette\** vor allem die Morpheme *\*optimier\** sowie *verbesser\**, meist durch Verben realisiert, auf (›Wertschöpfungshandlung‹ ‚Wertschäftungsoptimierung‘), was der Beleg von HEIDELBERGCEMENT ebenso offenbart. ‚Optimierung‘ kann dabei auch bedeuten, die WERTSCHÖPFUNGSKETTE auf ‚Effizienz‘ hin zu überprüfen (vgl. Schmid/Lyczek 2008, 28), etwa bei der Selektion von LIEFERANTEN oder bezüglich der KOSTEN. FRESENIUS reflektiert das ‚Effizienz‘-Kriterium dabei wie folgt:

Wichtig für die Profitabilität von Fresenius ist eine effiziente Gestaltung der Wertschäftungskette. (Fresenius GB 2010)

HENKEL nimmt exemplarisch auf ‚Effizienz‘(*effiziente Weise, Effizienz, optimieren*) mittels BEISPIELEN (*Herstellung von Kunststoff-Flaschen*) Bezug:

Im Unternehmensbereich Wasch-/Reinigungsmittel kooperieren wir weltweit in allen wichtigen Flüssigprodukte-Fabriken mit ausgewählten Partnern zur Herstellung von Kunststoff-Flaschen direkt neben den Produktionsanlagen. Die Mehrzahl der Kunststoff-Flaschen für unsere Wasch- und Reinigungsmittel wird auf diese effiziente Weise geliefert. Durch die Kooperation mit den Lieferanten optimieren wir gemeinsam die Herstellprozesse im Werk – bei hoher Flexibilität und optimalen Lagerbeständen. (Henkel GB 2010)

Wie der folgende Beleg veranschaulicht, kann eine ‚Optimierung‘ der WERTSCHÖPFUNGSKETTE jedoch auch eine ‚Reduktion‘ von gewissen FAKTOREN bedeuten (z.B. *Kosten senken*).

Auch im Jahr 2011 werden wir unser globales Produktionsnetzwerk mit Blick auf die regionalen Bedürfnisse straffen, um unsere Herstellkosten weiter zu senken. (Henkel GB 2010)

Neben den KOSTEN sind besonders die UMWELTAUSWIRKUNGEN (*\*emissionen*) als Elemente

---

<sup>235</sup> Es werden *Strategien, Programme* und *Systeme* zum verbesserten *\*management* der WERTSCHÖPFUNGSKETTE ausgearbeitet: „Im Rahmen von Shape 2012 hat die Vertriebslinie ein sogenanntes Product-Lifecycle-Management-System eingeführt.“ (Metro GB 2010).



der ‚Reduktion‘ verspricht (durch \**umwelt*\* oder *klima*\*):

Schließlich bietet das Umweltbewusstsein der Kunden Chancen, überdurchschnittlich zu wachsen. Sie wollen ihre CO<sub>2</sub>-Emissionen nachhaltig senken, fragen daher vermehrt energieeffiziente Transporte und klimaneutrale Produkte nach. (Deutsche Post GB 2010)

Die ‚Reduktion‘ von CO<sub>2</sub>-EMISSIONEN geht somit häufig mit der Kopplung an UMWELT-/KLIMASCHUTZ einher, wie die Belege zeigen. Während die ‚Reduktion‘ in den aufgeführten Beispielen über Verben auf der Satzebene ausgedrückt wurde (*senken*, *reduzieren*), finden sich daneben auch die Substantive *Reduzierung* oder *Reduktion* im Korpus:

In den vergangenen Jahren haben wir bemerkenswerte Fortschritte erzielt, unter anderem bei der Reduktion unserer CO<sub>2</sub>-Emissionen und Umwelteinflüsse, der Weiterverwertung von Abfallstoffen als Brennstoffe und der Förderung der biologischen Vielfalt in unseren Abbaustätten. (HeidelbergCement GB 2010)

Die an den Ausdruck *Reduktion* angeschlossenen Genitivattribute (*CO<sub>2</sub>-Emissionen und Umwelteinflüsse*) manifestieren sich vielfach bei HEIDELBERGCEMENT, was sich durchaus aus seiner unternehmerischen Tätigkeit erklären lässt.<sup>236</sup>

In weiteren Belegen wird mittels den Adjektiven *emissions-/schadstoffarm* gearbeitet, die konzeptuell nicht auf ‚Reduktion‘ hindeuten, sondern bereits eine ‚Knappheit‘ von EMISSIONEN präsupponieren, was dadurch eine positive Konzeptualisierung erzeugt:

BLUETEC ist eine Schlüsseltechnologie von Daimler und mittlerweile ein Synonym für schadstoffarme und verbrauchsoptimierte Diesellaggregate für Pkw und Nutzfahrzeuge. (Daimler GB 2010)

Die TECHNOLOGIE *BLUETEC* und somit metonymisch DAIMLER (*von Daimler*) werden in diesem Beleg metasprachlich (*Synonym*) mit SCHADSTOFFARMHEIT verknüpft. Ebenfalls finden sich Möglichkeiten für eine positiv konnotierte sprachliche Repräsentation, wenn Unternehmen nicht von *Reduktion*, sondern von *Einsparungen* bzw. (*ein*)*sparen* in Bezug auf die WERTSCHÖPFUNGSKETTE sprechen. Diese Formen drücken aus, dass (schädliche) OBJEKTE (EMISSIONEN, KOSTEN) noch gar nicht vorhanden sind:

Mit Hilfe des neuen Produktionssystems können wir Pakete effizienter sortieren und transportieren und damit Kosten einsparen. (Deutsche Post GB 2010)

Neben den beiden genannten Konzeptualisierungen (negativ: ‚Reduktion‘; positiv: ‚Einsparung‘) offenbart sich schließlich eine dritte, neutrale Variante: Hierbei wird weder von einer Übersteigerung der kritischen Masse gesprochen (‚Reduktion‘), noch von einer möglichen Haushaltung (‚Einsparung‘), sondern ein ‚neutrales Gleichgewicht‘ evoziert. Dieses wird auf der sprachlichen Oberfläche ausgedrückt durch *x-neutral*:

Auf dem Gelände des Volkswagen Werks in Emden ist 2010 die leistungstärkste Windkraftanlage der Welt ans Netz gegangen. Sie steigert den Anteil regenerativ erzeugter Energie am Standort Emden und ist damit für das norddeutsche Werk ein weiterer Schritt auf dem Weg zur CO<sub>2</sub>-neutralen Fabrik. (VW GB 2010)<sup>237</sup>

---

<sup>236</sup> Ähnliches findet sich auch bei K+S in lexikalischer Variation (*halbieren*): „Die derzeit anfallenden Salzabwassermengen unseres Kaliwerks Werra wollen wir im Rahmen unseres Integrierten Maßnahmenkonzepts bis spätestens zum Jahr 2015 halbieren.“ (K+S GB 2010).



Das Kapitel WERTSCHÖPFUNGSKETTE verdeutlichte demzufolge den Nachvollzug der WERTSCHÖPFUNG für Anspruchsgruppen (Rezipienten). Ein „haptischer“ Bezug zum UNTERNEHMEN und dessen Zustandekommen wurde damit hergestellt. Bei der WERTSCHÖPFUNGSKETTE zeigte sich durch die aufgeführte kleinteilige Zerlegung in Konzeptattribute (z.B. ‚Gesamtheit‘, ‚Optimierung‘) außerdem, dass dieser Sachverhalt von Unternehmen oft fachsprachlich-technizistisch konstruiert wird, sodass dessen Bedeutung manchen Rezipienten schwer zugänglich sein mag (vgl. Kläßen 1999, 181).

## 1.2.8 ANSPRUCHSGRUPPEN/SOZIALE OBJEKTE

### 1.2.8.1 KUNDEN

Laut Stach/Held (2009, 19) werden in 73% der *Leitbilder* KUNDEN<sup>238</sup> thematisiert – diese scheinen somit ein wichtiger Bestandteil der Darstellung von UNTERNEHMENSIDENTITÄT zu sein. Auch in der vorliegenden Untersuchung findet sich *Kunden* als *Keyword* sowie Hochfrequenzwort unter den vorderen Rängen wieder (*Keyword*-Rang 9; Frequenz 2.082x). DEUTSCHE POST, BASF, VW und HENKEL nutzen den Ausdruck dabei am häufigsten. *Kunde\** taucht daneben oftmals unter den WERTEN eines Unternehmens<sup>239</sup> auf. Im folgenden Beleg erschafft HENKEL den Neologismus *Kunden-Wert*:

Bei allem, was wir tun, erinnert uns der Kunden-Wert daran, dass unsere Kunden in der Industrie, im Handel und im Handwerk nicht nur unsere Produkte, Technologien und Dienstleistungen kaufen, sondern darüber hinaus auch unsere Partner sind. (Henkel GB 2010)

Auf der lexikalischen Ebene finden sich, neben dem Ausdruck *Kunde* und dem Plural *Kunden*, ebenso andere Lexikalisierungen, die auch differente Perspektivierungen ausdrücken. MERCK unterscheidet etwa zwischen *Kunden* und *Endverbraucher*; ADIDAS nutzt durchgängig *Konsumenten*; BEIERSDORF spricht nur von *Verbraucher*:

Wir orientieren uns an unseren Konsumenten. (Adidas GB 2010/Corporate Mission Statement)

Mit über 125 Jahren Erfahrung und modernsten biotechnologischen Methoden entwickeln wir wirkungsvolle kosmetische Lösungen für unsere Verbraucher. (BDF Unser Profil)

HENKEL dagegen verwendet klare terminologische Differenzierungen:

Um die besten Produkte, die höchste Qualität und hervorragenden Service zu gewährleisten, müssen wir Kunden und Konsumenten besser verstehen, als es unsere Wettbewerber tun. (Henkel Vision und Werte)

---

<sup>237</sup> Bei DAIMLER findet sich das ‚neutrale Gleichgewicht‘ hin zur ‚Freiheit‘ gesteigert, wenn redundant die *emissionsfreie Mobilität* konstatiert wird.

<sup>238</sup> Nach Stach/Held (2009, 10) kommt mindestens eines der folgenden Themen in 89% der *Leitbilder* vor: ›Kunde‹ (73%), ›Gesellschaft‹ (41%) und ›Umwelt‹ (37,5%).

<sup>239</sup> Aus betriebswirtschaftlicher Sicht hat der Kunde auch einen monetären Wert für das Unternehmen. Dieser *Customer Equity* besteht in der Summe der diskontierten erwarteten Einnahmen (vgl. Schmid/Lyczek 2008, 45). Auch sonst hat das Unternehmen natürlich Interesse an einer positiven Einstellung des Kunden gegenüber desselben, da sich diese indirekt werthaltig für das Unternehmen auswirken kann, z.B. durch Weiterempfehlung an andere potentielle Kunden etc.

Ebenso DEUTSCHE BÖRSE arbeitet mit einem großen Kohyponymfeld und kann daher treffgenau (in Anlehnung an fachterminologische Gepflogenheiten) referieren, indem zwischen den Ausdrücken *Kunden*, *Finanzmarktteilnehmer*, *Privatanleger*, *Käufer*, *Verkäufer*, *Händler*, (*nationale/internationale*) *Unternehmen*, *Handelsteilnehmer*, *Besitzer*, *handelnden Parteien*, *etablierten Emittenten*, *Anlageberater* und *Portfoliomanager*, *Händler* und *Broker* unterschieden wird, die letztendlich alle KUNDEN des Unternehmens sind.<sup>240</sup> Teilweise markieren Unternehmen ihre ›Kundengruppen‹ explizit sprachlich und stellen Hierarchien auf (→ 8.5.2):

Die Kunden von Fresenius Medical Care im Produktgeschäft sind hauptsächlich Dialysekliniken und Krankenhäuser. (Fresenius GB 2010)

Unser Strom- und Gasvertrieb wird seit dem vergangenen Jahr für alle Kundengruppen – vom industriellen Großkunden bis zum Privathaushalt – von der in München ansässigen Gesellschaft E.ON Vertrieb Deutschland gesteuert. (E.ON Cleaner and better energy)

Neben den Verweisen auf ›Kundengruppen‹ (*Kundengruppen*, *Kundenbasis*, *Kundenvielfalt*) werden als Komposita mit *Kunden*\* am häufigsten *Kundenzufriedenheit* und *Kundenorientierung* genannt. *Kundenorientierung* zeigt das Konzept ›Kundenzentrierung‹ ‚räumlich‘ der Unternehmen an und wird ebenfalls oftmals unter den WERTEN (→ 9.2.5.1) aufgeführt, indem die sprachliche Realisierung mittels Sachverhaltsfestsetzungsversuchen erfolgt:

Kundenorientierung | „Größtmöglicher Nutzen für den Kunden“ (HeidelbergCement Unser Unternehmensleitbild)

Grafische Fettsetzungen heben die große Bedeutung von KUNDENORIENTIERUNG nochmals hervor:

**Kundenorientierung**. Wir arbeiten täglich daran, unsere Kunden zufriedenzustellen und ihnen maßgeschneiderte Lösungen zu liefern. Unsere Kundenorientierung spiegelt sich in unseren Geschäftsabläufen und Organisationsstrukturen wider. Zu unseren Lieferanten wollen wir möglichst langfristige Beziehungen aufbauen, die beiden Seiten nachhaltig nutzen. (E.ON Unser Verhalten)<sup>241</sup>

Weitere Komposita wie *Kunden-* und *Verbrauchernähe* beziehen sich ebenso auf ›Kundenzentrierung‹ ‚räumlich‘. Die hohe Frequenz von *Kundenzufriedenheit* verweist darüber auf das Konzept ›Kundenzentrierung‹ ‚emotional‘:

Engagement für Kunden und Gesellschaft. Kundenzufriedenheit steht für uns an höchster Stelle. (Daimler Unternehmensinformationen 2010)

Neben dem Ausdruck *Kundenzufriedenheit* beziehen sich die Komposita *Kundenbedürfnisse*, *-wünsche*, *-erwartungen* und *-ziele* aus Kundenperspektive auf die ›Kundenemotionen‹, die

---

<sup>240</sup> Natürlich muss man bei diesen Bezeichnungen (und damit auch Perspektivierungen) zwischen den verschiedenen Branchen sowie zwischen *B-to-B*-Unternehmen und *B-to-C*-Unternehmen unterscheiden. Die Auswertung legt nahe, dass Letzere (z.B. ADIDAS) häufiger *Konsumenten/Verbraucher* als Spezifikation nutzen, während Erstere (z.B. BASF) generisch von *Kunden* sprechen und diese nicht explizit als ‚Geschäftskunden‘ spezifizieren. Unternehmen, die in beiden Bereichen tätig sind (z.B. HENKEL), nutzen auch beide Ausdrücke.

<sup>241</sup> Vgl. dazu auch die Partizipien *kundenorientiert*\* und *kundenzentrisch*\*. Letzteres Adjektiv wird auch fachsprachlich festgesetzt: „Vorreiter für den sogenannten kundenzentrischen Ansatz ist die Vertriebslinie Real.“ (Metro GB 2010).

Unternehmen kennen und bedienen möchten.<sup>242</sup> Besonders der Ausdruck *Kundenbedürfnisse* wird dabei dominant herausgegriffen. Als *Bedürfnis* bezeichnen Schmid/Lyczek „das mit einem Mangelerlebnis und dem Streben nach dessen Überwindung einhergehende Gefühl“ (Schmid/Lyczek 2008, 49). Unternehmen konzeptualisieren sich somit als notwendige ›Kundenbedürfnisüberwinder‹ (in physischer, psychischer und sozialer Hinsicht):

Wir richten unser Prozess- und Produktprofil konsequent an den heutigen und sich für die Zukunft abzeichnenden Kundenbedürfnissen und ihrem Nachfrageverhalten aus. (Lufthansa GB 2010)

Dieser Beleg suggeriert, dass PRODUKTE von LUFTHANSA als LÖSUNGEN für KUNDENBEDÜRFNISSE<sup>243</sup> (z.B. Sicherheit, Stabilität) existieren, wodurch auf das Konzept ›Produktnutzen‹ (→ 9.2.7.1) rückverwiesen wird. In Folge können Unternehmen auch von einem spezifischen ›Kundennutzen‹ durch *Kundennutzen* oder *Kundenmehrwert* sprechen:

Linde entwickelt Technologien und Produkte, die Kundennutzen mit einem Beitrag zur nachhaltigen Entwicklung verbinden. (Linde GB 2010)

Bei der Entwicklung zukunftsweisender Lösungen orientieren wir uns an Sicherheit und Kundenmehrwert. (Lufthansa GB 2010)

Dass es auch einen Austausch zwischen den UNTERNEHMEN und KUNDEN gibt, offenbaren *Kundenservice*, *Kundenbetreuung*<sup>244</sup> sowie *Kundenbeziehung*\* (›Kundeninteraktion‹), wobei das UNTERNEHMEN in den Belegen meist an der Position des Agens auftritt:

Munich Re legt zudem großen Wert auf Kundenservice, der regelmäßig mit Bestnoten bewertet wird. (Munich Re Über Munich Re)

Verlässlich in der Versorgung, innovativ bei der Weiter- und Neuentwicklung von Verfahren und Prozessen – auf dieser Grundlage pflegt Linde Kundenbeziehungen, die über Jahrzehnte währen. (Linde GB 2010)

›Kundeninteraktion‹ wird dabei (neben den Attributen ‚Festigung‘ und ‚Pflege‘) dominant mit folgenden Attributen aufgerufen, die sich in Syntagmen offenbaren (‚Vertrauen‘, ‚Nähe/Intimität‘ und ‚Langfristigkeit/Dauerhaftigkeit‘):

Dank der umfassenden Produktpalette und der langjährigen Erfahrungen kann Fresenius weltweit enge Beziehungen zu seinen Kunden aufbauen und aufrechterhalten. (Fresenius GB 2010)

Beziehungen zu unseren Kunden sind langfristig angelegt, wir verstehen uns als Berater und Coach in einer Person, in einem Team. (ThyssenKrupp Unsere Werte)

Das Konzept ›Kundeninteraktion‹ richtet sich dennoch an der Unternehmensperspektive aus, was indirekt durch Komposita wie *Kundenloyalität*\*<sup>245</sup>, *Kundentreue*<sup>246</sup> und *Kundenbindung*<sup>247</sup> ausgedrückt wird.

---

<sup>242</sup> Vgl. dazu: „Von der Entwicklung über den Service bis hin zur umweltgerechten Altfahrzeugverwertung berücksichtigen wir Kundenwünsche über den gesamten Produktlebenszyklus hinweg.“ (Daimler Unternehmensinformationen 2010).

<sup>243</sup> Auch die Partizipialkomposita *kundengerecht*\* und *kundenbezogen*\* referieren hierauf: „Die hohe Bedeutung der Bereiche kundenbezogene Entwicklung und Beratung sowie Technik und Innovation spiegelt sich nicht nur in den Kosten, sondern auch in der Zahl der Mitarbeiter wider.“ (HeidelbergCement GB 2010).

<sup>244</sup> Vgl. dazu: „Die professionelle und globale Vertriebsstruktur sorgt für eine lösungsorientierte, verantwortungsvolle Kundenbetreuung weltweit.“ (Daimler Das Unternehmen 2011).

Beleuchtet man die syntagmatische Ebene, fällt auf, dass *Kunde\** (sowie die oben aufgeführten partiellen Synonyme und Kohyponyme) mit Adjektiven attribuiert wird, die ebenfalls eine Einteilung aus Unternehmensperspektive (›Kundenart‹) ausdrücken. Als Attribute finden sich dabei solche Ordnungen nach:

- ‚Wertigkeit‘;

Als Folge der Finanzkrise 2010 ist eine neue Kapitalmarktlandschaft entstanden. Diese Landschaft ist vor allem geprägt durch eine höhere Regulierungsdichte, die bei den wichtigsten Kunden der Gruppe Deutsche Börse, den Banken, zu umfangreichen Änderungen ihrer Geschäftsmodelle führt. (Deutsche Börse Standpunkte)<sup>248</sup>

- ‚Branche‘;

Unser operatives Geschäft verantworten die vier Vertriebslinien Metro Cash & Carry, Real, Media Markt und Saturn sowie Galeria Kaufhof. Sie bieten privaten und gewerblichen Kunden in 33 Ländern ein umfassendes Angebot an Produkten und Dienstleistungen, das auf deren spezifische Einkaufsgewohnheiten zugeschnitten ist. (Metro GB 2010)

- ‚Lebensverhältnisse in Bezug auf Kaufkraft/Vorlieben‘;

Der Münchener Marienplatz ist das urbane Zentrum der Stadt. Für trendbewusste Kunden hat Galeria Kaufhof dort im September 2010 ein innovatives, individuelles Konzept umgesetzt, das genau auf die Anforderungen des Standorts zugeschnitten ist: U.Style Fashion. (Metro GB 2010)

- ‚emotionale Zustände‘;

Unser Ziel sind zufriedene Kunden, die langfristig bei uns bleiben, möglicherweise mehr als ein Produkt von uns beziehen und uns im Familien- und Bekanntenkreis weiterempfehlen. (RWE GB 2010)

Häufiger als adjektivische Attributionen manifestieren sich auf der Syntagmenebene jedoch genitivische Anschlüsse (*X unserer/der Kunden*). Diese Konstruktionen transportieren das Konzept ›Kundenansprüche‹, was durch *\*anforderung\*/Anspruch/Ansprüche der/unserer Kunden* versprachlicht wird:

Kundenorientierung beginnt für uns mit aufmerksamem Zuhören. So erkennen wir frühzeitig die Anforderungen unserer Kunden und wissen, was sie von uns erwarten. (MAN Unternehmensleitbild)

Der MQB erfüllt den steigenden Anspruch der Kunden an eine Vielfalt bei Modellen, Ausstattung und Design. (VW GB 2010)

In der Belegdurchsicht finden sich regelhaft im Kontext dieser Konstruktionen die Partizipien *steigende\** bzw. *ändernde\**.<sup>249</sup> Damit wird das Konzept ›Unternehmen als reaktive Instanz der

---

<sup>245</sup> Vgl. dazu: „Den Kundenloyalitätsindex erheben wir seit 2010 zunächst für Deutschland. Bei unseren Stromkunden bewegen wir uns mit einem Wert von 71 im Jahr 2010 gegenwärtig stabil im Mittelfeld des Wettbewerbs.“ (RWE Unsere Verantwortung 2010).

<sup>246</sup> Vgl. dazu: „In den europäischen Kernmärkten zum Beispiel hält die Marke Volkswagen Pkw die Kundentreue schon mehrere Jahre auf hohem Niveau.“ (VW GB 2010).

<sup>247</sup> Vgl. dazu: „Um uns von anderen Wettbewerbern zu unterscheiden, setzen wir verstärkt auf Kundenbindung durch Servicequalität.“ (Deutsche Post GB 2010).

<sup>248</sup> Vgl. dazu: „Ziel ist es, mit unseren Top-Kunden organisch eineinhalbmal so schnell zu wachsen wie Henkel insgesamt.“ (Henkel GB 2010).

<sup>249</sup> Vgl. dazu auch: „Vor dem Hintergrund steigender Kundenanforderungen lag – und liegt auch zukünftig – ein Schwerpunkt unserer Vertriebsaktivitäten auf der Verbesserung der Kundenzufriedenheit.“ (VW GB 2010); „Als eine wesentliche Komponente unserer Initiative „Focus 2010“ wollen wir die Servicequalität kontinuierlich verbessern. Dazu verfolgen wir die sich ständig ändernden Kundenanforderungen und kontrollieren unsere Leistungen, zum Beispiel durch „Mystery Shopper“.“ (Deutsche Post GB 2010).

Anspruchsbefriedigung der Kunden< zugrunde gelegt. Lexikalische Fügungen mit *Erwartungen*<sup>250</sup> sowie *erwarten*, in denen KUNDEN satzsemantisch zum Agens werden, bestätigen diesen Befund:

Unsere Kundinnen und Kunden erwarten sichere, komfortable und leistungsfähige Fahrzeuge, die gleichzeitig immer sparsamer und umweltverträglicher sein müssen. (Daimler Das Unternehmen 2011)

Weitaus direkter wirken nochmals Varianten mit den Verben *verlangen* und *fordern*:

Dementsprechend verlangen Kunden nach integrierten Lösungen, über die sie Zugriff auf eine breite Palette an Dienstleistungen und Transportmodi erhalten und die ihre Lieferkette absichern können. (Deutsche Post GB 2010)

Die Kunden fordern von uns zunehmend ein nachhaltiges Angebot. (Metro GB 2010)

Die Syntagmen *Bedürfnisse/Wünsche der Kunden* sind dagegen weniger direkte Formulierungen, da sie keine direkte Deontik an das Unternehmen herantragen:

Wir denken voraus und gehen auf die Wünsche und Bedürfnisse unserer Kunden ein, indem wir höchsten Kundennutzen, ausgezeichnete Qualität sowie innovative Marken und Technologien bieten. (Henkel Vision und Werte)

Isaksson/Jørgensen (2010, 228) argumentieren, dass Unternehmen diese KUNDENBEDÜRFNISSE jedoch erst selbst (sprachlich) schaffen, um ihre Produkte zu verkaufen.

KUNDEN werden jedoch gleichzeitig als Nutznießer des Unternehmenshandelns konstituiert. Der häufige Einsatz der Präpositionalphrase *für X*, das den durch das Verb bezeichneten Benefaktiv (Nutznießer) einer sprachlichen Handlung markiert (vgl. Bußmann 2002, 121), bestätigt diese These (>Kunde als Nutznießer<):

Unsere Energie ist klimaschonend, attraktiv für unsere Kunden und steigert zugleich den Wert unseres Unternehmens. Das schaffen wir durch den Einsatz neuester Technologien, die wir besser beherrschen als andere. Und aus denen wir bessere Produkte und Dienstleistungen für unsere Kunden machen. (E.ON GB 2010)

In syntaktischer Voranstellung wird dieses Konzept nochmals unterstrichen:

Für unsere Privat- und Geschäftskunden sind wir immer und überall verfügbar. (Deutsche Post GB 2010)

Betrachtet man die Satzebene der Beispiele, zeigen Unternehmen die >Kundenhandlung< ‚Kundenbedürfnisachtung‘ bzw. ‚Kundenbedürfniserfüllung‘ an:

Wir haben auf die individuellen Bedürfnisse der asiatischen Verbraucher schon früh reagiert und Bereits im Jahr 2005 ein Asien-Labor eingerichtet, das Produkte für die lokalen Absatzgebiete entwickelt. (BDF GB 2010)

Auffallend ist zudem, dass Unternehmen dabei nicht nur nach ‚Kundenbedürfniserfüllung‘ streben, sondern – in Kombination mit den Ausdrücken *Erwartungen*, *erfüllen/übertreffen* (und Superlativen) – das Attribut ‚Kundenbedürfnisübertreffung‘ dominant setzen:

Wir wollen die Erwartungen der Konsumenten nicht nur erfüllen, sondern übertreffen und ihnen damit höchsten Nutzen bieten. (Adidas GB 2010/Corporate Mission Statement)

---

<sup>250</sup> Vgl. dazu: „Die Mitarbeiter sollen die Erwartungen sowohl der internen als auch der externen Kunden erfüllen und die Qualität der Daimler Produkte und Leistungen ständig verbessern.“ (Daimler Verhaltensrichtlinien).

VW unterstreicht diesen hohen Absolutheitsanspruch im Kontext mit *Maximum*:

Wir wollen die Kunden mit einem Maximum an Dienstleistungsbewusstsein, verbunden mit unserem hohen Qualitätsanspruch, überzeugen. Deshalb verstehen wir ihre individuellen Wünsche und Bedürfnisse stets als Handlungsvorgaben und möchten die an uns gestellten Erwartungen nicht nur erfüllen, sondern übertreffen. (VW GB 2010)

„Kundenbedürfnisübertreffung“ setzt aber voraus, dass Unternehmen die KUNDENBEDÜRFNISSE bereits kennen (*wissen, erkennen*)<sup>251</sup>, bevor sie überhaupt geäußert wurden:

Wir wissen, was unsere Verbraucher bewegt [...]. Gleichzeitig denken wir weiter und greifen mit unseren Innovationen den Wünschen der Verbraucher vor. (BDF Unser Profil)

Im Dialog mit unseren weltweiten Partnern stellen wir uns aufmerksam auf Kundenerwartungen und Markttrends ein, um auch unausgesprochene Erwartungen zu erkennen und darauf einzugehen. (VW GB 2010)

Schließlich findet sich auch die ›Kundenhandlung‹ ‚Kundenverständnis‘:<sup>252</sup>

Wir verstehen die Herausforderungen unserer Kunden und setzen sie in den Gesamtkontext. (ThyssenKrupp Unsere Werte)

Beleuchtet man auf der Satzebene weitere Verben, die im Kontext von *Kunden\** (sowie dem Synonym- und Kohyponymfeld) auftauchen, zeigen sich vermehrt Verben aus dem Wortfeld ›Unterstützung‹, z.B. *unterstützen* oder *helfen*. Durch diese präsentieren sich Unternehmen (v.a. SAP und SIEMENS) mit der ›Kundenhandlung‹ ‚Kundenunterstützung‘. Oft wird diese nach dem syntaktischen Muster *wir* + Verb + *unsere\* Kunden* realisiert, sodass die KUNDEN wiederum als Benefaktiv der Handlung, also der ‚Unterstützung‘, fungieren:

Wir unterstützen unsere Kunden bei der Suche nach perfekter Qualität und bieten ihnen Lösungen, die ihre Erwartungen übertreffen. (Siemens Unsere Werte)

Über ein flächendeckendes Distributionsnetzwerk helfen wir unseren Kunden mit hochwertigen Lösungen, ihre Wettbewerbsfähigkeit zu stärken. (Henkel GB 2010)

Durch solche Formulierungen wird im gleichen Schritt auch eine moralische VERPFLICHTUNG gegenüber den KUNDEN konstruiert, die folgende Aussagen noch stärker verdeutlichen:

Kommt es tatsächlich einmal zu lokalen Lieferengpässen, dann nutzen wir die Synergien unserer weltweiten Salzstandorte, die sich untereinander nach Kräften unter die Arme greifen. Das sind wir als der weltweit größte Salzproduzent unseren Kunden schuldig! (K+S GB 2010)

Wir lassen die Kunden nie im Stich [...]. (Henkel GB 2010)

Diese VERPFLICHTUNG wird auch kommissiv mittels Ausdrücken wie *\*versprechen* unterstrichen:

---

<sup>251</sup> Vgl. dazu auch die KOPFSICHT-Metaphorik: „Damit wir schon heute wissen, was die Anspruchsgruppen morgen wünschen, orientiert sich das Unternehmen bei der Produktentwicklung an „Consumer Insights“. Sie werden von Beiersdorf Mitarbeitern auf der ganzen Welt ermittelt und beschreiben die Erwartungen der Verbraucher an zeitgemäße Haut- und Schönheitspflege.“ (BDF Imagebroschüre).

<sup>252</sup> Auffallend ist, dass die ›Messbarkeit des Kundenbefindens‹ dabei integriert wird (z.B. *Kunden-zufriedenheitsstudien, Kundenbarometer, Kundenloyalitätsindex*): „Regelmäßig durchgeführte Kundenzufriedenheitsstudien sowie das direkte Kundenfeedback gegenüber Vertriebsmitarbeitern und den dezentralen Kundendiensten ergeben ein genaues Bild der Kundenwünsche.“ (Lufthansa GB 2010); „Der „Kundenmonitor Deutschland“, die größte Zufriedenheitsstudie für Privatkunden in Deutschland, befragt unsere Filialkunden jährlich danach, wie zufrieden sie mit unseren Leistungen sind.“ (Deutsche Post GB 2010).



Unser Versprechen: Kundenorientierte Lösungen: unterschiedliche Kundenbedürfnisse verstehen, Mehrwert bieten, Vertrauen bilden und anhaltende Partnerschaften aufbauen. (Deutsche Bank Leitbild und Marke)

Die VERPFLICHTUNG wird gefestigt durch Aussagen, die eine Perspektivierung aus Kundensicht zulassen, d.h. KUNDEN *verlassen sich* bzw. *bauen auf* ein UNTERNEHMEN:

Von der Planung über Beschaffung, Produktion, Lagerung und Auslieferung bis hin zu Retourenlogistik und Kundendienst verlassen sich unsere Kunden darauf, dass die Logistikabläufe stimmen. (Deutsche Post GB 2010)

Unsere Pkw stehen für Komfort, Sicherheit, Fahrspaß und Umweltverträglichkeit – darauf können unsere Kundinnen und Kunden auch in Zukunft bauen. (Daimler Das Unternehmen 2011)

Daneben finden sich jedoch auch neutralere Varianten, in denen keine ‚Unterstützung‘, sondern nur ein ‚Angebot‘ (*bieten*) offenbar wird:

Unseren Millionen Kunden bieten wir Produkte und Services rund um das vernetzte Leben und Arbeiten an. (Telekom GB 2010)<sup>253</sup>

METRO hebt sich durch die Nutzung von *offerieren* lexikalisch von diesem Muster ab und schafft sich sprachliche Alleinstellung:

Wir bündeln die Leistungsstärken unserer Vertriebslinien und Querschnittsgesellschaften und schöpfen Synergien konzernweit aus. Dadurch verfügen wir über die strategischen Fähigkeiten und das wirtschaftliche Potenzial, unsere Wettbewerbsfähigkeit kontinuierlich zu steigern und weltweit unseren Kunden dauerhaft ein vielfältiges und qualitativ anspruchsvolles Angebot zu attraktiven Preisen zu offerieren. (Metro Corporate Principles)

Während die ›Kundenhandlung‹ bisher aus der Unternehmensperspektive versprachlicht und der KUNDE damit zum Betroffenen bzw. Benefaktiv einer Handlung wurde, was Stockinger (1998, 33) als BEUTE ansieht, wird eine Perspektivenänderung vorgenommen, wenn der KUNDE selbst zum handelnden Agens wird:

Wir liefern an unsere Kunden, die Hersteller von Invertern zur Einspeisung der Solarenergie ins Netz, IGBT-, MOSFET- und SIC-Komponenten. Unsere Kunden – in diesem Sektor zum Beispiel SMA Solar Technology – erreichen damit Wirkungsgrade auf Weltrekordniveau. (Infineon GB 2010)

Metareflektierend bezieht sich TELEKOM durch *Kundensicht* auf diese Perspektivenänderung<sup>254</sup>:

Schließlich sind unsere Produkte miteinander vernetzt. Wir betrachten und entwickeln sie aus Kundensicht. Weil wir finden, dass jeder Kunde seinen ganz persönlichen digitalen Lebensstil gestalten können sollte. (Telekom GB 2010)

Auch E.ON beschreibt den Rollentausch von UNTERNEHMEN und KUNDE:

Unsere Kunden: vom Konsumenten zum Produzenten. Von jeher floss Strom nur in eine Richtung: von zentralen Kraftwerken zum Verbraucher. Neuerdings fließt er immer mehr auch in die andere Richtung. Denn kleine, privat betriebene Kraft- Wärme-Kopplungsanlagen (KWK-Anlagen) werden immer wirtschaftlicher und Fotovoltaikanlagen immer zahlreicher. Die über den Eigenbedarf hinausgehende Energie speisen diese Anlagen in das Stromnetz ein. Das macht Tausende unserer Kunden zu Energieproduzenten. (E.ON Cleaner and better energy)

---

<sup>253</sup> Vgl. auch hier die unterschiedlichen faktizitätsbezogenen Realisierungen: „Wir wollen Patienten und Kunden weltweit die bestmögliche Produkt- und Behandlungsqualität bieten.“ (FMC GB 2010).

<sup>254</sup> Reins (2006, 62) postuliert, dass Unternehmenstexte per se kunden- und nicht unternehmens- oder produktorientiert sein sollten. Auch Brünner (2009, 165) bezieht sich auf die Maxime *Vom Kunden her argumentieren!* für ein gutes Verkaufsgespräch.

MERCK spitzt dieses Rollenverständnis ebenso zu, indem sich das UNTERNEHMEN *in den Dienst* der KUNDEN stellt:

Hier stellen wir unser ganzes langjähriges Knowhow in den Dienst unserer Kunden. Gemeinsam mit ihnen entwickeln wir innovative Produkte und Lösungen, die sich im Markt bewähren. (Merck Einzigartig – Der Merck Weg)

Der KUNDE wird somit der RICHTER über das UNTERNEHMEN, was ausdrucksseitig durch die Konstruktionen *Gunst der Kunden/Verbraucher*<sup>255</sup> unterlegt wird. Der KUNDE ist in dieser Perspektivierung folglich nicht BEUTE, sondern RICHTER (vgl. Stockinger 1998, 33) und bildet eine Bewertungsinstanz, die über das UNTERNEHMEN urteilt:

Unsere Kunden entscheiden über den Erfolg unseres Unternehmens. (BMW GB 2010)

Diese Unternehmensbewertung durch KUNDEN erscheint besonders für DEUTSCHE POST essentiell (*Kunden [...] gelobt, Kunden honorieren*):

Ausdrücklich haben uns die Kunden für unseren Einsatz gelobt, als die Aschewolke des isländischen Vulkans Eyjafjallajökull den Flugbetrieb empfindlich beeinträchtigte. (Deutsche Post GB 2010)

DHL gilt als der zuverlässigste Anbieter internationaler Sendungen zwischen Nordamerika und Asien. Neue wie bestehende Kunden honorieren dieses mit großer Loyalität. (Deutsche Post GB 2010)<sup>256</sup>

Als dritte Rollenperspektive, die durch sprachliche Muster im Korpus evident wird, erscheint der KUNDE als MITSPIELER (vgl. Stockinger 1998, 33), was durch die Häufung des stammbildenden Morphems *\*partner\** im Kontext von *Kunde\** deutlich wird:

Durch die partnerschaftliche Zusammenarbeit mit unseren Kunden insbesondere in der frühen Phase der Produktentwicklung ermöglichen wir ihnen die Herstellung innovativer und nachhaltiger Produkte. (Henkel GB 2010)

Metareflektierend macht HENKEL diese Rolle nochmals deutlich (durch *unsere Partner*):

Die Handelskunden sind zugleich unsere Partner und Teil unseres Geschäfts. Ihre Erwartungen gilt es bestmöglich zu erfüllen. (Henkel GB 2010)

Auch die Adjektive *gemeinsam, zusammen\** sowie die Präposition *mit* verweisen auf KUNDE als MITSPIELER:

Die langfristige und vertrauensvolle Zusammenarbeit mit unseren Kunden ist eine wichtige Basis für unser nachhaltiges Wachstum. (Fresenius GB 2010)

UNTERNEHMEN und KUNDEN erscheinen in diesen Aussagen als gleichrangige PARTNER, indem sich das UNTERNEHMEN (zumindest kommunikativ) auf dieselbe Ebene des KUNDEN stellt. Dies demonstriert Zusammenhalt (vgl. Brünner 2009, 165).<sup>257</sup> Die exponierte Stellung von KUNDEN wird auch explizit sprachlich mittels räumlicher Metaphorik auf der Satzebene

---

<sup>255</sup> Vgl. dazu: „Im Wettbewerb um die Gunst der Kunden überzeugen wir durch unsere Produkte und Leistungen.“ (BMW Verhaltenskodex); „Um unter diesen Rahmenbedingungen Wachstum zu erzielen, konkurrieren Handelsunternehmen immer stärker um die Gunst der Verbraucher.“ (Metro GB 2010).

<sup>256</sup> Vgl. dazu auch: „Sie [die Kunden, S.B.] bewerten unsere Leistung danach, ob ihre Sendungen schnell, zuverlässig und unbeschädigt ankommen.“ (Deutsche Post GB 2010).

<sup>257</sup> Das Partizip Perfekt *bevorzugt\** validiert die Perspektivierung des UNTERNEHMENS als von ‚außen‘: „Wir sind der bevorzugte Partner der Kunden.“ (BASF Vision.Grundwerte.Leitlinien).

ausgedrückt (*Kunde [...] im Zentrum/im Mittelpunkt*).<sup>258</sup>

Kundenfokus – Der Kunde steht im Mittelpunkt all unserer Aktivitäten. Wir orientieren uns kompromisslos an seinen Zielen und Wünschen. (Deutsche Bank Leitbild und Marke)

Bei all unserem Handeln steht der Kunde im Zentrum, und die Ergebnisse unseres Handelns müssen unter dem Blickwinkel des Kundennutzens bewertet werden. (BMW GB 2010)

Aus dieser ›Kundenzentrierung‹ leiten die Unternehmen wiederum kausal ihre eigene Seinsberechtigung ab, insbesondere in Bezug auf ERFOLG und WACHSTUM:

Wir messen unseren Erfolg am Erfolg unserer Kunden. (BASF GB 2010)<sup>259</sup>

Letztlich erstellt HEIDELBERGCEMENT auf der Textebene eine eigene *Kundenphilosophie*, um die Wichtigkeit von KUNDEN anzuzeigen:

Die Heidelberger Kundenphilosophie. Wir bauen auf zufriedene Kunden. Weil wir mit ihrem Erfolg wachsen. (HeidelbergCement Corporate Mission)

Die Analysen in diesem Kapitel offenbarten damit die essentielle Rolle der KUNDEN als SOZIALE OBJEKTE des UNTERNEHMENS, das in einem ökonomischen System von KUNDEN abhängig ist und diese gleichzeitig für seine Selbstkonstruktion (UNTERNEHMENSIDENTITÄT) braucht. Drei Perspektivierungen wurden diesbezüglich deutlich: Das UNTERNEHMEN unterwirft sich einerseits den KUNDEN und erkennt dessen Rechte an, denen sich das UNTERNEHMEN verpflichtet, d.h. die illokutive Kraft des Sprachhandelns (*\*versprechen*) war dabei stark vertreten. Der Kundenerfolg wird zur Handlungsmaxime des UNTERNEHMENS und die Argumentation aus dem Kundennutzen (*Kundennutzen/\*interesse*, ‚Kundenbedürfnisübertreffung‘) heraus geführt (RICHTER). Auf der konnotativen Ebene wurde der KUNDE jedoch gleichzeitig als steuerbares Wesen konstruiert (BEUTE). Als drittes waren UNTERNEHMEN und KUNDE gleichberechtigt und wurden MITSPIELER innerhalb des ökonomischen Systems.

### 1.2.8.2 MITARBEITER

MITARBEITER sind diejenigen SOZIALEN OBJEKTE, aufgrund derer ein UNTERNEHMEN überhaupt erst als soziales System entstehen und bestehen kann. Die hohe Bedeutung von MITARBEITER wird in den Repräsentationstexten durch den Status von *Mitarbeiter* als *Keyword* und Hochfrequenzwort unter den vorderen Rängen deutlich (*Keyword-Rang 7*; Frequenz 2.589x).<sup>260</sup> Weitere lexikalische Bezugnahmen auf MITARBEITER finden sich durch Kollektivsingulare (*Team, Belegschaft, Personal\** oder *Beschäftigte*). In Komposita taucht *Mitarbei-*

<sup>258</sup> Orientierungsmetaphern dienen ebenfalls dieser Funktion: „Die meisten unserer Kunden sind Organisationen kleiner und mittlerer Größe. Sie direkt und vor Ort zu betreuen ist uns eine Verpflichtung.“ (Siemens GB 2010).

<sup>259</sup> Auffallend ist in der Belegauswertung auch die Übernahme von ›Kundenziele‹ durch das Unternehmen: „Wir machen die Ziele unserer Kunden zu unseren Zielen.“ (MAN Unternehmensleitbild). Das KUNDENZIEL wird als vorrangig deklariert und das UNTERNEHMENSZIEL scheinbar nachgestellt: „Diese meist langjährige, vertrauensvolle Partnerschaft sichert unseren Kunden entscheidende Vorteile im Markt – und uns gute Geschäfte.“ (Merck Einzigartig – Der Merck Weg).

<sup>260</sup> Ebenfalls Gunnarsson (2010, 172) zeigt in seiner Untersuchung, dass alle untersuchten Unternehmen *Values* hatten, die sich auf MITARBEITER bezogen (*Mitarbeiter sind unser Erfolg* etc.).

ter\* – im Vergleich zu den bisher behandelten Sachverhalten – seltener auf (*Mitarbeiterorientierung*, *Mitarbeiterbindung*). Der Sachverhalt MITARBEITER wird dagegen vielmehr in Nominalphrasen mittels Adjektivattributen (*zufriedene Mitarbeiter*) und Genitivattributen (*Zufriedenheit der Mitarbeiter*) versprachlicht, wobei die Attributionen durch Adjektive (der Form *x Mitarbeiter*) überwiegen: Am häufigsten präsentiert sich dabei die possessivische Angabe *unsere\* + X*, was sich auch in Überschriften (*Unsere Mitarbeiter*) sowie im *Geschäftsbericht*, der meist ein eigenes Kapitel zu MITARBEITER aufführt, verdichtet:<sup>261</sup>

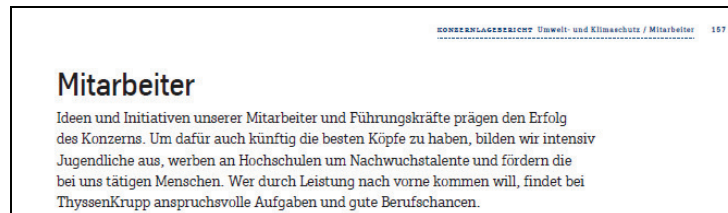

Abbildung 101 - ThyssenKrupp GB 2010

Neben der Besitzanzeige (*unsere\* + X*) beschreiben weitere syntagmatische Muster der Form *x Mitarbeiter* das Konzept ›Mitarbeiterart‹. Dessen Attribute sind:

- ‚engagiert‘;

Mit unseren engagierten Mitarbeitern, vorbildlicher Forschung und Entwicklung sowie innovativen Produkten arbeiten wir kontinuierlich daran, das Vertrauen unserer Verbraucher in unsere Marken weiter zu stärken. (BDF Imagebroschüre)

- ‚hochqualifiziert‘;

Der Erfolg unserer Forschungs- und Entwicklungsaktivitäten basiert auf den Fähigkeiten unserer hoch qualifizierten Mitarbeiter. (Henkel GB 2010)

- ‚kompetent‘;

Die Heidelberger Mitarbeiterpolitik. Wir bauen auf kompetente Mitarbeiter. Weil ihr Wissen uns weiterbringt. (HeidelbergCement Corporate Mission)

- ‚exzellent‘;

Exzellente Mitarbeiter in einem Hochleistungsunternehmen. (Infineon GB 2010)

- ‚loyal‘;

Loyale Linde Mitarbeiter. Durchschnittliche Betriebszugehörigkeit von Mitarbeitern der Linde Group in Jahren im Vergleich zu verschiedenen nationalen/regionalen Durchschnittswerten. (Linde GB 2010)

- ‚motiviert‘;

Wahrnehmung unserer Verantwortung als Arbeitgeber. Für ein Dienstleistungsunternehmen wie Lufthansa ist die Bedeutung motivierter Mitarbeiter ausgesprochen hoch, ebenso wie der Ausbau und das Wahren von Fachwissen. (Lufthansa GB 2010)

Neben diesen regelhaften Eigenschaftszuschreibungen an die MITARBEITER tauchen auch diskurstypische Evaluativa (*gute\*/beste\* + Mitarbeiter*) auf, die BEIERSDORF in einem Wortspiel einführt:

<sup>261</sup> Dadurch wird das Konzept ›Mitarbeiter gehören zum Unternehmen‹ dominant gesetzt.

Gute Mitarbeiter sichern den Erfolg von Beiersdorf. Und Beiersdorf sichert den Erfolg guter Mitarbeiter. (BDF Nachhaltigkeitsbericht 2010)

Die aufgeführten Eigenschaftszuschreibungen präsentieren sich auch in Begriffspaaren gemeinsam, wobei besonders *qualifiziert\** + *motiviert\** eine Bindungsaffinität zu haben scheinen.<sup>262</sup>

Qualifizierte und motivierte Mitarbeiter sind eine wichtige Voraussetzung für den nachhaltigen Erfolg von HeidelbergCement. (HeidelbergCement GB 2010)

Ebenso *\*qualifiziert\* + engagiert\** erscheinen verfestigt:

Infineon ist ein globales Hightech-Unternehmen mit hochqualifizierten und engagierten Mitarbeitern. (Infineon Unser Infineon Team)

METRO kombiniert schließlich vier Eigenschaftszuschreibungen, wobei *Mitarbeiter* in der Aussage durch *Belegschaft* wiederaufgenommen wird.

Die METRO GROUP richtet ihr unternehmerisches Handeln konsequent an den Bedürfnissen und Einkaufsgewohnheiten ihrer Kunden aus. Unseren Mitarbeitern kommt deshalb eine hohe Verantwortung zu: Sie kennen die Anforderungen von Verbrauchern und Gewerbetreibenden am besten und können individuell auf deren Erwartungen reagieren. Entsprechend legen wir großen Wert auf eine qualifizierte, motivierte, leistungsbereite und unternehmerisch denkende Belegschaft. (Metro GB 2010)

Es fällt bei den adjektivischen Zuschreibungen auf, dass es sich vor allem um eine Bewertung der ›Mitarbeiterleistung‹ aus Arbeitgebersicht (UNTERNEHMEN) handelt. Ebenso die Syntagmen mit dem Genitivattribut *X der/unserer Mitarbeiter* beziehen sich insbesondere auf ›Mitarbeiterleistung‹ (*Leistung/Engagement/Erfolg der/unserer Mitarbeiter*) (→ 9.2.3.1):

Als international agierender Konzern erleben wir Tag für Tag, dass nachhaltiges Wachstum zu großen Teilen auf dem Engagement unserer Mitarbeiter beruht. (K+S GB 2010)

Weitere regelhaft genutzte Syntagmen sind *Gesundheit/Sicherheit der/unserer Mitarbeiter* und *Verantwortung für/gegenüber x Mitarbeiter\** (s.u.). Die Syntagmen *Wissen/Kompetenz/Erfahrung\* der/unserer Mitarbeiter* schreiben MITARBEITERN darüber ein spezielles ›Mitarbeiterwissen‹ zu (→ 9.2.4.1):

Das Wissen und die Erfahrungen unserer Mitarbeiter sind unsere wichtigste Ressource. (MAN Unternehmensleitbild)

Wir fördern die persönliche und fachliche Kompetenz unserer Mitarbeiter. (K+S Grundwerte)<sup>263</sup>

Den MITARBEITERN wird durch solche Aussagen ein Status als EXPERTE zuteil, der lexikalisch durch *Experte\** oder *Spezialist\** (v.a. bei K+S) referiert wird (→ 8.2.3.5.1):

Jeder Mitarbeiter ist ein Spezialist für seine Aufgabe über oder unter Tage. (K+S GB 2010)

Ein neuralgischer Punkt ist dabei auch die Bewahrung von ›Mitarbeiterwissen‹ im Unternehmen, was bereits beim Sachverhalt WISSEN (→ 9.2.4.1) behandelt wurde. Gezielte ›Mitarbei-

---

<sup>262</sup> Vgl. dazu auch ‚motiviert + x‘: „Indem wir talentierte und motivierte Mitarbeiter gewinnen, fördern und an uns binden, unterstützen wir die beiden anderen Kernziele unserer Strategie – bevorzugter Anbieter zu werden und uns für Anleger noch attraktiver zu machen.“ (Deutsche Post GB 2010).

<sup>263</sup> Vgl. dazu auch MITARBEITER als *Ideengeber* und *Treiber des Fortschritts*: „Denn nicht zuletzt sind unsere Mitarbeiter Treiber des Fortschritts. Sie sind es, die Impulse für neue Ideen und Konzepte geben, diese testen und in die Praxis umsetzen.“ (Metro GB 2010). Vgl. dazu auch Kapitel WISSEN → dieser Anhang, 1.4.1.



terweiterbildung< soll das WISSEN der MITARBEITER zudem ‚fachlich‘ stärken:

Als einer der größten Arbeitgeber für medizinisches Personal weltweit spielt die Aus- und Weiterbildung von Dialysefachkräften für uns eine wichtige Rolle. (FMC GB 2010)

Schließlich zeigt sich auf der Syntagmenebene musterhaft die rechtsseitige Verbindung von *Mitarbeiter* mit (*höchste\**) *Wertschätzung\** (>Mitarbeiterwertschätzung<).<sup>264</sup>

Wir sind ein Unternehmen, dessen Mitarbeiter höchste Wertschätzung genießen. (Linde GB 2010)

So ist das Verb *schätzen* häufig in Kookkurrenz mit *Mitarbeiter\** anzutreffen:

Wir schätzen, fordern und fördern unsere Mitarbeiter. (Henkel Vision und Werte)

Wir schätzen die Kenntnisse und Beiträge unserer Kollegen. Wir unterstellen einander guten Willen. (E.ON Unser Verhalten)

Durch *Kollegen* im letzten Beleg wird zudem eine inklusive Perspektive gewählt, die Konzepte wie >Bekanntheit<, >Gemeinschaft< und >Vertrauen< mitaufruft. Hierzu dienen auch die (eher seltenen) Verweise auf die individuelle soziale Disposition der MITARBEITER:

Wir erreichen mit unserer Führung Kopf und Herz unserer Mitarbeiter und zeigen unser Interesse für sie als Personen. (BASF Gemeinsam Zukunft gestalten)

Durch diese Aussage von BASF wird die „soziale Grammatik“ (Ebert 2001a, 18) in Bezug auf MITARBEITER aufrechtzuerhalten und das Konzept >Unternehmen bestehen aus Individuen/Menschen< mitaufgerufen, was die folgenden Belege verifizieren:<sup>265</sup>

Ein Unternehmen ist kein abstraktes Gebilde. Dahinter stehen immer Menschen – die Mitarbeiter. (BDF Nachhaltigkeitsbericht 2010)

Es sind immer die Menschen, die den Unterschied machen. Durch ihre Kreativität und ihr Wissen wird eine gute Idee erst zu einem großartigen Geschäftserfolg. Sie sind die Schnittstelle zu unseren Kunden, machen Innovationen möglich, entwickeln erfolgreiche Strategien und geben dem Unternehmen eine unverwechselbare Identität. (Henkel Vision und Werte)

*Mitarbeiter* wird somit bei HENKEL als Metonym für *Unternehmen* angesehen, die Letzterem eine *unverwechselbare Identität* geben, wobei durch das Verb *stehen für* eine explizit metonymische Beziehung konstruiert wird.<sup>266</sup>

Auf der Satzebene sind regelhafte Verbindungen mit Verben im Kotext von *Mitarbeiter\** eher selten auffindbar. Betrachtet man jedoch die Sprachhandlung der Sachverhaltsverknüpfung, fallen fünf zentrale thematische Bereiche auf, die mit MITARBEITER verknüpft und in den fol-

---

<sup>264</sup> Vgl. dazu auch Beispiele mit *Wert\** auf der Satzebene: „Unseren Mitarbeitern sowie ihren Interessenvertretern begegnen wir mit Respekt und Wertschätzung.“ (HeidelbergCement Corporate Mission).

<sup>265</sup> Vgl. dazu auch: „Ein professionelles und konzernweit hochwertiges Change-Management, das auch die Emotionalität und subjektive Betroffenheit [der Mitarbeiter, S.B.] einbezieht, unterstützt die Umsetzung von „One Company“.“ (Telekom GB 2010); „Langjährige verdiente Mitarbeiter können in schwierigen beruflichen oder privaten Situationen mit unserer Unterstützung rechnen.“ (HeidelbergCement Corporate Mission). Die DEUTSCHE POST wählt diesbezüglich als einziges Unternehmen die direkte Ansprache: „Step In – Induction: Wir heißen Sie willkommen bei Deutsche Post DHL. [...]Wir von Deutsche Post DHL sorgen dafür, dass Sie sich möglichst schnell bei uns zurechtfinden und unmittelbar Anschluss finden.“ (Deutsche Post Werte und Kultur).

<sup>266</sup> Vgl. dazu auch weitere metonymische Ersetzungen: „Die Menschen hinter Infineon. (Infineon Unser Infineon Team). Während bisher nur im Plural von *Mitarbeiter\** gesprochen wurde, wird die >Mitarbeiterindividualität< bei BMW betont: „Leistungsbereite und kompetente Mitarbeiter zeichnen die BMW Group aus. Dabei wird jeder Einzelne als Individuum respektiert.“ (BMW Verhaltenskodex).



genden Abschnitten behandelt werden: MITARBEITER + LEISTUNG (a), MITARBEITER + ENGAGEMENT (b), MITARBEITER + ERFOLG (c), MITARBEITER+ SICHERHEIT/GESUNDHEIT (d) sowie MITARBEITER + VERANTWORTUNG (e).

a) Wie bereits beim Konzept ›Mitarbeiterleistung‹ behandelt, wird eine von allen Unternehmen geteilte positive Korrelation zwischen MITARBEITER und LEISTUNG unterstellt (,Wille der Mitarbeiter zur Leistung und zum Erfolgsbeitrag‘). Während MERCK im folgenden Beleg eine inklusive Formulierung wählt (*wir alle*), differenziert LINDE zwischen *Mitarbeiter* und der *wir*-Gruppe und baut dadurch sprachlich Hierarchien auf:

Wir alle leisten durch unser Mitdenken, Mitgestalten und Mitverantworten einen persönlichen Beitrag zum unternehmerischen Erfolg. (Merck Leitbild)

Wir wollen, dass jeder Mitarbeiter erkennt, wie sich sein individueller Einsatz eingliedert ins Ganze, wie seine Leistung zum Unternehmenserfolg beiträgt. (Linde GB 2010)

Zudem wird in der Mehrzahl der Aussagen sichergestellt, dass es sich um eine ,hohe‘ LEISTUNG der MITARBEITER (*Höchstleistung, Spitzenleistung*) handelt:

Unser Ziel ist es, die Besten zu sein. Diesem Anspruch muss sich jeder stellen, und dieses bedeutet, dass jeder Mitarbeiter und jede Mitarbeiterin bereit ist, Höchstleistung zu bringen. (BMW GB 2010)<sup>267</sup>

Die starke Orientierung am Konzept ›Mitarbeiterleistung‹ zeigt sich auch durch die Emporhebung von *Leistung* zum Agens (in Verbindung mit der Paarformel *fordern und fördern*<sup>268</sup>):

Leistung fordert und fördert unsere Mitarbeiter. Leistung unterstützt die persönliche Entwicklung unserer Mitarbeiter. (Merck Merck Werte)

Die MITARBEITERLEISTUNG soll dabei in Intensität und Temporalität weiter erhalten werden, was sich auf der Satzebene durch die häufigen Verbindungen von *Mitarbeiter/Belegschaft* mit den Verben *stärken/erhalten* zeigt (,Mitarbeiterleistungsausdehnung‘):

Vor dem Hintergrund der demografischen Entwicklung haben wir diverse Initiativen gestartet, mit denen wir die Leistungsfähigkeit der Belegschaft erhalten und stärken sowie geeignete Nachwuchskräfte gewinnen wollen. (Daimler GB 2010)

Ebenso gehen Kookkurrenzen von *Mitarbeiter* und *Leistung\** mit *honorieren* und *anerkennen* (,Mitarbeiterleistungsanerkennung‘) einher:

An die Spitze! Leistung anerkennen – Chancen bieten. Wenn die Deutsche Telekom zum bestangesehenen Serviceunternehmen der Branche werden will, braucht sie motivierte und gute Mitarbeiter. Daher ist diese Leitlinie eine Verpflichtung für alle Führungskräfte, individuellen Einsatz und Erfolg anzuerkennen und ein positives Umfeld zu bieten mit Fortbildungsmöglichkeiten und Perspektiven. (Telekom Die Unternehmenswerte der Deutschen Telekom)

Zum Konzeptattribut ,Mitarbeiterleistungsanerkennung‘ zählen schließlich auch explizit performative Formen (*Dank*):

---

<sup>267</sup> Auffallend ist dabei jedoch auch, dass sich die *wir*-Gruppe – wie in diesem Beleg – indirekt in ›Leistungserwartung‹ und ›Leistungserbringer‹ aufspaltet (→ 8.5.1.4).

<sup>268</sup> Vgl. dazu auch: „Mit unserem Ideenmanagement/KVP (= Kontinuierliche Verbesserungsprozesse) optimieren wir die Qualität und Rentabilität von Prozessen und Produkten unter Beteiligung aller Mitarbeiter. Dabei fördern und fordern unsere Führungskräfte die Mitarbeiter sowohl individuell als auch in Teamarbeit.“ (K+S GB 2010).

Ein herzlicher Dank geht an unsere rund 470.000 Mitarbeiter, deren Leistung wir auch mit einer Sonderzahlung zum Jahresende honoriert haben. (Deutsche Post GB 2010)

Durch *Dank* wird die MITARBEITERLEISTUNG moralisch anerkannt und positiv bestätigt. Dies erfolgt neben der performativen Dankeshandlung auch durch den Verweis auf monetäre Anerkennung in Form von SONDERZAHLUNGEN (*Vergütungssystem*):

Um diese Unternehmenskultur zu entwickeln und zu stärken, fordern und fördern wir unsere Mitarbeiterinnen und Mitarbeiter. Durch ein entsprechendes Vergütungssystem setzen wir klare Anreize zu überdurchschnittlichen Leistungen. (Henkel GB 2010)

b) Um die Verknüpfung des Sachverhalts ENGAGEMENT mit MITARBEITER (>Mitarbeiterengagement<)<sup>269</sup> geht es in den nachfolgenden Ausführungen. Teilweise wird *Engagement* synonym zu *Leistung* genutzt, wobei Ersteres stärker das ‚positive Selbsteinbringen der Mitarbeiter‘ betont, d.h. dem Handeln der MITARBEITER weniger eine normativ-ökonomische als vielmehr eine stärker voluntativ-emotionale Komponente zufügt:

Diese drei Beispiele haben eines gemeinsam: Sie zeigen, wie unsere Mitarbeiter jeden Tag mit Engagement und Leidenschaft daran arbeiten, tragfähige Antworten auf die Herausforderungen unserer Zeit zu geben – ganz im Sinne des Pioniergeists, der bei uns seit 1847 Tradition hat und Siemens in eine erfolgreiche Zukunft führt. (Siemens Vision)

Die diskurstypische Attribuierung von ENGAGEMENT durch ‚groß‘<sup>270</sup> findet sich ebenfalls wie das Attribut ‚Mitarbeiterengagementanerkennung‘<sup>271</sup>. Mittels Metaphern wird des Weiteren die Bedeutsamkeit von >Mitarbeiterengagement< als Ausgangspunkt für WACHSTUM und ERFOLG betont (*auf Engagement beruhen*):

Tag für Tag erleben wir, dass das Unternehmenswachstum und unser Erfolg zu großen Teilen auf dem Engagement, dem unternehmerischen Gespür und dem bemerkenswerten Teamgeist unserer Mitarbeiter beruhen. (K+S GB 2010)

Daraus werden wiederum (implizit) deontische Aussagen zur ‚Mitarbeiterengagementaufrechterhaltung‘ abgeleitet:

E.ON steht für einen klaren und eindeutigen Anspruch: *cleaner & better energy*. Um diesem Anspruch gerecht zu werden, setzen wir auf das Engagement unserer Mitarbeiter [...]. (E.ON GB 2010)<sup>272</sup>

c) Eine weitere dominante Verknüpfung ist MITARBEITER + ERFOLG: Dass MITARBEITER und ERFOLG auch ursächlich in Verbindung stehen, wird immer wieder aufgegriffen (>Mitarbeiter sind Erfolgsbereiter<):

---

<sup>269</sup> Vgl. dazu auch die verbalen Formulierungsvarianten: „Für unsere Kunden setzen sich bei Infineon weltweit über 26.000 Mitarbeiter dafür ein, aus Ideen Zukunftslösungen zu entwickeln.“ (Infineon Wer wir sind).

<sup>270</sup> Vgl. dazu: „Im Geschäftsjahr 2010 haben wir zum ersten Mal eine weltweite Mitarbeiterbefragung zu Engagement und Compliance durchgeführt (Siemens Global Engagement and Compliance Survey 2010). Mehr als 275.000 Siemens-Mitarbeiter nahmen an dieser weltweit in mehr als 40 Sprachen durchgeführten Befragung teil. Die Ergebnisse waren sehr ermutigend und belegten das große Engagement unserer Mitarbeiter für Siemens und seine Werte.“ (Siemens GB 2010).

<sup>271</sup> Vgl. dazu: „Seinen wirtschaftlichen Erfolg und die führende Position im Dialysemarkt verdankt Fresenius Medical Care dem Engagement seiner Mitarbeiterinnen und Mitarbeiter.“ (FMC GB 2010).

<sup>272</sup> Vgl. dazu auch: „Media Markt lebt – wie alle Vertriebslinien der Metro Group – vom Engagement seiner Mitarbeiter. Sie geben das Beste für die Kunden.“ (Metro GB 2010).

Wesentlich für den Erfolg der BASF sind die Mitarbeiter. Auf sie kommt es an: auf ihr Können, ihre Ideen, ihre Erfahrung und ihr Engagement. (BASF Gemeinsam Zukunft gestalten)

›Mitarbeiter sind Erfolgsbereiter‹ wird daher auch mittels der *Grund\*/-Basis-/Fundament-Metapher* ausgedrückt:

Unsere weltweit rund 22.000 Mitarbeiter sind die Basis für unseren Unternehmenserfolg. (BDF Imagebroschüre)

Dagegen perspektiviert die metaphorische Aufbereitung durch *Schlüssel* die MITARBEITER als notwendige Bedingung für den ERFOLG, quasi als eine *conditio sine qua non* zum ERFOLG. Eine ähnliche Konzeptualisierung geschieht durch die Metapher *Erfolgsfaktor*:

Unsere Mitarbeiter sind der entscheidende Erfolgsfaktor im internationalen Wettbewerb. (Henkel GB 2010)

Gerade die Belege zur Metapher *Erfolgsfaktor* (*Mitarbeiter sind der [...] Erfolgsfaktor*) zeigen jedoch große Homogenität in der sprachlichen Realisierung, weshalb durch deren Nutzung keine sprachliche Alleinstellung möglich ist.

d) Die vierte signifikante Verknüpfung zeigt sich durch MITARBEITER + SICHERHEIT/GESUNDHEIT. SICHERHEIT und GESUNDHEIT werden meist gemeinsam behandelt (auch in organisationaler Verankerung als *Health & Safety*):

Wir verpflichten uns, für die Sicherheit und Gesundheit unserer Mitarbeiter, den Schutz unserer Umwelt und die Lebensqualität der Menschen in unserem Umfeld zu sorgen. (Henkel Vision und Werte)

Die untersuchten Unternehmen formulieren diese Verknüpfung vor allem im Hinblick auf das Konzept ›Gesundheits- und Sicherheitspflicht für Mitarbeiter‹:

Unsere Mitarbeiter vor arbeitsbedingten Gefahren zu schützen und ihre Gesundheit durch präventive Maßnahmen zu erhalten, hat oberste Priorität bei K+S. (K+S GB 2010)

E.ON gebraucht diesbezüglich das Wort *Fürsorgepflicht*:

Wir wollen uns dem Thema psychischer Erkrankungen nicht verschließen, denn unabhängig von der ökonomischen Tragweite solcher Erkrankungen haben wir für unsere Mitarbeiter auch eine klare Fürsorgepflicht, der wir gerecht werden müssen. (E.ON Cleaner and better energy)

Zugleich werden in den Belegen kompetitive ökonomische Konzepte integriert, etwa der Verweis auf AUSZEICHNUNGEN in Bezug auf ›Mitarbeitergesundheit‹:

Unser Gesundheitsmanagement wurde erneut ausgezeichnet: Die EU-Kommission und der BKK-Bundesverband haben uns den „Unternehmenspreis Gesundheit“ sowie den Sonderpreis „Psychische Gesundheit“ verliehen. (Deutsche Post GB 2010)<sup>273</sup>

*Gesundheitsmanagement* suggeriert zudem, dass sich die ‚körperliche‘ bzw. ‚geistige‘ ›Mitarbeitergesundheit‹ steuern und bearbeiten lässt (›Mitarbeitergesundheit zur Erhaltung der Leistungsfähigkeit‹). Diese Faktorisierung<sup>274</sup> fällt besonders durch die Kookkurrenz von *Gesundheitsmanagement*, *Leistungsfähigkeit* und *erhalten* auf:

---

<sup>273</sup> Vgl. dazu: „Für unsere Bemühungen um die psychische Gesundheit unserer Belegschaft sind wir im Berichtsjahr mit dem Corporate Health Award, [...] ausgezeichnet worden.“ (Telekom GB 2010).

<sup>274</sup> Vgl. dazu auch: „Wir sind überzeugt, dass die Gesundheit der Mitarbeiter ein wesentlicher Faktor für den wirtschaftlichen Erfolg eines Unternehmens ist. Wachsende Bedeutung kommt dabei der psychischen

Unser Betriebliches Gesundheitsmanagement (BGM) hat das Ziel, die Leistungsfähigkeit unserer Mitarbeiter zu erhalten. Angesichts einer sich abzeichnenden Verlängerung der Lebensarbeitszeit hat dieses Ziel eine neue Bedeutung gewonnen. (RWE Unsere Verantwortung 2010)

BEIERSDORF thematisiert im folgenden Beispiel explizit die ökonomischen Auswirkungen aus der Unternehmensperspektive durch die Dominantsetzung des Attributs ‚Mitarbeitergesundheit zur Erhaltung der Leistungsfähigkeit‘ (u.a. *Kosteneinsparungen*):

Die Sicherheit und Gesundheit unserer Mitarbeiter zu gewährleisten ist deshalb eine ganz entscheidende Aufgabe. [...] Die über die Jahre gleich bleibend hohe Anzahl von Vorschlägen zeigt, dass sich unsere Mitarbeiter konstruktiv für Verbesserungen einsetzen. Mit Vorteilen für beide Seiten: Als Unternehmen profitiert Beiersdorf von den Kosteneinsparungen, effizienteren Arbeitsabläufen sowie der Identifizierung weiterer Verbesserungspotenziale beim Arbeits- und Umweltschutz. Die Mitarbeiter wiederum steigern die Qualität ihres Arbeitsplatzes aus eigener Initiative. (BDF Nachhaltigkeitsbericht 2010)<sup>275</sup>

Unter Nutzung dieser Perspektivierung werden auf der Textebene diverse GESUNDHEITS-/PRÄVENTIONSPROGRAMME beworben (v.a. bei K+S, COMMERZBANK und BASF):

Suchtprävention. Der Anteil von Mitarbeitern mit Alkohol- und anderen Suchtmittelproblemen in Produktions- und Dienstleistungsbetrieben beträgt statistisch zwischen 5 und 10 %. An diesem Thema kommen auch wir bei K+S nicht vorbei. [...] Der Präventionsgedanke steht bei uns im Vordergrund: Wir setzen auf Aufklärung, verantwortliches Handeln, auf Unterstützung und Hilfeleistung. Mit frühzeitiger Bereitschaft zur Intervention und durch verantwortliches Handeln unserer Führungskräfte wollen wir suchtbefragten Problemen konsequent entgegensteuern. (K+S GB 2010)<sup>276</sup>

e) Als letzte auffallende Verknüpfung gilt MITARBEITER + VERANTWORTUNG. Diese wird insbesondere durch das Syntagma *Verantwortung für/gegenüber x Mitarbeiter* ausgedrückt, wodurch sich ein ›Verantwortungsträger‹ (‚Unternehmen‘, das meist durch die *wir*-Gruppe realisiert wird) gegenüber ›Verantwortungsadressaten‹ (‚Mitarbeiter‘) bekennt:

Soziale Verantwortung für unsere Mitarbeiter. Unsere weltweit über 250.000 Mitarbeiterinnen und Mitarbeiter gestalten den nachhaltigen Erfolg von Daimler. Bei ihnen beginnt unsere soziale Verantwortung. (Daimler Unternehmensinformationen 2010)

Bei MAN wird ‚Mitarbeiter‘ explizit durch *einzelne Mitarbeiter* fokussiert:

Gegenüber den Mitarbeitern setzt MAN auf eine verantwortungsvolle Personalpolitik. Hier steht der einzelne Mitarbeiter im Vordergrund – MAN legt besonderen Wert auf eine individuelle Förderung und kontinuierliche Weiterentwicklung. Das Unternehmen unterstützt dabei insbesondere Mitarbeiter, die Initiative zeigen und bereit sind, Verantwortung zu übernehmen. (MAN GB 2010)<sup>277</sup>

Wie der Beleg von MAN zeigt, wird der ‚Mitarbeiter‘ darin selbst zum ›Verantwortungsträger‹, was jedoch nur wenige andere Belege bestätigen:

Jeder Mitarbeiter und jede Mitarbeiterin in der BMW Group trägt persönliche Verantwortung für den Erfolg des Unternehmens. (BMW GB 2010)

---

Gesundheit zu, da solche Erkrankungen fast immer Langfristerkrankungen und statistisch für fast zehn Prozent der Ausfallzeiten verantwortlich sind.“ (E.ON Cleaner and better energy).

<sup>275</sup> Diese Perspektivierung aus Unternehmenssicht mit Fokussierung des ökonomischen Aspekts wird verstärkt durch die Formulierung *investieren in die Gesundheit*: „Neben der Aus- und Weiterbildung investieren wir in die Gesundheit unserer Mitarbeiter.“ (Lufthansa GB 2010).

<sup>276</sup> Vgl. dazu auch: „An unseren Standorten im In- und Ausland sind Maßnahmen zur Gesundheitsförderung, Gesundheitstage sowie themenbezogene Informationsveranstaltungen fest verankert. Die Angebote reichen von Darmkrebsvorsorge über Ernährungsberatung, Nichtraucherprogramme, Entspannungs- und Stressbewältigungstechniken bis hin zu Kursen zur Rückengesundheit und diversen Sportarten.“ (K+S GB 2010).

<sup>277</sup> Vgl. dazu auch: „Verantwortung gegenüber dem Mitarbeiter.“ (MAN Unternehmensleitbild).

Der Ausdruck *Eigenverantwortung* unterstreicht diese Perspektivierung ebenso:

Wir motivieren unsere Mitarbeiter durch herausfordernde Aufgaben und viel Eigenverantwortung. (BDF Imagebroschüre)<sup>278</sup>

Insgesamt dominieren jedoch die Belege zum nicht-personalen ›Verantwortungsträger‹ ‚Unternehmen‘. Auf der Textebene finden sich schließlich, neben den Kapiteln zu MITARBEITERN im *Geschäftsbericht*, Bezugnahmen auf MITARBEITER durch eigene Teiltexzte. INFINEON präsentiert diesbezüglich den Text *Unsere Mitarbeiter-Philosophie*:

- **Infineon bietet** ein innovatives Arbeitsumfeld und motiviert seine Mitarbeitern, sich aktiv in ihrem Job einzubringen.
- **Infineon unterstützt** seine Mitarbeiter bei der Entfaltung ihres persönlichen Potenzials mit einem breiten Angebot an Schulungen, Entwicklungsmöglichkeiten und Karrierechancen.
- **Infineon fördert** eine von Vielfalt, Offenheit und Verständigung geprägte Kultur innerhalb eines global agierenden Unternehmens.
- **Infineon-Mitarbeiter** und Führungskräfte fühlen sich den gleichen Werten und Prinzipien verpflichtet. Ehrlichkeit, Offenheit und Verlässlichkeit im Umgang miteinander stehen dabei an oberster Stelle. (Infineon Unser Infineon Team)

MITARBEITER werden durch diesen Text (sowie das Kompositum *Infineon-Mitarbeiter*) direkt an INFINEON geknüpft. Sie sind somit in der TEIL-GANZES-Relation zum UNTERNEHMEN ausschlaggebend, d.h. was von ihnen als Teilen ausgesagt wird, „wird auch vom Ganzen ausgesagt“ (Frauenholz 2009, 123).<sup>279</sup> Das letzte Konzept, das in diesem Kapitel aufgenommen wird, materialisiert sich ebenfalls sprachlich vor allem über die Textebene. ›Mitarbeitervielfalt‹ wird durch Überschriften und textuelle Wiederaufnahmen von *\*vielfalt, Diversity oder vielfältig\** aufgerufen. Die DEUTSCHE POST reflektiert das Konzept am ausführlichsten:

Diversity: Die Vielfalt unserer Mitarbeiter ist unsere Stärke. Bei Deutsche Post DHL arbeiten Frauen und Männer mit den unterschiedlichsten nationalen, ethnischen religiösen und persönlichen Hintergründen, Menschen mit Behinderung und unterschiedlicher sexueller Orientierung. Diese Vielfalt ist es, die unseren Konzern einzigartig und erfolgreich macht. (Deutsche Post Werte und Kultur)

Verschiedene KULTUREN (bzw. soziale Hintergründe) der MITARBEITER werden demnach individuell akzeptiert und als positiv (*einzigartig, erfolgreich*) für DEUTSCHE POST beschrieben. Bei DAIMLER sowie HEIDELBERGCEMENT wird die ökonomische Relevanz von ›Mitarbeitervielfalt‹ noch stärker deutlich:

Diversity verstehen wir als ein Managementkonzept, das durch Teamwork und Einbringung verschiedener Kulturen, Talente und Erfahrungshorizonte auf eine Zusammensetzung der Belegschaft abzielt, die unsere Präsenz auf den internationalen Märkten, unsere Kundenstruktur und unser Geschäftsumfeld widerspiegelt. (HeidelbergCement GB 2010)

So wird *Diversity* als *Managementkonzept* bezeichnet; der Ausdruck *Maßnahmen* steht dabei

---

<sup>278</sup> *\*Verantwort\* Handeln* in Kookkurrenz mit *Mitarbeiter* findet sich häufig, wobei auch textuelle Fixierungen stattfinden (→ dieser Anhang, 1.5.4).

<sup>279</sup> Dies gilt besonders für Dienstleistungsunternehmen, denn im Gegensatz zu Produktunternehmen sind diese durch ihren immateriellen Status nicht direkt materiell fassbar (vgl. Kastens 2008, 250). Der MITARBEITER „branded“ die zu verkaufende Leistung (vgl. Kastens 2008, 256), etwa durch Ehrlichkeit oder Kompetenz in einer kommunikativen Interaktion (Beratung etc.).



häufig in Konkurrenz zu *vielfalt\** oder *Diversity*, sodass ›Mitarbeitervielfalt‹ funktionalisiert wird.<sup>280</sup>

Mit verschiedenen Richtlinien und Maßnahmen versucht die SAP, auf die vielfältige Zusammensetzung ihrer Belegschaft einzugehen. Hierzu gehören Programme für ein ausgewogenes Verhältnis von Arbeit und Privatleben wie flexible Arbeitszeiten und verschiedene Teilzeitmodelle, Arbeitszeitmodelle wie Auszeiten (Sabbaticals) und Vorruhestand, Heimarbeitsplätze, Angebote zur Vereinbarkeit von Familie und Beruf (zum Beispiel durch Eltern-Kind-Büros) [...]. (SAP GB 2010)

Diese MASSNAHMEN werden sprachlich auch unter *Diversity Management*<sup>281</sup> geführt. Ebenso Ausdrücke wie *Maßnahmen zu Personal-Recruiting, Personalbindung und -entwicklung* wirken aufgrund der fachsprachlichen Metaphern und der Kollektivierung (*Personal\**) wenig individualisierend in Bezug auf MITARBEITER, was im Kapitel Metaphern (→ 8.4.3.5) bereits diskutiert wurde:

Mit gezielten Maßnahmen zu Personal-Recruiting, Personalbindung und -entwicklung will Deutsche Post DHL dazu beitragen, das Potenzial der Beschäftigten vor dem Hintergrund sinkender Bevölkerungszahlen und steigendem Altersdurchschnitt zu nutzen. (Deutsche Post Werte und Kultur)

Durch Formulierungen dieser Art wird wiederum stark aus der Rolle ‚Arbeitgeber‘ des Unternehmens heraus gesprochen.<sup>282</sup> Um auch in dieser Rolle die Perspektive der MITARBEITER zu integrieren, verweisen Unternehmen abschwächend auf MITARBEITERBEFRAGUNGEN (›Mitarbeiterbefragung‹<sup>283</sup>), denn ihr Kernanliegen bleibt die Identifikation der MITARBEITER mit dem UNTERNEHMEN (→ 9.1.3).

Dieses Kapitel fasste zusammen, wie MITARBEITER vor allem im Hinblick auf ›Mitarbeiterleistung‹ und ›Mitarbeiterwissen‹ für Unternehmen bedeutsam sind und seriell in Verbindung mit den Sachverhalten LEISTUNG, ENGAGEMENT, ERFOLG, VERANTWORTUNG sowie SICHERHEIT/GESUNDHEIT gebracht werden. Gleichzeitig nehmen die Unternehmen eine Doppelperspektive ein, da sie einerseits eine ›Fürsorgepflicht‹ gegenüber den MITARBEITERN haben (›Unternehmen bestehen aus Individuen/Menschen‹, ›Mitarbeitervielfalt‹), gleichzeitig aber – aus

---

<sup>280</sup> Vgl. dazu auch die organischen Metaphern: „Vielfalt ist immer der Monokultur voraus. Sie ist befruchtender und am Ende erfolgreicher.“ (Daimler Das Unternehmen 2011); „Für uns bedeutet Diversity produktive Vielfalt. Diversity ist ein maßgeblicher Treiber des Wandels unserer Unternehmenskultur – von der Monokultur zum offenen Arbeitgeber.“ (Telekom GB 2010).

<sup>281</sup> Vgl. dazu: „Diversity Management ist als Bestandteil der Beschäftigungspolitik im Verhaltenskodex unseres Konzerns verankert. Wir beteiligen uns an dem Pilotprojekt „Anonymisiertes Bewerbungsverfahren“ der Antidiskriminierungsstelle des Bundes, um zu prüfen, ob wir auf diesem Wege neue Bewerbergruppen gewinnen können.“ (Deutsche Post GB 2010).

<sup>282</sup> Vgl. dazu auch die Bezugnahme auf AUSZEICHNUNGEN: „Im Jahr 2010 konnten wir uns erneut in Arbeitgeberrankings vieler Länder als attraktives Unternehmen sowohl für Hochschulabgänger als auch für Interessenten mit Berufserfahrung erfolgreich positionieren.“ (Henkel GB 2010).

<sup>283</sup> Vgl. dazu: „Unsere jährliche Mitarbeiterbefragung zeigt uns, welche Fortschritte wir auf dem Weg zum bevorzugten Arbeitgeber machen.“ (Deutsche Post GB 2010); „Das Stimmungsbarometer wurde im Jahr 2010 zum dritten Mal durchgeführt. 285.000 Mitarbeiter wurden weltweit befragt. Die Teilnahmequote betrug 87 % aller Mitarbeiter an den in die Befragung einbezogenen Standorten und Gesellschaften. Vor allem in den Bereichen Kommunikation, Zusammenarbeit und Arbeitszufriedenheit zeigte sich im Vergleich zum Vorjahr eine positive Entwicklung.“ (VW GB 2010).



der Rolle ‚Arbeitgeber‘ heraus – attraktiv für MITARBEITER bleiben und diese binden möchten (‚Mitarbeitergesundheit zur Erhaltung der Leistungsfähigkeit‘, ›Mitarbeiterbefragung‹). Gelingt dieses, tragen MITARBEITER durch die eigene Identifikation zur IDENTITÄT des UNTERNEHMENS bei (vgl. Kläßen 1999, 67).

### 1.2.8.3 GESELLSCHAFT

Die IDENTITÄT des UNTERNEHMENS bildet sich schließlich erst im kommunikativen Austausch mit anderen Systemen der Umgebung sowie im Gesamtsystem GESELLSCHAFT heraus. Dass der Sachverhalt GESELLSCHAFT für Unternehmen (gegenwärtig) eine immense Rolle in der Thematisierung spielt, bestätigt nicht nur diese Analyse (→ 6.2). Die Häufung der Ausdrücke *Gesellschaft\** und *gesellschaftlich\** im Korpus legt diese These nahe, wobei seltener Komposita mit *\*gesellschaft\**, außer bei TELEKOM (*Gigabit-Gesellschaft*<sup>284</sup>), auftreten. Auf der Syntagmenebene werden adjektivische Attributionen von *Gesellschaft\** ebenso nur in relativ geringer Anzahl vorgenommen. Es findet sich die possessivische Konstruktion *unsere\* Gesellschaft*, mit der Unternehmen das Attribut ‚besitzanzeigend‘ dominant setzen, sich aber damit auch als ›Teil der Gesellschaft‹ konzeptualisieren. Ein weiteres Syntagma, das regelhaft realisiert wird – besonders am Satzende in fokussierter Stellung – ist *für die Gesellschaft*:

Seit Jahren engagieren wir uns als verantwortungsbewusster „Corporate Citizen“ für die Gesellschaft. (Deutsche Börse Standpunkte)

Durch die Präposition *für* wird die ‚Gesellschaft‘ als ›Unternehmensadressat‹ bzw. ›Gesellschaft als Nutznießer‹ gekennzeichnet. Teilweise zeigte sich diese Konzeptualisierung auch in Zusammenhang mit anderen Anspruchsgruppen, was bereits in Kapitel → 8.5.2 aufgeführt wurde:

Wir übernehmen unternehmerische Verantwortung für Umwelt, Mitarbeiter und Gesellschaft. (MAN Unternehmensleitbild)

In diesen Belegen geht es meistens um die ›Gesellschaftshandlung‹ ‚Gesellschaftsverantwortungsübernahme‘ oder ‚Gesellschaftswertschaffung‘:

Unser Leitbild: Wir wollen der weltweit führende Anbieter von Finanzlösungen sein und nachhaltig Wert schaffen – für unsere Kunden, unsere Aktionäre, unsere Mitarbeiter und für die Gesellschaft als Ganzes. (Deutsche Bank Leitbild und Marke)

Täglich entscheiden sich weltweit Millionen Kunden und Verbraucher für unsere Marken und Technologien. Diese sind unser zentraler Wertbeitrag für die Gesellschaft. (Henkel GB 2010)

Im Sinne der ökonomischen Logik wird durch *Nutzen* auch der ‚Gesellschaftsnutzen‘ angeführt:

In den letzten zwei Jahren hat kein Investment in der Region mehr Arbeitsplätze und mehr Nutzen für die Gesellschaft geschaffen. (ThyssenKrupp GB 2010)

---

<sup>284</sup> Vgl. dazu: „Wir sind auf dem Weg in die Gigabit-Gesellschaft – und die Deutsche Telekom gestaltet sie aktiv mit.“ (Telekom GB 2010). TELEKOM verknüpft durch *Gigabit-Gesellschaft* GESELLSCHAFT und PRODUKT.

Siemens Corporate Citizenship legt den Schwerpunkt auf Aktivitäten, die über unsere eigentliche Geschäftstätigkeit hinausgehen und langfristigen gesellschaftlichen Nutzen stiften. (Siemens GB 2010)

Wie der letzte Beleg zeigt, wird der Bezug auf die GESELLSCHAFT auch adjektivisch mittels *gesellschaftlich\** realisiert (s.u.). Ein weiteres musterhaftes substantivisches Syntagma stellt *in der Gesellschaft* dar:

Wir streben nach Anerkennung unseres Unternehmens in der Gesellschaft. (Merck Leitbild)

Dieses Syntagma dient durch die lokale Präposition *in* (Lokativ) wiederum dazu, das ‚Unternehmen‘ als ›Teil der Gesellschaft‹ zu präsentieren:

Wir wollen Werte für alle Stakeholder schaffen. Darum engagieren wir uns in der Gesellschaft und an unseren Standorten und leisten Beiträge zur Entwicklung des gesellschaftlichen Ordnungsrahmens. (Daimler GB 2010)

DAIMLER offenbart in diesem Beleg, dass das Unternehmen sich einerseits ‚nahe an der umgebenden Gesellschaft‘ (*an unseren Standorten*, d.h. als NACHBAR, s.u.) sowie auch ‚innerhalb der Gesellschaft‘ (*des gesellschaftlichen Ordnungsrahmens*) positionieren will. Auf der Metaebene wird diese zweifache Verortung nochmals aufgegriffen (*verstehen*):

Wir verstehen uns als »mitgestaltender Akteur in der Gesellschaft«. Deswegen setzen wir uns für unsere Mitarbeiter, unsere Kunden und für die Menschen im Umfeld unserer Standorte ein. (Daimler GB 2010)

Auch FRESenius MEDICAL CARE greift die duale lokale Verortung (‚nahe an der umgebenden Gesellschaft‘ sowie ‚innerhalb der Gesellschaft‘) auf:

Darüber hinaus engagieren wir uns als Dienstleister in unseren Kliniken, als Partner in und gemeinsam mit Verbänden, als Nachbar in unserem Umfeld und als Unternehmen in der Gesellschaft für eine bessere Lebensqualität von Nierenpatienten. (FMC GB 2010)

Dass sich Unternehmen als Akteure ‚innerhalb der Gesellschaft‘ als ›Teil der Gesellschaft‹ begreifen, legen auch die genitivischen Syntagmen *X der Gesellschaft* in Kombination mit *verstehen* nahe:

Wir verstehen uns als Teil der Gesellschaft, in der wir unternehmerisch aktiv sind. Wir fördern – im Rahmen unserer Möglichkeiten – deren Entwicklung lokal und regional. (MAN Unternehmensleitbild)

Wie der Beleg zeigt, wird ›Teil der Gesellschaft‹ hierbei lexikalisch durch *Teil* oder *Mitglied* ausgedrückt:

Die Konzernunternehmen verstehen sich überall dort, wo wir Standorte haben, als ein aktives Mitglied der Gesellschaft und unterstützen eine Vielzahl von gemeinnützigen Projekten, Organisationen und Initiativen. (ThyssenKrupp GB 2010)

Während *aktives Mitglied* bei THYSENKRUPP klar das Attribut ‚innerhalb der Gesellschaft‘ dominant setzt, schließen sich manche Unternehmen durch das Syntagma *Partner der/für X* dennoch aus der *Ingroup* der GESELLSCHAFT aus und sind daher zwar ›Teil der Gesellschaft‹, aber im engeren Sinne nur ‚Partner der Gesellschaft‘:

Wir bleiben ein verlässlicher Partner für Kunden, Aktionäre und die Gesellschaft. (BASF Gemeinsam Zukunft gestalten).

Des Weiteren finden sich beim Syntagma *X der/von Gesellschaft* wiederum Fügungen, wel-

che das Konzept ›Gesellschaft als Nutznießer‹ evozieren, was bereits im Kapitel KUNDEN (→ 9.2.8.1) diskutiert wurde:

Nachhaltige Entwicklung: [...] ist nur ein Beispiel dafür, wie die Allianz das soziale Engagement unserer Mitarbeiter unterstützt und fördert, ebenso wie die Nutzung der Expertise und der Kompetenzen des Unternehmens zum Vorteil der Gesellschaft. (Allianz GB 2010)

Die Strategie ist auf geschäftlichen Erfolg ausgerichtet, achtet aber genauso die Interessen von Mitarbeitern und Kunden, von Kapitalgebern und Gesellschaft. (Merck Stabile Einheit: Leitbild, Werte, Strategie)

Durch die Syntagmen *Vorteile der/Interessen der/von Gesellschaft* wird gleichzeitig auf die oft gegensätzlichen Ansprüche der Systeme UNTERNEHMEN und GESELLSCHAFT angespielt, was E.ON explizit thematisiert:

Die CR-Organisation verfolgt das Ziel, auf die unterschiedlichen Interessen der Gesellschaft einzugehen und im Dialog mit unseren Stakeholdern zu stehen. (E.ON GB 2010)

Diese Wechselbeziehungen zwischen UNTERNEHMEN und GESELLSCHAFT wird auch durch das Syntagma *Einfluss auf die Gesellschaft* verdeutlicht, was jedoch impliziert, dass die GESELLSCHAFT vom UNTERNEHMEN beeinflusst wird (›Unternehmen beeinflusst Gesellschaft‹):

Wir wissen: Unsere unternehmerischen Aktivitäten haben einen Einfluss auf die Gesellschaft. Darum zeigen wir unseren Respekt auch gegenüber den Menschen, mit denen wir umgehen, und der Umwelt, in der wir leben. (Deutsche Post GB 2010)

LINDE verwendet diesbezüglich – unter Verwendung der *Raum*-Metapher – eine Formulierungsvariante:

Als Unternehmen handeln wir nicht in einem gesellschaftsfreien Raum, sondern in einem sozialen Umfeld, das wir durch unsere Tätigkeit beeinflussen. (Linde GB 2010)

LINDE erkennt durch solche Formulierungen an, dass das Unternehmen nicht in einem *gesellschaftsfreien Raum* wirtschaftet, sondern sich in einem komplexen System von AKTEUREN befindet, die sich reziprok beeinflussen, was letztlich auf ihre IDENTITÄT einwirkt.

Der Sachverhalt GESELLSCHAFT wird ebenfalls adjektivisch realisiert (*gesellschaftlich*\* + X) und an andere Sachverhalte (versprachlicht durch Substantiv X) gebunden:

Gesellschaftliche Leistung: Wert für die Gesellschaft. (BASF GB 2010)

Wir stärken unsere Märkte und profitieren über die direkten Erträge unserer Geschäftstätigkeit hinaus vom gesellschaftlichen Mehrwert, den wir als Unternehmen schaffen. (Siemens GB 2010)

In solchen Fügungen wird vor allem die ›Gesellschaftsleistung‹ der Unternehmen in den Vordergrund gerückt. Der Fokus liegt demzufolge nicht mehr auf der GESELLSCHAFT (›Gesellschaft als Nutznießer‹), sondern auf dem UNTERNEHMEN, das eine ›Gesellschaftsleistung‹ erbringt. Dieses Konzept wird in seiner normativen Aussagekraft durch das Syntagma *gesellschaftliche\* Pflichten* oder *Anforderungen* verstärkt. Die ›Gesellschaftsleistung‹ des Unternehmens bezieht sich meist auf ‚zukünftige Tendenzen‘:

Wir orientieren uns an den wesentlichen technischen und gesellschaftlichen Trends und prägen diese entscheidend mit. (Telekom GB 2010)

Speziell das Syntagma *gesellschaftliche\* Entwicklung\** taucht diesbezüglich regelhaft auf:

Als guter Unternehmensbürger und global agierendes Unternehmen blickt Daimler über die Konzerngrenzen hinaus und kümmert sich um positive und nachhaltige gesellschaftliche Entwicklungen. (Daimler Das Unternehmen 2011)

Ein weiteres Substantiv, das *gesellschaftlich\** attribuiert, ist *Umfeld*, womit wiederum die bereits angesprochene räumliche Lokalisierung durch ‚nahe an der umgebenden Gesellschaft‘ sowie ‚innerhalb der Gesellschaft‘ konzeptuell aufgenommen wird:

Unsere Präsenz in vielen Ländern dieser Welt bietet uns die Chance, das gesellschaftliche Umfeld aktiv mitzugestalten und den Dialog zwischen den Kulturen zu fördern. (Daimler Das Unternehmen 2011)

DAIMLER positioniert sich demnach gewissermaßen auch als Ordnungsinstanz dieses Feldes (*gesellschaftliche Umfeld aktiv mitzugestalten*). Auf diesen Aspekt weisen Schmid/Lyczek (2008, 40) hin, da Unternehmen nicht nur sich selbst in einem sinngebenden Prozess entwerfen, sondern im Sinne einer „Ko-Evolution“ (Schmid/Lyczek 2008, 40) auch die umgebende Gesellschaft mitgestalten und -entwickeln. Die beschriebene ›Gesellschaftsleistung‹ fällt häufig auch unter den abstrakten Sammelbegriff *gesellschaftliches Engagement* (*Engagement* ist *Keyword* und Hochfrequenzwort), welchen alle Unternehmen im Korpus anführen:

Gesellschaftliches Engagement ist als wichtiger Teil unserer Unternehmenskultur in unserem Verhaltenskodex verankert und spiegelt sich in unserem täglichen Handeln wider. (K+S GB 2010)

Auf der Textebene wird *gesellschaftliches Engagement* weiter vertieft:

Unser gesellschaftliches Engagement konzentriert sich auf die Bereiche Bildung, Familie und Kultur. So unterstützen wir mit NIVEA unter anderem Plan International mit dem Ziel, die Chancengleichheit junger Menschen durch gezielte Bildungsmaßnahmen weltweit zu verbessern. Unser wirtschaftlicher Erfolg bildet dabei die Grundlage unseres gesellschaftlichen Engagements. (BDF Imagebroschüre)

Gesellschaftliches Engagement hat für Linde viele Facetten – und viele Gesichter. Das Unternehmen unterstützt Partner mit langjähriger Erfahrung, etwa NGOs, bei deren Projekten und initiiert auch eigene soziale Programme. Linde unterstützt den freiwilligen Einsatz seiner Mitarbeiter in den jeweiligen Kommunen, etwa bei Hilfsprojekten für Kinder und Jugendliche oder Einsätzen nach Naturkatastrophen. (Linde GB 2010)<sup>285</sup>

Ebenfalls zahlreich wird sich durch *gesellschaftliche Verantwortung*, was bereits im Kapitel VERANTWORTUNG (→ dieser Anhang, 1.5.4) aufgegriffen wurde, auf eine ›Fürsorge-Verantwortung‹ bezogen, die gegenüber der GESELLSCHAFT eingenommen wird:

Gesellschaftliche Verantwortung: Wir fokussieren dabei auf Themen, die von globaler oder besonderer gesellschaftlicher Relevanz in den Ländern sind, in denen Bayer vertreten ist. (Bayer Namen.Zahlen.Fakten 2011/2012)

Diese Aussagen (*gesellschaftliches Engagement, gesellschaftliche Verantwortung*) nehmen

---

<sup>285</sup> Vgl. dazu die Bezugnahme auf eigene STIFTUNGEN für *gesellschaftliches Engagement*: „Die Siemens Stiftung – Die gemeinnützige Siemens Stiftung wurde im Herbst 2008 mit einem Startkapital von 390 Mio. EUR gegründet. Sie verstärkt nachhaltig die mehr als 160-jährige Tradition des gesellschaftlichen Engagements der Siemens AG. Am 1. Januar 2009 nahm die Stiftung ihre Arbeit auf. Sie ist mit Projekten zur Stärkung der Zivilgesellschaft insbesondere in Afrika, Lateinamerika und Europa tätig. Ziel ist es, einen langfristigen Beitrag zur Minderung von Armut und zu höherer Chancengleichheit zu leisten. Die Stiftung arbeitet auf drei Gebieten: Sie unterstützt den Ausbau der Grundversorgung sowie die Verbesserung von Sozialstrukturen, initiiert Bildungsprojekte und trägt zur Weiterentwicklung kultureller Identität bei.“ (Siemens GB 2010).

dadurch auch das *Corporate-Citizen-Konzept*<sup>286</sup> auf, das UNTERNEHMEN im fairen systemischen Austausch mit der es umgebenden GESELLSCHAFT ansieht (→ dieser Anhang, 1.13.6):

Auf sozialer Ebene fördern wir die Entwicklung unserer Mitarbeiter und streben danach, in allen Gesellschaften, in denen wir tätig sind, als gesellschaftlich engagiertes Unternehmen (*Corporate Citizen*) wahrgenommen zu werden. (Siemens GB 2010)

Die Metaphern *Good Corporate Citizen/gute\* (Unternehmens-)Bürger*<sup>287</sup> sowie *guter Nachbar* bzw. *gute Nachbarschaft* bewerten die ›Gesellschaftsleistung‹ des Unternehmens zudem:

Das Unternehmen versteht sich als Teil der Gesellschaft und fühlt sich verpflichtet, verantwortungsbewusst als „Good Corporate Citizen“ zu handeln. (Bayer Namen.Zahlen.Fakten 2010/2011)<sup>288</sup>

*Guter Nachbar* bzw. *gute Nachbarschaft* rufen zusätzlich das Konzept ›räumliche Lokalisierung‹ unter Dominantsetzung von ‚nahe an der umgebenden Gesellschaft‘ auf (→ dieser Anhang, 1.13.6):

„Kann ein globales Unternehmen ein guter Nachbar sein?“ Wer international tätig ist, muss seine gesellschaftliche Verantwortung über Ländergrenzen hinweg wahrnehmen. (Linde GB 2010)

RWE ist in den Regionen, in denen der Konzern tätig ist, stark verwurzelt – hier leben unsere Mitarbeiter und Kunden. Gute Nachbarschaft und der direkte Austausch mit unseren Stakeholdern vor Ort sind uns wichtig. Durch unser gesellschaftliches Engagement wollen wir einen Beitrag zu guter Nachbarschaft und damit auch zur Akzeptanz unseres Unternehmens leisten. (RWE Unsere Verantwortung 2010)

RWE koppelt *gesellschaftliches Engagement* und *gute[r] Nachbarschaft* im letzten Satz an den Akzeptanzbegriff, was offenbart, dass die kommunikative Auseinandersetzung bzw. Steuerung der Gesellschaft für Unternehmen enorm wichtig im Sinne von Interessendurchsetzung ist (Klaßen 1999, 72), gerade in umstrittenen Branchen wie der Energieindustrie. Es reicht demnach nicht, wenn das Unternehmen in sich als Sozialsystem funktioniert und sich als solches ‚innerhalb der Gesellschaft‘ positioniert, sondern muss von dieser Gesellschaft auch in seinem Handeln akzeptiert werden. Das Syntagma *gesellschaftliche Akzeptanz* taucht daher auch bei anderen Unternehmen auf:

Eine wichtige Voraussetzung für den Betrieb unserer Standorte ist die gesellschaftliche Akzeptanz unseres Handelns. (K+S GB 2010)

---

<sup>286</sup> Vgl. dazu auch die vier klassischen CSR-Sektionen *Environment, Community, Culture* und *Sports*: „Fluthilfe in Thailand: Mitarbeiter der Linde Tochtergesellschaft TIG verteilen gespendete Lebensmittel und Trinkwasser.“ (Linde GB 2010); „Bayer bekräftigt daher sein traditionell großes Engagement für die Berufsausbildung junger Menschen; 156 davon erhielten in dem Bayer-Starthilfe-Programm die Chance, schulische Defizite auszugleichen und einen Einstieg ins Berufsleben zu finden.“ (Bayer Namen.Zahlen.Fakten 2010/2011); „Die Philharmonie Merck ist Teil unseres kulturellen Engagements.“ (Merck GB 2010); „Mit dem Programm „GoTeach“ setzen wir uns für bessere Bildung und gerechte Bildungschancen ein.“ (Deutsche Post GB 2010). Solche Textpassagen weisen eine Reihe musterhafter Ausdrücke auf: *Initiative, Projekt, Engagement, Beitrag (leisten), Pflicht, Verpflichtung, Verantwortung, helfen, unterstützen, einsetzen, fördern, freiwillig\** sowie diverse Eigennamen (z.B. *Bayer-Starthilfe-Programm, GoTeach*).

<sup>287</sup> Vgl. dazu auch: „Wir unterstützen Bildungs- und Wohltätigkeitsinitiativen im Umfeld unserer Aktivitäten und wirken als gute Bürger am politischen, kulturellen und sozialen Geschehen auf lokaler und regionaler Ebene mit.“ (HeidelbergCement Corporate Mission).

<sup>288</sup> Vgl. dazu auch: „Für Volkswagen als „good corporate citizen“ ist das gesellschaftliche Engagement seit jeher Teil des unternehmerischen Handelns. An unseren weltweiten Standorten unterstützen wir soziale Entwicklung, Kultur und Bildung.“ (VW GB 2010).

Der Beleg von K+S lässt anklingen, dass GESELLSCHAFTLICHE AKZEPTANZ dem STANDORT-BETRIEB dienlich ist, also vorrangig vor dem Hintergrund gewinnbringender Faktoren, etwa der Schaffung eines positiven sozioökonomischen Umfeldes zur Absicherung getätigter und zukünftiger Investitionen am Standort (vgl. Kläßen 1999, 41), geschieht.<sup>289</sup> Auch weitere Belege zeigen solche direkten kausalen Verknüpfungen, wobei THYSSENKRUPP im folgenden Beleg die Verknüpfung GESELLSCHAFTSLEISTUNG → ERFOLG durch das Kausaladverb *daher* nochmals unterstützt:

Gesellschaftliches Engagement. Der nachhaltige Erfolg von ThyssenKrupp wird beeinflusst von einer intakten und zukunftsfähigen Gesellschaft – sowohl unmittelbar an unseren Standorten als auch auf nationaler und internationaler Ebene. Daher engagiert sich ThyssenKrupp bei einer Vielzahl von Projekten und Initiativen, um Zukunftsperspektiven zu verbessern und Hilfebedürftige zu unterstützen. (ThyssenKrupp GB 2010)<sup>290</sup>

Dieses Kapitel veranschaulichte somit, dass Unternehmen, besonders durch die Bezugnahme auf das Konzept ›Gesellschaftsleistung‹, (ausgleichende) soziale Arbeit sprachlich zu betreiben suchen, um ihr unternehmerisches Handeln in der Gesellschaft zu legitimieren. Die GESELLSCHAFT wird als TEIL eines Systems konstruiert, mit dem sich ein UNTERNEHMEN (notwendigerweise) austauscht, da Letzteres als ›Teil der Gesellschaft‹ auftritt und von der GESELLSCHAFT (an) erkannt werden muss, um ebenfalls als TEIL zu fungieren.<sup>291</sup> Da alle ANSPRUCHSGRUPPEN/SOZIALE OBJEKTE (KUNDEN, MITARBEITER, GESELLSCHAFT), die Unternehmen zur Identitätskonstruktion benötigen, in den letzten Kapiteln behandelt wurden, kann nun ein Blick auf die von ihnen konstruierten ZIELE/ERFÜLLUNGSZUSTÄNDE geworfen werden.

## 1.2.9 ZIELE/ERFÜLLUNGSZUSTÄNDE

### 1.2.9.1 ERFOLG

ERFOLG scheint eine zentrale Konstituente innerhalb der Konstruktion von UNTERNEHMENS-IDENTITÄT zu sein, was die Kookkurrenz von *\*erfolg\** und *Selbstverständnis* nahelegt:

Die Grundlage unseres Geschäftserfolgs ist unser Selbstverständnis als Pionier: Wir beschreiten Neuland und stoßen auf Wachstumsmärkte vor, denken grenzübergreifend und betrachten jede Herausforderung aus unterschiedlichen Perspektiven. (Siemens GB 2010)

Insgesamt ist *Erfolg* auch *Keyword* sowie Hochfrequenzwort im Korpus (529x); auf der lexikalischen Ebene werden diverse Bildungen mit dem Morphem *\*erfolg\** (2.555x) aufgefün-

---

<sup>289</sup> Laut Kläßen (1999, 49) wisse die Gesellschaft von dieser Problematik, akzeptiere Unternehmen aufgrund ihres Nutzens jedoch, wenn das Gewinnstreben nicht gegen bestehende Werte und Normen verstoße.

<sup>290</sup> Vgl. dazu auch: „Die Wahrnehmung gesellschaftlicher Verantwortung hat für E.ON einen hohen Stellenwert.“ (E.ON Cleaner and better energy).

<sup>291</sup> Vgl. dazu Keller (1990, 42): „Zum einen erfolgt Identität über Kommunikationsprozesse, zum anderen muß ein Mensch mit der Umwelt kommunizieren, um als Individuum erkannt zu werden. Die Anerkennung mit der Umwelt, die positive Akzentuierung ergibt sich aus der sozialen Identität, nämlich der Übereinstimmung mit den Wertvorstellungen der Bezugsgruppe und der Kontinuität des Verhaltens.“.



den. Als erste Konstituente taucht *Erfolg*\* in Komposita auf, welche das Konzept ›mentale Erfolgsfertigkeiten‹ beschreiben:

Unsere Unternehmenskultur verbindet Erfolgsorientierung mit Weltoffenheit, Vertrauen und Transparenz. (BMW GB 2010)

In der Funktion eines evaluativen Adjektivs wird *Erfolg*\* zudem in Metaphern eingesetzt, die das Konzept ›kohärenter Erfolgsplan des Unternehmens‹ aufrufen, z.B. *Erfolgsweg/-kurs*:

Auf der Basis starker Marken setzt der Volkswagen Konzern mit faszinierenden Produkten seinen automobilen Erfolgsweg fort. (VW Zahlen.Daten.Fakten)

In Anklang an die narrativen Strukturen im Diskurs (→ 8.4.2.4) finden sich auch die Metaphern *Erfolgsgelheimnis* und *Erfolgsgeschichte*:<sup>292</sup>

Es sind bis heute der gemeinsame Schulterschluss, das Vertrauen ineinander und die gemeinsamen Werte, die diese einzigartige Erfolgsgeschichte ermöglicht haben. (Merck Einzigartig – Der Merck Weg)

Des Weiteren fallen die Komposita *Erfolgsmo~~del~~l*<sup>293</sup>, *Erfolgskonzept*<sup>294</sup> sowie *Erfolg~~sf~~aktor*\* auf (›Erfolg~~sf~~aktoren‹), wobei besonders *Erfolg~~sf~~aktor*\* häufig auftritt und mit verschiedenen inhaltlichen Füllungen in Verbindung gebracht wird: In den Belegen werden besonders ‚Mitarbeiter‘ (+ *Vielfalt* oder *Engagement*) als ›Erfolg~~sf~~aktoren‹ behandelt:

Auch wenn Shanghai niemals zur Ruhe kommt, wollen sie jetzt schnell ins Bett. Denn morgen früh heißt es wieder: voller Einsatz für ihren Media Markt. Das Engagement der Mitarbeiter ist ein wichtiger Erfolg~~sf~~aktor für das Wachstum der METRO GROUP. (Metro GB 2010)

Weitere Attribute, die unter ›Erfolg~~sf~~aktoren‹ gruppiert werden, sind ‚Technologie- und Innovationsfähigkeit‘, ‚Produktqualität‘, ‚Nachhaltigkeit‘ und ‚unternehmerische Verantwortungsübernahme‘<sup>295</sup>. Als zweite Konstituente innerhalb der großen Beleganzahl von Komposita dient \**erfolg* als Bedeutungsträger und evoziert das Konzept ›Erfolgsart‹: Fast ausschließlich ist die ›Erfolgsart‹ der ‚Unternehmenserfolg‘ (oft in Konkurrenz mit den Verben *sichern* oder *beitragen*):

Unser Ziel ist, unternehmerisches Handeln und die Erwartungen unserer Anspruchsgruppen (Stakeholder) in Einklang miteinander zu bringen. Nur so können wir den langfristigen Unternehmenserfolg sichern und für unsere Aktionäre Wert schaffen. (RWE GB 2010)

---

<sup>292</sup> METRO reflektiert zudem metasprachlich den Nutzen der *Erfolgsgeschichten*: „Zudem hat der Vorstand der METRO AG Ende 2010 eine Initiative gestartet, um den Erfahrungsaustausch innerhalb des Unternehmens zu fördern. Ein Kernelement sind die sogenannten „Success Stories“. [...]. Die Erfolgsgeschichten benennen nicht nur die konkreten Schritte von der Ideenentwicklung bis zur Umsetzung. Sie belegen darüber hinaus die Wirkung von Shape 2012 und sollen Mitarbeiter dazu motivieren, eigene Projekte anzustoßen.“ (Metro GB 2010).

<sup>293</sup> Vgl. dazu: „Viele einzelne Teile, die sich ergänzen und ein starkes Ganzes ergeben – so funktioniert, kurz gesagt, unser Erfolgsmo~~del~~l. Unter dem gemeinsamen Konzerndach bringen die Verbund-Airlines ebenso wie alle Geschäftsfelder ihre Stärken ein und lassen so ein kraftvolles Netzwerk entstehen.“ (Lufthansa GB 2010).

<sup>294</sup> Vgl. dazu: „Das Erfolgskonzept: Premiumleistungen aus einer Hand.“ (Daimler Das Unternehmen 2011).

<sup>295</sup> Vgl. dazu: „Gleichzeitig sind wir überzeugt, dass verantwortliches Handeln zum langfristigen Unternehmenserfolg beiträgt. Deshalb ist unternehmerische Verantwortung auch ein wichtiger Erfolg~~sf~~aktor zur Erreichung unserer langfristigen Ziele.“ (ThyssenKrupp GB 2010).

Metonymisch dazu befindet sich der ‚wirtschaftliche Handlungserfolg‘ der Unternehmen, der sprachlich als *Geschäftserfolg* oder *Markterfolg*<sup>296</sup> bezeichnet wird. Der Ausdruck *Erfolg* wird auch durch Attributionen mittels Adjektiven (*x Erfolg*) syntagmatisch spezifiziert, wodurch weitere sprachliche Anreicherungen von ›Erfolgsart‹ aufgedeckt werden. Wiederum ist hier am häufigsten ‚Unternehmenserfolg‘ realisiert:

In der Überzeugung, dass die Vielfalt der Belegschaft zu besseren Teamleistungen führt und damit zum unternehmerischen Erfolg beiträgt, haben wir Maßnahmen implementiert, um diese Vielfalt nachhaltig zu verankern. (Merck GB 2010)

Im folgenden Beleg wird das PRODUKT (‚automobiler Erfolg‘) metonymisch für das gesamte UNTERNEHMEN eingesetzt:

Zum automobilen Erfolg des Volkswagen Konzerns tragen auch die Finanzdienstleistungen unter dem Dach der Volkswagen Financial Services AG bei, deren Wurzeln bis in das Jahr 1949 zurückreichen. (VW Zahlen.Daten.Fakten)

Die makroökonomische Domäne, in welcher sich ‚Unternehmenserfolg‘ mikroökonomisch abspielt, benennt das Syntagma *wirtschaftliche\* Erfolg* (‚ökonomischer Erfolg‘):

Als weltweit führendes Chemieunternehmen verbinden wir wirtschaftlichen Erfolg mit gesellschaftlicher Verantwortung und dem Schutz der Umwelt. (BASF GB 2010)

Teilweise wird *wirtschaftliche\* Erfolg* um das vorangestellte Adjektiv *nachhaltig\** erweitert, wodurch das Attribut ‚nachhaltiger Erfolg‘ dominant gesetzt wird:

Wir streben herausragenden und nachhaltigen wirtschaftlichen Erfolg an. (Henkel Vision und Werte)

Die Fokussierung auf ‚nachhaltiger Erfolg‘ wird bei MERCK im folgenden Beleg daneben durch die Negation von *kurzfristige[r] Erfolg* ausgedrückt:

Unser Ziel ist die dauerhafte Geschäftsbeziehung, nicht nur der kurzfristige Erfolg. Auf dieser Grundlage handeln wir als selbstständiges Unternehmen ertragsorientiert. (Merck Leitbild)

Diese Dominantsetzung des Bedeutungsmerkmals ‚langfristig‘ bei MERCK bestätigen auch weitere Belege für das Syntagma *langfristige\* Erfolg*:

Wir sind davon überzeugt, dass gesellschaftliche Verantwortung ein unverzichtbarer Faktor für den langfristigen Erfolg unseres Unternehmens ist. (K+S Grundwerte)

HENKEL wertet im nachstehenden Beleg *kurzfristige Erfolge* jedoch als nötige Voraussetzung für einen *langfristigen Erfolg* auf und grenzt sich daher sprachlich von der Diskurstypik ab:

Der Wert „Familienunternehmen“ unterscheidet uns von anderen Unternehmen. Wir haben eine langfristige Perspektive. Aber es gilt auch: Ohne kurzfristige Erfolge gibt es keinen langfristigen Erfolg. (Henkel GB 2010).

Die folgenden Belege perspektivieren *nachhaltig\** durch den Kontext dagegen auch als ‚die Ökologie betreffend‘:

---

<sup>296</sup> Vgl. dazu: „Durch die Übernahme der „Auto Union GmbH“ und der „NSU Motorenwerke AG“ in den 1960er Jahren zum deutschen Automobilkonzern herangewachsen, machten der dynamische Markterfolg von Passat, Golf und Polo nach 1973 das weitere Unternehmenswachstum zur Multi-Brand-Group möglich.“ (VW Zahlen.Daten.Fakten).

Nachhaltiger Erfolg. Nachhaltiger Erfolg ist Ziel unserer Aktivitäten und Grundwert zugleich. Wir schaffen Werte für unsere Stakeholder und übernehmen dabei aktiv Verantwortung gegenüber Mensch, Gesellschaft und Natur. Wir nehmen Chancen wahr und gehen dabei mit Risiken sorgfältig um. (K+S Grundwerte)

Beim Syntagma *dauerhafte\* Erfolg* wird (im Gegensatz zu *nachhaltig\** oder *langfristig\**) nicht das Merkmal ‚langfristig‘ von ERFOLG betont, sondern die ‚Konstanz‘ dessen:

Die MAN Gruppe sichert ihren dauerhaften Erfolg, indem sie in allen wichtigen Regionen und Produktsegmenten weltweit tätig ist. (MAN GB 2010)

ERFOLG wird im Diskurs jedoch nicht nur temporal, sondern auch spatial spezifiziert – durch die Konstruktion *global\*/international\* + Erfolg* (‚weltweit‘):

Globale Marken, globaler Erfolg. (BDF Unser Profil)

Unser internationaler Erfolg beruht auf einer starken Basis: rund 283.000 Mitarbeiterinnen und Mitarbeiter in 33 Ländern der Erde, die sich jeden Tag aufs Neue für unser Geschäft und unsere Kunden begeistern. (Metro GB 2010)

Diskurstypische Formulierungsmuster werden letztlich auch durch die possessivische Rückbindung (*unser\* Erfolg*<sup>297</sup>) bedient, was besonders in den Belegen von HENKEL markant genutzt wird:

Wir erwarten von jedem Einzelnen eigenverantwortliches Handeln und ein hohes Leistungsniveau, um unseren Erfolg als Unternehmen zu sichern. (Henkel Vision und Werte)

Im Gegensatz zu den anderen Diskursthemen finden sich bei ERFOLG eher wenig positive Sachverhaltsbewertungen durch affektive, dimensionale oder evaluative Adjektive:

Infineon hat die Krise der letzten zwei Jahre mit außergewöhnlichem Erfolg bewältigt. (Infineon GB 2010)

Auf der Syntagmenebene werden ›Erfolgsträger‹ des Weiteren durch das relativ gefestigte Syntagma *Erfolg des X* aufgerufen. Diese Konstruktionen beziehen sich fast ausschließlich auf das ‚Unternehmen‘:

Merck möchte seinen Beschäftigten einen angemessenen Rahmen bieten, innerhalb dessen sie ihren individuellen Beitrag zum Erfolg des Unternehmens am besten leisten können. (Merck GB 2010)

LINDE verallgemeinert diese inhaltliche Aussage, indem der Ausdruckskomplex *Erfolg eines Unternehmens* an die Selbstperspektive rückgebunden wird (*für uns*):

Der Erfolg eines Unternehmens steht und fällt mit der Qualität und der Motivation seiner Mitarbeiter. Deshalb ist es für uns so wichtig, die richtigen Mitarbeiter am richtigen Platz zu haben. (Linde GB 2010)

Weitere ›Erfolgsträger‹ sind ‚Produkte‘ (→dieser Anhang, 1.7.1), ‚Marken‘ (→dieser Anhang, 1.7.2) oder ‚Ideen‘ (→dieser Anhang, 1.4.1). Neben den aufgeführten Genitivattributen sind musterhafte rechtsseitige Anschlüsse an *Erfolg* lokale Adverbialien (*Erfolg im/in X*), wodurch eine ›Erfolgslokalisierung‹ möglich wird:

Im Mittelpunkt steht eine starke und unverwechselbare Unternehmenskultur: eine „Winning Culture“, die durch ein klares Bekenntnis zu überdurchschnittlichen Leistungen und die Ausrichtung auf den Erfolg im Wettbewerb gekennzeichnet ist. (Henkel GB 2010)

---

<sup>297</sup> Vgl. dazu auch *gemeinsame\* Erfolg*: „Wir ermutigen unsere Mitarbeiter, ihre Kreativität für den gemeinsamen Erfolg des Unternehmens und seiner Stakeholder einzubringen.“ (K+S Grundwerte).

Das innovative Programm erhielt im September 2010 den internationalen Umweltpreis „ÖkoGlobe 2010“ in der Kategorie „Ökologischer Fuhrpark“ und soll – nach dem Erfolg in Deutschland – als Ansatz für zukünftige internationale Projekte dienen. (VW GB 2010)

Anschlüsse mit instrumentalen Adverbialien (*Erfolg durch X*), die anzeigen, was als ›Erfolgsauslöser‹ gilt, erscheinen außerdem regelhaft:

Wir sind der festen Überzeugung, dass Erfolg durch Innovation und engagiertes Handeln entsteht. (SAP GB 2010)

›Erfolgsauslöser‹ werden auch häufig in verblosen Formeln der Art *Erfolg durch X* realisiert, welche jedoch in ihrer inhaltlichen Aussagekraft relativ vage bleiben:

Erfolg durch Vielfalt. (Linde Der Linde Spirit)

Fach-, Sozial- und Managementkompetenz | „Erfolg durch Kompetenz“ (HeidelbergCement Unser Unternehmensleitbild)<sup>298</sup>

Linksseitige Anschlüsse, die regelhaft auftreten, sind metaphorisch gebrauchte Substantive, die *Erfolg* als Genitivattribut (*X des Erfolgs*) vorangestellt werden, z.B. *Instrumente*, *Bausteine*, (*Eck-*)*pfeiler* oder *Faktoren*:

Die Instrumente des Erfolgs – für den Automobilbauer wie für den Raumfahrer – sind langfristige strategische Planung, technologische Exzellenz und ein funktionierendes Team. (VW GB 2010) r

Solche Fügungen wurden unter dem Kapitel Metaphern (→ 8.4.3) bereits vertieft.

Begibt man sich analytisch auf die Satzebene, wird durch die Verbindung von *Erfolg* mit Verben das Konzept ›Erfolgshandlung‹ aufgerufen. Dabei wird ERFOLG als ›Erfolgszustand‹ einerseits dargestellt (durch die Verben *haben* oder *prägen*):

Denn nur wenn unsere Kunden erfolgreich sind, haben auch wir Erfolg. (HeidelbergCement Corporate Mission)

Ideen und Initiativen unserer Mitarbeiter und Führungskräfte prägen den Erfolg des Konzerns. (Thyssen-Krupp GB 2010)

Andererseits erscheint ERFOLG als ›planbarer Erfolgsprozess‹, was auch bei LINDE im *Geschäftsbericht 2010 (Ist Erfolg planbar?)* reflektiert wird. Folgende Belege suggerieren, dass Unternehmen (Mitarbeiter) ERFOLG durch ihre Handlungen mitbedingen können:

An der letzten Umfrage, die Anfang 2010 in 28 Sprachen durchgeführt wurde, nahmen 84 % der Beschäftigten teil. Die Gesamtergebnisse belegen, dass sich die Mehrheit der Beschäftigten stark mit Merck identifiziert und sich engagiert für seinen Erfolg einsetzt. (Merck GB 2010)

Als weitere ›Erfolgshandlung‹ präsentiert sich die ›Erfolgssicherung‹, da sich das Verb *sichern* musterhaft in Konkurrenz mit *Erfolg* (unter dem Attribut ›planbarer Erfolgsprozess‹) findet:

Wir sichern unseren Erfolg von morgen durch Forschung und Entwicklung von heute. (MAN Unternehmensleitbild)

In Anlehnung an den Rationalitätstopos der WIRTSCHAFT wird ›Erfolgssicherung‹ infolgedessen auch an ›Erfolgsmessbarkeit‹ gebunden:

---

<sup>298</sup> Vgl. dazu auch: „Erfolg durch Nähe. Wir wissen, was unsere Verbraucher bewegt.“ (BDF Unser Profil).

Der Erfolg lässt sich quantifizieren: Für die Deutsche Post ermittelte das Beratungsunternehmen Semion Brand-Broker 2010 einen Markenwert von 12.692 MIO € – wie im Vorjahr Platz sechs im Ranking der wertvollsten deutschen Marken. (Deutsche Post GB 2010)

Wir wollen den Wert unseres Unternehmens nachhaltig steigern. Das können wir nur, wenn wir Wertschöpfung in einem umfassenden Sinne verstehen und den Erfolg unserer Geschäftstätigkeit nicht nur an finanziellen Kennzahlen, sondern auch an deren gesellschaftlicher Akzeptanz messen. (Daimler GB 2010)

Im nächsten Schritt muss auf der Satzebene das Prädikatsadjektiv *erfolgreich\** (758 Hits) beleuchtet werden, das in der Verbindung mit *sein* wiederum das Attribut ‚Erfolgszustand‘ dominant setzt:

WENN MAN SEIT ÜBER 300 JAHREN ERFOLGREICH AM MARKT IST, MUSS MAN SCHON EIN PAAR DINGE RICHTIG GEMACHT HABEN. (Merck Einzigartig – Der Merck Weg)<sup>299</sup>

Der konstituierte ERFOLGSZUSTAND soll aufrecht erhalten werden, was Finalsätze, *zu*-Infinitive sowie Konditionalsätze anzeigen, die BEDINGUNGEN für den ERFOLGSZUSTAND aufstellen:

Fresenius Medical Care verfolgt parallel vier Ansätze, um im weltweiten Dialysemarkt erfolgreich zu sein. (FMC GB 2010)

Auffallend ist in vielen Belegen das Auftreten des Adverbs *nur*, das eine Ausschließlichkeit ausdrückt, d.h. keine außer der vom Unternehmen aufgestellten BEDINGUNGEN kann zum ERFOLG führen. Normativ zugespitzt zeigen sich diesbezüglich auch folgende Aussagen:

Nur wer nachhaltig wirtschaftet, kann auf Dauer erfolgreich sein. (BMW Verhaltenskodex)

*Erfolgreich* attribuiert jedoch ebenso andere Verben, wobei ERFOLG wiederum als ‚planbarer Erfolgsprozess‘ präsentiert wird:

Der Schutz der Umwelt und der schonende Umgang mit natürlichen Ressourcen sind wesentliche Voraussetzungen, um langfristig erfolgreich wirtschaften zu können. Als Technologieführer leistet MAN durch umwelt- und klimafreundliche Produkte sowie Produktionsprozesse einen positiven Beitrag für Umwelt und Gesellschaft. (MAN GB 2010)

In Verbindung mit *machen* wird dabei häufig der Komparativ *erfolgreicher* eingesetzt:

Das Vertrauen unserer Verbraucher und starke Marken wie NIVEA, La Prairie und Eucerin machen Beiersdorf weltweit immer erfolgreicher. (BDF Imagebroschüre)

Der Vollständigkeit wegen muss noch auf die ›Erfolgsträger‹ eingegangen werden (s.o.), die durch *erfolgreich\** + Substantiv angezeigt werden, denn durch diese Konstruktion findet nicht nur eine Sachverhaltsverknüpfung, sondern auch eine Festsetzung statt. Besonders stark scheint die Aussagekraft solcher Konstruktionen am Satzbeginn unter generischer Formulierung:

Erfolgreiche Unternehmen wissen, wie man Chancen erkennt – und nutzt. Was zählt, sind transparente Informationen, Handlungsfähigkeit und Geschwindigkeit. Genau darum setzen Firmen jeder Größe und in allen Branchen auf SAP. (SAP GB 2010)

---

<sup>299</sup> Vgl. dazu auch die Realisierung im Plural: „Wir sind stolz darauf, wenn aus guten Ideen neue Produkte entstehen. Produkte, mit denen nicht nur wir, sondern auch unsere Kunden dauerhaft erfolgreich sind.“ (Merck Einzigartig – Der Merck Weg).

Erfolgreiche Börsen sind heute viel mehr als nur Marktorganisatoren: Sie sind Technologiedienstleister. Hier liegt eine der Kernkompetenzen der Deutschen Börse. Sie ist ein international führender Komplettanbieter für Entwicklung und Betrieb von Software für Börsen und Handelsteilnehmer. (Die Gruppe Deutsche Börse Vom Parkett zum elektronischen Handelsplatz)<sup>300</sup>

Beleuchtet man schließlich die Textebene, fallen diverse bildhafte Konzeptualisierungen des Sachverhalts ERFOLG auf, was bereits in Bezug auf Metaphern zu Beginn angesprochen wurde. Durch Metaphern werden ›Erfolgswerkzeuge‹ anschaulich präsentiert. Seriell gebraucht wird dabei der ‚Schlüssel‘ (in Bezug auf MITARBEITER):

Der Schlüssel zu unserem Erfolg sind unsere Mitarbeiter: Ihre Leidenschaft, ihr Pioniergeist und ihre Kompetenz haben uns an die Spitze gebracht. (BASF Gemeinsam Zukunft gestalten)

Ähnlich zu *Schlüssel* sind in ihrer Semantik die Ausdrücke *Instrument* oder *Faktor*:

Innovationen sind Motor für Wachstum und Wettbewerbsfähigkeit und damit strategisches Instrument für den nachhaltigen Unternehmenserfolg. (ThyssenKrupp GB 2010)

Auch *Motor*, *Treiber* und *Antrieb* sind Metaphern, die als ‚physische Elemente‘ erfolgsantreibend sind:

Es geht um die Gedanken, Emotionen, Bedürfnisse und Erfahrungen der Kunden. Sie sind der Antrieb für den Erfolg der Telekom. (Telekom Die Unternehmenswerte der Deutschen Telekom)

Diskurstypische Metaphern finden sich bei ERFOLG außerdem durch die *Grund\*/-Basis-/Fundament*-Metaphern, die relativ homogen realisiert werden:

Nachhaltiges Wirtschaften ist die Basis für unseren langfristigen Erfolg. (HeidelbergCement GB 2010)

Ebenfalls die Verben *basieren/fußen/beruhen* drücken diese Metaphorik aus:

Der Erfolg unserer Forschungs- und Entwicklungsaktivitäten basiert auf den Fähigkeiten unserer hoch qualifizierten Mitarbeiter. (Henkel GB 2010)

Die metaphorischen Konstruktionen offenbaren wiederum die dominante Verknüpfung von ERFOLG und MITARBEITER. Weitere kausale Verknüpfungen finden sich auf der Satzebene in der Relation  $X \rightarrow \text{ERFOLG}$  auch bei  $\text{INNOVATION} \rightarrow \text{ERFOLG}$ <sup>301</sup>,  $\text{TECHNIK/PRODUKTE} \rightarrow \text{ERFOLG}$ ,  $\text{QUALITÄT} \rightarrow \text{ERFOLG}$ <sup>302</sup>,  $\text{LEISTUNG} \rightarrow \text{ERFOLG}$ <sup>303</sup>,  $\text{VERANTWORTUNG} \rightarrow \text{ERFOLG}$  sowie  $\text{NACHHALTIGKEIT} \rightarrow \text{ERFOLG}$ . Demnach wird ERFOLG wiederholt kausal mit anderen Sachverhalten verbunden, indem die Verbindungen ERFOLG als ZIEL bestimmen.

Dieses Kapitel veranschaulichte damit, dass Unternehmen ERFOLG permanent als ZIEL (‚planbarer Erfolgsprozess‘) konstituieren, aber gleichsam auch einen dauerhaften ERFOLG (‚Erfolgszustand‘) präsentieren wollen, indem sie sich durch die Darstellung von (vergange-

---

<sup>300</sup> Vgl. dazu auch: „Das erfolgreiche Geschäftsjahr 2010 verstehen wir aber nicht als Abschluss, sondern als Zwischenstation auf unserem Weg zum dauerhaften Unternehmenserfolg.“ (Infineon GB 2010).

<sup>301</sup> Vgl. dazu: „Wir untermauern unseren Anspruch, als Erfinder-Unternehmen in forschungsintensiven Bereichen Zeichen zu setzen. Denn Innovationen schaffen die Basis für Wettbewerbsfähigkeit und Wachstum und damit für den Erfolg des Unternehmens in der Zukunft.“ (Bayer Namen.Zahlen.Fakten 2010/2011).

<sup>302</sup> Vgl. dazu: „Höchste Qualität und ständige Qualitätsverbesserung sind wesentlich für Wachstum und Erfolg des Unternehmens.“ (Daimler Verhaltensrichtlinien).

<sup>303</sup> Vgl. dazu: „Ziel ist eine vertrauensvolle Führungskultur – die Basis für herausragende Leistungen eines jeden Mitarbeiters und damit für den Erfolg von MAN.“ (MAN GB 2010).



nem) ERFOLG anpreisen. Vor allem erfolgt diese „Qualifizierung“ (Stockinger 1998, 28) über die Bezugsrahmen MITARBEITER, PRODUKTE, INNOVATIONEN und QUALITÄT. Der ERFOLG wird expandiert<sup>304</sup>, indem Unternehmen diesen in die Zukunft weitertragen („langfristig“), mit dem Ziel, den Erfolgsstatus zu „perennisieren“ (Stockinger 1998, 27). Es geht dabei meist um die Fortsetzung eines bereits gegangenen *Erfolgsweges* oder einer *Erfolgsgeschichte*, d.h. vielmehr um ein Aufrechterhalten einer bereits erfolgten erfolgreichen Qualifikation als um eine neue Wendung.<sup>305</sup> So dient ERFOLG dem permanenten Sinnstreben der Unternehmen.

### 1.2.9.2 INNOVATION

INNOVATION ist besonders bei den Technologieunternehmen SIEMENS, INFINEON, TELEKOM sowie SAP ein dominantes Thema innerhalb ihrer Identitätskonstruktion. Beispielsweise verknüpft SIEMENS bereits auf Wortebene *Unternehmens- und Innovationsgeschichte*:

Unsere Mitarbeiter haben mit ihren Erfindungen und Ideen die Welt verändert. Wir führen damit konsequent unsere mehr als 160-jährige Unternehmens- und Innovationsgeschichte fort. (Siemens Unsere Werte)

Die thematische Salienz von INNOVATION zeigt sich jedoch nicht nur durch eine hohe Wortbildungsproduktivität von *\*innovati\** (1.236 Hits) auf der lexikalischen Ebene, sondern auch durch Sprachthematisierungen:

Im Jahr 2010 wurde im Vorstand der E.ON AG ein eigenes Vorstandsressort für Technologie eingerichtet. Dieses unterstreicht die Bedeutung, die wir dem Thema Innovation im Energiebereich beimessen. (E.ON GB 2010)

Substantivische Komposita, in denen *Innovation\** als erste Konstituente auftaucht, beziehen sich speziell auf ›kompetitive Innovationsmeseinheiten‹, die als Indikatoren der unternehmerischen Auseinandersetzung mit INNOVATION dienen, z.B. *Innovationswettbewerb\**<sup>306</sup>, *Innovationsrate\**, *Innovationgrad*<sup>307</sup> sowie *Innovationspreis\** oder *-award\**<sup>308</sup>. Besonders bei HENKEL finden sich dabei Begriffsbesetzungen durch die Nutzung des Eigennamens:

Jedes Jahr verleihen wir für eine Reihe von außergewöhnlichen Entwicklungen den „Fritz-Henkel-Preis für Innovation“. (Henkel GB 2010)

Darüber hinaus haben wir zum Wintersemester 2010/2011 – nach einem erfolgreichen Abschluss der dritten Staffel – eine weitere Runde unseres Innovationswettbewerbs für Studierende, „Henkel Innovation Challenge“, in 14 europäischen und vier asiatischen Ländern gestartet. (Henkel GB 2010)

---

<sup>304</sup> Vgl. dazu die narrative Expansion der Erfolgsgeschichte bei Stockinger (1998, 31).

<sup>305</sup> Das Unternehmen bewertet seinen Status/seine Handlungen in der Vergangenheit aus der Retrospektive als *Erfolgsgeschichte* und befindet über seinen zukünftigen ERFOLG. Dies wird auch betont durch die Adverbien *weiterhin/weiter* oder Kontinuitätsverben (*fortsetzen, schreiben weiter*) im Kontext von *Erfolgsgeschichte*.

<sup>306</sup> Vgl. dazu: „Im ThyssenKrupp Innovationswettbewerb 2010 erhielt das Konzept den Sonderinnovationspreis „Energie und Umwelt“.“ (ThyssenKrupp GB 2010).

<sup>307</sup> Vgl. dazu: „Der hohe Innovationsgrad von Removab wird durch die Verleihung des Galenus-von-Pergamon-Preises im Oktober 2010 in der Kategorie Specialist Care eindrucksvoll unterstrichen“ (Fresenius GB 2010).

<sup>308</sup> Vgl. dazu: „Seit 2006 fördert Linde den Erfindergeist und die Kreativität seiner Mitarbeiter durch die so genannten Patent & Innovation Awards.“ (Linde GB 2010).

Durch das Kompositum *Innovationsführer\** wird ein Unternehmen nicht nur im INNOVATIONSWETTBEWERB lokalisiert, sondern schreibt sich darin eine tragende Rolle zu:

Unsere Rolle als Innovationsführer behaupteten wir im vergangenen Jahr. (Telekom T-Spirit – Das Leitbild der Deutschen Telekom)

Diese Rollenzuschreibung wird teilweise mit BEISPIELEN (*Innovationsprojekten*) validiert:

Einen deutlichen Beweis für ihre Innovationsführerschaft erbrachte Lufthansa Cargo im Februar 2010: Mit gleich drei Projekten war sie im Spitzencluster-Wettbewerb der Bundesregierung erfolgreich, der die Förderung von Innovationsprojekten zum Ziel hat. (Lufthansa GB 2010)

Des Weiteren evozieren Komposita mit *Innovation\** als erster Konstituente ›physikalische Einheiten der Innovationsintensität‹, etwa *Innovationskraft*, *Innovationsstärke*<sup>309</sup> und *Innovationsleistung*<sup>310</sup>. Daneben zeigen sich Ausdrücke, die das Konzept ›Innovationsperioden‹ ausdrücken, etwa *Innovationszyklen*<sup>311</sup>, *Innovationsprozess*<sup>312</sup> oder *Innovationstreiber*:

Unser Ziel ist es, eine Unternehmenskultur zu fördern, die auf unternehmerischer Mitverantwortung basiert und die Balance zwischen hocheffizientem Serviceunternehmen und kreativem Innovationstreiber schafft. (Telekom GB 2010)

Durch die Metapher *Innovationstreiber* wird eine Rollenzuschreibung von TELEKOM aus der Selbstperspektive vorgenommen. Eine weitere Konzeptgruppe, die sich durch die Kompositionanalyse offenbart, sind ›Innovationsträger‹, die von Unternehmen genannt, jedoch häufig nicht spezifiziert, sondern generisch durch *Innovationsprojekt\** oder *-arbeit\** betitelt werden:

Mit gleich drei Projekten war sie im Spitzencluster-Wettbewerb der Bundesregierung erfolgreich, der die Förderung von Innovationsprojekten zum Ziel hat. (Lufthansa GB 2010)

Der Erfolg der Innovationsarbeit spiegelt sich auch in zahlreichen Auszeichnungen für das Unternehmen, die Produkte und Mitarbeiter wider. (Telekom GB 2010)

Spezifischer wird auf ›Innovationsträger‹ bei RWE eingegangen, indem *Innovationsprojekte* ikonisch abgebildet werden:

---

<sup>309</sup> Vgl. dazu: „Innovationsstärke demonstrierte Audi zudem mit der Weiterentwicklung seines Bediensystems – des MMI touch – sowie mit dem Sicherheitssystem Audi pre sense, einem präventiven Insassenschutz, und den wegweisenden Voll- LED-Scheinwerfern.“ (VW GB 2010). Vgl. dazu auch die adjektivische Ausführung: „Mit Innovationsraten von jeweils rund 40 Prozent in den Unternehmensbereichen Wasch-/Reinigungsmittel und Kosmetik/Körperpflege und von etwa 24 Prozent im Unternehmensbereich Adhesive Technologies zählen wir zu den innovationsstärksten Unternehmen in unseren Kompetenzbereichen.“ (Henkel GB 2010).

<sup>310</sup> Vgl. dazu: „Das unabhängige Center of Automotive Management (Cauma) hat 2010 zum fünften Mal die Innovationsleistung der Automobilindustrie weltweit analysiert und dabei festgestellt, dass wir unsere Innovationsaktivitäten mit den beiden Marken Volkswagen und Audi im Vergleich zu den Vorjahren nochmals deutlich steigern konnten.“ (VW GB 2010).

<sup>311</sup> Vgl. dazu: „Die Innovationszyklen verkürzen sich.“ (Telekom GB 2010).

<sup>312</sup> Vgl. dazu: „Die Vision vom vernetzten Leben und Arbeiten ist der rote Faden für unseren Innovationsprozess.“ (Telekom GB 2010).

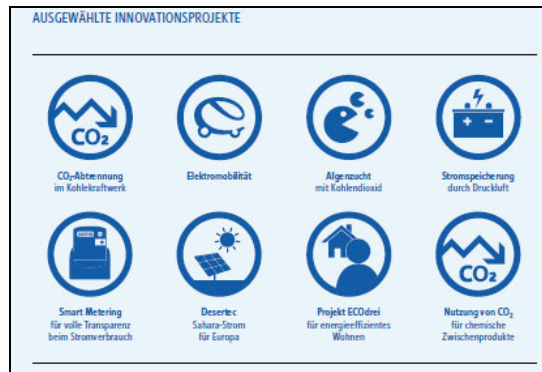

Abbildung 102 - RWE GB 2010

Diese ›Innovationsträger‹ werden rückwirkend von ›Innovationsinstanzen‹, auf welche vielfach eingegangen wird, im Unternehmen festgelegt (*Innovationsmanagement* etc.):

Unser Unternehmensbereich Produkte & Innovationen (Products & Innovation) verantwortet unsere Innovationen und Produktentwicklungen von der konzernweiten Forschung & Entwicklung über das Innovationsmanagement und –marketing [...]. (Telekom GB 2010)

Dazu zählen auch solche kollektiven Instanzen, die als Zusammenschlüsse des Wissens um INNOVATION gelten können (›Innovationskollektive‹):

Gemeinsam mit den Fachbereichen gelang es uns, im Jahr 2010 zahlreiche neue Interne Trainings aufzusetzen und mit den Aktivitäten „Innovation Fab“, „Innovation Star“ und den daraus resultierenden „ICommunities“ den Wissenstransfer zu fördern. (Infineon GB 2010)

Der Linde Innovators Club zählt inzwischen mehr als 100 Mitglieder. (Linde GB 2010)

Neben dem temporalen Konzept ›Innovationsperioden‹ wird INNOVATION von Unternehmen auch lokal durch ›Innovationsräume‹ fixiert (*Innovation Center, House of Innovation*<sup>313</sup>). Schließlich evozieren Komposita mit *Innovation\** auch das Konzept ›mentale Innovationsfertigkeiten‹:

MAN ist ein Erfinderunternehmen. Wir wissen darüber hinaus aber auch, wie man neue Märkte entwickelt und erschließt. Diese beständige Innovations- und Wandlungsfähigkeit hat uns zu einem Vorreiter in der Transport- und Energieindustrie gemacht. (MAN Unternehmensleitbild)

*Innovationsfähigkeit* bezieht in diesem Beleg von MAN auf bestimmte EIGENSCHAFTEN des Unternehmens, um die Anforderungen zur Leistung von INNOVATION zu erfüllen. HEIDELBERGCEMENT erhebt dazu ein *Innovationsbekenntnis*:

Das Heidelberger Innovationsbekenntnis. Wir bauen auf neue Technologien. Weil wir Zukunft damit aktiv gestalten. (HeidelbergCement Corporate Mission)

Der Ausdruck *Innovationskultur* betont bei FRESenius MEDICAL CARE die kultursymbolische Aufwertung von INNOVATION:

Als weiteren Erfolgsfaktor für unsere Forschung und Entwicklung sehen wir eine offene Innovationskultur, insbesondere den lebendigen fachlichen, kreativen und menschlichen Austausch, sowohl intern als auch außerhalb des Unternehmens. [...] Zu unserer Innovationskultur gehört auch, dass wir verantwortungsvoll forschen und entwickeln. (FMC GB 2010)

<sup>313</sup> Vgl. dazu das THYSENKRUPP *House of Innovation* unter den Raummetaphern (→ 8.4.3.4).

Kaum tauchen im Korpus Komposita mit *\*innovation* als zweiter Konstituente auf, die ›Innovationsart‹ aufrufen (z.B. ‚Produktinnovation‘).<sup>314</sup> Diese Tatsache liegt sicherlich daran, dass das Konzept ›Innovationsart‹ vor allem über den Plural *Innovationen* ausgedrückt wird.<sup>315</sup> Diese Semantik wird im syntagmatischen Bereich mittels *x Innovationen* genutzt, wenn ›Innovationsart‹ aufgerufen und sich dabei auf konkrete DINGE (PRODUKTE) bezogen wird:

Ideen, Erfindungen, Patente – seit Gründung der »Telegraphen-Bauanstalt von Siemens & Halske« im Jahr 1847 prägen technische Innovationen und Spitzenleistungen den Erfolg unserer Marke. (Siemens Unsere Werte)

Durch Adjektivattribute zeigen sich natürlich auch Bewertungen von INNOVATION an. Im Vergleich zu den diskurstypischen Mustern der Sachverhaltsbewertung wird diese hierbei relativ neutral vorgenommen (z.B. *überzeugend/bedeutende Innovation/en*).<sup>316</sup> Dagegen finden sich auf syntagmatischer Ebene häufig die adjektivischen Metaphern *richtungsweisend\** oder *zukunftsweisend\** als Attribute, welche das Konzept ›Innovationsart‹ ‚prospektiv‘ annoncieren:

Daimler wird auch weiterhin mit richtungsweisenden Innovationen die Mobilität der Zukunft immer sicherer gestalten. (Daimler Unternehmensinformationen 2010)

Das sich stetig verändernde Wettbewerbsumfeld erfordert mehr denn je zukunftsweisende Innovationen. Deshalb investieren wir bis zum Jahr 2015 über 1 Mrd. EUR in neue Produkte: Europa-Kabine, Inflight Entertainment- System oder FlyNet an Bord, der Ausbau der Gates in Frankfurt und des Münchner Terminals 2 oder die Erweiterung des Lounge-Angebots am Boden – momentan sind so viele Neuerungen gleichzeitig in Planung und in Arbeit wie noch nie zuvor. (Lufthansa GB 2010)

Innerhalb der Syntagmen ist ebenso die Versprachlichung des Sachverhalts INNOVATION durch das Adjektiv *innovativ\** + Substantiv zu beleuchten, wodurch ›Innovationsträger‹ angezeigt werden. Es handelt sich dabei besonders um ‚Unternehmen‘ sowie ‚Produkte‘:

Bayer HealthCare gehört zu den weltweit führenden innovativen Unternehmen in der Gesundheitsversorgung mit Arzneimitteln und medizinischen Produkten. Ziel des Teilkonzerns ist es, innovative Produkte zu erforschen, zu entwickeln, zu produzieren und zu vertreiben, um die Gesundheit von Mensch und Tier weltweit zu verbessern (z.B. Consumer Care, Medical Care). (Bayer Namen.Zahlen.Fakten 2010/2011)

Das Konzeptattribut ‚Produkte‘ wird dabei auch weiter spezifiziert, indem Hyponyme zu *Produkte\** auftauchen (u.a. auch *innovative Technologien* und *innovative Leistungen*):

---

<sup>314</sup> Vgl. dazu: „HeidelbergCement investiert auch erheblich in Produktinnovationen. [...] Konzernweit gibt es bereits zahlreiche Produktinnovationen für nachhaltiges Bauen, wie beispielsweise die wasserdurchlässigen Betonpflastersteine AquaFlow®, die etwa beim Hochwasserschutz eingesetzt werden können, oder den photokatalytisch aktiven Zement TioCem®, der bei Lichteinwirkung Stickoxide und andere Luftschadstoffe zersetzt.“ (HeidelbergCement GB 2010).

<sup>315</sup> Ebenso durch Kovorkommen mit *Produkt\** und *Technologie\** wird diese Semantik explizit: „Unser Unternehmensbereich Produkte & Innovationen (Products & Innovation) verantwortet unsere Innovationen und Produktentwicklungen von der konzernweiten Forschung & Entwicklung über das Innovationsmanagement und –marketing [...]“. (Telekom GB 2010). *Innovationen* ist Keyword und Hochfrequenzwort (*Keyword*-Rang 189; Frequenz 242x). Die bisher präsentierten Lexeme zu *Innovation\** evozierten dagegen den ‚Zustand der geplanten und kontrollierten Veränderung, der Neuerung in einem sozialen System durch Anwendung neuer Ideen und Techniken‘ (vgl. Duden 2001, 834).

<sup>316</sup> Vgl. dazu: „Überzeugende Innovationen.“ (BDF Unser Profil); „Als bedeutende Innovation der Deutschen Post ist im Jahr 2010 der e-Postbrief auf dem Markt eingeführt worden.“ (Deutsche Post GB 2010).

Henkel hat früh den zunehmenden Bedarf für hygienische Reinheit auch bei niedrigen Temperaturen erkannt. So haben wir in Europa erfolgreich die innovative Hygiene-Produktpalette für Universalwaschmittel eingeführt, in Italien beispielsweise Dixan Igiene e Purezza (Hygiene und Reinheit). (Henkel GB 2010)<sup>317</sup>

Schließlich wird durch das Muster *innovativ*\* + Substantiv auch das Konzept ›mentale Innovationsfertigkeiten‹ durch *innovative Ideen* oder *innovatives Denken* bedient:

Mit innovativen Ideen auf Basis bewährter Materialien will der neue Bereich Functional Films bei Bayer MaterialScience Visionen zum Leben erwecken und in Produkte für den Bedarf von morgen umsetzen. (Bayer Namen.Zahlen.Fakten 2010/2011)

Innovatives Denken und Handeln ist für uns unmittelbar mit unserem wirtschaftlichen Erfolg verknüpft. Neue Ideen für Konzepte und Formate sowie moderne Technologien helfen uns, noch besser auf die Bedürfnisse von Verbrauchern und Gewerbetreibenden eingehen zu können. (Metro GB 2010)

Zu den Syntagmen, die sich im Korpus musterhaft manifestieren, zählt außerdem das instrumentale Adverbiale *mit/durch (x) Innovation/en*, aufgrund dessen ›Innovation als Instrument für X‹ erscheint. X gilt dabei für:

- ‚Wettbewerbsdifferenzierung‘;

Mit Innovationen differenzieren wir uns vom Wettbewerb. (BASF GB 2010/Strategie und Werte)

- ‚Zukunft‘;

Der Daimler-Konzern. Mit Innovationen und Know-how setzen wir weltweit Maßstäbe für die Zukunft. (Daimler Das Unternehmen 2011)

- ‚Mehrwert‘;

Wir schaffen für unsere Kunden und Verbraucher Mehrwert durch Innovationen und legen damit gleichzeitig den Grundstein für weiteres Wachstum in all unseren Märkten. (Henkel GB 2010)

- ‚Erfolg‘;

Wir sind der festen Überzeugung, dass Erfolg durch Innovation und engagiertes Handeln entsteht. (SAP GB 2010)

- ‚Wachstum‘;

Unsere Wachstumschancen ergeben sich durch Innovationen, die Stärken unserer Präsenz in ausgewählten Märkten und durch Akquisitionen. (Merck Einzigartig – Der Merck Weg)

Wird die Präposition *für* hinter *Innovation/en* (*Innovation/en für X*) gestellt, können auch ›Innovationsadressaten‹ angeschlossen werden, was sich meist auf ‚Kunden‘ oder ‚Umwelt‘ bezieht:

Innovationen für unsere Kunden schaffen. (Linde Der Linde Spirit)

Das letzte zu behandelnde Muster auf der Syntagmenebene ist das Syntagma *X und Innovation*: X wird dabei häufig auf ‚Tradition‘ bezogen, was Delahaye (2009) als charakteristisch für die *Corporate History* zur Ausbildung einer genealogischen UNTERNEHMENSIDENTITÄT ansieht (→dieser Anhang, 1.15.1):

---

<sup>317</sup> Vgl. dazu auch: „Der neue Leichtbau-Trolley „Quantum“ bringt gegenüber herkömmlichen Modellen eine Gewichtsersparnis von bis zu 40 Prozent. Er wurde im Frühjahr von einer Jury internationaler Luftfahrtexperten als innovativstes Kabinenprodukt mit dem „Crystal Cabin Award“ ausgezeichnet.“ (Lufthansa GB 2010).

Tradition und Innovation. Die Wurzeln der heutigen MAN Gruppe sind die frühere Maschinenfabrik Augsburg-Nürnberg und der Gutehoffnungshütte Actienverein, der seinen Ursprung in der 1758 im Ruhrgebiet gegründeten St. Antony-Hütte hat. MAN blickt damit auf über 250 Jahre Unternehmensgeschichte zurück. (MAN Unternehmensleitbild)

Eine eher prospektive Ausrichtung erhält INNOVATION indessen durch das regelhaft genutzte Syntagma *Innovation und Wachstum* (‚Wachstum‘).

Auf der Satzebene finden sich – in Verbindung mit dem Adjektiv *innovativ*\* – relativ wenige musterhaft auftretende Verben. Eine Ausnahme bilden Aussagen der Technologieunternehmen INFINEON und SIEMENS, da beide Unternehmen die Form *innovativ sein* (›Innovation als unternehmensinhärenter Zustand‹), welche auch in ihren WERTEN auftaucht, verwenden:

We innovate – Wir sind innovativ. (Infineon Unsere Werte)

Wir sind innovativ, um dauerhaft Wert zu schaffen. (Siemens Unsere Werte)

Bei SIEMENS manifestieren sich zudem diverse *zu*-Infinitive, die den konstruierten INNOVATIONSZUSTAND gleichsam als ›Absicht‹ perspektivieren:

Verantwortungsvoll, exzellent und innovativ zu sein: Diese Ansprüche stellen wir an uns und unsere Arbeit. (Siemens Unsere Werte)

Außerdem entsteht dabei der Versuch, die Bedeutung von *innovativ zu sein* festzusetzen:

Innovativ zu sein lautet daher auch einer unserer drei Unternehmenswerte. Innovativ zu sein, sich stets auf diese Stärke zu besinnen und zu konzentrieren – diese Haltung wird unterlaufen durch eine Praxis, im Wettbewerb nicht mehr mit der besseren technischen Lösung oder dem besseren Produkt bestehen zu wollen, sondern Geschäftspartner unredlich zu beeinflussen, etwa durch Korruption. (Siemens GB 2010)

Auffallend ist in diesem Textbeleg – neben der prominenten Bindung des Sachverhalts INNOVATION an den Ausdruck *Unternehmenswerte* (und damit metonymisch an IDENTITÄT) die von SIEMENS getroffene antithetische Verknüpfung von INNOVATION und KORRUPTION. Durch diese Formulierung wird ein klarer Bereich des NICHT-SEINS geschaffen, wodurch IDENTITÄT durch Abgrenzung entsteht. Auch E.ON erzeugt durch die Nutzung des englischen Verbs *innovate*, das eine aktivische Perspektivierung anzeigt, und der Koppelung an den Unternehmensnamen *E.On* in der Kontamination *innovate.on* sprachliche Alleinstellung:

Zum anderen unterstützen wir durch unsere Technologieinitiative „innovate.on“ aktiv die Entwicklung von Schlüsseltechnologien und beschleunigen so deren Markteintritt. Dieses ist der Anspruch, den wir als eines der weltweit führenden Energieunternehmen an uns selbst stellen. (E.ON GB 2010)

Betrachtet man als nächstes die Satzsemantik innerhalb der Belege, taucht das Substantiv *Innovationen* häufig als Agens auf:

Innovationen leisten wichtige Beiträge, um die globalen Herausforderungen zu bewältigen, und sie sind wesentlicher Treiber für das künftige Wachstum von Bayer. (Bayer Namen.Zahlen.Fakten 2010/2011)

Auch der Singular *Innovation* wird in der semantischen Rolle des Agens eingesetzt:

Innovation treibt die Vernetzung der Produkte voran. (Telekom GB 2010)

Verbindungen mit dem Verb *sein* und der *Schlüssel*-Metapher finden sich daneben:



Innovation ist der Schlüssel für Verbesserungen. Wir wollen ständig besser werden. Wir begrüßen kreative Ideen und arbeiten daran, Probleme gar nicht erst entstehen zu lassen. (E.ON Unser Verhalten)

Innovationen sind der Schlüssel zu den Märkten von morgen und daher eine Daueraufgabe von Unternehmen. (Infineon GB 2010)

INNOVATIONEN sind somit SCHLÜSSEL für VERBESSERUNGEN oder MARKTEFFIZIENZ.<sup>318</sup> Damit sind sie das ZIEL, an dem die Unternehmenstätigkeit ausgerichtet wird (*Daueraufgabe von Unternehmen*). Die Verbindung von *Innovationen* in Konkurrenz mit den Verben *entwickeln* oder *ermöglichen* bestätigt diese These (u.a. ›Innovationshandlung‹ ‚Innovationsentwicklung‘):

Durch stetige Transformation unseres Wissens und unserer Erfahrung entwickeln wir konsequent Innovationen und Produkte [...]. (Merck Einzigartig – Der Merck Weg)

Der weltweite Austausch von Ideen, Know-how und Feedback von Kunden ermöglicht Innovationen, die allen zugute kommen. (ThyssenKrupp GB 2010)

Die Belege lassen dabei auch auf das zugrunde liegende Konzept ›Hilfe und Verbesserung durch Innovationen‹ schließen. INNOVATIONEN erscheinen als LÖSUNGEN jeglicher PROBLEME, was durch Zuspitzungen mittels *streben/Streben nach Innovationen* unterstrichen wird:

Wir streben nach Innovationen, die auch der Gesellschaft und Umwelt nutzen. (Lufthansa GB 2010)

Abschließend soll auf die Vielzahl von adjektivischen und substantivischen Synonymen bzw. Hyponymen eingegangen werden, die auf INNOVATION verweisen und durch dieses lexikalische Übergewicht die Bedeutung des Sachverhalts INNOVATION für UNTERNEHMENSIDENTITÄT erneut unterstreichen. Das Attribut ‚innovativ‘ wird etwa auch durch das Adjektiv *neu\** (+ *\*konzepte\**, *\*produkte\** oder *\*technologien\**) ausgedrückt:

Wir arbeiten intensiv daran, mit neuen Antriebskonzepten technische Grenzen auszureizen und Spielräume zu erweitern. (VW GB 2010)

Neuartige Technologien, insbesondere bei Erneuerbaren Energien, haben das Gesicht von E.ON in den vergangenen Jahren deutlich verändert. (E.ON Cleaner and better energy)<sup>319</sup>

Dabei finden sich häufig auch semantische Mehrfachbezüge auf das Merkmal ‚innovativ‘, indem die folgenden Ausdrücke gemeinsam auftreten:

Innovative Konzepte und visionäre Ideen, gepaart mit der unternehmerischen Weitsicht, auch Risiken einzugehen, um dauerhaft erfolgreich zu sein – diese Einstellung unseres Firmengründers Werner von Siemens hat uns zu einem erfolgreichen internationalen Anbieter von zukunftsweisenden Spitzentechnologien gemacht. (Siemens Unsere Werte)

LSG Sky Chefs setzt weiterhin verstärkt auf Differenzierung über Innovation und Umweltbewusstsein. Das Kreativpotenzial des Unternehmens zeigte sich auch 2010 in einer Reihe von neuen Produkten und Prozessoptimierungen, die sowohl von Branchenvertretern als auch branchenübergreifend anerkannt und prämiert wurden. (Lufthansa GB 2010)

---

<sup>318</sup> Des Weiteren bestehen Verknüpfungen zu RESSOURCEN, UMWELTSCHUTZ, WACHSTUM, WETTBEWERB und ERFOLG. Der Hinweis auf die kausale Relation INNOVATIONEN → X wird dabei auch mittels Verben wie *ermöglichen*, *schaffen* oder *führen* zu deutlich: „Innovationen und Partnerschaften führen zu hoher Produktqualität und Kundenbindung.“ (Lufthansa GB 2010).

<sup>319</sup> Vgl. dazu: „Der Anspruch, dass jedes neue Produkt bestmögliche Qualität mit der Verantwortung für Mensch und Umwelt verbindet, führt zu effizienteren Produkten und verbesserten technischen Lösungen.“ (Henkel GB 2010).

LUFTHANSA betont im letzten Beleg die Differenzierungsfunktion für das Unternehmen durch INNOVATION (*Differenzierung über Innovation*). Die ‚innovativen‘ (*neuen*) PRODUKTE von LUFTHANSA werden darüber namentlich spezifiziert und der Mehrwert dieser im Vergleich zu anderen oder ‚alten‘ PRODUKTEN (*herkömmlichen Modellen*) herausgestellt:

Der neue Leichtbau-Trolley „Quantum“ bringt gegenüber herkömmlichen Modellen eine Gewichtsersparnis von bis zu 40 Prozent. (Lufthansa GB 2010)

Es scheint, als ob das Attribut ‚innovativ‘ bzw. ‚neu‘ per se einer positiven Qualitätsbeurteilung gleichkommt (›neue/innovative Produkte sind automatisch besser‹ → dieser Anhang, 1.7.1). ‚Innovativ‘ wird durch solche sprachlichen Verdichtungen zum eigenen unhinterfragten Maßstab für Qualität, was auch durch diverse Substantivierungen (*Neue\**) angezeigt wird, die das ‚Neue‘ zum OBJEKT aufwerten:

Wir sind: offen für Neues: Zu unserem Verständnis von Leistung gehört es, Neuem gegenüber aufgeschlossen zu sein. Wir stellen Herkömmliches in Frage. Die Veränderungen, die die Globalisierung mit sich bringt, gehen wir offensiv an. (Deutsche Bank Leitbild und Marke)

Markenzeichen: Es verbildlicht, wie aus der Zusammenführung zweier Traditionsmarken etwas Neues, Wegweisendes und Modernes entsteht. (Commerzbank Die Marke der neuen Commerzbank)

*Neues* genügt in beiden Belegen als semantischer Kern und wird nicht durch Operatoren spezifiziert. Ebenso in sehr kurzen Sätzen mit vager Semantik wird dies offenbar:

Offen für Neues sein. (Bayer Leitbild)

Mut öffnet uns für das Neue. (Merck Merck Werte)

Paradoxerweise wird *neu\** auch gemeinsam mit Ausdrücken genutzt, die das Attribut ‚neu‘ durch ihre Semantik bereits enthalten. Diese Konstruktionen deuten jedoch nochmals auf die große Bedeutsamkeit des Aspektes ‚innovativ‘ im Diskurs hin:

BRIEFKOMMUNIKATION, DIE ZUKUNFT NEU GESTALTET. (Deutsche Post GB 2010)

Schließlich wird ‚innovativ‘ auch durch zahlreiche lexikalische Referenzen mittels *Neuentwicklung/Weiterentwicklung*<sup>320</sup> aufgegriffen. *Weiter\** evoziert dabei das Konzept ›kontinuierlicher Innovationsdrang‹, was auch in Verbkonstruktionen (*weiterentwickeln*<sup>321</sup>) zum Vorschein kommt, und von THYSSENKRUPP in seiner Bedeutung für die eigene UNTERNEHMENS-IDENTITÄT reflektiert wird:

Ständig weiterentwickelte Produkte, Prozesse und Dienstleistungen sind wesentliche Voraussetzungen für ein erfolgreiches Bestehen im Markt. Forschung und Entwicklung besitzen daher hohe Priorität für Thyssen Krupp. (ThyssenKrupp GB 2010)

---

<sup>320</sup> Vgl. dazu: „Neben der Neuentwicklung von Produkten und Verfahren sowie ihrer kontinuierlichen Weiterentwicklung, dem Sustaining Engineering, engagieren wir uns auch in der klinischen Forschung auf dem Gebiet des terminalen Nierenversagens, der Dialyse und technologisch verwandter blutreinigender Verfahren.“ (FMC GB 2010).

<sup>321</sup> Vgl. dazu: „Um Veränderungen im Kundenverhalten und Entwicklungen der digitalen Technologien innovativ zu begleiten, stellt sich die Deutsche Telekom kontinuierlich auf den Prüfstand und entwickelt ihre Vision und ihren Anspruch weiter.“ (Telekom Die Unternehmenswerte der Deutschen Telekom).

Das Partizip *weiterentwickelte* ist dabei keine Einzelerrscheinung bei THYSSENKRUPP, sondern findet sich auch in anderen Formen (*optimierte\**), die Ausdruck der *Vorwärtsstrategie* sind:

Neue Märkte und neue Technologien bilden zentrale Schlüssel unserer *Vorwärtsstrategie*. Mit ständig optimiertem Portfolio und immer höherer Effizienz wollen wir uns und unseren Kunden hierbei neue Perspektiven erschließen. (ThyssenKrupp GB 2010)

Zusammenfassend veranschaulichte dieses Kapitel, dass sich alle Unternehmen des Sachverhalts INNOVATION bedienen, um sich durch die Zufügung des Attributs ‚innovativ‘ eine besondere Qualitätskonvention zuzuschreiben. Dies gilt nicht nur für Technologieunternehmen, von denen noch neue unausgeschöpfte INNOVATIONEN zu erwarten sind, die gerade im *Online*-Bereich auch schneller vonstattengehen. Bei diesen ist der Sachverhalt daher stark mit TECHNOLOGIE und QUALITÄT verknüpft, da sie technik- und ergebnisorientiert sind (vgl. Reins 2006, 138). Diese Versprachlichung verhilft ihrer IDENTITÄT zur Wettbewerbspositionierung und Erhaltung ihrer Wettbewerbsfähigkeit (INNOVATIONEN → X). INNOVATION wird jedoch auch von den anderen Unternehmen vielfach genutzt, um PRODUKTE oder andere OBJEKTE ausdrucksseitig als *Innovation/en* zu etikettieren (sowie ein *Streben nach Innovation* zu proklamieren), was diese positiv aufwertet.<sup>322</sup> Das Attribut ‚innovativ‘ wird als positive Qualitäts- bzw. Produktbewertung auch derart überhöht, dass sich diverse sprachliche Verdichtungen, die das Merkmal transportieren (*neu\**, *weiter\** etc.) auffinden ließen, die im gemeinsamen Auftreten zwar tautologisch wirken, jedoch das zugrunde liegende Denkmuster nochmals veranschaulichen: INNOVATION dient, wie ERFOLG, als ZIEL dem permanenten Sinnstreben der Unternehmen.

### 1.2.9.3 WACHSTUM

WACHSTUM wird insbesondere von K+S, DEUTSCHE POST sowie Vw thematisiert und zeigt sich durch adjektivische Zuschreibungen mittels Zusammensetzungen (*wachstumsorientiert\**, *wachstumsstark\**) als ökonomische Konstante in Klassifikationen:

Als wachstumsorientiertes Unternehmen fokussiert sich Beiersdorf besonders auf Europa, Asien und Amerika und in allen Regionen insbesondere auf die Wachstumsmärkte. (BDF GB 2010)<sup>323</sup>

*Wachstum* ist *Keyword* und Hochfrequenzwort (*Keyword*-Rang 61; Frequenz 698x) und ruft in Komposita als Determinatum (*\*wachstum*) das Konzept ›Wachstumsart‹ auf. Dabei geht es besonders um ‚mikroökonomisch‘:

Während dazu in den vergangenen Jahren die Effizienz mit umfangreichen Maßnahmen gesteigert wurde, liegt nun der Fokus auf organischem Umsatz- und Ergebniswachstum. (Deutsche Post GB 2010)

---

<sup>322</sup> Ob dies tatsächlich auch zutrifft (inhaltsseitig), muss objektiviert werden (z.B. durch Patentanmeldungen, Patente pro Mitarbeiter, Produktivitätssteigerungen) (vgl. Kirchhoff 2001, 10) und kann aus dieser Perspektive nicht beurteilt werden.

<sup>323</sup> Vgl. dazu auch: „Mit unseren drei wachstumsstarken Unternehmensbereichen und den führenden Positionen, die wir sowohl in den reifen Märkten als auch in den Wachstumsregionen einnehmen, haben wir eine starke Basis für unser zukünftiges profitables Wachstum.“ (Henkel GB 2010).

Für ‚mikroökonomisch‘ steht auch wiederholt der Ausdruck *Unternehmenswachstum*. Weitere Komposita evozieren das Konzeptattribut ‚makroökonomisch‘ (*Marktwachstum*<sup>324</sup> oder *Wirtschaftswachstum*<sup>325</sup>). Die Mehrzahl der Komposita enthält *Wachstum\** als Determinans und ruft zahlreich ›Wachstumsorte‹ durch *Wachstumsregionen*, *Wachstumsmarkt/-märkte*<sup>326</sup> oder *Wachstumsfelder*<sup>327</sup> auf. Durch die Metaphern *Wachstumspfad* sowie *Wachstumskurs* werden auch gleichzeitig dynamische ›Bewegungen‹ im Raum angedeutet, welche das Unternehmen zum WACHSTUM hin vollzieht:

Auf Basis dieser im Jahr 2009 eingeführten Geschäftsstruktur wollen wir den profitablen Wachstumspfad in den nächsten Jahren fortsetzen. (Henkel GB 2010)

Die Weichen für die erfolgreiche Fortführung unseres Wachstumskurses haben wir schon gestellt: Im Zuge unserer Strategie, die den Ausbau der Kalikapazitäten und die Verlängerung der durchschnittlichen Lebensdauer der Bergwerke vorsieht, haben wir zu Beginn dieses Jahres die kanadische Potash One übernommen. (K+S GB 2010)

Insbesondere Vw nutzt den Phraseologismus *auf Wachstumskurs* häufig, der noch stärker die Angabe einer ›Wachstumsrichtung‹ dominant setzt:

Der russische Automarkt boomt. Mit vollständig in Russland produzierten Fahrzeugen ist Volkswagen auf Wachstumskurs. (VW GB 2010)

Des Weiteren finden sich zahlreich die kompositorischen Metaphern *Wachstumstreiber* und *Wachstumsmotor*, die das Konzept ›Wachstumskatalysation‹ aufrufen:

In der Spitzentechnologie made by Lufthansa sehen wir einen bedeutenden Wachstumstreiber und wichtigen Beitrag zur unternehmerischen Verantwortung. Mit großem Engagement arbeiten wir daran, sie vorausschauend und kontinuierlich weiterzuentwickeln – unabhängig von den Rahmenbedingungen. (Lufthansa GB 2010)

Asien bleibt der Wachstumsmotor für das Expressgeschäft. (Deutsche Post GB 2010)

Wenn WACHSTUM ‚katalysiert‘ werden soll, setzt dies auch eine ›exekutive Wachstumssteuerung‹ voraus, auf welche in vielen Belegen Bezug genommen wird, z.B. durch Komposita wie *Wachstumsstrategie*:

Ein wichtiger Bestandteil der langfristigen Wachstumsstrategie des Volkswagen Konzerns ist die effiziente Vermarktung von jungen Gebrauchtwagen. (VW GB 2010)

Das Syntagma *unsere\* Wachstumsstrategie* ist dabei dominant:

Ziel unserer Wachstumsstrategie ist es, unsere Führungsposition in den bestehenden Marktkategorien Anwendungen, Analytik und Mobile Lösungen auszubauen und uns in neuen Kategorien wie Cloud-Lösungen sowie Datenbanken und Technologie als Marktführer zu positionieren. (SAP SAP Auf einen Blick)

---

<sup>324</sup> Vgl. dazu: „Das Wachstum unserer operativen Unternehmensbereiche soll das jeweilige jährliche Marktwachstum um ein bis zwei Prozentpunkte übertreffen.“ (Deutsche Post GB 2010).

<sup>325</sup> Vgl. dazu: „Ob wir nachhaltig von einem stabilen und breiten Wirtschaftswachstum unterstützt werden, kann niemand verlässlich vorhersagen. Darauf haben wir keinen Einfluss.“ (Linde GB 2010).

<sup>326</sup> Vgl. dazu: „Insofern bleibt Stromerzeugung – darüber darf die krisengeprägte aktuelle Lage nicht hinwegtäuschen – ein langfristiger Wachstumsmarkt.“ (E.ON Cleaner and better energy); „Volkswagen ist heute der größte Autobauer in Südamerika, einem der wichtigsten Wachstumsmärkte.“ (VW GB 2010).

<sup>327</sup> Vgl. dazu: „DIE ERNEUERBAREN ENERGIEN GEHÖREN ZU DEN WICHTIGSTEN WACHSTUMSFELDERN VON RWE.“ (RWE GB 2010).

Partiell synonym werden die Ausdrücke *Wachstumsprogramm*<sup>328</sup> oder *Wachstumsinitiativen*<sup>329</sup> genutzt. Durch *Wachstumsziele* wird dabei ein konkretes ZIEL (= WACHSTUM) vorgegeben:

Wir sehen uns weiterhin sehr gut positioniert, um unsere Wachstumsziele zu erreichen. (FMC GB 2010)

Nicht nur durch den Ausdruck *Wachstumsziele* wird eine stark prospektivische Perspektivierung von WACHSTUM erreicht – bei der Belegdurchsicht offenbaren sich weitere Komposita, die auf konkrete ›Wachstumsvorhersagen‹ hindeuten, beispielsweise *Wachstumsmöglichkeiten*, *Wachstumsprognosen*<sup>330</sup>, *Wachstumsperspektiven*<sup>331</sup> sowie *Wachstumsaussichten*:

Aufgrund der guten Wachstumsaussichten hat HeidelbergCement seine Aktivitäten in Afrika weiter ausgebaut. (HeidelbergCement GB 2010)

Daneben sind weitere Ausdrücke mit dieser Perspektivierung – *Wachstumspotenzial* und *Wachstumschancen* – im Auftreten positiv konnotiert, indem sie das noch nicht eingetretene WACHSTUM als ‚sehr wahrscheinlich‘ zeichnen:

Den Schwerpunkt legen wir auf Märkte mit überdurchschnittlichem Wachstumspotenzial. (BDF Unser Profil)

Wir sehen klare Wachstumschancen in den Energiemärkten, in Europa, aber vor allem auch außerhalb Europas. Um dieses Wachstumspotenzial effizient zu nutzen, haben wir unsere Konzernstruktur neu aufgesetzt und verschlankt. (E.ON Cleaner and better energy)

Der letzte Beleg von E.ON suggeriert durch die Verbindung mit dem Verb *sehen* sowie dem Adjektiv *klar*\* eine eindeutige Antizipation von WACHSTUM.

Auf syntagmatischer Ebene finden sich häufig adjektivische Eigenschaftszuschreibungen der Form *x Wachstum*, durch welche das Konzept ›Wachstumsart‹ angereichert wird. Erneut geht es dabei um die Konzeptattribute ‚mikroökonomisch‘<sup>332</sup> sowie ‚makroökonomisch‘. Hierdurch zeigt sich auch der fachsprachliche Einfluss beim Sachverhalt WACHSTUM an. Am meisten wird die Perspektivierung jedoch aus der Perspektive eines möglichen PROFITS für das Unter-

---

<sup>328</sup> Vgl. dazu: „Das Wachstum unserer operativen Unternehmensbereiche soll das jeweilige jährliche Marktwachstum um ein bis zwei Prozentpunkte übertreffen. Um dieses ehrgeizige Ziel zu erreichen, haben wir im Jahr 2010 mit einem umfassenden Wachstumsprogramm für unser Logistikgeschäft begonnen, das folgende vier Felder umfasst.“ (Deutsche Post GB 2010).

<sup>329</sup> Vgl. dazu: „Auch um künftig erfolgreich zu sein, müssen wir nicht nur die Kostenseite im Griff behalten, sondern auch Wachstumsinitiativen und Innovationen erfolgreich entwickeln.“ (Telekom GB 2010).

<sup>330</sup> Vgl. dazu: „Angesichts positiver Wachstumsprognosen, besonders für Deutschland und den asiatischen Raum, halten wir es aktuell nicht für wahrscheinlich, dass sich die Konjunktur kurzfristig erneut abkühlen und sich dieses wesentlich auf unser geplantes Ergebnis auswirken wird.“ (Deutsche Post GB 2010).

<sup>331</sup> Vgl. dazu: „Weitere Wachstumsperspektiven ergeben sich aus der engeren Zusammenarbeit der DHL-Unternehmensbereiche.“ (Deutsche Post GB 2010).

<sup>332</sup> Vgl. dazu: „Wir wollen an dem erwarteten weiteren Wachstum, insbesondere in unserem Kerngeschäft der Passagierbeförderung, partizipieren. Dieses kann sowohl über organisches Wachstum als auch – sofern sich strategisch und wirtschaftlich wertschaffende Opportunities ergeben [...]“ (Lufthansa GB 2010).

nehmen vorgenommen, d.h. das Attribut ‚ökonomisch‘ wird durch die Häufung von *profitables + Wachstum*<sup>333</sup> dominant gesetzt:

ThyssenKrupp setzt mit anspruchsvollen Konzepten auf profitables Wachstum in internationalen Zukunftsmärkten. (ThyssenKrupp GB 2010)

Die ‚temporale‘ Spezifizierung von WACHSTUM scheint ebenfalls wichtig für den Diskurs, was sich durch die häufigen Verwendungen von *nachhaltig\** oder *langfristig\** + *Wachstum* offenbart:

Wir sind überzeugt, dass nachhaltiges Wirtschaften zum Erfolg unserer strategischen Prioritäten und damit zum langfristigen Wachstum unseres Unternehmens beiträgt. (Henkel GB 2010)

Bei einer Vielzahl der dabei ausgewerteten Syntagmen fällt auf, dass das adjektivische Attribut um ein zweites Adjektiv erweitert wird, das sich kohäsiv durch *und* anschließt und die Attribute ‚temporal‘ (*nachhaltiges, dauerhaftes*) sowie ‚profitorientiert‘ (*profitables, ertragsorientiertes*) in Bezug auf WACHSTUM verbindet.<sup>334</sup>

Den Rahmen für unser profitables, nachhaltiges und dauerhaftes Wachstum geben unser Wertesystem und unsere Strategie vor. Sie bilden die Leitlinien für das Handeln aller Mitarbeiter. (Siemens Unsere Werte)

Die Strategie der Linde Group ist auf ertragsorientiertes und nachhaltiges Wachstum ausgerichtet. (Linde GB 2010)

Während in diesen Belegen durch die Verknüpfung mit *und* eine Koordinierung vorgenommen wird, finden sich daneben Aussagen, bei denen *nachhaltig\** oder *langfristig\** als Adverb genutzt und *profitable\** untergeordnet werden (besonders bei BMW, LINDE und METRO):

Die unternehmerische Unabhängigkeit der BMW Group gewährleisten wir durch nachhaltiges profitables Wachstum. (BMW GB 2010)

Eine solche Verbindung (*nachhaltiges profitables Wachstum*) offenbart dabei die tiefensemantische Annahme ›Wachstum als natürliche ökonomische Folge in temporaler Hinsicht‹. Ein weiteres dominantes Attribut von ›Wachstumsart‹ ist ‚physikalisch‘ (*stark\*, dynamisch\*, deutlich\**):

Dynamisches Wachstum. Hauptpflege ist unsere Leidenschaft. 2009 hat Beiersdorf einen Umsatz von 5,75 Mrd. € erzielt. (BDF Unser Profil)<sup>335</sup>

Die Adjektive *international\**, *weltweit\** und *global\** evozieren das Attribut ‚global‘, was sich an das bereits angeführte Konzept ›Wachstumsorte‹ koppelt:

---

<sup>333</sup> In Variation findet sich auch *wertsteigernd\* + Wachstum*: „Wege zu wertsteigerndem Wachstum“ (BASF GB 2010/Strategie und Werte).

<sup>334</sup> Varianten, die mit diesen beiden Polen „spielen“, finden sich hierbei: „Unsere Strategie ist auf nachhaltiges wirtschaftliches und Werte schaffendes Wachstum ausgerichtet – im Interesse aller unserer Stakeholder.“ (K+S GB 2010); „Damit setzen wir bei den Vertragskunden auch weiterhin auf nachhaltiges und vor allem werthaltiges Wachstum.“ (Telekom GB 2010).

<sup>335</sup> Vgl. dazu: „Ein außerordentlich starkes Wachstum erzielten wir in Nordamerika bei unserer Gesellschaft APP Pharmaceuticals dank neuer Produkte, zuverlässiger Lieferfähigkeit und Qualität.“ (Fresenius GB 2010); „Unsere starke Position auf den Langstrecken zahlt sich aus: 2010 war von deutlichem Wachstum geprägt, vor allem dank der Preiserholung und der gestiegenen Nachfrage nach First- und Business-Class-Tickets.“ (Luft-hansa GB 2010).



Wir bauen auf weltweites Wachstum. Weil wir helfen wollen, eine bessere Welt zu bauen. (Heidelberg-Cement Corporate Mission)

Daneben fällt bei der Auswertung der Syntagmenebene die frequent genutzte Konstruktion *X für Wachstum* (v.a. bei FRESENIUS) ins Auge, die oft gemeinsam mit der diskurstypischen *Grund\*/-Basis-/Fundament-Metapher* auftritt:

Unsere Mitarbeiter sind das Fundament für starkes Wachstum und den Erfolg des ThyssenKrupp Konzerns. (ThyssenKrupp GB 2010)

Bei HEIDELBERGCEMENT wird *Fundament* durch das Metonym *Zement* ersetzt, was dadurch zu einer Doppeldeutigkeit führt, da das Unternehmen ZEMENT herstellt und damit die Bedeutungen ‚Grundlage‘ und ‚Baustoff‘ sprachlich angelegt werden (→ Abb. 103). Weitere Metaphern finden sich, angelehnt an die Diskurstypik, durch *Schlüssel*, *Weg* und *Quelle*:

Ein Schlüssel für nachhaltiges Wachstum bei Siemens sind unsere Investitionen in Forschung und Entwicklung. (Siemens GB 2010)

Diese Konstruktion bei SIEMENS weist darauf hin, dass WACHSTUM noch nicht erreicht ist, sondern erst zu diesem ‚aufgeschlossen‘ werden muss (durch den *Schlüssel* FORSCHUNGSINVESTITIONEN). So legitimiert diese Aussage, dass weitere INVESTITIONEN in (eventuell riskante oder ethisch bedenkliche) FORSCHUNGEN erfolgen müssen, um WACHSTUM bei SIEMENS zu gewährleisten. Schließlich wird mit den Syntagmen *\*voraussetzung/\*faktor/Treiber/Motor für (x) Wachstum* wiederum das bereits angeführte Konzept ›Wachstums-katalysation‹ evoziert.

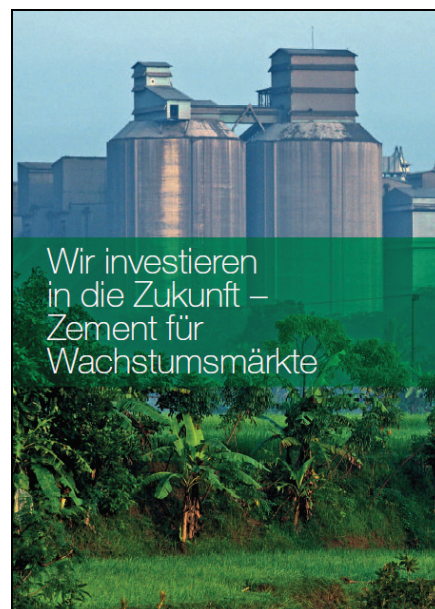

Abbildung 103 - HeidelbergCement GB 2010

FRESENIUS verwendet dagegen eine im Diskurs unkonventionelle Metapher (*Triebfeder*) und hebt sich dadurch sprachlich hervor:

Auch im Bereich der onkologischen Generika sind Produkteinführungen eine wesentliche Triebfeder für künftiges Wachstum. (Fresenius GB 2010)

Es lässt sich für die Syntagmenebene festhalten, dass durch das regelhafte Auftreten sowie die (metaphorischen) Füllungen der Konstruktion *X für Wachstum* der Sachverhalt WACHSTUM als ZIEL konstruiert wird.

Auf der Satzebene fallen diverse Belege der Form *Wachstum ist x* auf, durch welche Prädikationen über WACHSTUM als Sachverhaltsfestsetzungsversuche stattfinden:

Doch Wachstum allein um des Wachstums willen ist für uns kein Ziel. Als Rohstoffunternehmen denken und handeln wir langfristig. (K+S GB 2010)

Wachstum ist kein reines Zahlenspiel. Sondern Grundlage für neue Investitionen. Wir wollen auch zukünftig unser unternehmerisches Potenzial entfalten und weiterentwickeln, um die vielen neuen Chancen, die sich am Markt bieten, optimal zu nutzen. (Merck Einzigartig – Der Merck Weg)

Die Bedeutung von WACHSTUM wird in diesen Belegen nicht nur an das Attribut ‚ökonomisch‘ gebunden, sondern schließt auch weitere Aspekte (z.B. ‚temporal‘) mit ein. Das Merkmal ‚ökonomisch‘ wird zudem durch Heckenausdrücke (*allein um, kein, kein reines*) eingeschränkt.<sup>336</sup> Dass es außerdem um ein ‚ethisch verträgliches‘ WACHSTUM geht, wird durch Modalisierungen beansprucht:

Zugleich muss profitables Wachstum langfristig in verantwortliches Handeln gegenüber der Gesellschaft und der Umwelt eingebettet werden. (Metro GB 2010)<sup>337</sup>

Das Konzeptattribut ‚ethisch verträglich‘ wird besonders von K+S auf der Satzebene weiter bearbeitet, indem durch die modale Konstruktion *Wachstum braucht X* der Sachverhalt WACHSTUM agentisiert wird und ‚Bedürfnisse‘ zugeschrieben bekommt. Diese ‚Bedürfnisse‘ werden zu Beginn auf KONKRETE MATERIALIEN (*Rohstoffe*) bezogen, die K+S als Rohstoffunternehmen in der Tat für seine PRODUKTION *braucht*:

Wachstum braucht Rohstoffe. Seit mehr als 100 Jahren fördern und veredeln wir Rohstoffe, die in nahezu allen Bereichen des täglichen Lebens Grundlage für nachhaltiges Wachstum sind. (K+S GB 2010)

Mittels Bildern werden diese Aussagen (*Wachstum braucht Rohstoffe, Wachstum braucht Mineralien, Wachstum braucht Ressourcen*) begleitet:

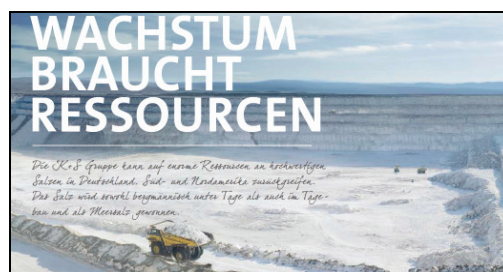

Abbildung 104 - K+S GB 2010

<sup>336</sup> MERCK versucht, die Verbindung der Attribute ‚ökonomisch‘ und ‚temporal‘ durch den Ausdruck Qualitätswachstum festzusetzen: „Unser Ziel ist dabei der nachhaltige wirtschaftliche Erfolg. Wir streben ein Wachstum mit guter Qualität an, bei dem der Umsatz schneller zulegt als die Kosten. Dieses „Qualitätswachstum“ schafft eine sichere Vertrauensbasis [...].“ (Merck Einzigartig – Der Merck Weg).

<sup>337</sup> Vgl. dazu auch: „Profitables Wachstum braucht Werte.“ (Metro GB 2010).

Im Verlauf der textuellen Präsentation ändern sich die Bezugnahmen jedoch – von KONKRETE MATERIALIEN zu ABSTRAKTE WERTE, die nur noch metaphorisch gültig sind, und durch substantivische Abstrakta ausgedrückt werden, u.a. durch *Wachstum braucht Erfahrung*, *Wachstum braucht Verantwortung* oder *Wachstum braucht Verlässlichkeit*:

Wachstum braucht Verlässlichkeit. Wir sorgen mit unseren Auftausalzen für freie und sichere Straßen. Als größter Salzproduzent der Welt sind wir dank ausgefeilter Logistik ein verlässlicher Lieferpartner. (K+S GB 2010)

Dass K+S den Wachstumsbegriff weiterhin für seine Identitätskonstruktion nutzt, offenbart die rekurrente Aufnahme dessen, sogar als Subtitel im *Geschäftsbericht 2010 (Nachhaltig wachsen)*. *Nachhaltig wachsen* enthält dabei das Verb *wachsen*, durch welches WACHSTUM als ›Wachstumsvorgang‹ erscheint. Das Verb *wachsen* tritt insgesamt jedoch seltener (370x) als das Substantiv *\*wachstum\** im Korpus auf, wodurch wiederum die starke Fokussierung auf WACHSTUM als ZIEL deutlich wird, da das Substantiv *\*wachstum\** die Ergebnis- und nicht die Prozessperspektive (*wachsen*) betont. Jedoch ist die Tempus- und Modusvielfalt bei *wachsen* in den Konkordanzen auffallend: Mit Präteritum und Perfekt wird sich auf eine ›vergangene Wachstumsphase‹ bezogen, wobei das Perfekt diesen Vorgang als noch nicht abgeschlossen markiert (vgl. Köller 2004, 438). WACHSTUM wird somit von vielen Unternehmen an die gesamte UNTERNEHMENSGESCHICHTE bzw. TRADITION geknüpft (→ dieser Anhang, 1.15.1):

Durch Akquisitionen im Düngemittel- und im Salzgeschäft sind wir im vergangenen Jahrzehnt – vor allem international – stark gewachsen. (K+S GB 2010)

Das Präsens evoziert dagegen die ›aktuelle Wachstumssituation‹:

Als internationales Markenartikelunternehmen wachsen wir weltweit. (BDF Unser Profil)

Durch das Futur wird mit hoher epistemischer Sicherheit ausgedrückt, dass ein ›Wachstumstrend‹ besteht:

So sind wir für den globalen Wettbewerb optimal aufgestellt und werden auch in Zukunft weltweit wachsen. (BDF Imagebroschüre)

Das Modalverb *wollen* sowie die imperativischen bzw. deontischen Infinitive (*nachhaltig wachsen*) drücken ebenfalls eine zukünftige Absicht (zum ›Wachstumstrend‹) aus:

Mit Innovationen wollen wir in wettbewerbsintensiven Märkten stärker als unsere Wettbewerber wachsen und uns neue Märkte erschließen. (Henkel GB 2010)<sup>338</sup>

Wachsen im dynamischen Markt. (Munich Re GB 2010)

Es zeigt sich also, dass innerhalb der drei Zeitstufen das Konzept ›Wachstumstrend‹ dominiert. Diese Konzeptualisierung wird noch deutlicher, wenn man die Konstruktion *wachsen* +

---

<sup>338</sup> Vgl. dazu auch: „Weil wir langfristig wachsen und unsere Ertragskraft steigern wollen, überprüfen wir regelmäßig, ob wir das Netz unserer Dialysekliniken durch Zukäufe erweitern können.“ (FMC GB 2010).

Adverb verfolgt, da Adverbien wie *weiter* den WACHSTUMSTREND als ‚bereits begonnen‘ kennzeichnen:

Wir gehören weltweit zu den Besten und wollen weiter wachsen. Voraussetzung dafür sind ein besonders qualifiziertes Management, engagierte, gut ausgebildete Mitarbeiter und zufriedene Kunden. (Heidelberg-Cement Corporate Mission)

Auch Komparative, die einen Zustand im Positiv als ‚bereits überkommen‘ markieren (*stärker, schneller*) sind dazu dienlich:

An erster Stelle steht die Aussicht auf weiteres Wachstum. Durch die fortschreitende Globalisierung wird die Logistikindustrie auch in Zukunft deutlich stärker wachsen als die Volkswirtschaft en insgesamt. (Deutsche Post GB 2010)

Beiersdorf will international schneller wachsen als der Markt. Deshalb engagieren wir uns besonders in Regionen mit überdurchschnittlichem Potenzial. (BDF Imagebroschüre)

Weitere Konstruktionen, die das Konzept ›Wachstumstrend‹ anreichern, sind *deutlich wachsen, robust wachsen, überdurchschnittlich wachsen* sowie *langfristig wachsen*. WACHSTUM scheint somit nie beendet, sondern ein zirkuläres ZIEL, was bei METRO auf der Text-Bild-Ebene mittels eines Ikons (*/Wachstumskreislauf/*) dargeboten wird (→ Abb. 105). WACHSTUM reiht sich folglich – neben ERFOLG und INNOVATIONEN – durch die gezeigten sprachlichen Konstruktionen als ZIEL/ERFÜLLUNGSZUSTAND (›Wachstumstrend‹, ›Wachstumskatalysation‹) der Unternehmen ein, das sinnstiftend für diese wirkt. WACHSTUM wird dabei relativ homogen mit den Attributen ‚ökonomisch‘, ‚temporal‘ sowie ‚ethisch verträglich‘ aufgerufen.

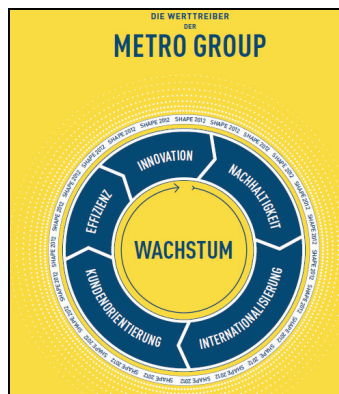

Abbildung 105 - Metro GB 2010

Im folgenden Kapitel werden weitere ökonomische Konstanten, welche UNTERNEHMENS-IDENTITÄT systemisch-strukturell begleiten, als ÖKONOMISCHE KENNZAHLEN/RATIONALITÄTSKRITERIEN dargestellt.

### 1.2.10 ÖKONOMISCHE KENNZAHLEN/RATIONALITÄTSKRITERIEN

Die explizite Bezugnahme auf ZAHLEN (JAHRESANGABEN, UMSÄTZE/GEWINNE, MITARBEITER-/KUNDENZAHLEN, STANDORTALLOKATIONEN oder PRODUKTMENGEN) wurde bereits unter der Strategie der Bezugnahme (→ 8.2.3.1) beschrieben. Diese Anlehnung an statistische An-

gaben spiegelt die enorme rational-mathematisierte Ausrichtung des Diskursbereichs WIRTSCHAFT wider und wird in den folgenden Kapiteln um diejenigen Sachverhalte erweitert, die das Rationalitätsprinzip bei der Konstruktion von UNTERNEHMENSIDENTITÄT stützen: EFFIZIENZ (→ dieser Anhang, 1.10.1) und PROFIT/GEWINN (→ dieser Anhang, 1.10.2).

### 1.2.10.1 EFFIZIENZ

Das Wirtschaftlichkeitsprinzip ist ein systemindifferentes Tatbestandsmerkmal, das für alle Unternehmen, unabhängig von der Wirtschafts- und Gesellschaftsordnung, konstitutiv ist (vgl. Diaz-Bone/Krell 2009, 11). Die Dax-30-Unternehmen im Korpus referieren darauf vor allem unter der Nutzung des Sachverhalts EFFIZIENZ, an dem sich profitorientierte Unternehmen vor allem wirtschaftlich ausrichten:

Herausragende Umsetzung und Effizienz sowie motivierte und leistungsstarke Mitarbeiter sind der Schlüssel für den künftigen Unternehmenserfolg. (Daimler GB 2010)

Wenn wir aber in wirtschaftlich schwierigen Zeiten weiter wachsen wollen, müssen wir Effizienz zum festen Bestandteil der Leistungskultur des Unternehmens machen. (E.ON Cleaner and better energy)

Praktisch bedeuten diese Aussagen, dass DAIMLER und E.ON von einem ‚geringeren Mitteleinsatz und niedrigeren Kosten zur Erzeugung des gleichen Nutzens‘ ausgehen, denn das Verhältnis von ERTRAG und AUFWAND (= PRODUKTIVITÄT/RENTABILITÄT im wirtschaftlichen Sinn) muss sich für profitorientierte Unternehmen rentieren, um ERFOLG (*künftigen Unternehmenserfolg*) und WACHSTUM (*weiter wachsen*) zu erzielen.<sup>339</sup> Will man den Sachverhalt EFFIZIENZ weiter spezifizieren, lassen sich durch die Suche nach *\*effizienz* (mit insgesamt 441 Hits in den Konkordanzen) Komposia auffinden, die das Konzept ›Effizienzart‹ transportieren. Dabei geht es insbesondere um ‚Kosteneffizienz‘, ‚Energieeffizienz‘ und ‚Ressourceneffizienz‘:

In den Aktienkursen spiegelt sich die wirtschaftliche Lage eines Unternehmens, einer Branche oder eines ganzen Landes. Geschwindigkeit, Transparenz und Kosteneffizienz sind die entscheidenden Vorteile von Xetra®. (Deutsche Börse Vom Parkett zum elektronischen Handelsplatz)

Um nachhaltige Transportkonzepte und eine zukunftssichere Energieversorgung zu ermöglichen, entwickelt die MAN Gruppe Lösungen für mehr Ressourceneffizienz und mehr Sicherheit. Dieses Ziel wird unterstützt durch eine – noch in Erarbeitung befindliche – gruppenweite Klimastrategie mit klaren Zielen, ein ressourceneffizientes Produkt- und Serviceportfolio sowie Ressourceneffizienz in Produktion und Verwaltung. (MAN GB 2010)

Das letzte Beispiel von MAN veranschaulicht die gleichzeitige Realisierung von ‚Ressourceneffizienz‘ durch das Adjektiv *ressourceneffizient\**; so wird auch ‚Kosteneffizienz‘ vielfach adjektivisch (*kosteneffizient\**<sup>340</sup>) realisiert (*\*effizient\** = 442 Hits). Weitere Anreicherungen

---

<sup>339</sup> Durch das Unternehmenshandeln ergeben sich „entweder Effektivitätsvorteile (überlegene Nutzenstiftung) oder Effizienzvorteile [...]“ (Schmid/Lyczek 2008, 29).

<sup>340</sup> Vgl. dazu: „Seit Jahren verbessern wir in den einzelnen Regionen kontinuierlich unsere Abläufe, um so kosteneffizient wie möglich hohe Qualität zu liefern. In Zukunft wollen wir dieses Potenzial noch besser nutzen.“ (FMC GB 2010).



von ›Effizienzart‹, die im Diskurs genannt werden, sind ‚CO2-Effizienz‘ und ‚Energieeffizienz‘, welche dagegen stärker den Wissensrahmen ›Umwelt‹ durch den Kotext mitaufrufen:

Zahlreiche Projekte für höhere Energieeffizienz in unseren Konzernunternehmen haben sowohl zusätzliche Kosten eingespart als auch die mit der Energienutzung verbundene Freisetzung von Treibhausgasen wie z.B. CO2 weiter verringert. (ThyssenKrupp GB 2010)

*Energieeffizienz* ist vor allem ein Schlüsselwort bei den Energieunternehmen, die sich in Bezug auf ›Umwelt‹ positionieren (müssen). Daher werden zahlreiche Bedeutungsfixierungsversuche, insbesondere von RWE, vorgenommen:

Energieeffizienz. Der sparsame Umgang mit Energie ist nicht nur gut für das Klima, sondern schon auch Ressourcen – und damit den Geldbeutel. Wir unterstützen unsere Kunden dabei auf vielfältige Weise, etwa durch Einsatz intelligenter Stromzähler (Smart Meter), automatische Verbrauchssteuerung daheim (Smart Home) und die Förderung der Elektromobilität. Auf unserem Internetportal [www.energiwelt.de](http://www.energiwelt.de) geben wir Tipps zum Energiesparen und informieren über Förderprogramme und Herstellerangebote. Beim effizienten Einsatz knapper Ressourcen sind aber zuallererst wir selbst als Unternehmen gefordert. (RWE GB 2010)<sup>341</sup>

RWE führt in diesem Beleg (neben ‚Energieeffizienz‘) durch das Syntagma *knappe[n] Ressourcen* auch das Attribut ‚Ressourceneffizienz‘ auf, das an das Unternehmen RWE *selbst*, geknüpft wird, welches RESSOURCEN sparsam einsetzen will. Durch die Verbindung *selbst als Unternehmen* findet sich dabei indirekt der Rückbezug zu UNTERNEHMENSIDENTITÄT gegeben.

Syntagmatisch wird *Effizienz* meist mit *höher/höherer/höchste* oder *mehr/steigend/gestiegene* kombiniert, d.h. es geht um die ›Effizienzart‹ ‚hoch‘ bzw. ‚Effizienzerhöhung‘, wodurch aber auch präsupponiert wird, dass Unternehmen derzeit nicht (genügend) effizient handeln:

Höhere Effizienz und mehr Nachhaltigkeit im gesamten Geschäftsnetzwerk stehen auch künftig für Unternehmen im Mittelpunkt. (SAP GB 2010)

Die vertikale Richtungsangabe ›nach oben‹ (durch *steigende*, *hohe*, *höher\**) wird auch im weiteren Kotext von *Effizienz* aufgenommen, indem das Syntagma *Steigerung der Effizienz* oder das Kompositum *Effizienzsteigerung/en* genutzt werden:

Steigerung der Effizienz der Stromerzeugung, Flexibilisierung des Kraftwerksparks. (RWE Unsere Verantwortung 2010)

EFFIZIENZSTEIGERUNG wird zudem auf der Textebene referiert, wenn HENKEL etwa im *Geschäftsbericht 2010* vom *Effizienzsteigerungsprogramm „Global Excellence“* spricht. Ein ähnliches Beispiel liefert METRO:

Mit unserem Effizienz- und Wertsteigerungsprogramm Shape 2012 haben wir uns zum Ziel gesetzt, sämtliche Strukturen und Prozesse in der Unternehmensgruppe effizienter zu gestalten und die Komplexität des Konzerns deutlich zu reduzieren. (Metro GB 2010)

---

<sup>341</sup> Vgl. dazu auch: „Energie effizienter nutzen heißt, Kosten senken und die Umwelt schonen. Wir helfen unseren Kunden dabei – und stärken damit unsere Position im Vertrieb.“ (RWE GB 2010).



Auch auf der Satzebene manifestieren sich im Kontext von *Effizienz* verbale Operatoren, die eine vertikale Richtungsangabe (›nach oben‹) konzeptualisieren. Es handelt sich dabei um Kookkurrenzen mit *steigern* und *steigen* (›Effizienzhandlung‹ ‚Effizienzsteigerung‘):

Wir steigern unsere Effizienz und optimieren unser operatives Geschäft. Wir optimieren unseren Kapitaleinsatz. (E.ON Cleaner and better energy)

Alternativ taucht – häufig in Verbindung mit dem *zu*-Infinitiv oder dem imperativischen bzw. deontischen Infinitiv – die Konstruktion *Effizienz* + *verbessern* auf (‚Effizienzverbesserung‘):

Um die Effizienz zu verbessern und die Materialversorgung sicherzustellen, optimieren wir fortlaufend die Wertschöpfungskette bei gleichzeitiger Erhaltung eines exzellenten Qualitätsniveaus. (Henkel GB 2010)

Effizienz verbessern. (Deutsche Post GB 2010)

*Effizienz steigern* und *Effizienz verbessern* zeigen sich folglich als diskurstypische Kollokationen im Korpus, die einen (notwendigen) ›Anstieg‹ der Bemühungen um EFFIZIENZ dominant setzen.

Daneben wird das Adjektiv *effizient*\* an OBJEKTE gebunden, die dadurch dem Effizienzprinzip unterliegen (›Effizienzträger‹): Es handelt sich um ‚Prozesse/Abläufe‘<sup>342</sup>, ‚Ressourcenumgang‘<sup>343</sup>, ‚Wertschöpfungskette‘ sowie ‚Produkte‘<sup>344</sup>. HENKEL formuliert dabei stark generalisierend:

Effizientes und effektives Wirtschaften ist der Eckpfeiler für unseren ökonomischen Erfolg. Den brauchen wir als Wirtschaftsunternehmen, um unsere langfristige Wettbewerbsfähigkeit zu halten und immer wieder zu stärken. (Henkel GB 2010)

DAIMLER bindet EFFIZIENZ an PRODUKTE zurück, indem das Substantiv *Effizienz* metonymisch durch *Mercedes Benz* personalisiert und gleichzeitig ästhetisch aufgewertet wird:

Mercedes-Benz Modelle, wie etwa der neue CLS, bringen die neue Effizienz in Vollendung auf die Straße. (Daimler GB 2010)

Desgleichen zeigt sich in der Analyse, dass ‚Effizienzsteigerung‘ zahlreich an das Attribut ‚Kostensenkung‘ gekoppelt wird. Sprachlich wird dies beispielsweise durch eine antithetische Darstellung erreicht, was die folgende Orientierungsmetapher (*rauf/runter*) verknüpft:

Effizienz rauf, Kosten runter: Die Nutzung von Synergien im Konzernverbund eröffnet viele Möglichkeiten. Dieses betrifft das dadurch immer attraktiver werdende Streckennetz und die Zusammenarbeit mit den Geschäftsfeldern Technik, IT Services und Catering. (Lufthansa GB 2010)

LUFTHANSA präsupponiert in dieser Aussage: ›bei steigender Effizienz sinken die Kosten‹. Weitere Belege suggerieren, dass die absteigende Bewegung der ‚Kostensenkung‘ (*Kosten senken/minimieren/(ein)sparen*) antagonistisch mit der ‚Effizienzsteigerung‘ (*Effizienz stei-*

---

<sup>342</sup> Vgl. dazu: „Mit Hilfe des neuen Produktionssystems können wir Pakete effizienter sortieren und transportieren und damit Kosten einsparen.“ (Deutsche Post GB 2010); „Eine besondere Verteilungslogik sorgt dafür, dass Produktionsaufträge bei gleichen Produkten und Herstellverfahren effizient unter den jeweiligen Produktionswerken aufgeteilt werden.“ (FMC GB 2010).

<sup>343</sup> Vgl. dazu: „Von der Forschung und Entwicklung bis zur Produktion setzen wir auf effiziente Ressourcennutzung, Emissions- und Lärminderung.“ (Daimler Das Unternehmen 2011).

<sup>344</sup> Vgl. dazu: „Das effiziente E-Klasse Cabrio folgt keiner Strömung, sondern gibt sie vor.“ (Daimler GB 2010).

gern/steigt/Effizienzsteigerung/en) einhergeht, was durch parallele syntaktische Strukturen unterstrichen wird:

Innerhalb des gesamten Wertschöpfungsprozesses der Produktion und der Logistik haben wir die Komplexität abgebaut. Das umfasst die Ebene der Produktherstellung sowie die Auswahl unserer Lieferanten. Auf diese Weise konnten wir die Effizienz erheblich steigern und Kosten senken. (Henkel GB 2010)

Durch die temporale Markierung von Gleichzeitigkeit (*gleichzeitig, während*) wird ebenfalls erreicht, dass der Rezipient die Sachverhalte EFFIZIENZSTEIGERUNG und KOSTENERSPARNIS in kausallogischer Abhängigkeit begreift:

Den Bestrebungen im Gesundheitswesen, Kosten zu sparen, werden wir mit medizinischer Innovation und gleichzeitig mit Effizienzsteigerungen begegnen. (Fresenius Auf einen Blick 2011)

Da wir diese Dienstleistungen für viele Einheiten von Henkel erbringen, können wir einen hohen Grad an Standardisierung erreichen. Dabei helfen uns auch leistungsfähige IT-Systeme. Damit steigt die Effizienz und Geschwindigkeit, während die Kosten für den einzelnen Prozess sinken. (Henkel GB 2010)

Im weiteren Verlauf der Belegsichtung taucht als partielles Synonym zu *Effizienz* der Ausdruck *Wirtschaftlichkeit* auf, obwohl die Doppelung der Ausdrücke im folgenden Beleg von MAN fast tautologisch erscheint:

Einsparpotenzial. Wirtschaftlichkeit und Effizienz im Blick. Im harten Wettbewerb der Transport- und Logistikbranche gilt: Die Gesamtkosten vom Kauf bis zum Verkauf des Fahrzeugs zählen. Die Reduzierung des Kraftstoffverbrauchs ist daher ein wesentlicher Stellhebel für effizientes Business. (MAN GB 2010)

Der Rezipient erhält von MAN keine klare Differenzierung der Sachverhalte EFFIZIENZ und WIRTSCHAFTLICHKEIT. Laut Diaz-Bone/Krell (2009, 11) steht bei WIRTSCHAFTLICHKEIT jedoch stärker der Aspekt der ‚Optimierung des Verhältnisses‘ von *Input* und *Output* bzw. zwischen Aufwand und Ertrag im Vordergrund. Im Gegensatz zu *Effizienz* wird *Wirtschaftlichkeit* jedoch relativ selten fachsprachlich-ökonomisch gebraucht, sondern vielmehr in der Funktion des Hochwertwortes *Wirtschaftlichkeit* (in Akkumulation mit anderen Hochwertwörtern) verwendet:

Nachhaltigkeit im Kali- und Steinsalzbergbau bedeutet, die Ziele Wirtschaftlichkeit, Umweltverträglichkeit und soziale Verantwortung aufeinander abzustimmen. (K+S GB 2010)

Daher werden bei *Wirtschaftlichkeit* auch explizite Bewertungen mittels evaluativen bzw. affektiven Adjektiven vorgenommen:

Alle drei Marken verbinden höchste Sicherheit, größter Komfort und ausgezeichnete Wirtschaftlichkeit. (Daimler Das Unternehmen 2011)

Fahrzeuge von Daimler Buses verbinden Qualität mit sehr guter Wirtschaftlichkeit und höchsten Sicherheitsstandards. (Daimler Unternehmensinformationen 2010)

Auch in metaphorischen Aussagen, die eine horizontale Bewegung ›nach vorn‹ (*in Fahrt kommen/vorantreiben*) anzeigen, wird *Wirtschaftlichkeit* verwendet:

Unser Ziel ist es, gerade in wirtschaftlich schwierigen Zeiten die Vereinbarkeit von Wirtschaftlichkeit, Versorgungssicherheit und Klimaschutz in einer unternehmerischen Strategie voranzutreiben. (E.ON Cleaner and better energy)

Letztlich fällt bei beiden konstituierten Sachverhalten (WIRTSCHAFTLICHKEIT und EFFIZIENZ) die Häufung von *flexibel*/\**flexibilität* im Kontext von *wirtschaftlich*\* und *effizienz*\* auf:

Indem wir Produktivität, Effizienz und Flexibilität kontinuierlich optimieren, gelingt es uns, die ökonomische und ökologische Wettbewerbsfähigkeit von Industrie- und Infrastrukturfunktionen zu steigern. (Siemens GB 2010)

LUFTHANSA klassifiziert *Flexibilität* dabei als unternehmensinhärente VERHALTENSEIGENSCHAFT durch die Verbindung mit *Stärken*:

Balance halten // Flexibilität zählt zu unseren größten Stärken. In der Krise notwendig gewordene Veränderungen haben wir aktiv gestaltet – etwa durch Restrukturierungen im Kontinentalverkehr, wie zum Beispiel mit dem Projekt EUDIRrection, durch das die Stückkosten im dezentralen Verkehr reduziert werden. (Lufthansa GB 2010)

Das Kapitel zu EFFIZIENZ veranschaulichte damit, wie Unternehmen EFFIZIENZ als Maß für Kosten-Nutzen-Verhältnisse sowie für den rationalen Umgang mit (knappen) RESSOURCEN konstituieren und dabei vor allem das Attribut ‚Effizienzsteigerung‘ dominant setzen. Auffallend ist jedoch die insgesamt geringfügigere Versprachlichung des Sachverhalts im Vergleich zu den bisher präsentierten Sachverhalten. Es stellt sich daher bereits hier die Frage, inwieweit ÖKONOMISCHE KENNZAHLEN bzw. RATIONALITÄTSKRITERIEN als Konstitutionsmittel für UNTERNEHMENSIDENTITÄT relevant sind, oder ob diese nur unter der Funktion der Bezugnahme (→ 8) der Durchsetzung von UNTERNEHMENSIDENTITÄT dienen.

### 1.2.10.2 PROFIT/GEWINN

PROFIT bzw. GEWINN wird als wichtigstes Unternehmensziel, welches sich aus dem ökonomischen Handlungsprinzip profitorientierter Unternehmen folglich ergibt, beschrieben (vgl. Schmid/Lyczek 2008, 29).<sup>345</sup> Da es sich im Korpus um solche Unternehmen handelt, ist davon auszugehen, dass sie auch dieses Formalziel aus ökonomischer Sicht in ihre UNTERNEHMENSIDENTITÄT integrieren. Im Vergleich zu den anderen behandelten Sachverhalten, die lexikalisch über *Keywords* und Hochfrequenzwörter relativ homogen versprachlicht werden, sind die Einzellexeme, die auf PROFIT/GEWINN verweisen, in ihrer Häufigkeit jedoch weniger auffällig. Es zeigt sich dagegen besonders im *Geschäftsbericht* eine Gruppe von Wörtern (ein Wortfeld), das den Sachverhalt PROFIT/GEWINN scheinbar semantisch ausdifferenziert, da die einzelnen Lexeme enge semantische Verbindungen untereinander aufweisen: Es handelt sich um *Profitabilität*, *Gewinn*<sup>346</sup>, *Umsatz*<sup>347</sup>, *Mehrwert*, *Wertle*, *Rentabilität* sowie die Partizipien *profit-*, *gewinn-*, *wert-* und *ertragsorientiert*. Diese Lexeme tauchen im Korpus oft uneindeu-

---

<sup>345</sup> Neben dieses Ziel treten weitere Sachziele (Markt-, Produktziele, Finanzziele, Führungsziele, soziale und ökologische Ziele). Die *Rentabilität* (Verhältnis von Ertrag und Aufwand eingesetzter Produktionsfaktoren; als Differenz der *Gewinn*) ist dadurch Hauptbedingung des unternehmerischen Handelns. Das Unternehmensziel muss jedoch nicht mit dem Unternehmenszweck gleichgesetzt werden (vgl. Schmid/Lyczek 2008, 30).

<sup>346</sup> Vgl. dazu auch die Komposita *Gewinnstreben*-, *-orientierung* sowie *gewinnbringend*/\**-orientiert*\* im Korpus.

<sup>347</sup> *Umsatz* ist *Keyword* und Hochfrequenzwort auf den vorderen Rängen (*Keyword*-Rang 24; Frequenz 1.072x).

tig voneinander differenziert auf und sollen im Kapitelverlauf in ihrem Gebrauch untersucht werden.

Der Ausdruck *Profitabilität* wird beispielsweise prominent bei DEUTSCHE POST eingesetzt:

Deutsche Post DHL möchte ein attraktives Investment für Investoren sein und dafür auch bei der Profitabilität die führende Position in der Branche erreichen. (Deutsche Post GB 2010)

Aus diesem Beispiel geht jedoch nicht klar hervor, wie DEUTSCHE POST den Sachverhalt PROFITABILITÄT auslegt.<sup>348</sup> In einem weiteren Beleg wird *Profitabilität* als Teilüberschrift genutzt und scheinbar genauer in seiner Bedeutung erläutert:

Profitabilität. Wir betreiben weiterhin ein striktes Kostenmanagement. Dieses ist entscheidend, um wettbewerbsfähige Preise anbieten und weiter wachsen zu können. In den vergangenen Jahren haben wir einschneidende Maßnahmen zum Umbau des Bereichs umgesetzt. Im Berichtsjahr konnten wir die Früchte ernten. Vor dem Hintergrund unserer finanziellen Stärke konzentrieren wir uns zunehmend wieder auf Investitionen in unsere Mitarbeiter und unsere Marke. Nur so werden wir weiter wachsen können. Vorrang hat stets, die Produktivität zu steigern und indirekte Kosten strikt zu kontrollieren. Als Expressdienstleister arbeiten wir innerhalb eines globalen Netzwerks, das mehr als 220 Länder und Territorien umfasst. Jedes Land, jeder Standort hat seinen Beitrag zu leisten, um die Ertragskraft der globalen Organisation nachhaltig zu steigern. (Deutsche Post GB 2010)

Aus diesen Ausführungen ergibt sich jedoch nur ein weiteres lexikalisches Netz aus Wörtern (*Kosten(-management)*, *Preise*, *Investitionen*, *Ertragskraft* etc.), aus denen eine Vorstellung von ›Profitabilität‹ „zusammengeflickt“ wird. Ähnliches findet sich bei METRO, wo *Profitabilität* als partielles Synonym zur Überschrift [*w*]irtschaftliche Stärke aufgenommen wird:

Wirtschaftliche Stärke: Wir wollen unsere Stellung als eines der weltweit führenden internationalen Handelsunternehmen ausbauen und unsere Profitabilität weiter steigern. Mit diesem Ziel optimieren wir fortlaufend unsere Vertriebskonzepte, unsere Kostenstrukturen sowie unser auf wachstumsrelevante Geschäftsfelder fokussiertes Portfolio und setzen die internationale Expansion konsequent fort. (Metro Corporate Principles)

Aus diesem Beleg geht eine klarere Auffassung von ›Profitabilität‹ hervor, indem PROFITABILITÄT als Ziel unter Optimierung der KOSTENSTRUKTUREN gefasst wird. Das Syntagma *unsere Profitabilität* bindet PROFITABILITÄT zudem possessiv (‚besitzanzeigend‘) an METRO zurück. Daneben offenbaren sich auf der Syntagmenebene wenige adjektivische Attributionen von *Profitabilität*.<sup>349</sup> Vielmehr ergibt die Sichtung des Kontextes sowie der genitivischen Konstruktionen des Lexems (*X der Profitabilität*) die Vermutung, dass es – wie bei EFFIZIENZ – vor allem um eine ‚Steigerung‘ (‚Profitabilitätssteigerung‘ als ›Profitabilitätshandlung‹) geht:

Diese [Einsparungen, S.B.] verhalfen uns nicht nur dazu, die Wirtschaftskrise gut zu überstehen und ein starker Spieler am Halbleitermarkt zu bleiben, sondern auch zur Steigerung unserer Profitabilität. (Infineon GB 2010).

Das Muster *Profitabilität + steigern/erhöhen* wird auch auf der Satzebene versprachlicht und teilweise aus der Retrospektive perspektiviert:

---

<sup>348</sup> Vgl. *Profit* als „Vorteil, [materieller] Gewinn, den man [mit möglichst wenig Mühe und Kosten] aus einer Sache oder Tätigkeit zieht“ (Duden 2001, 1244) sowie fachsprachlich „Kapitalertrag“ (Duden 2001, 1244).

<sup>349</sup> Vgl. dazu: „Zur Steuerung unserer langfristigen Profitabilität setzen wir ein einheitlich definiertes System zur Messung unseres unternehmerischen Erfolgs ein.“ (HeidelbergCement Corporate Mission).

Wir haben Bestwerte bei Umsatz und Ertrag erzielt und unsere Profitabilität steigern können. (Fresenius GB 2010)

Während der Wirtschaftskrise der Jahre 2008 und 2009 hat sich der Unternehmensbereich SUPPLY CHAIN vor allem dank des erfolgreichen, fünf Verbesserungsbereiche umfassenden Geschäftsprogramms „5 to Thrive“ behauptet. In diesem Programm fokussierten wir uns darauf, die Gesamtrendite und Profitabilität zu erhöhen. (Deutsche Post GB 2010)

Solche Muster aus der Retrospektive beziehen sich meist auf das (letzte) GESCHÄFTSJAHR und tauchen daher häufig im *Geschäftsbericht* auf.

Der Ausdruck *Gewinn\** ruft, im Gegensatz zu *Profitabilität*, das Konzept ›Gewinn‹ auf, wobei das Attribut ‚materiell‘ durch die folgenden Verbildlichungen (*bauen auf Gewinne*) dominant gesetzt wird:

Die Heidelberger Marktstrategie. Wir bauen auf Gewinne. Weil unser Wachstum ein solides Fundament braucht. (HeidelbergCement Corporate Mission)

HEIDELBERGCEMENT betont in diesem Beleg zusätzlich – entgegen des eher fachsprachlich genutzten Gewinnkonzeptes (›Gewinn‹ als ‚Marge auf dem Warenumsatz nach Abzug aller für Produktion und Verkauf angefallenen Kosten‘, vgl. Chiapello 2009, 133) ein generalisierendes Gewinnkonzept (›Gewinn‹ als ‚jede Art von Wohlstandszuwachs‘).<sup>350</sup> Durch die Konstruktionsmetapher (*bauen auf*) wird der GEWINN als notwendige materielle BASIS für das WACHSTUM von HEIDELBERGCEMENT konstruiert und durch den Kausalsatz (*weil [...]*) in seiner Notwendigkeit legitimiert (entgegen der Vorstellung von ›Gewinn‹ als ‚alleiniger Selbstzweck‘). SAP dagegen betont durch die WASSER-Metaphorik im anschließenden Beleg den Aspekt von ›Gewinn‹ als ‚monetärer Überfluss‘:

Mit SAP Business ByDesign hat das energiegeladene Unternehmen nun seine Lieferkette, sein Finanzmanagement und alle anderen Geschäftsvorgänge unter Kontrolle – sodass der Gewinn weiter sprudelt. (SAP GB 2010)

In ähnlicher Weise lehnt sich auch der Ausdruck *Cashflow* an ‚monetärer Überfluss‘ an:

Wir erwirtschaften den notwendigen Cashflow, um unsere vorhandenen Aktivitäten zu erhalten, zu verbessern und externes Wachstum zu finanzieren. (HeidelbergCement Corporate Mission)

Die Absolutheit der Aussage wird von HEIDELBERGCEMENT jedoch wiederum eingeschränkt, indem CASHFLOW nur als *notwendige[n]* Bedingung (durch das finale *um*) für weitere AKTIVITÄTEN (*Aktivitäten zu erhalten, zu verbessern; externes Wachstum*) beschrieben wird. ›Gewinn‹ wird somit wiederum kein ‚alleiniger Selbstzweck‘ zuerkannt.

---

<sup>350</sup> Laut Chiapello (2009, 133) gibt es zwei unterschiedliche Gewinnkonzepte: „Das erste ist im Allgemeinen mit dem dynamischen Standpunkt verbunden: Gewinn ist hier die Marge auf dem Warenumsatz nach Abzug aller für Produktion und Verkauf des betreffenden Gutes angefallenen Kosten. Das zweite versteht dagegen unter Gewinn jede Art von Wohlstandszuwachs, gleichgültig ob dieser den Produktions- und Verkaufstätigkeiten zu verdanken ist oder der Fähigkeit des Unternehmens, mittels Finanzmarkttransaktionen Gewinne zu erwirtschaften.“ (Chiapello 2009, 133).

In ähnlicher Funktion wie *Profitabilität* und *Gewinn* wird der Ausdruck *Umsatz* genutzt, was das Kookkurrenzprofil nahelegt: Beispielsweise findet sich auf der Satzebene wiederum die Kombination von *Umsatz* + *steigern* (+ zu-Infinitiv) (,Umsatzsteigerung‘):

Mit ihrer umfassenden Produktpalette und ihrem internationalen Produktionsverbund ist Lufthansa Technik gut gerüstet, künftig wieder Umsatz und Ergebnis zu steigern. (Lufthansa GB 2010)

Der Aspekt ,Umsatzsteigerung‘ wird auch durch die Metapher *Spitzenwerte* im Kontext von *Umsatz* ausgedrückt:

Wir haben Spitzenwerte beim Umsatz und Ertrag erreicht. (Fresenius GB 2010)

Der Ausdruck *Spitzenwerte* enthält das Morphem \*wert\*, das in diversen Wortbildungen zur Konstruktion von UNTERNEHMENSIDENTITÄT gebraucht wird und bereits unter WERTE (→ dieser Anhang, 1.5.1) in seiner Polysemie thematisiert wurde. *Wert\** in der Lesart ,ökonomisch/materiell‘ taucht dabei häufig zur Bezugnahme auf PROFIT/GEWINN innerhalb von Genitivkonstruktionen auf:

Indem wir Werte für unsere Kunden schaffen, steigern wir auch den Wert unseres Unternehmens. (MAN Unternehmensleitbild)

Die Belege zeigen neben der Verbindung *Wert* + *steigern* (,Wertsteigerung‘) ebenfalls die Kollokation *Werte schaffen* (,Wertschaffung‘). Im nachstehenden Beispiel von INFINEON (*wertvoll\**) ist keine eindeutige semantische Disambiguierung vorgenommen, denn *wertvoll* kann in diesem Kontext nicht nur ,geldwert‘, sondern auch ,bedeutend/kostbar‘ heißen:

Erfolgreiche Bilanz. Wir sind auf dem Weg zum wertvollen Unternehmen. (Infineon GB 2010)

Dagegen ist im folgenden Beleg das Attribut ,ökonomisch/materiell‘ offensichtlich dominant:

Ökonomie: Der Unternehmenserfolg beruht darauf, nachhaltig Wert zu schaffen. (MAN GB 2010)

Auch Komposita wie *Unternehmenswert/Konzernwert* oder *Vermögenswert\**, die den ›Wertträger‹ ,Unternehmen‘ spezifizieren, zeigen die Bedeutung ,ökonomisch/materiell‘ an.<sup>351</sup>

Unsere langfristige Strategie ist darauf ausgerichtet, den Unternehmenswert dauerhaft zu erhöhen. (FMC GB 2010)

S – Steigerung des Konzernwertes: „Wir steigern den Wert der Deutschen Telekom nachhaltig.“ (Telekom T-Spirit – Das Leitbild der Deutschen Telekom)

Auch wenn sie in keiner Bilanz steht, ist sie doch einer unserer bedeutendsten Vermögenswerte: die Marke Merck. (Merck Einzigartig – Der Merck Weg)

Das daneben auftretende Kompositum *Mehrwert* bezieht dabei das Konzept ›Wertzuwachs‹ mit ein. Durch musterhafte Verbindungen mit der Präposition *für* (*Mehrwert für X*) werden zugleich ›Mehrwertadressaten‹ angeführt (,Kunden‘, ,Aktionäre‘, ,Region‘ etc.):

Mehrwert für die Region. (ThyssenKrupp GB 2010)

Mehrwert für den Kunden bedeutet für uns ergänzend auch praktikable Ansätze mit Umsetzungsorientierung. (ThyssenKrupp Unsere Werte)

---

<sup>351</sup> Vgl. dazu auch die seltener auftretenden Komposita *Markenwert* oder *Finanzwert*.



Weitere Komposita im Korpus sind *Wertschaffung*<sup>352</sup>, *Wertschöpfung*<sup>353</sup> (→ dieser Anhang, 1.7.3) sowie *Wertbeitrag*<sup>354</sup>:

In ökonomischer Hinsicht setzen wir auf langfristige Wertschöpfung mit innovativen Produkten und Lösungen. (Siemens GB 2010)

Wie der Beleg von SIEMENS zeigt, werden als direkte Attribute oder im Kontext von *Wert*\* die Adjektive *langfristig\**, *nachhaltig\** oder *verantwortungsvoll\** eingefügt, wodurch der materiell-ökonomische Aspekt wiederum abgemildert wird und Unternehmen sich gegen Eigenmaximierung und einseitige Nutzenstiftung abgrenzen.

Neben diesen eher expliziten Formulierungen, die auf den übergeordneten Sachverhalt PROFIT/GEWINN referieren, finden sich in den Repräsentationstexten aber auch diverse Paraphrasierungen, welche für Laien schwer verständlich sind:

Eine Prämie auf unsere Kapitalkosten verdienen. (BASF Gemeinsam Zukunft gestalten)

Unser wirtschaftliches Ziel ist eine kontinuierliche Steigerung der Ergebnisse durch Kostenführerschaft und ein langfristiges am Ergebnis orientiertes Wachstum der Gruppe. (HeidelbergCement Corporate Mission)

Man beachte dabei, dass die beiden Beispiele nicht aus dem *Geschäftsbericht* stammen, in welchem fachsprachliche Elemente üblich sind. Innerhalb desselben fallen indessen untypische metaphorische Umschreibungen (in Bezug auf PROFIT/GEWINN) auf, wobei meist die Metapher *Früchte* Einsatz findet:

Die Aktie Henkel repräsentiert sozusagen die gesamte „Qualität von Henkel“ und den Wert des Unternehmens. Ihre positive Kursentwicklung in den vergangenen Jahren beweist ebenso wie die Jahresberichte, dass die eingeschlagene Strategie der Markenbildung beachtliche wirtschaftliche Früchte trägt. (Henkel Corporate Identity).

Begibt man sich auf die Sprachhandlungsebene, sind beim Sachverhalt PROFIT/GEWINN weitere aufschlussreiche Beobachtungen möglich. Metareflektierend wird in einigen Beispielen eine Bewertung in der >Zielhierarchie in Bezug auf Profit/Gewinn< vorgenommen:

Profitabilität bleibt bei alledem unser primäres Ziel. Da sich Ökologie und Ökonomie gerade im Luftverkehr auf besondere Weise ergänzen, sehen wir uns in der Verantwortung, die Umwelt zu entlasten und Ressourcen zu schonen, beispielsweise über umfassende Investitionen in eine moderne, treibstoffeffiziente Flugzeugflotte. (Lufthansa GB 2010)<sup>355</sup>

---

<sup>352</sup> Vgl. dazu: „Wir fühlen uns der Wertschaffung verpflichtet.“ (Lufthansa GB 2010).

<sup>353</sup> Vgl. dazu: „Als integrierter Werkstoff- und Technologiekonzern bietet ThyssenKrupp weltweit innovative Produktlösungen, die den nachhaltigen Erfolg unserer Kunden sichern und einen positiven Beitrag zu einer nachhaltigen globalen Entwicklung leisten. Grundlage dafür ist eine verantwortungsvolle und auf langfristige Wertschöpfung ausgerichtete Unternehmensführung.“ (ThyssenKrupp GB 2010). Bei *Wertschöpfung* finden sich auch Attribuierungen durch *ökonomisch\** und *betrieblich\**: „Die ökonomische Wertschöpfung ist für MAN von zentraler Bedeutung und spiegelt sich durch die Erreichung anspruchsvoller Ziele bei der Umsatzrendite und der Rendite auf das eingesetzte Kapital wider.“ (MAN GB 2010).

<sup>354</sup> Vgl. dazu: „Mit Weitblick untersuchen wir strategische Optionen auf ihren langfristigen Wertbeitrag zum Konzern.“ (Lufthansa GB 2010).

<sup>355</sup> Vgl. dazu auch: „Die Ausrichtung auf ganzheitliche Effizienz, nachhaltige Profitabilität, ausgeprägte Kundenorientierung und ertragsorientiertes Wachstum haben absolute Priorität.“ (HeidelbergCement Unser Unternehmensleitbild).

In anderen Belegen wird *Profitabilität* durch Synonyme oder Metonyme ersetzt und das Attribut ‚Profit anderen Zielen gleichgeordnet‘ aufgerufen. Dies wird darüber explizit sprachlich markiert durch die Substantive *Balance* und *Ausgewogenheit*:

Henkel hatte schon immer den Anspruch, eine Balance zwischen Mensch, Umwelt und Gewinnstreben zu schaffen. Diese Einstellung bringt uns einen klaren Wettbewerbsvorteil und hilft mit, unser volles Geschäftspotenzial auszuschöpfen. (Henkel Vision und Werte)

Nachhaltige Unternehmensführung bedeutet für uns, die Ausgewogenheit zwischen Gewinnerzielung und Sicherung der Zukunftsfähigkeit zu gewährleisten. (HeidelbergCement GB 2010)

Die Metapher *zwei Seiten einer Medaille* schafft dazu im nachstehenden Beleg von METRO eine klare Verbildlichung des Attributs ‚Profit anderen Zielen gleichgeordnet‘:

Wirtschaftlicher Erfolg und nachhaltiges Wirtschaften sind für uns zwei Seiten einer Medaille: Profitables Wachstum ist langfristig nur durch verantwortliches Handeln gegenüber Gesellschaft und Umwelt möglich. (Metro GB 2010)

Daneben fällt bei der Belegauswertung auf, dass auch die Ausdrücke *ökonomisch\*/Ökonomie* sowie *wirtschaftlich\*/Wirtschaftlichkeit* zur metonymischen Bezugnahme auf PROFIT/GEWINN genutzt, jedoch insgesamt positiver belegt werden. Diese Ausdrücke erscheinen oftmals in scheinbar als gleichrangig konstituierten ZIELEN (‚Profit anderen Zielen gleichgeordnet‘) sowie im Kontext der Ausdrücke *verbinden* und *vereinbar* (‚mögliche Einheit von Profit und anderen Zielen‘):

Selbst in wirtschaftlich schwierigen Zeiten sind wir davon überzeugt, dass Wirtschaftlichkeit, Versorgungssicherheit und Klimaschutz in einer unternehmerisch erfolgreichen Strategie miteinander vereinbar sind. (E.ON Cleaner and better energy)

Wie bereits angeführt, manifestieren sich in diesen Aussagen die Attribute ‚Profit anderen Zielen gleichgeordnet‘ bzw. ‚mögliche Einheit von Profit und anderen Zielen‘. Jedoch wird in vielen Belegen durch verbale oder adverbale Zufügungen (*neben, dabei auch, schließt [...] ein*) deutlich, dass implizit das Attribut ‚Profitpriorität‘ dominant gesetzt wird:

Bei allen Entscheidungen und Maßnahmen berücksichtigen wir neben wirtschaftlichen auch soziale Aspekte. (HeidelbergCement Corporate Mission)

Der Anspruch von MAN ist, über die gesamte Lebensdauer der Produkte der wirtschaftlichste Anbieter zu sein und dabei auch die Kosten für Umwelt und Gesellschaft zu berücksichtigen. (MAN GB 2010)

Des Weiteren fällt in den Belegen auf, dass in Konkurrenz mit *ökonomisch\*/Ökonomie* Reihungen vorkommen, die größtenteils als triadische Aufzählungen (*ökonomisch\*/Ökonomie, ökologisch\*/Ökologie [und] sozial\*/Gesellschaft*) sachverhaltsverknüpfend wirken (‚mögliche Einheit von Profit mit anderen Zielen‘):<sup>356</sup>

Im Spannungsfeld zwischen Ökonomie, Ökologie und sozialen Aspekten kann letztlich nur derjenige verantwortungsvoll handeln, der alle drei Dimensionen berücksichtigt. Die Begrenztheit natürlicher Ressourcen, die zunehmende Belastung des Ökosystems sowie gesellschaftsrelevante Forderungen wie menschliche Arbeitsbedingungen oder Gleichberechtigung sind ganz wesentliche Faktoren, die das unternehmerische Handeln beeinflussen. (BDF Nachhaltigkeitsbericht 2010)

---

<sup>356</sup> BASF betitelt den *Geschäftsbericht 2010* etwa mit *Ökonomische, ökologische und gesellschaftliche Leistung*.

Wie BEIERSDORF zeigt, wird das Verhältnis der Bereiche ÖKONOMIE, ÖKOLOGIE und SOZIALES/GESELLSCHAFT durchaus als *Spannungsfeld* beschrieben, wodurch es zu Zielkonflikten kommen kann. ÖKONOMIE wird – systembedingt – bei den meisten Belegen an erster Stelle genannt. Bei der Zwillingsformel *ökonomisch und ökologisch* geschieht dies ebenfalls:

Gestärkt durch ein erneutes Absatzplus auf 7,1 Millionen Fahrzeuge, setzt der Volkswagen Konzern seinen Kurs fort, bis 2018 das ökonomisch und ökologisch weltweit führende Automobilunternehmen zu werden. (VW Zahlen.Daten.Fakten)

Das Attribut ‚ökonomisch‘ wird dabei teilweise als kausale Folge von ‚ökologisch‘ dargestellt, was besonders bei HEIDELBERGCEMENT herausgearbeitet wird, und den Raum UMWELT ökonomischen Größen unterordnet (→ dieser Anhang, 1.14):

Umweltschutz besitzt besondere Bedeutung für unsere Mitarbeiter, Mitbürger und Kunden. Er ist auch ökonomisch sinnvoll. Wir setzen gezielt sekundäre Brenn- und Rohstoffe ein und sichern deren Verfügbarkeit. (HeidelbergCement Corporate Mission)

Betrachtet man weitere Kausalitäten innerhalb von Sachverhaltsverknüpfungen, wiederholt sich dieses Muster auch in Zusammenhang mit den anderen sinnverwandten Lexemen: Der Sachverhalt PROFIT/GEWINN wird als ‚alleiniger Selbstzweck‘ abgeschwächt, indem er fast immer

- a) koordinativ mit anderen (verwandten) Sachverhalten (meist WACHSTUM) verknüpft wird;
- b) moralisch aufgewertet wird (unter der Nutzung von Hochwertwörtern).

- ad (a):

Als Unternehmen mit Anspruch auf Spitzenleistung streben wir nachhaltiges Wachstum und Profitabilität auf dem Niveau der Branchenbesten an. (Daimler Unternehmensinformationen 2010)

Mit der Unternehmensstrategie Number ONE erschließen wir uns Schritt für Schritt die Zukunft. Sie eröffnet uns den Zugang zu neuen Kunden, neuen Technologien und neuen Märkten. Sie steht für dynamisches Wachstum und eine starke Profitabilität gleichermaßen. (BMW GB 2010/Strategie)

- ad (b):

Für uns ist die Versicherung der Ärmsten ein Geschäft, das sich wie jedes andere selbst tragen muss. Aber es ist eines, auf das wir sehr stolz sind, weil es helfen wird, unser Land zu verändern. (Munich Re GB 2010)

Vor zwei Jahren war das Jiang County People's Hospital unter der Leitung von Li Ze Hai das erste Krankenhaus der Region, das sich für den SOMATOM Spirit von Siemens entschieden hat. Seitdem hat Krankenhausmanager Li diese Entscheidung keine Sekunde lang bereut: »Der SOMATOM Spirit ist unser ganzer Stolz. Unser Krankenhaus verfügt jetzt nicht nur über die modernste Computertomographie der Region – auch unser Gewinn hat sich verdoppelt.« (Siemens GB 2010)

PROFIT/GEWINN wird durch solche Konstruktionen als ‚alleiniger Selbstzweck‘ negiert. Dieses Muster findet sich variiert in weiteren Sachverhaltsverknüpfungen, die PROFIT/GEWINN als VORAUSSETZUNG für ein höheres ZIEL (metaphorisch durch *Grundlage, Sicherung, Voraussetzung, Maßstab, Chance für X* verstärkt) konstituieren:

- PROFIT/GEWINN → FINANZIELLE INVESTITIONEN;

Gewinn ist die Voraussetzung für Investitionen in Forschung, neue Produkte, Anlagen und Umweltschutz. (HeidelbergCement Corporate Mission)

Eine hohe Profitabilität garantiert uns einen größeren finanziellen Spielraum, gibt uns mehr Flexibilität und Entwicklungsmöglichkeiten. (Henkel GB 2010)

- PROFIT/GEWINN → (VERSORGUNGS-)SICHERHEIT;

Gewinne sind die Voraussetzung für die Sicherung der Zukunft unseres Unternehmens und seiner Arbeitsplätze. (RWE GB 2010)

Nur mit guten Ergebnissen und einem soliden Cash Flow können wir Milliarden von Euro in den Umbau unseres Kraftwerksparks investieren und die Energieversorgung von morgen sicherstellen. (RWE GB 2010)

- PROFIT/GEWINN → GESELLSCHAFTLICHES ENGAGEMENT;

Unser wirtschaftlicher Erfolg bildet dabei die Grundlage unseres gesellschaftlichen Engagements. (BDF Imagebroschüre)

- PROFIT/GEWINN → HANDLUNGSFREIHEIT;

Die Erhaltung der finanziellen Stabilität und Flexibilität ist der Maßstab für unser Vorgehen und sichert unternehmerische Handlungsfreiheit. (HeidelbergCement Corporate Mission)

- PROFIT/GEWINN → WETTBEWERB;

Vor allem die Nachhaltigkeit unserer Profitabilität spielt eine wichtige Rolle: Die von uns erwirtschafteten Erträge müssen die Kapitalkosten decken und Investitionen erlauben, damit wir auf den Finanzmarkt weiterhin wettbewerbsfähig und attraktiv sind. (Infineon GB 2010)

PROFIT/GEWINN wird durch die Bindung an ein höheres ZIEL positiv aufgewertet, indem er nicht als der eigentliche UNTERNEHMENSZWECK anmutet. Damit offenbaren die untersuchten Unternehmen jedoch zugleich eine starke Rechtfertigungshaltung mit der zugrunde liegenden Präsupposition ›Profitstreben als alleiniger Selbstzweck ist moralisch verwerflich‹, was bei MERCK explizit auf Textebene thematisiert wird:

Gute Geschäfte zu machen sollte vor allem bedeuten, sein Geschäft gut zu machen. Merck ist ein Wirtschaftsunternehmen. Selbstverständlich wollen wir Gewinn erzielen – um unsere Zukunft und die der Gesellschaft, in der wir leben, mitzugestalten. (Merck Einzigartig – Der Merck Weg)

MERCK integriert in diesem Beleg den Sachverhalt PROFIT/GEWINN (*selbstverständlich, Geschäft, Gewinn erzielen, Geschäfte machen*) explizit in seine UNTERNEHMENSIDENTITÄT (*Merck ist ein Wirtschaftsunternehmen*). PROFIT/GEWINN wird dabei jedoch zusätzlich – durch das Wortspiel mit *gute Geschäfte* – an ETHIK gekoppelt (*Geschäft gut zu machen, Zukunft, Gesellschaft*), der sich MERCK gleichzeitig verpflichtet. HENKEL greift die Präsupposition ›Profitstreben als alleiniger Selbstzweck ist moralisch verwerflich‹ explizit sprachlich unter der Negation von *Selbstzweck* auf:

Eine wachsende Profitabilität ist kein Selbstzweck. Grundsätzlich können wir nur das Geld ausgeben, das wir zuvor verdient haben. Je mehr wir verdienen, desto mehr können wir in Forschung und Innovationen sowie in unsere Märkte investieren. (Henkel GB 2010)

Durch die Negation *kein Selbstzweck* wird die zugrunde liegende Präsupposition bzw. das *Image* profitorientierter Unternehmen in Bezug auf PROFIT/GEWINN umso mehr deutlich, das HENKEL direkt thematisiert.

Als Synthese des Kapitels lässt sich folgendes festhalten: Wie EFFIZIENZ ist auch PROFIT/GEWINN als ÖKONOMISCHE KENNZAHL/RATIONALITÄTSKRITERIUM insgesamt als Sachverhalt weniger stark sprachlich ausgeprägt als die anderen Sachverhalte im Diskurs. Das Kapitel PROFIT/GEWINN zeigt vor allem eine deutlich heterogenere (lexikalische) Auffächerung des Sachverhalts an. Mit Chiapello (2009, 126) ließe sich dieser Befund eventuell damit erklären, dass die Begriffe des Wortfeldes ›Profit/Gewinn‹ sich gegenseitig definieren (z.B. *Gewinn* baut auf *Ertrag* auf<sup>357</sup>) und abstrakte Größen sind, die sich auf keinerlei physische Realität beziehen. Da sie von hohem Abstraktionsniveau sind, referieren sie nicht auf konkrete GEGENSTÄNDE (z.B. ein WASCHMITTEL), sondern die dahinterstehenden Begriffe verweisen auf „abstrakte Sachverhalte, die erst durch die institutionelle Setzung und Definition der Begriffe selbst entstehen“ (Hundt 2002, 935).<sup>358</sup> Der Sachverhalt PROFIT/GEWINN ist jedoch einer der wenigen fassbaren Gesamteindrücke, den Anspruchsgruppen von Unternehmen bekommen (vgl. Chiapello 2009, 130).<sup>359</sup> Die Belege offenbaren darüber eine markante kommunikative Abschwächung des Sachverhalts PROFIT/GEWINN durch die Attribute ‚Profit anderen Zielen gleichgeordnet‘, ‚mögliche Einheit von Profit mit anderen Zielen‘ und ‚moralische Aufwertung von Profit‘, was auf die Präsupposition ›Profitstreben als alleiniger Selbstzweck ist moralisch verwerflich‹ rückverweist. Letztere reflektiert den Einbezug des gesellschaftlichen Diskurses in die konstruierte UNTERNEHMENSIDENTITÄT, da dieser Unternehmen bei seiner Nichtbeachtung sanktionieren kann.

## 1.2.11 ÖKONOMISCHES UMFELD/KONTEXT

### 1.2.11.1 MARKT

Bei der Konstruktion von UNTERNEHMENSIDENTITÄT in einem Fach-/Vermittlungsdiskurs ist der Marktbegriff im Sprachinventar der Unternehmen zentral, während er im gesellschaftlichen Diskurs ebenfalls häufig negativ stigmatisiert wird (vgl. Kelly-Holmes/Mautner (Hrsg.) 2010<sup>360</sup>). Die prominente Stellung des Sachverhalts MARKT zeigt sich u.a. an der Wortbil-

---

<sup>357</sup> Vgl. dazu Chiapello (2009, 126): „So bezieht sich etwa der Umsatz auf jene Geldsumme, die das Unternehmen als Gegenleistung für den Verkauf möglicherweise sehr unterschiedlicher Güter einnimmt. Das Geld muss noch nicht eingenommen worden und die Produkte mögen einander in keiner Hinsicht ähnlich oder vergleichbar sein, und dennoch lässt sich ein Umsatz berechnen.“

<sup>358</sup> Hundt (2002, 935) beweist diese These anhand des Geldbegriffs. Vgl. dazu ausführlich Hundt (2006).

<sup>359</sup> Die DAX-Unternehmen werden darüber hinaus auch sichtbar, da sie wegen ihrer Börsennotierung einen konsolidierten Abschluss im *Geschäftsbericht* (sowie *Quartalsbericht*) veröffentlichen müssen. Andere Unternehmen, die nicht börslich notiert sind, bleiben dagegen unsichtbar, auch wenn sie erhebliche (finanzielle) Marktmacht haben.

<sup>360</sup> Im Gegensatz zu Ansätzen der CDA (vgl. Kelly-Holmes/Mautner 2010) soll es in dieser Arbeit nicht um Kritik am MARKT („Macht und Ungleichheit“) gehen, sondern primär um deskriptive Beschreibung (Aufdeckung der sprachlichen Strukturen) bei der Konstitution des Sachverhalts MARKT. Dennoch kann dabei nicht

dungsproduktivität des stammbildenden Morphems *\*markt\** (3.673 Hits) im Korpus, was besonders bei DEUTSCHE BÖRSE zur Identitätskonstruktion beiträgt. Der Natur ihres Geschäfts geschuldet finden sich in ihren Repräsentationstexten diverse Komposita mit *\*markt\**.<sup>361</sup> Im gesamten Korpus wird vor allem das Konzept ›Marktart‹ (,Wachstumsmärkte‘) bedient:

Zugang zu den globalen Wachstumsmärkten. (Bayer Namen.Zahlen.Fakten 2010/2011)

Weitere *\*märkte*, die genannt werden, sind meist direkt (metonymisch) an PRODUKTE oder UNTERNEHMEN geknüpft, d.h. es geht um ,Produktabsatzmärkte‘, in denen sich Unternehmen je nach ihrer Ausrichtung verorten:

Mit seinen neun Marken ist der Volkswagen Konzern weltweit auf allen relevanten Automobilmärkten präsent. Zu den Hauptabsatzmärkten gehören aktuell die Region Westeuropa sowie China, Brasilien, USA, Russland und Mexiko. (VW GB 2010)

Die gute Gesamt-Performance der letzten drei Jahre vor dem Hintergrund der Weltfinanzkrise und allgemeiner Verunsicherung auch in den Rohstoffmärkten ist nicht zuletzt als Folge einer erfolgreichen Integration des Handels in eine einzige Einheit zu sehen. Durch die Konzentration der Kräfte und die gebündelte Marktexpertise hat die Handelseinheit eine gute Basis für die nächsten Jahre in einem schnell zusammenwachsenden europäischen und globalen Energiemarkt gelegt. (E.ON Cleaner and better energy)

Sprachliche Oberflächenstrukturen, die ›Marktart‹ anzeigen, sind auch *Markt/Märkte für X* sowie *Markt/Märkte der X*:

Die Märkte für unsere Produkte und Dienstleistungen wachsen. (Fresenius GB 2010)

Um langfristig erfolgreich zu sein, muss die METRO GROUP nicht nur auf dem Markt der Produkte, sondern auch auf dem Markt der Meinungen überzeugen. (Metro GB 2010)

Die Aussage von METRO (*Markt der Meinungen*) ist dahingehend aufschlussreich, als sie auf die inhärente Imagefunktion von Unternehmen hinweist, die den Markterfolg mitbedingt ([...] *erfolgreich zu sein*). Des Weiteren offenbaren die Komposita mit *Markt\** das Konzept ›Marktteilnehmer‹. Viele Unternehmen führen sich dabei aus der Selbstperspektive als *Marktorganisator(en)* oder *Marktmacher* ein. *Marktmacher* wird inzwischen auch fachterminologisch in Englisch (*Market Maker*) gebraucht:

E.ON ist seit Jahren an den wichtigsten Handelsplätzen für Gas in Westeuropa aktiv und sorgt als sogenannter Market Maker an der NCG in Deutschland aktiv für Liquidität und verlässliche Preisstellung. (E.ON Cleaner and better energy)

Die DEUTSCHE BÖRSE bezeichnet sich in ihrem *Claim* desgleichen als *The Markets Company*:

Die Gruppe Deutsche Börse. The Markets Company. (Deutsche Börse Vom Parkett zum elektronischen Handelsplatz)

Diese Bezeichnung sowie die dahinterstehende Konzeptualisierung wird textuell reflektiert:

---

umgangen werden, im Sinne einer linguistischen Aufklärung durch Sprache, tiefer nach den Gegebenheiten der Dinge zu fragen, d.h. zu beschreiben, was diese Auswahl an sprachlichen Zeichen kognitiv bewirken.

<sup>361</sup> Vgl. dazu ›Marktart‹ (*Wertpapiermarkt, Kapitalmarkt, Finanzmarkt, Terminmarkt, Terminmärkte, Aktienmarkt, Kassamarkt, Referenzmarkt, Inlandsmarkt*), ›Marktakteure‹ (*Marktorganisatoren, Marktteilnehmer, Finanzmarktteilnehmer, Marktmacher*), ›Marktteile‹ (*Marktkapitalisierung, Marktdaten, Marktanteil, Marktindikator*) sowie ›Marktorde‹ (*Marktplatz, Kapitalmarktzugang, Marktsegmente*).



Als global agierendes Unternehmen mit zahlreichen Standorten und Mitarbeitern weltweit haben wir uns entschlossen, Mission und Werte ausschließlich in englischer Sprache zu kommunizieren. „We make markets work“ lautet unser gemeinsames Ziel. (Deutsche Börse Die Unternehmenswerte der Gruppe Deutsche Börse)

Somit wird der Sachverhalt MARKT (auch durch die rekurrente Aufnahme des Morphem *\*markt\** in der Wortbildung → FN 361) bei DEUTSCHE BÖRSE explizit an die UNTERNEHMENSIDENTITÄT gekoppelt bzw. diese daraus lexikalisch erschaffen.

Eine weitere Gruppe von Komposita ist für die Analyse aufschlussreich, durch die Unternehmen ihre ›Marktposition‹ (als ‚lokale Angabe im Vergleich zu anderen‘) anzeigen und in einem Feld ihre Position in Relation zu einem WETTBEWERBER (→ dieser Anhang, 1.11.2) einnehmen. Es finden sich diesbezüglich die Ausdrücke *Marktführer*<sup>362</sup> und *Marktposition*<sup>363</sup> sowie *Marktgebiet/-grenzen/-umfeld*<sup>364</sup>. Natürlich geht es bei mehreren (strukturell ähnlichen) Akteuren auch um das Kriterium der Macht, was der Ausdruck *Marktdurchdringung* anzeigt:

Als zentrale Wachstumstreiber sehen wir dabei die noch stärkere Fokussierung auf die Nutzenerwartungen unserer Kunden, die dynamische Entwicklung der Wachstumsregionen, deren Umsatzanteil bereits bei 45 Prozent liegt, sowie die raschere Entwicklung und Marktdurchdringung von Innovationen. (Henkel GB 2010)

Innerhalb der Kompositaanalyse ist zudem auffällig, dass sich auf die ›temporale Marktsituation‹ durch Komposita, die diese vor allem prospektiv perspektivieren, berufen wird:

E.ON hat die vielfältigen Marktperspektiven aus den früheren Einzelgesellschaften Schritt für Schritt zu einer ganzheitlichen europäischen und globalen Sicht auf die Märkte verdichtet und setzt damit Maßstäbe im europäischen Wettbewerb. (E.ON Cleaner and better energy)

Mit innovativen Lösungen adressieren wir Marktchancen und wollen zur Lösung globaler Herausforderungen beitragen. (Bayer Namen.Zahlen.Fakten 2011/2012)

So werden wir unserem Anspruch gerecht, Markttrends zu erkennen und mit innovativen Produkten die Grenzen der Versicherbarkeit auszudehnen. (Munich Re Strategie)<sup>365</sup>

Adjektivkomposita mit *markt\** sind dagegen eher neutral systemspezifizierend oder -lokalisierend (*marktspezifisch\**, *marktorientiert\**, *marktnah\**):

Die Heidelberger Zement Gruppe ist eine Einheit – ein weltweit tätiges, führendes und marktorientiertes Unternehmen. (HeidelbergCement Corporate Mission)

Wir fördern den Erhalt nationaler Identitäten und Kulturen, um möglichst marktnah und kreativ zu sein. (HeidelbergCement Corporate Mission)

Auf der syntagmatischen Ebene finden sich ebenfalls viele Adjektive, die als Attributionen der Form *x Markt* ›Markteigenschaften‹ evozieren: MARKT wird dabei meist als ‚prozessual‘ konstituiert durch die Häufung von *dynamisch\** und *neu\**:

---

<sup>362</sup> Vgl. dazu: „Wir arbeiten daran, wo immer es möglich ist, Marktführer zu werden, und bauen unsere Position durch vertikale Integration aus.“ (HeidelbergCement Corporate Mission).

<sup>363</sup> Vgl. dazu: „Der weitere Ausbau unserer Marktpositionen kann nur in dem Maß gelingen, in dem wir uns vom Wettbewerb unterscheiden.“ (Henkel GB 2010).

<sup>364</sup> Vgl. dazu: „Seit vielen Jahren unterstützt E.ON Initiativen zur Zusammenführung der nationalen Märkte in Europa. Dieses geschieht nicht ohne Grund: Kein Unternehmen hat ein größeres Interesse daran, ein einheitliches Marktgebiet für Strom und Gas in Europa anzustreben.“ (E.ON Cleaner and better energy).

<sup>365</sup> Zur Einordnung des Status quo bedarf es *Marktanalysen*: „Morton Salt führt in regelmäßigen Abständen quantitative und qualitative Marktanalysen durch, um Bekanntheit und Ansehen der Marke Morton® zu überprüfen.“ (K+S GB 2010).

Es entstehen neue globale Wettbewerbsmärkte, die nun auch Absicherungsgeschäfte von Kontinent zu Kontinent möglich und nötig machen. (E.ON Cleaner and better energy)

Durch Adjektive mit ähnlicher Semantik, die durch das Partizip Präsens gebildet werden (*aufstrebend\**, *entwickelnd\**), kommt der prozessuale Charakter von MARKT noch deutlicher zum Vorschein:

Wer Kunden in aller Welt begeistern will, muss vielfältige neue, aufstrebende Märkte erobern und Lösungen bieten. (VW GB 2010)

Wir streben eine ausgewogene Präsenz in reifen und sich entwickelnden Märkten an. (HeidelbergCement Corporate Mission)

Bereits weiter oben im Text wurden die zahlreichen lokalen Spezifizierungen von MARKT beschrieben. Diese geschehen ebenso mittels adjektivischen Attributen, wobei sich die Mehrzahl der Aussagen des Syntagmas *globale\* (x) Märkte\** (›Marktart‹ ‚global‘) bedient:

Fresenius Medical Care hat eine starke Marktposition in globalen, wachsenden und größtenteils nicht-zyklischen Märkten. (FMC GB 2010)

Vw hebt in seinen Repräsentationstexten die große Bedeutung des *chinesischen Marktes* hervor:

Für Volkswagen hat die Bedeutung des chinesischen Marktes in den vergangenen Jahren deutlich zugenommen. Mittlerweile ist der Konzern mit neun Produktionsstätten – sowohl fahrzeugproduzierende Werke als auch Komponentenwerke – in China vertreten. (VW GB 2010)

So integriert Vw in seinen *Geschäftsbericht 2010* auch ein eigenes Kapitel zur GESCHÄFTSENTWICKLUNG des *chinesischen Marktes*:

Aufgrund der anhaltend positiven Geschäftsentwicklung in China und der wachsenden Bedeutung des chinesischen Marktes haben wir erstmals eine Beschreibung von Geschäftsverlauf und Ergebnis unseres Engagements in China in diesem Kapitel eingefügt. (VW GB 2010)

E.ON dagegen fokussiert die ›Marktart‹ ‚europäisch‘, was zuvor im Kapitel HANDEL (→ dieser Anhang, 1.3.2) aufgegriffen wurde. Seltener wird insgesamt auf das Konzept ›Marktart‹ ‚branchenspezifisch‘ eingegangen<sup>366</sup>, sondern der MARKT vielmehr fachsprachlich auf seine ‚Wertigkeit‘ hin bewertet (*etabliert\**, *reif\**, *gesättigt\**, *offen\**):

Die Marke Deutsche Post steht für ein Unternehmen, das weltweit Maßstäbe für Qualität, Technik und Effizienz setzt und sich den Herausforderungen dieses reifen Marktes sehr erfolgreich gestellt hat. (Deutsche Post GB 2010)

Regulatorische Entscheidungen, zunehmend gesättigte Märkte und gut aufgestellte Mitbewerber haben den Wettbewerb verschärft. (Telekom GB 2010)<sup>367</sup>

Zudem fällt auf der Syntagmenebene (und Satzebene) auf, dass mit diversen sprachlichen Mitteln das Konzept ›Markt als konkreter Ort‹ aufgerufen wird, was bereits auf der lexikalischen Ebene durch die Komposita *Marktgrenzenl-gebietl-umfeldl-position* sowie die Metapher *Marktplatz* bei DEUTSCHE BÖRSE offenbar wurde, wobei Letztere als Raummetapher (→

---

<sup>366</sup> Vgl. dazu: „Auf dem virtuellen Markt wächst der Wunsch nach sicherer, vertraulicher und verlässlicher elektronischer Kommunikation.“ (Deutsche Post GB 2010).

<sup>367</sup> Wie die Belege zeigen, geschieht diese Bewertung meist in der Textsorte *Geschäftsbericht* und dient der Darstellung des eigenen Erfolges bzw. der Rahmenbedingungen, denen das Unternehmen ausgesetzt ist.

8.4.3.4) bereits ausführlich Behandlung fand. Mit Isaksson/Jørgensen (2010, 226) gesprochen, erzeugen solche Perspektivierungen (MARKT als MARKTPLATZ) bei den Anspruchsgruppen ein positives Bild des Sachverhalts MARKT, denn der damit aufgerufene *Frame* mit Füllungen wie ‚kaufen‘, ‚verkaufen‘, ‚Warenangebot‘, ‚Händler‘ etc. spielt eine zentrale Rolle innerhalb der heutigen Gesellschaft. Der abstrakte MARKT wird dadurch als ORT veranschaulicht:

In Deutschland wurden 2010 rund 5.500 Terawattstunden Strom elektronisch gehandelt, so viel wie nirgendwo sonst in Europa. Diese Liquidität ist ein Beweis für die hohe Transparenz des Marktplatzes und das Vertrauen, das ihm die Händler entgegenbringen. (RWE GB 2010)

Die Isotopie ‚Platz‘ wird auch durch das Verb *platzieren* im Kontext von *Markt* aufrechterhalten:

Unser integriertes Geschäftsmodell aus Erst- und Rückversicherung ermöglicht es uns, für unsere Kunden maßgeschneiderte Lösungen zu erarbeiten und erfolgreich im Markt zu platzieren. (Munich Re Weiterdenken)

*Platzieren* verweist ferner darauf, dass Unternehmen sich relational zu den anderen Wettbewerbern verhalten und ihren PLATZ durch „evaluatives Manövrieren“ (Mützel 2009, 239<sup>368</sup>) einnehmen. Ferner drückt auch *Position* dies aus:

Der Teilkonzern will damit als globaler Anbieter von hochwertigen, maßgeschneiderten Material und Systemlösungen seine führende Position im Markt und in der Prozesstechnik weiter ausbauen. (Bayer Namen.Zahlen.Fakten 2010/2011)

Durch die lokale Präposition *im* (als Kontraktion der Präposition *in* und des bestimmten Artikels *dem*<sup>369</sup>), die sich in den meisten Belegen auffindet (*im Markt*), wird zusätzlich eine topologische Objektivierung vorgenommen, d.h. ein TEILRAUM wird in einen umfassenderen RAUM integriert (vgl. Köller 2004, 493): Das UNTERNEHMEN wird somit in den MARKT eingegliedert. Ebenso wird das Substantiv *Markt* durch *im* als charakteristischer ORT eingeführt, der dem Rezipienten bekannt ist:

Unsere im Markt einzigartige Erfahrung als Anbieter von sowohl Dialyseprodukten als auch Dialyседienstleistungen macht uns zudem für Partner im Gesundheitswesen immer häufiger zu einem geschätzten Berater – und öffnet uns dadurch die Türen zu neuen Märkten. (FMC GB 2010)

Die Metapher *Türen zu neuen Märkten* (MARKT als HAUS), die FRESenius MEDICAL CARE nutzt, setzt sich dabei auch in weiteren Aussagen fort, v.a. durch das Syntagma *Zugang zu (x) Märkten*. Eine andere Metaphernlinie wird durch MARKT als KAMPF<sup>370</sup> (*umkämpft\**, *schlafkräftig\** + *Markt*) aufgenommen:

---

<sup>368</sup> Mit dem Terminus *Evaluatives Manövrieren* weist Mützel auf die „Positionierungsbestrebungen der einzelnen Marktakteure hin, die nicht strategisch im Sinne rational kalkulierte Handelns oder aufgrund latent wirkender Dispositionen erfolgten, sondern vielmehr das Resultat gegenseitiger Beobachtungen und gemeinsamer Handlungen im lokalen Kontext“ (Mützel 2009, 239f.) seien.

<sup>369</sup> Vgl. dazu auch die Verwendung des bestimmten Artikels im Nominativ Singular, durch welchen der MARKT als eigene, bereits bekannte Entität konstruiert wird: „Erneut wuchsen wir damit stärker als der Markt und bauten die weltweite Marktposition in unseren Märkten weiter signifikant aus.“ (Henkel GB 2010).

<sup>370</sup> Ebenfalls McCloskey (2009, 116) verweist auf “market categories” als “stories about rivalry”.

Unsere Ziele sind ehrgeizig: Wir wollen das attraktivste globale Unternehmen für Haut- und Schönheitspflege werden und unsere Führungsposition in einem umkämpften Markt weiter stärken. (BDF Imagebroschüre)

Eine starke Kapitalbasis und eine klare Positionierung machen uns schlagkräftig und lassen uns in einem dynamischen Markt profitabel wachsen. (Munich Re Weiter denken)

Als letztes dienen der Festigung der Isotopie ›Markt als konkreter Ort‹ die NÄHE-/FERNE- und INNEN-/AUSSEN-Metaphorik.<sup>371</sup>

Eine weitere markante Isotopielinie, die bei der Konstitution von MARKT auftritt und sich bei der Analyse der Syntagmen, Satz- und Textebene zeigt, ist das Konzept ›Markt als Person‹, wobei die Ausdrücke *Markt* und *Märkte* anthropomorphisiert werden:

Wir kennen die Märkte und passen unsere Produkte den individuellen Wünschen und Bedürfnissen der Verbraucher überall auf der Welt an. (BDF Imagebroschüre)

In diesem Zusammenhang ist es wichtig, die Märkte und die dortigen Akteure richtig zu verstehen. (E.ON Cleaner and better energy)

In diesen Beispielen sind die *Märkte* jeweils satzsemantisch in der Rolle des Patiens, was durch die Verben *kennen* oder *verstehen* ausgedrückt wird, während die UNTERNEHMEN (*wir*) Handlungskontrolle besitzen.<sup>372</sup> Zahlenmäßig dominieren allerdings die Belege, in denen der Ausdruck *\*markt* die semantische Rolle des Agens annimmt (›Markt‹ als ‚aktiv Handelnder‘), dessen Forderungen Unternehmen nachgeben. Verbmataphern (*wünscht, braucht, interessiert*) sprechen dem MARKT dabei agentive Handlungsmacht zu:

Zement, Beton und Zuschlagstoffe sowie Baustoffe – das sind unsere Kompetenzfelder. In diesen Bereichen produzieren wir die Produkte, die der Markt wünscht und braucht. (HeidelbergCement Corporate Mission)

Der Kapitalmarkt interessiert sich dafür, ob wir auf globale Herausforderungen wie die demografische Entwicklung oder den Klimawandel vorbereitet sind. (Metro GB 2010)

Durch diese Aussagen erscheint das UNTERNEHMEN als passive Entität, welches *Bedürfnisse[n]*<sup>373</sup> einer anderen Entität (MARKT) folgt. Laut Attig dienen solche Agentisierungen dazu, einen „gewichtigen ökonomischen Tatbestand zu verdrängen: nämlich den Anteil, den die Menschen durch Produktivität und Konsum an der ökonomischen Entwicklung haben“ (Attig

---

<sup>371</sup> Diese Dichotomien werden durch das Prinzip ›zusammenwachsende Märkte‹ überwunden: „E.ON hat sich als Ziel gesetzt, Energie sauberer und besser zu machen. Hierfür werden wir uns in Europa künftig auf Wettbewerbsgeschäfte konzentrieren und dabei in zusammenwachsenden Energiemärkten verstärkt Synergien zwischen den Geschäften und Geschäftsfeldern nutzen.“ (E.ON GB 2010); „Das breite E.ON-Portfolio von Energie-Assets in fast allen Teilen des Kontinents kann nur dann optimal gesteuert und genutzt werden, wenn der Austausch über die Marktgrenzen hinweg problemlos und ungehindert möglich ist.“ (E.ON Cleaner and better energy). Der letzte Beleg verweist auch auf die „Grenzmetaphorik“ (Attig 2013, 294) bei MARKT.

<sup>372</sup> Vgl. dazu auch die folgenden Syntagmen: „Die Mitglieder des Vorstands und das Investor-Relations-Team haben zudem in zahlreichen Einzelgesprächen und auf Konferenzen intensiven Kontakt zum Kapitalmarkt gepflegt.“ (Deutsche Post GB 2010).

<sup>373</sup> Vgl. dazu auch: „Die Forschungs- und Entwicklungsaktivitäten orientieren sich eng an den Marktbedürfnissen und unterliegen dementsprechend einem kontinuierlichen Anpassungsprozess.“ (Bayer Namen. Zahlen.Fakten 2010/2011).

2013, 298). Interessant sind dahingehend auch folgende Verbmetaphern, die eine (positive) Handlungsreaktion des MARKTES auf ein Handeln des UNTERNEHMENS suggerieren:<sup>374</sup>

Wir konzentrieren uns auf Märkte, die Innovationen brauchen und honorieren. (Merck Stabile Einheit: Leitbild, Werte, Strategie)

Bei Merck sind Pharma, Chemie und Life-Science unter einem Dach vereint. Wir sind davon überzeugt, dass der Markt in diesen Bereichen Forschungserfolge und technologischen Fortschritt mit attraktiven Margen belohnen wird. (Merck GB 2010)

Die Personifikation von *Markt/Märkte* wird weiterhin deutlich durch die folgenden Aussagen, die dem MARKT ‚emotionale‘ oder ‚physische‘ VERHALTENSEIGENSCHAFTEN zuschreiben:

Das Vertrauen der Finanzmärkte in Merck spiegelt sich in der erfolgreichen Emission einer Euro-Anleihe zur Finanzierung der Millipore-Akquisition wider. (Merck GB 2010)

Die *Critical Discourse Analysis* moniert diese Personifikation (mit zunehmender Verabsolutierung) (vgl. Mautner 2010; Koller 2010). Gleichwohl zeigte dieses Kapitel anschaulich, wie der MARKT als ORT diskursiv erschaffen wird, indem sich Unternehmen innerhalb einer unterstellten Marktordnung positionieren und anderen Wettbewerbern Informationen darüber geben, wie sie den MARKT und sich selbst in *Position* dazu sehen. Aus diesen Verkettungen, die evaluierend (*schwierig*) und strukturierend (*Marktführer*) wirken, entsteht ein abgeschlossener RAUM (= MARKT), in welchem sich die untersuchten Unternehmen verorten (>Markt als konkreter Ort<) und daraus IDENTITÄT indizieren. Durch die Ontologisierung von MARKT (>Markt als Person<) wird die eigene Verantwortlichkeit der Unternehmen jedoch ausgeklammert, die scheinbar nur dem Marktwillen nachkommen (vgl. Isaksson/Jørgensen 2010, 226).<sup>375</sup>

### 1.2.11.2 WETTBEWERB

Bereits im Kapitel MARKT wurde der Sachverhalt WETTBEWERB angesprochen und soll in diesem Kapitel vertieft werden, da dieser Unternehmen ebenfalls dazu dient, sich implizit auf das zugrunde liegende ökonomische (marktwirtschaftliche) System, in dem sich die Dax-30-Unternehmen befinden, zu beziehen (\**wettbewerb*\* besitzt 798 *Hits* in den Konkordanzen). Sprachhandlungstheoretisch gesehen, geht es dabei um eine Sachverhaltsverortung in einer spezifischen Domäne (WIRTSCHAFT), indem eine (indirekte) Referenz auf das zugrunde liegende Wirtschaftsmodell stattfindet (vgl. Felder 2011c): Die >Wettbewerbsart< ‚marktwirt-

---

<sup>374</sup> Der Vollständigkeit halber sollen hierbei noch weitere physische Befindlichkeiten des MARKTES mittels Adjektiven (*schwach\**, *schleppend\**, *reif\**, *gesättigt\**, *gesund\**) aufgeführt werden, die oben teilweise unter >Markteigenschaften< behandelt wurden und bereits als institutionalisierte Metaphern in der Fachsprache (der Banken) fungieren (vgl. Hundt 2002, 937). Die These, dass links- und rechtsseitige Kollokationen, oft in Konstruktionen mit *sein* + Attribut und Partizip, den MARKT als handelndes und empfindendes Agens darstellen, bestätigen Isaksson/Jørgensen (2010, 226) in ihrem Aufsatz *Virtues and Emotions for the Market*.

<sup>375</sup> Syntagmen wie *X* [menschliches Attribut] + *des Marktes* oder *der Markt* + Verbmetapher verfestigen sich allerdings sprachlich (und existieren bereits in der Fachsprache als tote Metaphern, s.o.).



schaftlich‘ wird von den Unternehmen dabei jedoch meist präsupponiert und nicht explizit thematisiert.<sup>376</sup> Metonymische Ersetzungen geschehen durch Syntagmen wie *im/frei\* + Wettbewerb*:

Das Sport-Engagement ist sowohl Bekenntnis zu Leistungsbereitschaft im Wettbewerb als auch ein Bekenntnis zur sozialen Verantwortung des Unternehmens. (Lufthansa GB 2010)

Wenn wir unsere Stromproduktion im Großhandel absetzen, dann zum marktüblichen Preis. Diesen legen nicht wir fest; vielmehr bildet er sich im freien Wettbewerb auf offenen Märkten wie z.B. der Strombörse EEX. (RWE GB 2010)

RWE entzieht sich durch das Syntagma *im freien Wettbewerb* jeglicher Verantwortung für die PREISBILDUNG. Metaphorisch und durchaus drastisch formuliert MAN aufgrund der Metapher *freie[s] Spiel der Kräfte im Wettbewerb*.<sup>377</sup> Aufschlussreich ist diesbezüglich auch der Hinweis von K+S auf *Herausforderungen und Widersprüche[n], die sich im marktwirtschaftlichen Wettbewerb immer wieder ergeben*, da diese Aussage eine negative Konnotation von ›Wettbewerbsart‹ ‚marktwirtschaftlich‘ anzeigt:

[...] Alle teilnehmenden Unternehmen bekennen sich mit dem Leitbild nicht nur zu verantwortlichem unternehmerischen Handeln, sondern beziehen auch konkret Stellung zu den Herausforderungen und Widersprüchen, die sich im marktwirtschaftlichen Wettbewerb immer wieder ergeben. (K+S GB 2010)

Auch im nächsten Beleg von BMW wird durch *ohne Einschränkung* ein negatives Image der MARKTWIRTSCHAFT präsupponiert:

Die BMW Group bekennt sich ohne Einschränkung zu den Prinzipien der Marktwirtschaft und des fairen Wettbewerbs. (BMW Verhaltenskodex)

BMW nimmt durch *bekannt* indessen eine klare Seins-Positionierung bezüglich der Sachverhalte MARKTWIRTSCHAFT und WETTBEWERB vor, um sich selbst in diese Deutungsrahmen einzuordnen. Durch die Hinzufügung des Adjektivs *fair\**<sup>378</sup> von BMW wird zugleich eine Abgrenzung von Konnotationen wie ‚ungezügelt‘, ‚haltlos‘ und ‚wuchernd‘ erreicht, welche zu Zeiten der FINANZ- UND WIRTSCHAFTSKRISE (→ dieser Anhang, 1.12.1) in der Sprachgemeinschaft geläufig sind. Weitere Zuschreibungen an das Konzept ›Wettbewerbsart‹ erfolgen im Korpus durch das Attribut ‚intensiv‘:

Im Europaverkehr befinden wir uns [...] im intensiven Wettbewerb mit allen Verbund-Airlines. (Lufthansa GB 2010)

Eher negativ konnotierte Adjektive sind diesbezüglich *schwierig* oder *hart*:

Unsere Marken stehen im harten Wettbewerb mit nationalen und internationalen Anbietern. Klar und einprägsam aufgestellt, erleichtern sie Kauf- und Investitionsentscheidungen. (Deutsche Post GB 2010)

---

<sup>376</sup> Da alle Unternehmen im Korpus in der ›Wettbewerbsart‹ ‚marktwirtschaftlich‘ verortet sind, lässt sich durchaus fragen, warum nur wenige darauf explizit Bezug nehmen oder Einschränkungen vornehmen.

<sup>377</sup> Vgl. dazu: „Das freie Spiel der Kräfte im Wettbewerb und eine verantwortungsvolle Unternehmensführung sind für MAN wesentliche Stellhebel für eine nachhaltige Unternehmensentwicklung.“ (MAN GB 2010).

<sup>378</sup> Vgl. dazu auch: „Unternehmerischer Erfolg durch Leistung setzt fairen Wettbewerb voraus.“ (BMW Verhaltenskodex). Vgl. dazu auch die Doppelung: „Wir nutzen den freien und fairen Wettbewerb als Rahmen unserer unternehmerischen Aktivitäten.“ (MAN Unternehmensleitbild).



Bei folgenden Belegen ließe sich wiederum von WETTBEWERB als KAMPF, was bereits bei MARKT auftrat (→ dieser Anhang, 1.11.2), sprechen:

Hingegen verzeichnete CropScience in einem schwachen Marktumfeld mit aggressivem Wettbewerb einen Rückgang des ebitda vor Sondereinflüssen um 14,3 Prozent auf 1.293 Millionen. (Bayer Namen. Zahlen. Fakten 2010/2011)

Diese Perspektivierungen kritisieren implizit die Logik des WETTBEWERBS, in der ein Produkt das nächste ersetzt, bis ein neues in den Kreislauf kommt. Adverbien, die einen ›Anstieg‹ ausdrücken (*zunehmend\**, *mehr + Wettbewerb*), drücken diese Wettbewerbsdynamik aus:

Für die Deutsche Post AG ergeben sich aus der Liberalisierung der Postmärkte Risiken durch mehr Wettbewerb in Deutschland, aber auch Chancen auf den anderen europäischen Postmärkten. (Deutsche Post GB 2010)

Schließlich werden auch diverse Attribute, die eine ‚globale‘ Typisierung von WETTBEWERB vornehmen, diskursiv aufgeführt. Dabei verorten sich Unternehmen, neben ‚europäisch‘<sup>379</sup>, vor allem durch ‚international‘ und ‚global‘:

Wir wollen im internationalen Wettbewerb gewinnen. (HeidelbergCement Corporate Mission)

In der weiteren Analyse offenbaren sich Komposita, welche das Konzept ›Wettbewerbsphysis‹ evozieren (*Wettbewerbskraft*<sup>380</sup>, *Wettbewerbsstärke*). Dieses Konzept wird jedoch nicht nur unter positiver Konnotation aufgerufen, sondern – häufig in Konkurrenz mit *steigen/steigend\**, *erhöhen/erhöht\** oder *hoch/hohe\** – als ›Bedrohung‹ durch den WETTBEWERB inszeniert:

So steht die Pharmaforschung unter hohem Wettbewerbsdruck, schneller und präziser neue Arzneimittel suchen und identifizieren zu müssen. (Merck GB 2010)<sup>381</sup>

Dass der Sachverhalt WETTBEWERB auch genutzt wird, um den Differenzcharakter von UNTERNEHMENSIDENTITÄT hervorzuheben, zeigt sich ebenso anhand der Kompositaanalyse.<sup>382</sup> Komposita wie *Wettbewerbsvergleich*, *Wettbewerbsvorteil\** und *Wettbewerbsvorsprung* setzen andere WETTBEWERBER voraus, von denen sich abgegrenzt wird:

Und wie ist Daimler für die Verschiebung der Nachfrage in Ländern wie China, Indien oder Russland im Wettbewerbsvergleich gerüstet? Wir sind gut darauf vorbereitet. (Daimler Unternehmensinformationen 2010)

Wir haben die Kompetenzführerschaft bei der Erschließung von „emerging markets“ für moderne Handelsformate. Diese Stellung wissen wir als Wettbewerbsvorsprung für unser Unternehmen zu nutzen. (Metro Corporate Principles)

---

<sup>379</sup> Vgl. dazu: „In Steinsalzbergwerken und Solbetrieben wird das nützliche Mineral mit einem Reinheitsgrad von bis zu 99% gewonnen. Dieser Reinheitsgrad nimmt im europäischen Wettbewerb einen Spitzenplatz ein.“ (K+S GB 2010).

<sup>380</sup> Vgl. dazu: „Wir optimieren unsere Verfahren, um die Umweltauswirkungen weiter zu verringern und die Wettbewerbskraft unserer Standorte zu stärken.“ (K+S GB 2010).

<sup>381</sup> Vgl. dazu auch: „Mit innovativen Produkten, die auf die Bedürfnisse von Privathaushalten und Gewerbebetrieben zugeschnitten sind, ist es uns 2010 gelungen, unsere Marktposition trotz steigender Wettbewerbsintensität zu behaupten.“ (RWE GB 2010).

<sup>382</sup> Kaum wird *\*wettbewerb* als zweite Konstituente innerhalb der Komposita genutzt. Vgl. dazu: „Durch langfristige Einkaufsverträge hat sich E.ON eine strategische Bezugsbasis im zunehmend globalen Nachfragewettbewerb um Erdgas geschaffen [...]“. (E.ON Cleaner and better energy).

Bei METRO findet sich im letzten Beleg zusätzlich zur sprachlichen Abgrenzung durch *Wettbewerbsvorsprung* eine Inklusionshandlung (*unser Unternehmen*) zur Bildung einer IDENTITÄT nach ‚innen‘. Wie bei MARKT erscheint daneben auch bei WETTBEWERB das Konzept ›Wettbewerbsposition‹ (als ‚lokale Angabe im Vergleich zu anderen‘) durch *Wettbewerbsposition* und *Wettbewerbsumfeld*<sup>383</sup>. Dabei wird oftmals eine Bewertung durch affektive Adjektive vorgenommen:

Wir sind in einer exzellenten Wettbewerbsposition. In einer Vielzahl unserer Geschäfte nehmen wir eine führende Markt- und Technologiestellung ein. Diese exzellente Wettbewerbsposition wollen wir nicht nur halten, sondern ausbauen. (Siemens GB 2010)

Ebenso durch Rangfolgen, die mittels Numeralien ausgedrückt werden, geschieht ein Sachverhaltsfestsetzungsversuch von WETTBEWERBSPOSITION:

Absatzmärkte und jeweilige Wettbewerbspositionen Central Europe

- Nr. 3 in der Stromerzeugung
- Nr. 2 im Strom-/Gasvertrieb
- [...]. (E.ON GB 2010)

Im Vergleich zu den meisten anderen Unternehmen liefert E.ON im aufgeführten Beleg relativ konkrete Informationen (in Bezug auf KONTINENT, LAND und PRODUKTBEREICH), aufgrund welcher eine WETTBEWERBSPOSITION beansprucht wird. Neben *Wettbewerbsposition* wird auf der lexikalischen Ebene das Kompositum *Wettbewerbsfähigkeit* seriell gesichtet, das die physisch-mentale Komponente für die Situierung im WETTBEWERB betont (›mentale Wettbewerbsfertigkeiten‹):

Von strategischer Bedeutung ist unsere Wettbewerbsfähigkeit. Erreichbar ist sie nur durch ökonomisch wie ökologisch innovative Produktionstechnologien und von uns geförderte hohe Qualitätsstandards. (HeidelbergCement Corporate Mission)

In der Belegdurchsicht zeigt sich, dass es in den Aussagen um die Konzeptattribute ‚Erhaltung der Wettbewerbsfähigkeit‘ und ‚Steigerung der Wettbewerbsfähigkeit‘ geht. Ersteres Attribut wird u.a. durch das Verb *sichern* aufgerufen:

Unsere Forschung und Entwicklung (F&E) zielt darauf ab, Lösungen für eine umweltschonende, zuverlässige und bezahlbare Energieversorgung zu entwickeln und dadurch unsere Wettbewerbsfähigkeit langfristig zu sichern. (RWE GB 2010)

Das zweite Attribut manifestiert sich durch musterhafte Verbindungen von *Wettbewerbsfähigkeit + weiterentwickeln/steigern*:

Als Arbeitgeber und Auftraggeber wollen wir daran mitwirken, die Wettbewerbsfähigkeit der Regionen, in denen wir tätig sind, weiterzuentwickeln und einen Beitrag zur Lösung sozialer, ökologischer und bildungspolitischer Herausforderungen zu leisten. (Daimler GB 2010)

LUFTHANSA ist dabei mit solchen Aussagen zu WETTBEWERBSFÄHIGKEIT stark präsent:

Wir bauen unsere Wettbewerbsfähigkeit gegenüber anderen Standorten, Fluggesellschaften und Allianzen durch eine starke Systemintegration aus. Wir arbeiten mit wesentlichen Partnern, Lieferanten und Infra-

---

<sup>383</sup> Vgl. dazu: „Mit exzellenten Produkten befriedigen wir die gestiegenen Kundenbedürfnisse in einem veränderten Wettbewerbsumfeld.“ (Lufthansa GB 2010).

struktur-Anbietern eng zusammen, um die Kernprozesse zu integrieren und zu optimieren. (Lufthansa Leitlinien)<sup>384</sup>

Unterstützend zieht LUFTHANSA auch die Text-Bild-Ebene heran, wobei *Wettbewerbsfähigkeit* als ZIEL (Ziel[e]) WETTBEWERBSFÄHIGKEIT festgesetzt und zugleich durch den Ausdruck [b]essere bewertet wird:

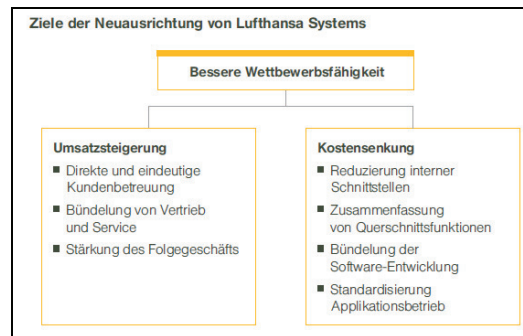

Abbildung 106 - Lufthansa GB 2010

Ebenso unter den adjektivischen Komposita dominiert *wettbewerbsfähig*<sup>385</sup>, wodurch substantivisch ›Wettbewerbsträger‹ angeschlossen werden können (,Standorte‘, ,Arbeitsumfeld‘ und ,Mitarbeiter‘):

Wir bekennen uns zum Standort Deutschland, der als wettbewerbsfähiger Industriestandort gut ausgebildeten Fachkräftenachwuchs braucht. (K+S GB 2010)

Zu einem wettbewerbsfähigen Arbeitsumfeld zählen auch eine attraktive Vergütung sowie ansprechende Nebenleistungen. (E.ON GB 2010)

Unsere Beschäftigten sollen auf qualitativ hohem Niveau entwickelt und gefördert werden. Unser Ziel ist es, auch für die Zukunft eine wettbewerbsfähige Belegschaft sicherzustellen. (Daimler GB 2010)

Bei der Auswertung der Syntagmen wird daneben das Konzept ›Wettbewerbsregularien‹ durch den Ausdruckskomplex *Prinzipien/Regeln des (x) Wettbewerbs* integriert:

Wir werden unsere Geschäfte in Europa allerdings stärker fokussieren und uns auf die Aktivitäten und Märkte konzentrieren, die nach Regeln des Wettbewerbs funktionieren. (E.ON Cleaner and better energy)

Wir achten die Regeln des freien Wettbewerbs. (K+S Grundwerte)

Neben der Konstruktion *Prinzipien/Regeln des (x) Wettbewerbs* taucht auch die lokale Angabe *Position/Platz/Plätze im Wettbewerb* auf, durch die das Konzept ›Wettbewerb als konkreter Ort‹ aufgerufen wird, das sich in ähnlicher Weise bei MARKT auffand:

Durch den Erwerb und die Veräußerung von Unternehmen stärkt die BMW Group ihre Position im Wettbewerb. (BMW Verhaltenskodex)

Mithilfe aktueller Benchmark- Analysen wollen wir sicherstellen, dass Siemens an allen regionalen Märkten und in allen Sektoren führende oder mindestens zweite Plätze im Wettbewerb um Marktanteile und Technologiepositionen einnimmt. (Siemens GB 2010)

<sup>384</sup> Vgl. dazu auch: „Von den auf diese Weise geschaffenen Wachstumsperspektiven und der gesteigerten Wettbewerbsfähigkeit des Lufthansa Konzerns profitieren alle Interessengruppen.“ (Lufthansa GB 2010); „Mit kostengünstigen Standorten erhöht Lufthansa Technik ihre Wettbewerbsfähigkeit; dazu trägt auch der schon vor Jahren erfolgte Eintritt in den asiatischen Markt bei.“ (Lufthansa GB 2010).

<sup>385</sup> Dies wird in geringerer Weise auch adjektivisch markiert: „Wettbewerbsbeschränkende Ansprachen sind tabu.“ (BMW Verhaltenskodex).

Ähnlich wie bei den Komposita (*Wettbewerbsposition* etc.) zielen Unternehmen durch solche Äußerungen darauf ab, eine besondere POSITION *im* WETTBEWERB zu finden. Fügungen wie *Alleinstellungsmerkmal im Wettbewerb* oder *Differenzierungsmerkmal im Wettbewerb* bestätigen diese These und weisen auf UNTERNEHMENSIDENTITÄT zurück

Ziel ist es, die Vorteile des Einkaufs im Internet mit denen des stationären Handels zu kombinieren, um durch Service, Authentizität und Qualität ein Alleinstellungsmerkmal im Wettbewerb zu schaffen. (Metro GB 2010)

Wir sind überzeugt, dass gerade vor dem Hintergrund steigender Produktstandardisierung Service ein wichtiges strategisches Differenzierungsmerkmal im Wettbewerb ist. (Siemens GB 2010)

INFINEON assertiert vierfach *Differenzierungskriterien im Wettbewerb sind X*:

Differenzierungskriterien im Wettbewerb sind das Produkt-Design, die technische Leistungsfähigkeit, der Preis, die Produktionskapazität, die Produkteigenschaften, die Vereinbarkeit von Produktsystemen, die Lieferzeit, die Qualität sowie der Grad an technischer Unterstützung, den wir unseren Kunden bieten können. (Infineon GB 2010)

Die Position der Unternehmen kann zusätzlich räumlich spezifiziert werden, indem WETTBEWERB durch Konstruktionen wie *im (x) Wettbewerb* als ‚vertikaler Raum‘ erscheint:

E.ON hat die vielfältigen Marktperspektiven aus den früheren Einzelgesellschaften Schritt für Schritt zu einer ganzheitlichen europäischen und globalen Sicht auf die Märkte verdichtet und setzt damit Maßstäbe im europäischen Wettbewerb. (E.ON Cleaner and better energy)

Dagegen wird WETTBEWERB als ‚horizontaler Raum/Weg‘ durch Ausdrücke wie *Vorsprung* oder *Vorteil* mit dem Präfix *vor-* perspektiviert. Letztere implizieren nicht nur, dass es weitere WETTBEWERBER gibt, sondern auch, dass man sich räumlich *vor* diesen befindet:

Die Vielfalt bei der Zusammensetzung unseres Führungsteams und der Fokus auf Leistungsbereitschaft, fachliche Kompetenz und Übereinstimmung mit unseren Unternehmenswerten sehen wir als entscheidende Vorteile im globalen Wettbewerb. (HeidelbergCement GB 2010)

Wie bei MARKT zeigen sich auch bei WETTBEWERB unter den Syntagmen der Form *X im Wettbewerb* solche Formen ohne X-Konstituente, die nur als lokale Angabe (*im Wettbewerb*) fungieren und WETTBEWERB metonymisch als ORT festsetzen:<sup>386</sup>

Im Wettbewerb vertrauen wir darauf, dass wir unsere Kunden allein durch die Qualität unserer Produkte und Leistungen nachhaltig überzeugen können. (MAN Unternehmensleitbild)

Zuletzt markiert das musterhafte Syntagma *Wettbewerb um X* die ›Wettbewerbsziele‹ von Unternehmen: Es handelt sich um ‚nicht-belebte Objekte‘ (*Technik, Innovationen, Produkte*<sup>387</sup>) sowie ‚Personen‘ (*Kunden, Mitarbeiter*<sup>388</sup>). HENKEL kombiniert beide Konzeptattribute strukturell mittels einer Alliteration und Metonymie (*Köpfe und Kapital*):

---

<sup>386</sup> Durch das Relativpronomen *wo* wird zudem eine ›Richtungsangabe‹ möglich: „Damit wir immer wissen, wo wir im Wettbewerb stehen und welche Potenziale wo auf uns warten, betreibt Siemens ein differenziertes Benchmarking.“ (Siemens GB 2010).

<sup>387</sup> Vgl. dazu: „Als attraktiver Arbeitgeber möchte Daimler weiterhin im Wettbewerb um die beste Technik das Unternehmen der Wahl sein.“ (Daimler Das Unternehmen 2011).

<sup>388</sup> Vgl. dazu: „Im Wettbewerb um die besten Mitarbeiter stellen wir uns weltweit auf sich wandelnde Lebensformen ein.“ (HeidelbergCement GB 2010).

Wichtige Unterstützung leistet die Unternehmensmarke Henkel schließlich auch im Wettbewerb um Köpfe und Kapital. Gerade auf den Personal- und Finanzmärkten erweist sie sich von unschätzbarem Wert. (Henkel Corporate Identity)

Auf der Satzebene findet sich das Konzept ›Wettbewerbshandlung‹ durch die Verbindung von (im) *Wettbewerb* + Verb. Das Konzeptattribut ‚Wettbewerbsstatik‘ wird durch Verben wie *sein* oder *stehen* aufgerufen:

In allen Regionen stehen wir im Wettbewerb mit starken lokalen Anbietern, besonders im Wachstumsraum Asien / Pazifik. (Deutsche Post GB 2010)

Dominierend ist jedoch das Konzept ›Wettbewerbshandlung‹ in Verbindung mit den Verben *durchsetzen* und *behaupten* (‚Wettbewerbsbehauptung‘):

Nur mit modernen informationstechnischen Lösungen können sie [Unternehmen, S.B.] sich erfolgreich im Wettbewerb und um neuen globalen Marktumfeld durchsetzen. (SAP GB 2010)

Vor diesem Hintergrund müssen Unternehmen ihr Geschäftsmodell immer wieder neu ausrichten – etwa wenn sie Schwellenmärkte und neue, unbekannte Branchen erschließen oder sich als Unternehmensnetzwerk anstatt als Einzelunternehmen im Wettbewerb behaupten wollen. (SAP GB 2010)

In diesen Belegen fällt wiederum die Darstellung von WETTBEWERB als KAMPF auf. Eine weitere Parallele der Sachverhalte MARKT – WETTBEWERB ist, dass der WETTBEWERB ebenso als PERSON konstruiert wird (›Wettbewerb als Person‹). WETTBEWERB wird durch *der Wettbewerb*<sup>389</sup> agentisiert und in Präpositionalkonstruktionen (*gegenüber dem Wettbewerb*) metonymisch als Referenzinstanz angesetzt, von welcher eine Differenzierung vorgenommen wird (‚Wettbewerb als Differenzinstanz‘):

So ist seit Anfang 2010 die neue E-Klasse-Familie mit allen vier Modellvarianten verfügbar; das gibt uns einen Vorsprung gegenüber dem Wettbewerb. (Daimler Unternehmensinformationen 2010)

Das Differenzkriterium wird durch das Präpositionalobjekt *vom Wettbewerb* in Kombination mit Verben wie *differenzieren*, *abgrenzen*, *abheben* oder *unterscheiden* verstärkt:

Wir werden den Ansatz „One DHL“ weiterführen und ein einheitliches Image etablieren, mit dem wir die Marke DHL klar vom Wettbewerb abgrenzen. (Deutsche Post GB 2010)

Der weitere Ausbau unserer Marktpositionen kann nur in dem Maß gelingen, in dem wir uns vom Wettbewerb unterscheiden. (Henkel GB 2010)<sup>390</sup>

In diesen Aussagen wird Identitätsstiftung somit über die Differenzsetzung vom WETTBEWERB (*vom Wettbewerb*) vorgenommen, der metonymisch für WETTBEWERBER steht.<sup>391</sup> Das Konzept ›Wettbewerber‹ wird auch direkt durch das Substantiv *Wettbewerber* lexikalisch evoziert und tritt ebenfalls häufig in Kookkurrenz mit den Verben *unterscheiden* oder *differenzieren* auf, wodurch das Differenzkriterium wieder aufgenommen wird:

---

<sup>389</sup> Vgl. dazu: „Seither [seit 2008, S.B.] hat sich der Wettbewerb verschärft.“ (Deutsche Post GB 2010).

<sup>390</sup> Vgl. dazu: „Um das Reiseerlebnis immer angenehmer zu gestalten, entwickeln wir exzellente Lösungen, die uns vom Wettbewerb abheben [...]“. (Lufthansa GB 2010).

<sup>391</sup> Neben Konstruktionen, die den WETTBEWERB als personale Entität darstellen, werden aber auch Bezugnahmen auf ORGANISATIONEN, die miteinander in WETTBEWERB stehen, vorgenommen (›Wettbewerber‹): „Auf dem deutschen Markt steht E.ON im Wettbewerb mit insgesamt knapp 1.300 Energieunternehmen.“ (E.ON Cleaner and better energy).

Von unseren Wettbewerbern unterscheiden wir uns durch innovative Produkte, mit denen wir auf die Anforderungen von Kunden und Märkten reagieren. (Deutsche Post GB 2010)

Mit neuen, innovativen Diensten und Tarifen können wir uns besser gegenüber Wettbewerbern differenzieren. (Telekom GB 2010)

Es geht dabei um die Konzeptattribute ‚Wettbewerberunterscheidung‘ (meist durch *Produkte*), was MERCK reflektiert:

Auf den ersten Blick sind es oft die Produkte, die ein Unternehmen von seinen Wettbewerbern unterscheiden. (Merck Einzigartig – Der Merck Weg)

Semantisch nahe zum Konzeptattribut ‚Wettbewerberunterscheidung‘ befindet sich ‚Wettbewerbervergleich‘, was durch adverbiale Angaben (*gegenüber X, im Unterschied/Vergleich zu X*) aufgerufen wird:

Die Markenstrategien unserer Geschäftsfelder, zum Beispiel »Das Beste oder nichts« bei Mercedes-Benz Cars, tragen dazu bei, die Markenprofile gegenüber den Wettbewerbern weiter zu schärfen und unsere Unternehmensaktivitäten daran auszurichten. (Daimler GB 2010)

Hierzu gehören auch direkte Bewertungen der eigenen Position (*besser als (x) Wettbewerber*):

Wir wollen dauerhaft besser sein als unsere Wettbewerber. (Siemens GB 2010)

Daneben präsentiert sich das Konzeptattribut ‚Wettbewerberabscheidung‘, welches durch das Präfix *ab-* in der Verbindung der Ausdrücke *von Wettbewerber\* + abheben, absetzen* oder *abgrenzen* aufgerufen wird:

Im europäischen Vertriebsgeschäft will sich E.ON mit intelligenten Produkten für Privatkunden – wie beispielsweise Mikro-KWK-Anlagen in Einfamilienhäusern – und effizienten Energielösungen für Geschäftskunden deutlicher von Wettbewerbern abgrenzen. (E.ON GB 2010)

Insgesamt ermittelten wir im Segment Strom in Deutschland eine mittlere bis gute Kundenzufriedenheit. Von den meisten unserer großen Wettbewerber heben wir uns damit positiv ab. (RWE Unsere Verantwortung 2010)<sup>392</sup>

Die Konzeptattribute ‚Wettbewerberunterscheidung‘, ‚Wettbewerbervergleich‘ und ‚Wettbewerberabscheidung‘ werden demnach alle genutzt, um eine differente UNTERNEHMENSIDENTITÄT zu konstruieren. So werden WETTBEWERBER beobachtet, eingeschätzt und in Bezug zur eigenen Position im WETTBEWERB verortet:

Zu den Wettbewerbern zählen Air Berlin in Deutschland sowie in Europa neben Air France-KLM und British Airways auch No-Frills- Carrier, wie Ryanair und Easyjet. Im interkontinentalen Verkehr gehören amerikanische Fluggesellschaften, wie American Airlines und Delta Airlines, sowie die stark wachsenden Gesellschaften aus dem Nahen Osten und Asien zu den Hauptwettbewerbern. (Lufthansa GB 2010)

Informationen werden ebenfalls über WETTBEWERBER eingeholt und Erwartungen an diese formuliert (u.a. ›Respekt‹):

Um Informationen über Wettbewerber zu erhalten, bedient sich Daimler aller zulässigen Mittel, vermeidet jedoch jede Vorgehensweise, die illegal ist oder Haftungsansprüche zur Folge haben kann. (Daimler Verhaltensrichtlinien)

---

<sup>392</sup> Vgl. dazu auch: „Nur wenn wir innovativ bleiben, können wir uns von unseren Wettbewerbern absetzen. Deshalb investieren wir in unser anwendungstechnisches Know-how verstärkt auch in den aufstrebenden Märkten Asiens.“ (Linde GB 2010).



Wir respektieren unsere Wettbewerber, erwarten Respekt für uns und reagieren auf Marktbewegungen angemessen. (HeidelbergCement Corporate Mission)

Durch diese kommunikativen Maßnahmen werden sie als (*kein*) *Konkurrent* bewertet:

Unter den größten Wettbewerbern fand sich in den letzten zehn Jahren kein neuer Konkurrent. (Infineon GB 2010)

Die letzten aufgeführten Belege evozieren schließlich auch das Attribut ‚sportlich‘, was der Ausdruck *Wettbewerb* ohnehin impliziert. Durch den Einsatz der *Fair Play*-Metapher (*fair\* + Wettbewerb*) wird dieser Eindruck jedoch sprachlich noch verstärkt:

Diese Richtlinien betreffen beispielsweise die korrekte Abrechnung von Produkten und Dienstleistungen, faires Verhalten im Wettbewerb und den respektvollen, integren Umgang mit den Patienten. (FMC GB 2010)

Die SPORT-Metaphorik<sup>393</sup> findet auch Verwendung durch Ausdrücke wie *Nr.1*, *Spitze\**, *Gegner*, *Spieler*, *Player*, *überholen*, *abheben* und *sich messen*, die im Kontext von *Wettbewerb\** auftauchen:

Wir orientieren uns an der Dynamik unserer Märkte sowie an den Besten im Wettbewerb. Unsere Wettbewerber dauerhaft zu übertreffen und selbst Maßstab für die Spitzenposition zu sein sind unser Ziel und unser Anspruch. (Siemens GB 2010)

Auch an den Kapitalmärkten messen wir uns mit leistungsstarken internationalen Wettbewerbern, die sich durch ihre hohe Profitabilität auszeichnen. (Metro GB 2010)

Überdies nutzten Unternehmen auch die Eigenattribution von *sportlich\** und *Sport\**, um ihren Anspruch an eine hohe LEISTUNG im WETTBEWERB zu legitimieren:

Außerdem tritt das Unternehmen seit vielen Jahren als Partner des Sports auf. Das Sport-Engagement ist sowohl Bekenntnis zu Leistungsbereitschaft im Wettbewerb als auch ein Bekenntnis zur sozialen Verantwortung des Unternehmens. (Lufthansa GB 2010)

Das Kapitel zeigte somit, wie Unternehmen den Sachverhalt WETTBEWERB und die in ihm agierenden WETTBEWERBER als Differenzinstanzen zur Konstruktion ihrer eigenen UNTERNEHMENSIDENTITÄT gebrauchen, d.h. Unternehmen suchen in der Wettbewerbsstruktur eine noch unbesetzte Nische (>Wettbewerb als konkreter Ort)<, um in dieser IDENTITÄT gegenüber anderen auszuarbeiten (‚Wettbewerberunterscheidung‘, ‚Wettbewerbervergleich‘, ‚Wettbewerberabscheidung‘). Aus dieser Systemlogik ergibt sich, dass sich der Identitätsstatus jedoch immer nur relational<sup>394</sup> (im Vergleich zum WETTBEWERB und zu WETTBEWERBERN) und, aufgrund der Dynamik des WETTBEWERBS, prozessual konstituiert. Die vorgenommenen Bedeutungszuschreibungen können folglich als Interpretation von Beziehungen gelten, die den Unternehmen „temporäre Identitätsstabilisierung, Profilbildung und Nischenfindung“ (Mützel 2009, 232) ermöglichen.

---

<sup>393</sup> McCloskey (2009, 114) verweist ebenfalls auf den Einsatz der SPORT-Metaphorik in der WIRTSCHAFT.

<sup>394</sup> Diese Perspektive verweist auf die netzwerktheoretische Idee von Akteuren, die aufgrund der Muster von Beziehungen, ihre Position und Rollenstruktur relativ zu allen anderen Akteuren im Netzwerk definieren (vgl. Mützel 2009, 228). Aus der wirtschaftssoziologischen Perspektive (vgl. Mützel 2009, 225) sind es somit die Akteure, die den WETTBEWERB sowie den MARKT (= das System) konstruieren, denn sie beobachten sich untereinander und erhalten dadurch Handlungshinweise für ihre eigenen Aktionen.

### 1.2.12 EREIGNISSE

Identitätsstabilisierungen können durch EREIGNISSE von ‚außen‘ zur neuen Ausrichtung gebracht werden. Im Korpus fällt diesbezüglich die Thematisierung von EREIGNISSEN auf, denen das Unternehmen kontextuell begegnet und die als scheinbare „ontische Erschütterung“ dessen IDENTITÄT prägen. Es handelt sich dabei um FINANZ- UND WIRTSCHAFTSKRISE (→ dieser Anhang, 1.12.1), HERAUSFORDERUNG (→ dieser Anhang, 1.12.2), WANDEL (→ dieser Anhang, 1.12.3) und KONKRETISIERTE EREIGNISSE (→ dieser Anhang, 1.12.4), die in den folgenden Kapiteln behandelt werden.

#### 1.2.12.1 FINANZ- UND WIRTSCHAFTSKRISE

Im Diskurs wird auf die FINANZ- UND WIRTSCHAFTSKRISE referiert, die im Frühsommer 2007 mit der US-Immobilienkrise begann und sich weltweit in Verlusten und Insolvenzen in der Branche *Banking*, seit Ende 2008 aber auch in der Realwirtschaft offenbarte (vgl. Langenohl 2009, 256). Langenohl spricht daher von der „2007 erstmals registrierten und 2008 eindeutig festgestellten globalen Finanzkrise“ (Langenohl 2009, 256). Auf dieses EREIGNIS wird von den Unternehmen substantivisch durch die Lexeme *Wirtschafts-* oder *Finanzkrise* (\**krise*\*) besitzt 445 *Hits* in den Konkordanzen) Bezug genommen, was für die Textteile aus dem *Geschäftsbericht* aufgrund deren Abbildung des GESCHÄFTSJAHRES 2009/2010 zu erwarten war. Jedoch wird die FINANZ- UND WIRTSCHAFTSKRISE als so bedeutsam empfunden, dass sie sogar textuell im *Leitbild* oder *Porträt* reflektiert wird, obwohl in diesen Textsorten problembehaf-tete Sachverhalte sonst ausgespart werden (vgl. Stach/Held 2009, 5):

Unter dem Eindruck der Finanz- und Wirtschaftskrise verlor der Deutsche Aktienindex (dax) bis Anfang März rund 24 Prozent und markierte mit 3.666 Punkten den Jahrestiefststand. Dieses war zugleich der niedrigste Stand seit fünf Jahren. (Bayer Namen.Zahlen.Fakten 2010/2011)

Der sprachliche Verbund *Finanz- und Wirtschaftskrise* wird damit von BAYER zur Bezug-nahme auf ein bedeutsames EREIGNIS<sup>395</sup> (›Krisenereignis‹) für den gesamten DAX genutzt. Lexikalisch dienen den Unternehmen auch Ausdrücke wie *Krisenjahr* dazu, einen spezifi-schen ›Krisenzeitabschnitt‹ als KRISE festzusetzen:

Im Krisenjahr 2009 haben wir unsere führende Stellung im internationalen zeitkritischen Expressbereich mit einem Marktanteil von rund 37 % behauptet. (Deutsche Post GB 2010)

Das Wissen um diesen ›Krisenzeitabschnitt‹ (›Krisenjahr 2009‹) wird in den folgenden Bele-gen implizit vorausgesetzt (2010 [...] *weiteres schwieriges Jahr, Rückenwind der weltweiten wirtschaftlichen Erholung*):

---

<sup>395</sup> Vgl. dazu ausführlich Wengeler (2011), Kuck (2011) sowie Ziem (2012). Ziem (2012) untersucht das sogenannte „Krisenvokabular“: Unter Rang 1-25 finden sich u.a. (nach Rang absteigend) *haben, Banken, Euro, Finanzkrise, Milliarden, Bank, Kreise, war, Geld, ihre, Dollar, Unternehmen, sagt, nun, seit, Staat, vergan-gen, US, (Un-)Sicherheit*.

2010 war ein weiteres schwieriges Jahr für die Bauprodukte aufgrund ihrer hohen Abhängigkeit vom Wohnungsbau. (HeidelbergCement GB 2010)

2010 war ein sehr gutes Jahr für die MAN Gruppe. Den Rückenwind der weltweiten wirtschaftlichen Erholung haben wir genutzt, um unser Geschäft auszuweiten und unsere Internationalisierungsstrategie konsequent voranzutreiben. (MAN GB 2010)

Auf der syntagmatischen Ebene zeigt die temporale Angabe *in/während der \*krise* ebenfalls einen ›Krisenzeitraum‹ an, der als bekannt vorausgesetzt wird, was der bestimmte Artikel *der* suggeriert:

Flexibilität zählt zu unseren größten Stärken. In der Krise notwendig gewordene Veränderungen haben wir aktiv gestaltet – etwa durch Restrukturierungen im Kontinentalverkehr, wie zum Beispiel mit dem Projekt EUDIRecton, durch das die Stückkosten im dezentralen Verkehr reduziert werden. (Lufthansa GB 2010)

Der Vorstand dankt allen Mitarbeiterinnen und Mitarbeitern für ihre Unterstützung in der Krise und ihren Einsatz in der anschließenden Phase des Aufschwungs. (Daimler GB 2010)

In diesen KRISENZEITRAUM betten sich Unternehmen demgemäß spatio-temporal ein. Dass es sich bei ›Krisenzeitraum‹ um eine zentrale Epochenbeschreibung zu handeln scheint, welche identitätsbildend für die untersuchten Unternehmen ist, manifestiert sich durch verschiedene sprachliche Ausführungen, die auf das Konzept ›historische Zäsur durch die Krise‹ hindeuten:

Dieser wuchs um rund 30 % nach einem historischen Tiefstand im Jahr 2009. (HeidelbergCement GB 2010)

Nachdem die Weltwirtschaft 2009 die schwerste Rezession seit 1945 erlebt hatte, stand 2010 im Zeichen der konjunkturellen Erholung. (Telekom GB 2010)

Neben diesen evaluierenden Formulierungen (*historische[n] Tiefstand* oder *schwerste Rezession*) wird das Konzept ›historische Zäsur durch die Krise‹ durch die temporalen Angaben mittels Adverbien sowie Verben angezeigt, die eine *neue Phase [...] nach der Krise* andeuten:

Mit der Einführung eines neuen Leitbildes wurde bewusst eine neue Phase eingeleitet, um nach der Krise Orientierung zu geben und eine gemeinsame neue Identität schaffen. (Infineon GB 2010)<sup>396</sup>

Dieses Konzept transportieren auch Wortbildungsmorpheme und Präpositionen (*vor\**, *nach*):

Das Vorkrisenniveau wurde jedoch noch nicht erreicht. (VW GB 2010)

Wir waren auch in den wirtschaftlich schwierigen Zeiten nach der Krise noch zufriedenstellend profitabel. (Deutsche Börse GB 2010)<sup>397</sup>

Ebenfalls das Tempus zeigt Vor- und Nachzeitigkeit in Bezug auf das Konzept ›historische Zäsur durch die Krise‹ an:

Der asiatischpazifische Raum, der deutlich weniger unter der Krise gelitten hatte, hat seine Vormachtstellung im internationalen Handel weiter ausgebaut. (Deutsche Post GB 2010)

---

<sup>396</sup> Vgl. dazu auch: „Seit dem Ausbruch der Finanzkrise im Jahr 2008 ticken die Uhren an den Finanzmärkten weltweit anders. [...] Banken und Börsen sind mit einer veränderten Kapitalmarktlanschaft konfrontiert.“ (Deutsche Börse GB 2010); „Damit [mit der Krise, S.B.] einher gehen neue Leitwerte für die Finanzmärkte: Sicherheit und Integrität sind inzwischen ebenso wichtig wie Effizienz.“ (Deutsche Börse GB 2010).

<sup>397</sup> Vgl. dazu auch: „Nach der Wirtschaftskrise, die ihren Höhepunkt im Jahr 2009 erreicht hatte, haben sich die gesamtwirtschaftlichen Bedingungen wieder deutlich verbessert, die Nachfrage nach Logistikleistungen ist gestiegen und damit der Umsatz im Berichtsjahr, was im kommenden Jahr einen positiven Trend erwarten lässt.“ (Deutsche Post GB 2010).

Durch die Verwendung des Plusquamperfekts als Vorvergangenheit wird die FINANZ- UND WIRTSCHAFTSKRISE als weit in der Vergangenheit zurückliegend („historisch“) perspektiviert. Das Tempus validiert damit die These der Zäsurhaftigkeit nach der temporalen Struktur VOR-KRISE – FINANZ- UND WIRTSCHAFTSKRISE – NACH-KRISE. Daher könnte man hierbei auch von einem Versuch der Sachverhaltsfestsetzung sprechen, der durch Dominantsetzung der Konzeptstruktur ›alte Zeit X – einschneidendes Ereignis – neue Zeit Y‹<sup>398</sup> entsteht. Das EREIGNIS (FINANZ- UND WIRTSCHAFTSKRISE) wird dabei assertiv als nur bedingt vergleichbar bis hin zur Singularität seines Dagewesenseins konstituiert (vgl. Felder 2009a, 39). Des Weiteren finden sich beim Sachverhalt FINANZ- UND WIRTSCHAFTSKRISE jedoch auch Aussagen von Unternehmen, die diesen Sachverhalt als positives EREIGNIS konstituieren, um ihre ›Krisenperformance‹ darzustellen, was bereits unter den kausal gegenläufigen Konzepten (→ 6.4.4) behandelt wurde:

Der Internethandel ist seit Jahren einer seiner zentralen Wachstumstreiber. Weder die Finanz- und Wirtschaftskrise noch die Insolvenz des Versandhauses Quelle konnten das Wachstum in der für Paketdienste wichtigen Kundengruppe Versandhandel bremsen. (Deutsche Post GB 2010)

Diese Konzeptualisierung wird auch durch das Syntagma *aus der Krise* erreicht, das eine ›Krisenüberwindung‹ durch das Unternehmen nahelegt („Krisenüberwindung“)

Erfolgreich aus der Krise fahren. Alle Signale deuten darauf hin, dass die gesamtwirtschaftliche Krise überwunden ist. (MAN GB 2010)

MUNICH RE spricht diesbezüglich von *Krise* [...] *gemeistert* („Krisenmeisterung“):

Munich Re hat die Krise mit relativ geringen Einbußen und weiterhin hoher Finanzkraft gemeistert. (Munich Re Über Munich Re)

Folgende Aussagen evozieren außerdem das Konzeptattribut ‚Krisengewinn‘ (gepaart mit *aus der Krise*):

MAN ist gestärkt aus der Krise hervorgegangen. Für 2010 legen wir eine Erfolgsbilanz vor und setzen damit ein Zeichen für unsere Kompetenz und Wettbewerbsstärke. (MAN GB 2010)

Den durch die Finanz- und Wirtschaftskrise im Geschäftsjahr 2009 bedingten Umsatz- und Ergebnismrückgang haben wir im Berichtsjahr mehr als ausgleichen können. (Henkel GB 2010)

Die FINANZ- UND WIRTSCHAFTSKRISE ist damit als EREIGNIS ein ‚Zugewinn‘ hin zum AUFSCHWUNG. Dieser ‚Zugewinn‘ wird in weiteren Aussagen bereits *in der Krise* veranlagt:

Denn Daimler hat in der Krise die Voraussetzungen für künftige Erfolge geschaffen – strategisch, technologisch und natürlich produktseitig. (Daimler Unternehmensinformationen 2010)<sup>399</sup>

So werden auch die FOLGEN der KRISE (›Krisenfolgen‹) bei VW, E.ON und DEUTSCHE Post ‚positiv‘ perspektiviert, was die Kookkurrenzen von \**krise* mit Verben wie *erholen* oder *bewältigen* nahelegen:

---

<sup>398</sup> Vgl. dazu auch Tereick (2008), welche die Konzeptualisierung des EREIGNISSES 9/11 anhand der Konzepte ›historischer Einschnitt‹ und ›Zäsur‹ herausarbeitet.

<sup>399</sup> Vgl. dazu auch: „Der Hafen boomt wieder“, freut sich Külß. [...] das Umschlagtempo am Schiff nahm sogar in der Krise weiter zu [...].“ (MAN GB 2010).

Das Nutzfahrzeugsegment erholte sich im abgelaufenen Geschäftsjahr spürbar von den Auswirkungen der Finanz- und Wirtschaftskrise. (VW GB 2010)

Durch aktives Risikomanagement der Hersteller und des Handels sowie enge Zusammenarbeit mit Finanzdienstleistern ließen sich die Auswirkungen der Weltwirtschaftskrise gut bewältigen. (VW GB 2010)

Wie die Belege zeigen, scheint das Syntagma *Auswirkungen der \*krise* dabei gebräuchlich.

›Krisenfolgen‹, die ‚negativ‘ sind, werden dagegen nur von E.ON expliziert:

Allerdings bleiben die Folgen der Finanz- und Wirtschaftskrise in den kommenden Jahren deutlich spürbar. Besonders der Preisverfall bei Strom und Gas macht sich längerfristig bemerkbar und sorgt für ein schwieriges Marktumfeld. (E.ON Cleaner and better energy)

Gleichzeitig liegen die Auswirkungen der Weltwirtschaftskrise noch nicht hinter uns. (E.ON Cleaner and better energy)

Das Konzept ›Krisenfolgen‹ wird dabei jedoch vielmehr als Rechtfertigungsmittel von E.ON genutzt, um negative FOLGEN (z.B. *Wertberichtigungen, schmalere Margen*) zu entschuldigen:

Insbesondere in Südeuropa haben die negativen Auswirkungen der Finanz- und Wirtschaftskrise in Form von Überkapazitäten, niedrigen Strompreisen und stark verringerten Margen in der Erzeugung angehalten. Hier mussten wir 2010 auf diese Geschäfte Wertberichtigungen in Höhe von insgesamt rund 2,6 Mrd € vornehmen. Auch in unserem deutschen Heimatmarkt prägen harte Konkurrenz im Vertrieb, geringere Erlöse im regulierten Netzbetrieb und schmalere Margen in der Erzeugung unser Geschäft. (E.ON Cleaner and better energy)

Bei der Analyse der Satz- und Textebene fällt daneben auf, dass der Sachverhalt FINANZ- UND WIRTSCHAFTSKRISE wiederholt als ÜBEL/KRANKHEIT konstruiert wird (›Krise als Übel‹):

Osteuropa-Zentralasien wurde als letztes Konzerngebiet von der Wirtschaftskrise erfasst und ist nun das letzte Gebiet, das sich davon erholt. (HeidelbergCement GB 2010)<sup>400</sup>

In diesen Belegen sind UNTERNEHMEN der KRISE hilflos ausgeliefert und werden zu reaktiven Entitäten. In anderen Belegen dagegen wird die KRISE als ‚weniger handlungsrestriktiv‘ gezeichnet, bei der die Handlungsfähigkeit von Unternehmen bestehen bleibt (*bremsen, trotzten*):

Unsere nordeuropäischen Werke in Estland und Schweden trotzten mit einer deutlichen Steigerung ihres Zementabsatzes im Inland der Krise am besten. (HeidelbergCement GB 2010)

Diese Handlungsfähigkeit kommt zuletzt auch durch das Konzept ›Krisenverhütung‹ zum Ausdruck:

2010 hat Fresenius Medical Care North America für sein Krisenmanagementsystem und seine gute Zusammenarbeit mit externen Kriseneinrichtungen eine Auszeichnung vom US-amerikanischen Zweig der International Association of Emergency Managers (IAEM) erhalten. (FMC GB 2010)

Infolgedessen lässt sich beim Sachverhalt FINANZ- UND WIRTSCHAFTSKRISE von einer Sachverhaltsfixierung sprechen (vgl. Felder 2010, 556), da dieser durch kollektive sprachliche

---

<sup>400</sup> Vgl. dazu auch: „Die Krise hat einige unserer Kunden wirtschaftlich geschwächt. Mit dem konjunkturellen Aufschwung sinkt die Wahrscheinlichkeit von Kundeninsolvenzen wieder auf ein normales niedriges Niveau, sodass wir keine neuen nennenswerten Verluste durch Zahlungsunfähigkeit von Kunden erwarten.“ (Deutsche Post GB 2010).

Zuschreibungsakte von Unternehmen festgesetzt wird.<sup>401</sup> Vor allem die Konzepte ›historische Zäsur durch die Krise‹ und ›Krisenperformance‹ scheinen dabei zentral und heben das anschließende Unternehmenshandeln positiv hervor. Die Unternehmen sorgen zugleich dafür, dass ein (erhöhtes) Krisenbewusstsein – auch durch den verstärkten Wortgebrauch von *\*krise\** – an ihre Anspruchsgruppen herangetragen wird, was offenbar wichtig für deren UNTERNEHMENSIDENTITÄT in temporaler Hinsicht (›Krisenzeitraum‹) und für Rechtfertigungshandlungen (›Krisenfolgen‹) im untersuchten Zeitabschnitt ist.

### 1.2.12.2 HERAUSFORDERUNGEN

Analog zur FINANZ- UND WIRTSCHAFTSKRISE finden sich HERAUSFORDERUNGEN als konstituiertes EREIGNIS im Diskurs. Neben der lexikalischen Häufung von *Herausforderung\** (378x) im Korpus, wird das Lexem ausdrucksseitig besonders markant von K+S und der COMMERZBANK gebraucht, u.a. auf der Überschriftenebene:

Herausforderungen annehmen, Ziele erreichen. (Commerzbank GB 2010)

*Herausforderung\** wird meist im Plural *Herausforderungen* verwendet. Auf der Lexemebene sind sonst keine weiteren Auffälligkeiten zu verzeichnen. Vielmehr wird der Ausdruck in Syntagmen genutzt, indem der Plural *Herausforderungen* durch Adjektive attribuiert wird und demzufolge eine ›Herausforderungsart‹ anzeigt: Meist sind HERAUSFORDERUNGEN dabei in ihrer ‚Wertigkeit‘ hierarchisiert (*wesentliche\**, *zentrale\**, *besondere\**):

Prägende Rahmenbedingungen wie der Klimawandel, der technologische Fortschritt, die globalisierten Finanzmärkte sowie der demografische Wandel stellen wesentliche Herausforderungen dar. (Munich Re GB 2010)

Auch Dimensionsadjektive (*gewaltige\**, *große\**) dienen der Bewertung von HERAUSFORDERUNGEN, wobei alle die enorme Beträchtlichkeit dieser herausstellen (‚enorm‘):

Die Gestaltung der zukünftigen Energieversorgung ist eine große Herausforderung, die wir annehmen: Bis 2050 soll die Stromversorgung in Europa CO<sub>2</sub>-neutral sein. (RWE Unsere Verantwortung 2010)

Viele Unternehmen verwenden dabei die verfestigte Verbindung *große\* Herausforderungen*, ohne die referierten HERAUSFORDERUNGEN weiter zu spezifizieren:

Die Welt steht vor großen Herausforderungen. (Siemens GB 2010)

Als weitere ›Herausforderungsart‹ gilt ‚temporal‘ (*zukünftige\**, *neu\**):

Wir denken langfristig und haben zukünftige Herausforderungen schon heute im Auge. Wir arbeiten engagiert an der Verwirklichung unserer Vision und unserer Mission. (E.ON Unser Verhalten)

In den Aussagen zeigt sich dabei ein starker Fokus auf in der ZUKUNFT liegende HERAUSFOR-

---

<sup>401</sup> Diese Sachverhaltsfixierung entsteht, da „kein Individuum in der Lage ist, einen Wirtschaftsaufschwung oder -abschwung empirisch mit seinen originären Sinnen wahrzunehmen.“ (Felder 2010, 556) Der Zustand als ›Krise‹ wird kollektiv als prototypisch für die Phase des Abschwungs als eine *Krise* akzeptiert. Diese Generalisierung und Aufblähung von FINANZ- UND WIRTSCHAFTSKRISE führt jedoch nach Langenohl durch die „Rhetorik der globalen Krise“ (Langenohl 2009, 260) zu Dysfunktionalität, „dann nämlich, wenn sie die Marktteilnehmer in ihren undifferenzierten Erwartungen bestätigt oder gar bestärkt“ (Langenohl 2009, 260).



DERUNGEN. Dies bestätigt sich auch in der Durchsicht der Syntagmen durch das Genitivattribut *Herausforderungen der Zukunft*:

Die Herausforderungen der Zukunft verlangen jedoch nach mehr, als neue Technologien zu erfinden. Wir antworten darauf mit unserer Vision: vorausdenken, um Neuland zu betreten. Im Fokus steht die Art und Weise industrieller Wertschöpfung. (Siemens GB 2010)

Im Beleg von SIEMENS wird *Herausforderungen* durch das Verb *verlangen* agentisiert, was bedeutet, dass SIEMENS *antworten* muss (*Produktivität [...] steigern*). SIEMENS bezieht sich darüber auch auf die GEGENWART (*Herausforderungen unserer Zeit*):

In unserem Geschäftsbericht möchten wir Ihnen anhand von drei ausgewählten Reportagen näherbringen, wie wir als Pionier den Herausforderungen unserer Zeit begegnen. (Siemens GB 2010)

Die HERAUSFORDERUNGEN werden nicht nur narrativ in *Reportagen* im *Geschäftsbericht 2010* ausgeführt, sondern ebenso in die *Vision* von SIEMENS integriert, d.h. sie werden zum integralen Bestandteil der antizipierten UNTERNEHMENSIDENTITÄT:

Siemens stellt sich den Herausforderungen unserer Zeit – heute genauso wie vor über 160 Jahren, als Werner von Siemens das Unternehmen gründete. (Siemens Vision)

Als weitere Spezifizierungen von ›Herausforderungsart‹ zeigen sich ‚mikroökonomisch‘ (*betriebliche\*/unternehmerische\* Herausforderungen*<sup>402</sup>), ‚ökologisch‘, ‚technologisch‘ sowie ‚sozial‘:

K+S nimmt den Klimaschutz als ökologische und ökonomische Herausforderung sehr ernst. Wissenschaft, Politik und Gesellschaft sind gefordert, die vorhandenen Ressourcen effizienter zu nutzen und den weiteren Anstieg von Treibhausgasen zu bremsen. (K+S GB 2010)

Gleichzeitig hat die MAN Gruppe ständig ihre unternehmerische Kompetenz global ausgebaut. Nur so konnte und wird sie weiterhin die wirtschaftlichen, technologischen und sozialen Herausforderungen erfolgreich bewältigen. (MAN Unternehmensleitbild)

Am häufigsten wird jedoch die ›Herausforderungsart‹ ‚global‘ durch die Kollokation *globale\* Herausforderungen* aufgerufen:

Globale Herausforderungen wie der Klimawandel, der steigende Energiebedarf oder die demografische Entwicklung erfordern Lösungen – auch von international tätigen Unternehmen. (Linde GB 2010)

Aus den Belegen geht hervor, dass als ‚globale‘ HERAUSFORDERUNGEN vor allem KLIMAWANDEL, DEMOGRAPHISCHER WANDEL und RESSOURCENKNAPPHEIT gesehen werden (→ dieser Anhang, 1.12.4).<sup>403</sup> Außerdem zeigen die Aussagen an, dass die Unternehmen sich selbst als ›Herausforderungsadressaten‹ (‚Unternehmen‘) inszenieren. Diese Konzeptualisierung manifestiert sich noch deutlicher durch die Verbindung des Personalpronomens *uns* + (*vor*) *Herausforderungen stellen*:

All diese Faktoren der technischen Weiterentwicklung stellen uns vor Herausforderungen, aber sie bieten auch neue Chancen. Wir wollen so beispielsweise die Auswirkungen auf unsere Umwelt signifikant verrin-

---

<sup>402</sup> Vgl. dazu: „Zum einen optimieren wir bestehende Anlagen und Verfahren, um betrieblichen Herausforderungen mit innovativen Lösungen zu begegnen und unsere Anlagen während ihrer gesamten Lebensdauer effizient und wirtschaftlich zu betreiben.“ (E.ON GB 2010).

<sup>403</sup> Diese Sachverhalte werden teilweise direkt in Genitivattributen angeschlossen: „Auch in Zukunft gilt es, den Herausforderungen der Globalisierung und dem technologischen Wandel zu begegnen.“ (MAN GB 2010).

gern und gleichzeitig bessere Leistungen für unsere Kunden bieten. (E.ON Cleaner and better energy)

Das Funktionsverbgefüge *vor Herausforderungen stellen* trägt auf der Satzebene zu einer statischen Modellierung des Sachverhalts HERAUSFORDERUNGEN bei, da nur eine Anerkennung der HERAUSFORDERUNGEN durch den ›Verantwortungsadressaten‹ (E.ON in diesem Fall) ausgedrückt wird; in Variation dazu findet sich diese Konzeptualisierung durch das Funktionsverbgefüge *vor Herausforderungen stehen*:

Als international agierendes Handelsunternehmen mit Aktivitäten in 33 Ländern steht die METRO GROUP vor einer Vielzahl an Herausforderungen. Vor allem in den reifen Märkten Westeuropas hat sich das Bruttoinlandsprodukt in den vergangenen Jahren schwach entwickelt – mit der Folge, dass unter anderem die Höhe der verfügbaren Einkommen stagnierte. (Metro GB 2010)

Im Gegensatz zu dem in der Aussage von METRO zugrunde gelegten Konzeptattribut ›Herausforderungshandlung‹ ‚passive Anerkennung der Herausforderung‘ zeigt sich das Attribut ‚aktive Auseinandersetzung mit der Herausforderung‘ dagegen durch das Muster *Herausforderung\* annehmen/gerecht werden*, das besonders bei RWE auftaucht, jedoch nicht ein aktives Handeln durch das Unternehmen indiziert:

Die unternehmerischen Herausforderungen für RWE sind größer denn je. Um ihnen gerecht zu werden, brauchen wir Mitarbeiter mit Ideen und Initiative. Talente innerhalb und außerhalb des Konzerns zu finden, sie zu entwickeln und langfristig an das Unternehmen zu binden, sind wichtige Eckpfeiler unserer Personalstrategie. (RWE GB 2010)

Das Attribut ‚aktive Auseinandersetzung mit der Herausforderung‘ wird zudem in der folgenden Aussage mit dem Eigennamen *RWE* gekoppelt (*heisst*) und damit metasprachlich in die UNTERNEHMENSIDENTITÄT von RWE integriert:

VoRWEg gehen heisst Herausforderungen annehmen. (RWE Unsere Verantwortung 2010)

Schließlich zeigen sich Formulierungen, die ein ‚aktives Handeln in der Herausforderungssituation‘ beschreiben (mit den Verben *begegnen*, *reagieren* und *stellen*):

In einem sich stetig wandelnden Umfeld entwickeln wir unser Unternehmen kontinuierlich weiter, um den globalen Herausforderungen auch zukünftig mit innovativen Lösungen begegnen zu können. (ThyssenKrupp GB 2010)

Hierbei fällt die finale Satzstruktur auf, wodurch BEDINGUNGEN aufgestellt werden (WEITERENTWICKLUNG), durch welche auf HERAUSFORDERUNGEN eingegangen werden kann. Es werden jedoch insgesamt nur wenige konkrete MASSNAHMEN diesbezüglich genannt<sup>404</sup>, sondern hauptsächlich konstatiert, dass es solche gibt und diese *früh\** getroffen werden müssen bzw. getroffen wurden:

Auf den demographischen Wandel – eine Herausforderung in vielen Industrienationen – reagiert Bayer mit

---

<sup>404</sup> Vgl. dagegen: „Der Wettbewerb wird intensiver, die Ansprüche unserer Kunden an Service und Produktvielfalt steigen; regulatorische Eingriffe verändern bestehende Geschäftsmodelle [...]. Wir stellen uns diesen Herausforderungen, indem wir innovative Produkte und Dienstleistungen entwickeln und weiterhin in eine zukunftsfähige, umweltfreundliche Energieversorgung investieren.“ (RWE GB 2010); „Das Gas ist selten, die Nachfrage steigt, die Versorgungssicherheit muss dennoch gewährleistet sein – dieser Herausforderung stellt sich Linde im Markt für Helium und erweitert seine Bezugsquellen.“ (Linde GB 2010).

einer Vielzahl von Maßnahmen. (Bayer Namen.Zahlen.Fakten 2011/2012)

Wesentlicher Bestandteil unserer Strategie ist es, auf Chancen und Herausforderungen frühzeitig zu reagieren, die sich aus den Megatrends Bevölkerungswachstum, veränderte Ernährungsgewohnheiten und steigende Nachfrage nach Agrarrohstoffen ergeben. (K+S GB 2010)

Durch weitere regelhaft realisierte Konstruktionen im Korpus (*den Herausforderungen stellen* oder *Herausforderungen bekämpfen*) wird das offensive Gegenübertreten des Unternehmens noch stärker herausgestellt und die HERAUSFORDERUNGEN als GEGNER präsentiert, was beim Rezipienten Konzepte wie ›Herausforderungshandlung‹ ‚Herausforderungsbeseitigung‘ evoziert:

Die von Daimler mitbegründete Laureus Sport for Good Foundation nutzt die Kraft des Sports, um die sozialen Herausforderungen unserer Zeit zu bekämpfen. (Daimler GB 2010)

Verben wie *bewältigen* oder *meistern*, die ebenfalls häufig in Verbindung mit *Herausforderungen* auftreten, implizieren darüber hinaus auch die ‚Herausforderungsbewältigung‘. Dennoch zeigt die Häufung von Finalsätzen und Infinitivkonstruktionen beim Konzeptattribut ‚Herausforderungsbewältigung‘ an, dass es sich nur um eine ›Absicht‹ handelt, die Unternehmen ausdrücken. ‚Herausforderungsbewältigung‘ wird darüber hinaus auch durch Syntagmen der Form *X der Herausforderungen* angedeutet, die zahlreich vom selben Wortstamm wie die Verben gebildet werden, z.B. *Bewältigung der globalen Herausforderungen*:

Mit innovativen Technologien und hochwertigen Materialien leistet Bayer einen nachhaltigen Beitrag zur Bewältigung der globalen Herausforderungen [...]. (Bayer Namen.Zahlen.Fakten 2011/2012)

Die Konstruktionen *Lösung\* der (x) Herausforderungen* sowie *Antworten auf (x) Herausforderungen* zeichnen dagegen jedoch, im Sinne der *Need-Solution*-Struktur (→ 8.4.2.1), deutlicher einen positiven Ausgang:

Wir nutzen unsere wissenschaftliche Kompetenz und entwickeln Innovationen, um zur Lösung der großen Herausforderungen unserer Zeit beizutragen. (Bayer Mission und Werte)

Wir haben Antworten auf die Herausforderungen, denen wir gegenüberstehen. Unser Ziel ist, Energie immer sauberer und immer besser zu machen. (E.ON Cleaner and better energy)

SIEMENS bindet diese Aussagen fast prophetisch (*das macht uns zu dem Unternehmen, das Antworten hat*) an sich zurück:

Siemens ist der ideale Arbeitgeber für Menschen, die den Mut haben, Fragen zu stellen. Denn das macht uns zu dem Unternehmen, das Antworten hat – auf die Herausforderungen von heute und von morgen. (Siemens GB 2010)

Es geht bei SIEMENS aber nur um die Tatsache des theoretischen Vorhandenseins von ANTWORTEN (theoretisches Möglichkeitspostulat), nicht um deren praktische Existenz oder Umsetzung. *Herausforderungen* wird durch eine solche Aussage jedoch von der Konnotation ‚Problemhaftigkeit‘ losgelöst und kann unter positiver Konnotation der UNTERNEHMENSIDENTITÄT angehaftet werden, um wiederum MENSCHEN (*Menschen, die den Mut haben, Fragen zu stellen*) an SIEMENS zu binden.

### 1.2.12.3 WANDEL

Ebenfalls der Sachverhalt WANDEL wird als markantes EREIGNIS im Korpus konstituiert, was in der Lexik durch diverse Komposita mit *\*wandel* auffällt. Letztere evozieren eine ›Wandelart‹, z.B. *Klimawandel* oder *Technologiewandel* (s.u.). Auch durch Adjektivattribute wird ›Wandelart‹ in der Form *x Wandel* aufgerufen (*technologisch*<sup>405</sup>, *demografisch*<sup>406</sup> + *Wandel* etc.). Oft werden Adjektive auch sequentiell gereiht und akkumulieren verschiedene Ausdrücke unter ›Wandelart‹:

Der demografische und gesellschaftspolitische Wandel in Europa und Nordamerika stellt eine besondere Herausforderung dar. (K+S GB 2010)

Das Attribut ‚permanent‘ als ›Wandelart‹ findet durch das Adjektiv *(be)ständig*\* Ausdruck:

Das immer stärker vernetzte und digitalisierte Geschäftsumfeld ist von einem ständigen Wandel geprägt. (SAP GB 2010)

Auch innerhalb weiterer Syntagmen wird dieses Attribut rekurrent aufgenommen, was sich besonders durch die temporal genutzte Angabe *im Wandel* zeigt:

Die Welt ist im Wandel. (K+S GB 2010)

WANDEL wird in dieser Aussage als ›Wandelzeitraum‹ objektiviert, was sich bereits ähnlich beim Sachverhalt FINANZ- UND WIRTSCHAFTSKRISE (→ dieser Anhang, 1.12.1) offenbarte. In Kookkurrenz mit *in/im Wandel* befinden sich – neben dem Verb *sein* – weitere statische Verben wie *befinden*, *stehen* oder *unterliegen*, die damit Funktionsverbgefüge bilden und Unternehmen statisch in diesen WANDELZEITRAUM verorten:<sup>407</sup>

Die Metro Group befindet sich im Wandel. Mit einer Vielzahl von Maßnahmen ist es uns gelungen, unsere Umsätze zu steigern. (Metro GB 2010)

Die Automobilindustrie steht mitten in einem rasanten Strukturwandel. Eine klare Strategie, effiziente Strukturen und zielgerichtete Partnerschaften sorgen für Orientierung. (VW GB 2010)

Weitere musterhafte Belege auf der Satzebene liefert daneben die Konstruktion *Wandel + (mit-)gestalten*:

Den Wandel der METRO GROUP aktiv gestalten – das wird auch in Zukunft unsere vorrangige Aufgabe bleiben. (Metro GB 2010)

*Gestalten* trägt dabei nicht nur eine positive Konnotation, sondern perspektiviert den WANDEL als eine vom Unternehmen mitgeformte ›Wandelhandlung‹ der ‚Wandelgestaltung‘. Den aktivistischen Aspekt unterstreicht METRO nochmals durch das Adverb *aktiv*. Das Unternehmen ist somit nicht mehr statisches (*im Wandel*), sondern aktives Gebilde (*Wandel gestalten*). Die

---

<sup>405</sup> Vgl. dazu: „[...] angesichts des beschleunigten technologischen Wandels und aktueller Herausforderungen wie Klimawandel und Umweltschutz stehen wir vor der Aufgabe, das Auto neu zu erfinden.“ (Daimler GB 2010).

<sup>406</sup> Vgl. dazu: „Klimawandel und Globalisierung, eine dynamisch fortschreitende Verstädterung, der demografische Wandel und seine Auswirkungen – all das prägt die Lebenswelt des Menschen und sein wirtschaftliches Umfeld.“ (Siemens GB 2010).

<sup>407</sup> Wenige Beispiele finden sich dagegen für das Vorgangsverb *sich wandeln*. Vgl. dazu: „Das Geschäftsumfeld von Munich Re wandelt sich ständig und bietet laufend neue Chancen und Risiken.“ (Munich Re GB 2010).

beiden folgenden Belege weiten diese Semantik aus, indem MAN diese aktivische Rolle aus seiner GESCHICHTE kausallogisch ableitet:

Die zentralen Werte der MAN Gruppe zuverlässig, innovativ, dynamisch und offen sind für uns verbindlich – unabhängig vom technologischen und wirtschaftlichen, politischen und gesellschaftlichen Wandel, den MAN schon seit über 250 Jahre erfolgreich mitgestaltet. (MAN Unternehmensleitbild)

MERCK konzeptualisiert sich darüber als ›Wandelinitiator‹ (*initiieren und gestalten*) und hebt sich von anderen (*viele erfolgreiche Unternehmen*), denen das Attribut ‚Wandelgestaltung‘ zugeschrieben wird, positiv ab:

VIELE ERFOLGREICHE UNTERNEHMEN BEGLEITEN DEN WANDEL IN GESELLSCHAFT, FORSCHUNG UND TECHNIK. WIR INITIIEREN UND GESTALTEN IHN. (Merck Einzigartig – Der Merck Weg)

Als Synonym für *Wandel* taucht im Korpus auch das Lexem *Veränderungen* auf, das beispielsweise bei DEUTSCHE BANK in den Text *Leitbild und Werte* integriert wird:

Die Veränderungen, die die Globalisierung mit sich bringt, gehen wir offensiv an. (Deutsche Bank Leitbild und Werte)

Ebenfalls das Partizip *verändert*\* evoziert ›veränderte Rahmenbedingungen‹:

Zunehmend veränderte Bedarfstrends in der Erst- und Rückversicherung, immer komplexere Risikoszenarien und neu auftkommende Risiken verändern die Aufgaben des Rückversicherers. (Munich Re Strategie)

So wurden im Jahr 2009 allein in Deutschland mehr als 60 Millionen Euro investiert, um die beruflichen Fähigkeiten der Mitarbeiter zu erweitern und an veränderte Anforderungen anzupassen. (Bayer Namen. Zahlen.Fakten 2010/2011)

Das reflexive Verb *sich verändern* findet sich in Kookkurrenz mit *Welt*, wodurch ein Anspruch auf Generalisierung in den Aussagen einhergeht:

Die Welt verändert sich und mit ihr die Gesellschaften, in denen wir als Unternehmen weltweit tätig sind. (Siemens GB 2010)<sup>408</sup>

Ein Kovorkommen mit *Welt* lässt sich für *Wandel* und *Herausforderungen* beobachten. Mit hoher epistemischer Sicherheit (Futur) hinsichtlich des (weiteren) Bestehens von WANDEL werden dabei Aussagen in Bezug auf die WELT getroffen:

Der Wandel, den wir derzeit erleben, wird anhalten und unsere Welt langfristig prägen. (Siemens Vision)

SIEMENS konzeptualisiert sich durch solche Aussagen als machtvoll INSTITUTION, die Kontrolle bzw. Gewissheit über den WANDEL hat (und daher Sicherheit gewährt). In dieser Bedeutung ist auch das Konzept ›Wandel als Chance‹ zu verstehen, das lexikalisch verschieden aufgerufen wird:

Wir nutzen den Wandel als Chance. (BASF Vision.Gundwerte.Leitlinien)

Mit SAP wird jede Veränderung zur Chance, noch mehr zu erreichen. (SAP GB 2010)<sup>409</sup>

---

<sup>408</sup> Vgl. dazu auch: „Die Bereitschaft, lebenslang zu lernen, ist in unserer sich schnell ändernden Welt eine Grundvoraussetzung.“ (Daimler Das Unternehmen 2011).

<sup>409</sup> Vgl. dazu auch: „Um dauerhaft erfolgreich zu sein, müssen wir uns schnell und flexibel an neue Anforderungen anpassen. Veränderung verstehen wir daher als Chance und Veränderungsfähigkeit als Voraussetzung, diese Chance zu nutzen.“ (BMW GB 2010).

Durch dieses verbale *Reframing* (vgl. Reins 2006, 124f.) wird eine negative Konnotation von *Wandel* bzw. *Veränderung* komplett aufgelöst (>Wandel/Veränderung ist Verschlechterung und Bedrohung<), indem *Wandel* bzw. *Veränderung* als *Chance* umetikettiert wird (>Wandel/Veränderung ist eine Gewinnaussicht<): Durch dieses lexikalische Umetikettieren wird der Inhaltsrahmen, in dem *Wandel* bzw. *Veränderung* betrachtet und interpretiert wird, in einen positiven Rahmen gehoben. *Chance* kann infolgedessen als Euphemismus für ein negatives EREIGNIS eine positive Konzeptualisierung und Beurteilung bei Anspruchsgruppen erzeugen. In Verbindung mit dieser Euphemisierung fällt im Korpus zuletzt auch die Bezeichnung *\*trend* auf.

Mit unserer Strategie orientieren wir uns an den globalen Megatrends und den damit verbundenen Herausforderungen, zu denen wir Beiträge leisten können: Gesundheitsversorgung, Ernährungssicherheit sowie Ressourceneffizienz und Klimaschutz. (Bayer Namen.Zahlen.Fakten 2010/2011)

Diese Bezeichnung dient nicht nur wiederholt einem verbalen positiven *Reframing* mittels des Euphemismus (*Mega-*)*Trend* (als ‚Mode‘/‚Kult‘), sondern auch der Verknüpfung mit einer ökonomisch orientierten Lesart (s.u.). Das Präfix *mega\** kennzeichnet dabei in Bildungen mit Substantiven „jemanden oder etwas als besonders groß, mächtig, hervorragend, bedeutend (als Steigerung von *Super-*)“ (Duden 2001, 1064) und wirkt emotional verstärkend. Im Beleg von BAYER wird *Megatrends* durch das Adjektiv *global\** in Bezug auf die räumliche Extension in seiner Semantik noch hervorgehoben. Auch K+S sowie SIEMENS nutzen den Ausdruck *Megatrends* häufig:

Siemens liefert der Welt Lösungen für die Herausforderungen der Megatrends demografischer Wandel, Urbanisierung, Klimawandel und Globalisierung. Die Potenziale dieser Megatrends an traditionellen und neuen Märkten zu erschließen – dazu haben wir unser Portfolio in drei Sektoren organisiert: Industry, Energy und Healthcare. (Siemens GB 2010)

MEGATRENDS erscheinen hier als von SIEMENS eindringlich analysierte und v.a. kalkulierte Phänomene, wobei *Trend* auch eine „über einen gewissen Zeitraum bereits zu beobachtende, statistisch erfassbare Entwicklung[stendenz]“ (Duden 2001, 1600) darstellt. Diese ökonomische Lesart wird durch Wörter aus dem Wortfeld >Ökonomie< (*profitabel*, *wachsen*, *Geschäft*, *leisten*, *Portfolio*) im Kontext von *Megatrends* miteingegeben. Der Aspekt der ‚Kalkulation‘ erscheint bei K+S besonders ausgeprägt durch die graphische Darstellung der MEGATRENDS:

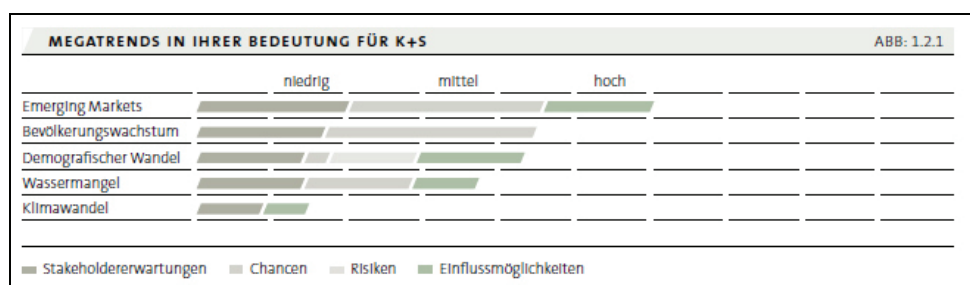

Abbildung 107 - K+S GB 2010



K+S zeigt durch diese Darstellung die ‚Steuerbarkeit‘ der MEGATRENDS an: Durch den Parameter *Einflussmöglichkeiten* wird dies u.a. suggeriert, indem MEGATRENDS (*Megatrends in ihrer Bedeutung für K+S*) durch *niedrig*, *mittel* oder *hoch* eingestuft werden.<sup>410</sup> Die hohe epistemische Sicherheit in Aussagen bezüglich der Vorhersagbarkeit von MEGATRENDS wird bei SIEMENS nochmals mittels der Nutzung des Futurs markiert:

Globale Megatrends sind langfristige Prozesse, die die globale Nachfrage in den kommenden Jahrzehnten maßgeblich beeinflussen werden. Wir bei Siemens sehen demografischen Wandel, Urbanisierung, Klimawandel sowie Globalisierung als Megatrends, die alle Menschen betreffen und die globale Entwicklung prägen werden. (Siemens GB 2010)

Die von SIEMENS angesprochenen EREIGNISSE (*demografische[r] Wandel, Urbanisierung, Klimawandel* sowie *Globalisierung*) scheinen aufgrund ihrer vielfachen Nennung so brisant für UNTERNEHMENSIDENTITÄT im Untersuchungszeitraum zu sein, dass sie im folgenden Abschnitt abermals vertieft werden.

#### **1.2.12.4 KONKRETISIERTE EREIGNISSE**

Bereits beschriebene EREIGNISSE (HERAUSFORDERUNGEN, WANDEL) werden von den untersuchten Unternehmen durch KONKRETISIERTE EREIGNISSE phänomenalisiert, was sich ausdrucksseitig durch Hyponyme (*Globalisierung, Klimawandel* etc.) offenbart. Insgesamt werden am häufigsten GLOBALISIERUNG, KLIMAWANDEL, DEMOGRAPHISCHER WANDEL und BEVÖLKERUNGSWACHSTUM angesprochen. Unternehmen werten diese als EREIGNISSE auf, indem sie als *Themen* bezeichnet werden:

Der Kapitalmarkt interessiert sich dafür, ob wir auf globale Herausforderungen wie die demografische Entwicklung oder den Klimawandel vorbereitet sind. Und die Politik wünscht sich von uns, dass wir uns an der Lösung dieser Herausforderungen beteiligen – denn diese Themen sind so bedeutend, dass sie gemeinsame Antworten von Wirtschaft, Politik und Gesellschaft brauchen. (Metro GB 2010)

Bei METRO wird deren Wichtigkeit durch die Ausdrücke *bedeutend* sowie die Klassifikation *globale Herausforderungen* indiziert. Sprachstrukturell wird auf diese Sachverhalte meist durch sequentielle Reihungen aus Substantiven referiert (s.o.). Der Sachverhalt GLOBALISIERUNG dominiert diese Aussagen und ist darüber zahlreich in Strukturen der Sachverhaltsfestsetzung (*globalisierte\* X*) eingebunden:

Denn lebenslanges Lernen ist in einer globalisierten Welt unabdingbar. (Siemens GB 2010)

Damit einhergehend wird GLOBALISIERUNG als irreversibler PROZESS präsentiert und in den folgenden Belegen negativ konnotiert, wobei DAIMLER sich als ‚Helfer‘ konzeptualisiert (*unumkehrbare[r] Prozess; menschliche[s] Gesicht der Globalisierung*):

Daimler unterstützt die Initiative der Vereinten Nationen und will gemeinsam mit anderen Unternehmen und Institutionen verhindern, dass der unumkehrbare Prozess der Globalisierung bei den Menschen auf dieser

---

<sup>410</sup> In einer weiteren Matrix werden darüber hinaus die *Handlungsfelder* ausgearbeitet, in denen konkrete *Einflussmöglichkeiten von K+S, Stakeholdererwartungen, Chancen* und *Risiken* aufgeführt werden (vgl. K+S GB 2010). Es ist dabei auffällig, dass RISIKEN kaum spezifiziert bzw. als ‚nicht gegeben‘ aufgeführt werden.

Welt Ängste auslöst. [...] Daimler will das menschliche Gesicht der Globalisierung auch durch die Schaffung und den Erhalt von Arbeitsplätzen zeigen. (Daimler Verhaltensrichtlinien) (Daimler Verhaltensrichtlinien)

SIEMENS erläutert in den folgenden Textbelegen ausführlich den geschichtlichen Verlauf der GLOBALISIERUNG aus Unternehmensperspektive, indem auf ZAHLEN, STUDIEN und HISTORISCHE ENTWICKLUNGEN Bezug genommen wird.<sup>411</sup> Die Sachverhaltsfestsetzung von GLOBALISIERUNG bei SIEMENS wird auch durch Terminologisierungen verstärkt (*Globalisierung bezieht sich [...], Globalisierung führt zu [...]*):

Globalisierung bezieht sich auf die zunehmende Verflechtung der weltweiten Volkswirtschaften, der Politik, der Kulturen und weiterer Lebensbereiche. Zwischen 1950 und 2007 hat sich das Welthandelsvolumen jährlich im Durchschnitt um 6,2 % erhöht. Die Zahl multinationaler Unternehmen ist weltweit von etwa 10.000 in den Jahren 1968/69 auf mehr als 80.000 im Jahr 2008 angestiegen. Darüber hinaus entwickeln sich die vier größten Schwellenländer – Brasilien, Russland, Indien und China (BRIC) – immer mehr zu bedeutenden Akteuren der Weltwirtschaft. Globalisierung führt zu steigendem Wettbewerbsdruck sowie zur Nachfrage nach wirtschaftlichen und hochqualitativen Produkten und Lösungen mit kurzen Entwicklungszyklen. (Siemens GB 2010)

Auf der Satzebene werden die Aussagen zu GLOBALISIERUNG häufig unter Verwendung von hoher epistemischer Sicherheit gegenüber des Bestehens des Sachverhalts getätigt, da assertive Sprachhandlungen im Präsens oder Futur erfolgen (*Globalisierung [...] wird etc.*):

Globalisierung. Die Logistikindustrie wird auch in Zukunft stärker wachsen als die jeweiligen Volkswirtschaften. Handelsströme und -volumina von und nach Asien sowie innerhalb des asiatischen Raumes legen weiter kräftig zu. (Deutsche Post GB 2010)

Diese Aussagen im Sinne des „zukünftigen Sprechens“ (*Forecasting*<sup>412</sup>) und der „Futurologie“ (Fairclough, 2003, 167) werden als Fakten präsentiert, was jedoch stark mit interesselaiteten Darstellungen (vgl. Felder 2013, 15) der Unternehmen korreliert.

Auch KLIMAWANDEL erfährt im Korpus Thematisierung und wird als Sachverhalt in Prädikationen mit *sein* oder in Terminologisierungen festgesetzt:

Der Klimawandel ist eng an die demografische Entwicklung gekoppelt. (Siemens GB 2010)

Klimawandel. Das vergangene Jahr hat erneut gezeigt, dass das gestiegene Bewusstsein für Umwelt und Klima die Logistikbranche maßgeblich beeinflusst. In allen Geschäftsbereichen fragen Kunden vermehrt klimaneutrale Produkte nach. (Deutsche Post GB 2010)

Wiederum SIEMENS unterstreicht die hohe Faktizität seiner Aussagen zu KLIMAWANDEL durch den Ausdruck *Tatsache*:

Der Klimawandel ist eine Tatsache. Die durchschnittliche Temperatur der Erdoberfläche hat sich zwischen 1850 und dem Beginn des 21. Jahrhunderts um 0,76° Celsius erhöht. (Siemens GB 2010)

---

<sup>411</sup> Vgl. dazu auch: „Wie stark die Welt zusammenwächst, belegen die folgenden Zahlen: Aus ungefähr 10.000 multinationalen Unternehmen in den Jahren 1968/69 wurden innerhalb von rund 40 Jahren mehr als 80.000.“ (Siemens GB 2010).

<sup>412</sup> Vgl. dazu Grewal (2008, 212): “The trend of peering into the future has weakened in the social sciences but forecasting persists as a technique in policy analysis. The prefaces and foreword sections of the policy report genre are a rich source of beliefs of the policy elite. Often hyperbolic in character, prefaces and forewords represent one important source of value judgements and beliefs of policymakers [...].”

In den Aussagen zu KLIMAWANDEL scheint vor allem das Konzept ›Klimawandelfolgen‹ dominant, wobei Adressaten miteinbezogen werden, indem deren Lebenswelt durch die ‚negativen‘ KLIMAWANDELFOLGEN scheinbar beeinträchtigt wird:

Infolge des Klimawandels ist zukünftig häufiger mit extremen Wetterereignissen zu rechnen. Starke Stürme, Überflutungen sowie lange Trockenperioden könnten die Sicherheit der Stromversorgung beeinträchtigen. (RWE Unsere Verantwortung 2010)

Laut einer Studie der Unternehmensberatung Boston Consulting wird sich der Fahrzeugbestand in den nächsten 40 Jahren auf 2 Milliarden Autos verdoppeln. Ohne vollelektrischen Antrieb kann das Weltklima diesen Zuwachs an Verkehrsmitteln nicht verkraften. (Infineon GB 2010)

Die Belege offenbaren, dass bei KLIMAWANDEL – im Gegensatz zu GLOBALISIERUNG – stärker mit dem Bedrohungstopos (→ 8.4.2.2) in der textuellen Argumentation gearbeitet wird, den Unternehmen einsetzen, um ihre Handlungen (bzw. auch ihre Existenz) als notwendig erscheinen zu lassen, etwa die Entwicklung von ELEKTROANTRIEBEN bei INFINEON. Laut Klaffen (1999, 158) wird dadurch bewusst mit den Ängsten der Gesellschaft sowie deren Betroffenheit gespielt, um diese für die nachfolgende Argumentation sensibel zu machen, d.h. die Relevanz unternehmerischen Handelns.

Als drittes KONKRETISIERTES EREIGNIS findet sich DEMOGRAPHISCHER WANDEL. Bei diesem wird ebenso eine besonders hohe epistemische Sicherheit gegenüber dem Wahrheitsgehalt der Aussagen postuliert (durch Bezugnahme auf STUDIEN/ZAHLEN, Futureinsatz etc.):

Der demografische Wandel wirkt sich auf die Produktentwicklung für Europa aus. Die Europäer werden immer älter. Die Lebenserwartung der nahezu 500 Millionen Einwohner der EU-Staaten hat sich in den vergangenen vier Jahrzehnten um durchschnittlich acht Jahre verlängert. Schon heute liegt der Anteil der Bürger, die 65 Jahre und älter sind, bei 17 Prozent. Dieser Wert wird bis zum Jahr 2030 voraussichtlich auf etwa 23 Prozent steigen. Beiersdorf muss sich deshalb verstärkt auf die speziellen Anforderungen älterer Haut einstellen. (BDF GB 2010)<sup>413</sup>

Sprachlich bewertet wird der DEMOGRAPHISCHE WANDEL als *besondere/größte Herausforderung*.<sup>414</sup> Auffallend sind die in diesem Zusammenhang verbalisierten ERWARTUNGEN (*erwartet\**), die ebenso eine hohe epistemische Sicherheit der Aussagen zu DEMOGRAPHISCHER WANDEL suggerieren:

Ausbildung und Nachwuchsförderung besitzen angesichts des demografischen Wandels und eines vielerorts erwarteten Fachkräftemangels für die Zukunftsfähigkeit des Unternehmens entscheidende Bedeutung. (Bayer Namen.Zahlen.Fakten 2010/2011)

Exemplarisch zeigt dieser Beleg von BAYER, dass vor allem die ›Knappheit von Arbeitskräften durch den demographischen Wandel‹ beim DEMOGRAPHISCHEN WANDEL in den Vorder-

---

<sup>413</sup> Vgl. dazu auch: „Demografischer Wandel und Gesundheit. Im Jahr 2011 leben mehr Menschen als je zuvor auf der Welt, und noch nie war ihre Lebenserwartung so hoch. [...] Werden die Menschen im weltweiten Durchschnitt derzeit circa 68 Jahre alt, so gehen Experten von 76 Jahren zur Jahrhundertmitte aus. 1950 waren es 46 Jahre.“ (Siemens GB 2010).

<sup>414</sup> Vgl. dazu: „Der demografische und gesellschaftspolitische Wandel in Europa und Nordamerika stellt eine besondere Herausforderung dar: Entgegen der bisherigen insbesondere in Europa anzutreffenden Praxis der Vorruhestandsregelungen und Altersteilzeitmodelle gibt es in der zukünftigen Arbeitswelt durchschnittlich ältere Belegschaften.“ (K+S GB 2010).

grund gehoben wird, was die Metaphern *Kampf /Wettbewerb um (x) Arbeits-/Fachkräfte* zu-  
spitzen:

Nur wenn E.ON in einem sich stark verändernden demografischen Umfeld und dem damit verbundenen Kampf um die Fachkräfte als attraktiver Arbeitgeber wahrgenommen wird, werden wir auch die am besten qualifizierten und talentiertesten Mitarbeiter gewinnen und langfristig an uns binden können. (E.ON GB 2010)

Die DEUTSCHE POST dagegen perspektiviert DEMOGRAPHISCHER WANDEL durchaus positiver, wenn nicht von *demographischer Wandel* gesprochen wird, sondern euphemisierend von *Generationen, ältere Mitarbeiter, „altersgemischte“ Belegschaften und Kompetenzen der Älteren*. Dadurch erreicht das Unternehmen sprachliche Alleinstellung:

Generationen. Mit gezielten Maßnahmen zu Personal-Recruiting, Personalbindung und -entwicklung will Deutsche Post DHL dazu beitragen, das Potenzial der Beschäftigten vor dem Hintergrund sinkender Bevölkerungszahlen und steigendem Altersdurchschnitt zu nutzen. Immer mehr ältere Menschen wollen weiter aktiv am Berufsleben teilhaben. Wir wissen, dass es sich auszahlt, unsere Personalpolitik nicht nur auf jüngere Mitarbeiter zu konzentrieren. Denn ältere Mitarbeiter haben große Stärken. Zu diesen gehört insbesondere ein hohes Maß an beruflicher Erfahrung und betrieblichem Know-how. Gerade „altersgemischte“ Belegschaften, die in einer gesunden Mischung Kompetenzen der Älteren mit dem aktuellen Wissen der Jüngeren kombinieren, sind in hohem Maße produktiv. (Deutsche Post Werte und Kultur)

Ein weiteres KONKRETISIERTES EREIGNIS, das in den Repräsentationstexten angesprochen wird, ist das BEVÖLKERUNGSWACHSTUM. Hierbei fällt wiederum die starke Verknüpfung mit dem Bedrohungstopos auf:

Auf der Erde leben rund 6,9 Milliarden Menschen, und ständig werden es mehr. (BDF GB 2010)

Die VERMEHRUNG wird sprachlich durch Adverbien der Kontinuität (*ständig, immer*) und den Komparativ *mehr* als ›Bedrohung‹ perspektiviert. Besonders K+S arbeitet mit dieser Konzeptualisierung und leitet daraus deontisch (*muss*) die Notwendigkeit der Unternehmensexistenz ab:

Immer mehr Menschen brauchen immer mehr Nahrung. Das bedeutet, dass auch die Getreide- und Nahrungsmittelproduktion immer weiter wachsen muss. (K+S GB 2010)

BEVÖLKERUNGSWACHSTUM wird auch durch das Verb *wachsen* unter Dominantsetzung von Verben bzw. Partizipien, die einen vertikalen Anstieg ›nach oben‹ denotieren (*gesteigert, steigenden*), ausgedrückt:

Die Weltbevölkerung wächst und mit ihr die Nachfrage nach Energie. Es geht darum, den steigenden Energiebedarf zuverlässig zu decken und gleichzeitig die CO<sub>2</sub>-Emissionen deutlich zu senken. Linde trägt mit einer Reihe von innovativen Technologien dazu bei, diese Herausforderung zu meistern. (Linde GB 2010)

Bei diesen Aussagen fällt auf, dass die Unternehmen eine Monokausalität formulieren: BEVÖLKERUNGSWACHSTUM führt automatisch zu einer verstärkten NACHFRAGE nach ihren PRODUKTEN. So unterstreichen sie in deontischer Weise (*muss/müssen, unabdingbar*) die Bedeutsamkeit ihrer Existenz als Unternehmen per se.<sup>415</sup> KONKRETISIERTE EREIGNISSE, die im weite-

---

<sup>415</sup> Verstärkend wirkt in manchen Belegen der antithetisch zum BEVÖLKERUNGSWACHSTUM präsentierte Sachverhalt RESSOURCENBEGRENZUNG (→ 8.4.2.2).

ren Zusammenhang auftauchen, sind schließlich TECHNOLOGISCHER WANDEL<sup>416</sup>, MOBILITÄTSSTEIGERUNG, URBANISIERUNG, WOHLSTANDSSTEIGERUNG, LEBENSFORMENWANDEL<sup>417</sup> sowie STRUKTURWANDEL<sup>418</sup>. Diese werden lexikalisch vielfach realisiert und insgesamt seltener als ›Bedrohung‹ konzeptualisiert, sondern neutral bis positiv als ›freiwillig herbeigeführte Wandelphänomene‹ perspektiviert.<sup>419</sup> Während MOBILITÄT vor allem von den Automobilisten und INFINEON besetzt wird, greift SIEMENS wiederum stark die URBANISIERUNG auf.<sup>420</sup> Gensondert gehen FRESENIUS MEDICAL CARE und FRESENIUS auf WOHLSTANDSSTEIGERUNG ein, um aus der Pathologisierung des Sachverhalts (*Wohlstandsphänomene* als ›Krankheitsverursacher‹<sup>421</sup>) ihren Existenzanspruch sowie ihren gesamtgesellschaftlichen Nutzenbeitrag abzuleiten.

#### 1.2.12.5 Fazit: EREIGNISSE

Insgesamt offenbart das Kapitel EREIGNISSE nicht nur eine sehr hohe Beleganzahl, sondern ein stark homogenisiertes Basisinventar an Lexemen in verschiedenen Zusammensetzungen, die als beliebig miteinander kombinierbar erscheinen:

- dimensionale Adjektive (*global\*/groß\*/enorm\*/gewaltig\** etc.), um ›Größe‹ und ›Ausmaß‹ der EREIGNISSE zu bezeichnen;
- Adjektive im Komparativ, Partizipien oder Adverbien (*zunehmend\*, wachsend\*, gewachsen\*, schneller\*, immer, mehr, (be)ständig\*, fortschreitend\** etc.), um ›Bedrohung‹ und ›Dynamik‹ anzuzeigen;
- Verben (*wachsen, (an)steigen, zunehmen*), welche einen vertikalen Anstieg durch die Bewegung ›nach oben‹ konzeptualisieren.

---

<sup>416</sup> TECHNOLOGISCHER WANDEL wird im Gegensatz zu den anderen Wandelerscheinungen eher als positives EREIGNIS konstituiert und lexikalisch vielfach versprachlicht. Vgl. dazu: „Technologie spielt für Unternehmen bei der Umsetzung ihrer Strategie eine entscheidende Rolle. Mit In-Memory Computing, Cloud Computing und Mobilität kommen in den nächsten drei bis fünf Jahren drei Haupttrends zusammen, die den größten Generationenwechsel seit dem Übergang von der Mainframe- zur Client-Server-Architektur in den frühen 1990er Jahren bedeuten. Diese bahnbrechenden Neuerungen werden Unternehmen nicht nur innovative Geschäftsabläufe ermöglichen, sondern einen grundlegenden Wandel in der Wirtschaft bewirken und vorantreiben.“ (SAP GB 2010).

<sup>417</sup> Vgl. dazu: „Bei unseren Angeboten, mit denen wir die Vereinbarkeit von Beruf und Familie fördern, setzen wir auf Modelle wie Gleitzeit, Teilzeit und Freistellungen.“ (HeidelbergCement GB 2010).

<sup>418</sup> Vgl. dazu: „Die Automobilindustrie steht mitten in einem rasanten Strukturwandel.“ (VW GB 2010).

<sup>419</sup> Vgl. dazu: „Vor allem die wachsenden Megacities brauchen nachhaltige Technologien für die individuelle Mobilität.“ (Infineon Wer wir sind).

<sup>420</sup> Vgl. dazu: „Die Urbanisierung bezieht sich auf die weltweit wachsende Zahl von großen städtischen Ballungsgebieten, etablierte Großstädte in den Industrienationen ebenso wie schnell wachsende Ballungszentren in den Schwellenländern. Im Jahr 2009 lebte erstmals in der Menschheitsgeschichte mehr als die Hälfte der Weltbevölkerung in Städten.“ (Siemens GB 2010).

<sup>421</sup> Vgl. dazu: „Immer mehr Menschen leiden an chronischem Nierenversagen [...]. Beschleunigt wird dieser Trend durch die Zunahme von Bluthochdruck und Diabetes – typischen Vorerkrankungen des Nierenversagens, die sich durch „Wohlstandsphänomene“ wie Bewegungsmangel, ungesunde Ernährung und Übergewicht rund um den Globus immer schneller verbreiten. Ein Schwerpunkt unserer Forschung und Entwicklung sind deshalb Heimtherapien – die Peritonealdialyse [...].“ (FMC GB 2010).



Inhaltlich ließe sich mit Felder (2010, 556) auch hierbei von Sachverhaltsfixierungsversuchen sprechen, indem unter den Bezeichnungen *\*krise*, *\*wandel*, *Herausforderungen* oder *\*trend* bestimmte EREIGNISSE thematisiert und stigmatisiert werden. Im nächsten Schritt wird (unter der Verwendung der gezeigten sprachlichen Mittel und einer hohen epistemischen Sicherheit) die Anomalität dieser EREIGNISSE herausgehoben (Bedrohungstopos), worauf Verunsicherung und Ängste bei Anspruchsgruppen bezüglich solcher Prognosen entstehen. Zugleich wird aufgeführt, dass diese Entwicklungen solche Verbreitung genießen, dass sie als neudefinierter Normalitätsstandard gelten können (als *Trend*; unterstützt durch Bezugnahme auf ZAHLEN etc.). Gerade bei SIEMENS wurde deutlich, wie einzelnen EREIGNISSEN durch die Etikettierung als *Herausforderungen*, *Globalisierung* oder *demographischer Wandel* ihre Bedeutung sowie ihr Wiedererkennungswert zugesprochen wurde, die mit der eigenen UNTERNEHMENSIDENTITÄT verknüpft wurden. Als Folge bekommen die Rezipienten die Möglichkeit, FINANZ- UND WIRTSCHAFTSKRISE, HERAUSFORDERUNGEN und WANDEL nunmehr als allgegenwärtigen ZUSTAND bzw. ZEITRAUM (›Krisenzeitraum‹, ›Wandelzeitraum‹), in dem sie sich natürlicherweise befinden, anzuerkennen und die untersuchten Unternehmen als notwendige Systeme (durch deren Existenz und Produktangebot) zu identifizieren.

### 1.2.13 ORTE

Die sprachliche Konstruktion von RÄUMEN bzw. ORTEN ermöglicht es Unternehmen, ihre UNTERNEHMENSIDENTITÄT in konkrete Raumgefüge zu verorten. In der Analyse geht es dabei um DEUTSCHLAND (→ dieser Anhang, 1.13.1), EUROPA (→ dieser Anhang, 1.13.2), WELT/GLOBALITÄT (→ dieser Anhang, 1.13.3), INTERNATIONALITÄT (→ dieser Anhang, 1.13.4), REGIONEN, LÄNDER/STAATEN, KONTINENTE (→ dieser Anhang, 1.13.5) sowie konkrete STANDORTE (→ dieser Anhang, 1.13.6), die in den folgenden Kapiteln analysiert werden.

#### 1.2.13.1 DEUTSCHLAND

Alle Unternehmen im Korpus sind international tätig – manche mehr oder weniger als *Global Player* im *Konzert der globalen Konzerne* (HENKEL *Corporate Identity*). Sie sind also – theoretisch – multinational, multikulturell und multilingual.<sup>422</sup> Kastens (2008, 125f.) definiert jedoch die HERKUNFT (geographische Verankerung) von Unternehmen als besonders starke identitätsstiftende Komponente, was im Korpus durch das hochfrequente Wort und *Keyword*

---

<sup>422</sup> Das Handeln bzw. die Verortung der Dax-30-Unternehmen lässt sich nicht nur allein aus deutscher Perspektive erklärt werden. In dieser Arbeit muss diese Vereinfachung (deutsche Perspektive) jedoch zur Komplexitätsreduktion vorgenommen werden. Laut Gunnarsson (2010, 172) müssen sich Unternehmen praktisch in allen Varietäten ihres Selbst darstellen. Vgl. dazu ebenfalls Habscheid/Müller (2012): „Wie sind bei (mehr-)sprachigen Vorgängen im Geschäftsalltag die Vorteile lokaler Identitäten gegen die der größeren Reichweiten aufzuwiegen?“.



*deutsch\**, das als Morphem in den Konkordanzen 4.168 *Hits* aufweist, ausgedrückt wird. Als Adjektiv attribuiert *deutsch\** meist die Lexeme *Markt* oder *Standort\**:

Zukunftskonzept 2016 sichert die deutschen Standorte. (K+S GB 2010)

In Verbindungen mit *deutsch\**, *\*konzern* oder *\*unternehmen* werden Unternehmen zudem aus einer bereits gefilterten *Ingroup* herausgehoben und dadurch zum Primus inter Pares (→ 8.2.3.6):

Als erster deutscher Klinikkonzern hat HELIOS im Jahr 2010 eine eigene, selbst entwickelte Applikation (App) für das iPhone und den BlackBerry gestartet – den KlinikFinder. (Fresenius GB 2010)

Henkel ist heute in 125 Ländern der Erde tätig und beschäftigt über 52.000 Mitarbeiter. Rund 80 Prozent von ihnen arbeiten außerhalb Deutschlands, womit Henkel eines der am stärksten international ausgerichteten deutschen Unternehmen ist. (Henkel Corporate Identity)

In den folgenden Belegen von K+S wird durch das fakultative Attribut *deutsch\** explizit auf die ‚deutsche‘ HERKUNFT von BERGWERKEN/LAGERSTÄTTEN verwiesen. Im zweiten Beleg wird diese gesondert durch *ausschließlich* hervorgehoben (>deutsche Herkunft<):

Wir gewinnen Kali- und Magnesiumrohsalze für eine jährliche Produktionsleistung von bis zu 7,5 Mio. t Ware in sechs deutschen Bergwerken. (K+S GB 2010)

Noch bis zum Jahr 1999 war K+S ein Kali- und Salzproduzent, der seine Rohstoffe ausschließlich aus deutschen Lagerstätten gewonnen hat. (K+S GB 2010)

Das Merkmal ‚deutsch‘ gilt hier somit als Profilierungs- bzw. Alleinstellungsmerkmal, da es zum Verständnis der Aussagen nicht notwendig ist. Es wird in einigen Fällen auch genutzt, um Wissen in Bezug auf nationale Stereotype aufzurufen:

Unsere Unternehmenskultur vereint deutsche Eigenschaften und internationales Flair. (Allianz Kultur und Werte)

Für das Adjektiv *deutsch* nennt Olins (2001, 6) Konnotationen wie ‚Gründlichkeit‘, ‚Präzision‘, ‚Qualität‘ sowie ‚Ingenieurskönnen‘, welche in folgenden Belegen präsupponiert werden:<sup>423</sup>

Unter dem Slogan „Volkswagen – Das Auto.“ vereint die Marke Volkswagen Pkw die drei Kernbotschaften „innovativ“, „werthaltig“ und „verantwortungsvoll“. Weltweit verbinden die Kunden mit dieser Marke die Attribute Qualität, Zuverlässigkeit und deutsche Ingenieurskunst. (VW GB 2010)

Durch ihr Know-how gelten deutsche Gesundheitsunternehmen in Russland als verlässliche und qualifizierte Partner. (FMC GB 2010)

Das Substantiv *Deutschland\**, das als *Keyword* und Hochfrequenzwort (1.531x) fungiert, wird im Korpus dagegen eher neutral als lokale Angabe *in Deutschland* genutzt:

Die BMW Group ist weltweit einer der erfolgreichsten Hersteller von Automobilen und Motorrädern und zählt zu den größten Industrieunternehmen in Deutschland. (BMW GB 2010/Konzernporträt)

Die Deutsche Post ist der einzige Universaldienstleister von Postdiensten in Deutschland. (Deutsche Post Daten und Fakten)

---

<sup>423</sup> ‚Deutsch‘ scheint für die Automobilisten ein Profilierungsmerkmal, obwohl diese nicht mehr ausschließlich in Deutschland produzieren lassen. Vgl. dazu auch: „20. Juli 2010. Die internationale Fahrpräsentation in San Francisco zeigt den neuen, in seinen Dimensionen deutlich gewachsenen Jetta als sportlich-avantgardistische und zugleich verbrauchseffiziente Limousine – German Engineering at its best.“ (VW Zahlen.Daten.Fakten).

Zahlreich taucht *Deutschland* auch in Kookkurrenz mit *Standort*\* auf (>deutscher Standort<):

Henkel produziert in 57 Ländern an 188 Standorten. Unsere größte Produktionsstätte befindet sich in Düsseldorf, Deutschland. (Henkel GB 2010)

Die wichtigsten Standorte unseres Forschungs- und Entwicklungsnetzwerkes sind Sindelfingen und Stuttgart-Untertürkheim in Deutschland. (Daimler GB 2010)

Wie die letzten Belege zeigen, werden STANDORTE ebenso direkt mit Eigenamen aufgeführt. Der Verweis auf deutsche STÄDTE (>deutsche Städte<) findet sich auch ohne die Makrolokalisierung (>deutsche Standorte<) und konstruiert damit mikrolokal IDENTITÄT:

Der Firmensitz und die Konzernzentrale befinden sich in Stuttgart. (Daimler Unternehmensinformationen 2010)

An unserem Hauptsitz in München wird die internationale Atmosphäre an nahezu jedem Tisch in der Cafeteria deutlich. (Allianz Kultur und Werte)

Neben diesen Mikrolokalisierungen durch STÄDTE offenbaren sich auch Fügungen, die das Konzept >deutsche Regionen< (Mesolokalisierung) evozieren:

In der Oberpfalz, wo die BMW Group zusammen mit ihrem Joint-Venture-Partner SGL Group eine beispiellose Textilfabrik im Dienste des Karosseriebaus errichtet hat, werden die Faserbündel zu flächigen Textilien (sogenannten Gelegen) gewirkt und zu Rollen aufgewickelt. (BMW GB 2010/Strategie)

Eines der ersten großen Pilotprojekte mit Elektroautos in Deutschland ist nach einem Jahr abgeschlossen. Rund 100 Fahrer aus München und dem Umland legten mehr als 150.000 km zurück – emissionsfrei mit umweltfreundlichem E.ON-Strom aus bayerischer Wasserkraft. (E.ON Cleaner and better energy)

Deutsche STÄDTE oder REGIONEN werden dabei auch direkt mit PRODUKTEN (und damit metonymisch mit dem UNTERNEHMEN) verknüpft, was sich auf der lexikalischen Ebene zeigt:

Eröffnung der AutoStadt in Wolfsburg. (VW Zahlen.Daten.Fakten)

Mit Investitionen von insgesamt rund 500 Mio. EUR entwickelte Linde den Standort über die vergangenen Jahre zu einem der größten und modernsten Gasezentren in Europa, 430 Arbeitsplätze und 35 Ausbildungsplätze entstanden dabei. Nicht zuletzt dieses Engagement gab für eine Reihe anderer Unternehmen den Ausschlag, sich ebenfalls am Chemiestandort Leuna anzusiedeln. (Linde GB 2010)

Das Konzept >deutsche Standorte< wird jedoch nicht nur an PRODUKTE, sondern auch an eine spezifische GESCHICHTE bzw. KULTUR geknüpft (>deutsche Standorte< ‚langjähriges Bestehen und spezifische Kultur‘):

Kulturelle Vielfalt: Auf der ganzen Welt zu Hause. Obwohl unsere kulturellen Wurzeln in Darmstadt liegen, sind wir geübt im Umgang mit unterschiedlichen Kulturen und wissen Unterschiede zu respektieren. (Merck Einzigartig – Der Merck Weg)

Diese kultursymbolische Bedeutungsladung (*kulturelle[n] Wurzeln*) wurde bereits unter dem EREIGNIS-Mythos<sup>424</sup> diskutiert, der als zentral für die Identitätskonstruktion gezeigt wurde:

Ein denkwürdiges Jubiläum beging Linde beispielsweise in Leuna (Sachsen-Anhalt, Deutschland). Vor 20 Jahren ließ sich das Unternehmen auf dem Gelände des ehemaligen Chemiekombinats VEB Leuna nieder – als einer der ersten Privatinvestoren nach der politischen Wende. (Linde GB 2010)

---

<sup>424</sup> Vgl. dazu den Personen- und Ereignismythos – ERFINDER und ERFINDUNG (→ 8.2.3.5.5.1).

Bei DAIMLER zeigt sich diese Aufladung mit symbolischer Bedeutung anschaulich, denn die lokale Angabe [*i*]n *Mannheim* wird im folgenden Beleg auch syntaktisch herausgestellt:

Am 18. März 1895 startet der erste Linienverkehr mit einem benzinbetriebenen Bus zwischen Siegen, Netphen und Deuz. Der erste Kraftomnibus der Welt ist eine Entwicklung der Firma Benz & Cie. In Mannheim. (Daimler Das Unternehmen 2011)

Beleuchtet man die weitere Perspektivierung des Sachverhalts DEUTSCHLAND, fällt auf, dass, obwohl es sich um internationale Unternehmen handelt, dieser mit dem Konzept ›Deutschland ist innen‹ aufgerufen wird. Diese intrinsische Perspektive wird anhand topologischer Verfahren der Raumobjektivierung, da ein spezifischer Sehepunkt zwischen Einzelgrößen eingenommen wird (vgl. Köller 2004, 493), deutlich. In den folgenden Belegen markieren dies Deiktika (*hier*) sowie Präpositionen (*in, innen, aus [...] heraus*):

Wir sind – aus Deutschland heraus – ein weltweit agierendes Unternehmen. (Deutsche Bank Leitbild und Marke)

Der Schwerpunkt unseres Briefgeschäfts liegt in Deutschland. Hier ist der Briefmarkt seit Anfang 2008 vollständig liberalisiert. (Deutsche Post GB 2010)

Der Sehepunkt (›Deutschland ist innen‹) kann auch, wie im letzten Beleg durch *Schwerpunkt*, metaphorisch unterstrichen werden, was oftmals auch durch die Substantive *Basis*, *Wurzeln* oder *Verankerung* vorgenommen wird. Im folgenden Beispiel von E.ON ist *Heimatmarkt* zwar eine gängige Metapher der Fachsprache der WIRTSCHAFT, wobei der Heimatbegriff auch der Binnenlokalisierung (›innen‹) dient:

Dabei bleibt Europa der Schwerpunkt unserer Geschäftsaktivitäten, mit Deutschland als zentralem Heimatmarkt. (E.ON Cleaner and better energy)

Die Zentrierung (*zentral\**) auf DEUTSCHLAND und den Sehepunkt ›Deutschland ist innen‹ offenbart sich auch durch das Syntagma *außerhalb Deutschlands*:

80 Prozent unserer rund 48.000 Mitarbeiter arbeiten außerhalb Deutschlands. (Henkel GB 2010)

DEUTSCHLAND wird durch diese Innenperspektive in die Tiefensemantik ›intern und extern‹ (→ 6.5.2.6) eingebunden und durch Ausdrücke wie *Bekenntnis* oder *bekennen* als ORT wiederum symbolisch erhöht:

Unsere Ausbildungsaktivitäten sind auch Teil unserer gesellschaftlichen Verantwortung als Arbeitgeber in zum Teil strukturschwachen Regionen und ein Bekenntnis zum Standort Deutschland, der als wettbewerbsfähiger Industriestandort gut ausgebildeten Fachkräftenachwuchs braucht. (K+S GB 2010)<sup>425</sup>

Diese explizite Aufnahme des Syntagmas *Standort Deutschland* bei K+S ist gerade dann wichtig, wenn das Fortbestehen eines Standortes angezweifelt wird (vgl. Avenarius 2001, 1), was bei HEIDELBERGCEMENT explizit thematisiert wird:<sup>426</sup>

---

<sup>425</sup> Vgl. dazu auch: „Das Zukunftskonzept bekannt sich dazu, an den deutschen Standorten festzuhalten und die für eine erfolgreiche Tätigkeit erforderlichen Investitionen und Mittel bereitzustellen.“ (K+S GB 2010).

<sup>426</sup> HEIDELBERGCEMENT ist eines der wenigen Unternehmen, das auf die Schließung DEUTSCHER STANDORTE verweist: „Aufgrund geringer Auslastung und einem erwarteten Anstieg des Reparatur- und Investitionsbedarfs wurde das Zementwerk in Wetzlar zum Jahresende 2010 geschlossen.“ (HeidelbergCement GB 2010).

In Deutschland haben wir uns von vier Standorten getrennt. (HeidelbergCement GB 2010)

FRESENIUS MEDICAL CARE dagegen richtet sich explizit gegen die in den Aussagen präsentierte Konzeptualisierung ›Deutschland ist innen‹:

Fresenius Medical Care ist sehr international ausgerichtet und hat in Deutschland vergleichsweise wenige Mitarbeiter. (FMC GB 2010)

Das bedeutet im Umkehrschluss auch, dass DEUTSCHLAND im europäischen Vergleich keineswegs der bedeutendste STANDORT von FRESENIUS MEDICAL CARE ist. Deutsche Anspruchsgruppen sind somit auch mit einer europäischen Wettbewerbssituation konfrontiert. Im nächsten Kapitel wird daher vertiefend auf EUROPA eingegangen.

### 1.2.13.2 EUROPA

Im Vergleich zur Herkunftsmarkierung durch *deutsch\*/Deutschland* findet sich das Adjektiv *europäisch\** (859x) seltener im Korpus:

Rund 2.600 Mitarbeiter arbeiten daran, einen der größten Dienstleistungsaufträge im europäischen Krankenhausbereich erfolgreich zu erfüllen. (Fresenius GB 2010)

Die früher national geführten Kraftwerksparkes bilden heute ein umfassendes europäisches Portfolio, das zentral gesteuert wird und auf Marktpreisentwicklungen schnell und effizient reagieren kann. (E.ON Cleaner and better energy)<sup>427</sup>

Das Substantiv *Europa* (1.045x) wird dagegen häufiger als Genitivattribut angeschlossen:

Der Volkswagen Konzern mit Sitz in Wolfsburg ist einer der führenden Automobilhersteller weltweit und der größte Automobilproduzent Europas. (VW Zahlen.Daten.Fakten)

Durch langfristige Einkaufsverträge hat sich E.ON eine strategische Bezugsbasis im zunehmend globalen Nachfragewettbewerb um Erdgas geschaffen und stärkt somit die Versorgungssicherheit Europas. (E.ON Cleaner and better energy)

Vor allem E.ON beansprucht, wie die Belege zeigen, eine eurozentrische Position:

Europa ist und bleibt der deutliche Schwerpunkt unserer geschäftlichen Aktivitäten. (E.ON GB 2010)

Verstärkt wird dieser Anspruch wiederum durch das Verb *bekennen*:

E.ON bekennt sich dabei klar zu einer starken Position im europäischen Markt und profitiert zusätzlich von neuem, internationalem Wachstum. (E.ON Cleaner and better energy)

Insgesamt wird bei EUROPA ebenfalls eine intrinsische Perspektivierung mittels der Metapher *Heimatmarkt Europa* (›Europa ist innen‹) vorgenommen:

Gut aufgestellt // Unsere Top-Position im Heimatmarkt Europa eröffnet uns eine optimale Ausgangslage für die Erschließung weltweiter Märkte. Auch auf dem Kontinent erweitern wir unser Netz kontinuierlich um neue interessante Ziele. (Lufthansa GB 2010)

MAN nutzt diesbezüglich die Metapher *Rückgrat*:

Europa ist weiterhin der wichtigste Markt und somit das Rückgrat für MAN. (MAN GB 2010)

---

<sup>427</sup> Vgl. dazu auch: „Bei den Trucks haben wir die Zusammenarbeit mit dem russischen Lkw-Hersteller Kamaz vertieft und unsere Beteiligung aufgestockt: Das verschafft uns einen besseren Zugang zum größten europäischen Markt für Schwer-Lkw.“ (Daimler Unternehmensinformationen 2010).

Bei RWE kann *Europa* zugleich als Hyperonym gelten, da einzelne LÄNDER mittels Hyponymen darunter subsumiert werden:

Regionaler Schwerpunkt unserer Aktivitäten ist und bleibt Europa. Zu unseren Kernmärkten zählen wir Deutschland, Großbritannien, die Benelux-Region sowie Zentralost- und Südosteuropa. (RWE GB 2010)

Unser Markt ist Europa. RWE ist die Nr. 1 der Stromerzeuger in Deutschland, die Nr. 3 in den Niederlanden und die Nr. 3 in Großbritannien. (RWE GB 2010)

Die Belege von E.ON spiegeln wiederum anschaulich die semantische Dichotomie ›intern und extern‹ (s.o.) wieder, wobei die Innenperspektive (›Europa ist innen‹) eingenommen wird:

Wir stellen uns in Europa noch fokussierter auf. Wir erschließen gezielt Wachstumsmöglichkeiten außerhalb Europas. (E.ON Cleaner and better energy)<sup>428</sup>

Während die Märkte in Europa sich verbinden und integrieren, wirken globale Einflüsse immer stärker von außen auf Europa ein. (E.ON Cleaner and better energy)

EUROPA wird im letzten Beleg als ›bedrohtes Europa‹ perspektiviert, das E.ON als Unternehmen sichert. Im folgenden Beispiel wird dies noch deutlicher (*Versorgungssicherheit in Europa*):

Neben der Gasförderung und -beschaffung tragen auch unsere Infrastrukturbeteiligungen zu einem hohen Niveau der Versorgungssicherheit in Europa bei. (E.ON Cleaner and better energy)<sup>429</sup>

Dagegen wird in nachstehenden Aussagen keine eurozentrische Perspektive eingenommen, sondern EUROPA mit anderen KONTINENTEN gleichgesetzt:

Der Exportweltmeister China ist auch für die Vertriebslinien der METRO GROUP ein bedeutender Handelspartner. Von den günstigen Einkaufspreisen und der hohen Qualität profitieren Verbraucher in Asien und ganz Europa. (Metro GB 2010)

Diese Aussagen leiten direkt zum nächsten Kapitel über, denn die Belege zeigen zwar, dass Unternehmen stark auf ihre HERKUNFT (*Heimatmarkt*) referieren, zahlenmäßig dennoch Belege zu den Sachverhalten WELT/GLOBALITÄT sowie INTERNATIONALITÄT dominieren:

Infolge der seit 2006 zunehmenden Internationalisierung der K+S Gruppe sind mittlerweile ein Drittel der Mitarbeiter außerhalb von Deutschland und mehr als ein Viertel außerhalb von Europa beschäftigt. (K+S GB 2010)

### 1.2.13.3 WELT/GLOBALITÄT

Die DAX-30-Unternehmen haben Produktionsstätten auf der ganzen WELT, weshalb *Welt\** (797x) und *weltweit\** (mit 1.668 Hits und Keyword-Status) auf der lexikalischen Ebene häufig

---

<sup>428</sup> Vgl. dazu: „Das Portfolio des E.ON-Konzerns aus regenerativer und effizienter konventioneller Stromerzeugung ist geografisch und technisch so vielfältig wie kein anderes in Europa. Dadurch bieten sich erhebliche Optimierungsmöglichkeiten über nationale und regionale Grenzen hinweg, die wir für unseren Konzern und unsere Kunden nutzen können.“ (E.ON Cleaner and better energy). Vgl. dazu auch das Konzept ›Entgrenzung‹, was neben E.ON auch von anderen Unternehmen aufgenommen wird (→ FN 503); „Wir arbeiten Tag für Tag über nationale Grenzen hinweg, um gemeinsam das Beste zu erreichen.“ (Infineon Unser Infineon Team); „Grenzenlos. Jederzeit und überall die besten Verbindungen.“ (Telekom GB 2010).

<sup>429</sup> Andere LÄNDER/KONTINENTE werden von E.ON als ›Versorger Europas‹ konstituiert, was E.ON jedoch zugleich als *utopisch* einschränkt: „Energie für Europa aus Afrika. Es mag utopisch klingen, aber wir halten es für machbar: Die sengende Sonne in den Wüsten Nordafrikas soll Strom für Europa liefern.“ (E.ON Cleaner and better energy).

in den Repräsentationstexten erscheinen. Diese Lexeme beschreiben auf allgemeinsten Stufe „das Leben auf dem Planeten Erde“ (Galuschek 2012, 2). *Welt\** dient in Komposita der Evokation des Konzeptes ›ökonomische Entitäten auf Weltebene‹, was beispielsweise *Welthandel*<sup>430</sup>, *Weltmarkt*<sup>431</sup>, *Weltmarktanteil*<sup>432</sup> oder *Weltwirtschaft* ausdrücken. Unternehmen nutzen *Welt\** zudem in Rollenzuschreibungen („Führerschaft“) aus der Selbstperspektive:

Weltmarktführer bei Sand und Kies. (HeidelbergCement GB 2010)

HENKEL verkürzt diese Proposition durch die Ausdrücke *Weltunternehmen* und *Weltmarke*:

Der Weg von Henkel zur Weltmarke ist eng verknüpft mit dem Bekenntnis zu klaren Werten und einer transparenten Unternehmenspolitik. (Henkel Corporate Identity)

*Welt\** dient im Beleg von HENKEL nicht nur der Lokalisierung, sondern nimmt auch die Funktion eines positiv evaluierenden Adjektivs ein, das HENKEL als UNTERNEHMEN aufwertet.

Auf der Syntagmenebene zeigt sich das Syntagma *ganze\* Welt*, um die globale Präsenz der Unternehmen auszudrücken (›Weltpräsenz‹):

Unsere globale Präsenz ermöglicht es uns außerdem, Produkte und Services zusammen mit Kunden und Partnern auf der ganzen Welt zu entwickeln. (SAP GB 2010)

Bei der Belegdurchsicht finden sich wiederum Verknüpfungen mit dem Heimatbegriff durch *zu Hause*:

Beiersdorf ist auf der ganzen Welt zu Hause. (BDF Nachhaltigkeitsbericht 2010)

*Zu Hause* setzt eigentlich einen Fixpunkt (›Heimat‹) voraus, der im Beleg von BEIERSDORF auf viele einzelne ORTE verteilt wird, die erst in Zusammensetzung das ZUHAUSE des Unternehmens ausmachen (die WELT ist das ZUHAUSE). Auf diese Perspektivierung verweist auch der Ausdruck *in aller Welt*:

Bayer in aller Welt. (Bayer Namen.Zahlen.Fakten 2010/2011)

Als Varianten finden sich *überall auf der Welt*<sup>433</sup> sowie *überall [...]*, *wo* mittels Relativpronomen und -sätzen auf der Satzebene:

Sie [unsere Unternehmenseinheiten und Regionalgesellschaften, S.B.] stehen in engem und regelmäßigem Kontakt mit den jeweiligen Interessengruppen – und zwar überall dort, wo wir als Unternehmen aktiv sind. (K+S GB 2010)

Überall, wo wir arbeiten, wollen wir die Welt der Energie ein Stück weit verbessern. (E.ON Cleaner and better energy)

---

<sup>430</sup> Vgl. dazu: „Der Welthandel wuchs wieder zweistellig, wovon Deutschland als exportstarkes Land im besonderen Maße profitierte.“ (VW GB 2010).

<sup>431</sup> Vgl. dazu: „Einen Großteil des Umsatzes erwirtschaftet das Unternehmen [Bayer MaterialScience, S.B.] mit Produkten, die auf dem Weltmarkt Spitzenpositionen einnehmen.“ (Bayer Namen.Zahlen.Fakten 2010/2011).

<sup>432</sup> Vgl. dazu: „Unser Ziel ist, unseren Weltmarktanteil kontinuierlich zu steigern.“ (BDF Unser Profil).

<sup>433</sup> Vgl. dazu: „Von der konzernweiten Betreuung internationaler Mitgliedschaften bis hin zum kommunalen Engagement im Umfeld unserer Standorte überall auf der Welt – die Vielschichtigkeit und Komplexität unserer Stakeholderdialoge bedingt, dass unsere Unternehmenseinheiten und Regionalgesellschaften eine wichtige Rolle dabei übernehmen.“ (K+S GB 2010).



Des Weiteren wird auf WELT auch adjektivisch durch das Syntagma *weltweit\** + X (Substantiv) referiert, was das Merkmal ‚weite Ausdehnung‘ dominant setzt (z.B. *weltweite Zusammenarbeit*). In den meisten Belegen fungiert *weltweit* jedoch als (lokales) Adverb:

Unsere Rohstoff- und Produktionsbasis weltweit stärken und weltweit ausbauen. (K+S Mission)

Dabei steht *weltweit* häufig in besonderen Fokuspositionen am Satz- oder Phrasenbeginn:

Weltweit sind sowohl Düngemittel- als auch Salzmärkte durch saisonale wie auch regionale Nachfrageschwankungen gekennzeichnet. (K+S GB 2010)

Linde handelt verantwortlich gegenüber Aktionären, Geschäftspartnern, Mitarbeitern, der Gesellschaft und der Umwelt – weltweit, in jedem Geschäftsbereich, jeder Region und an jedem Standort. (Linde GB 2010)

Zahlreich werden solche Fügungen auf der Text-Bild-Ebene mit einer */Weltkarte/* verknüpft:

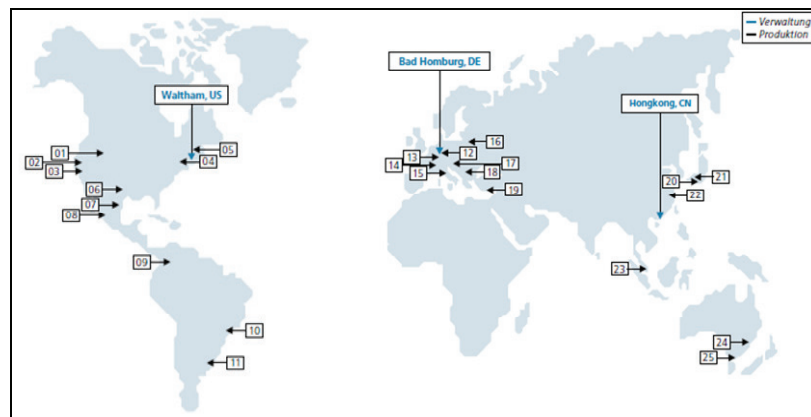

Abbildung 108 - FMC Kurzprofil 2010

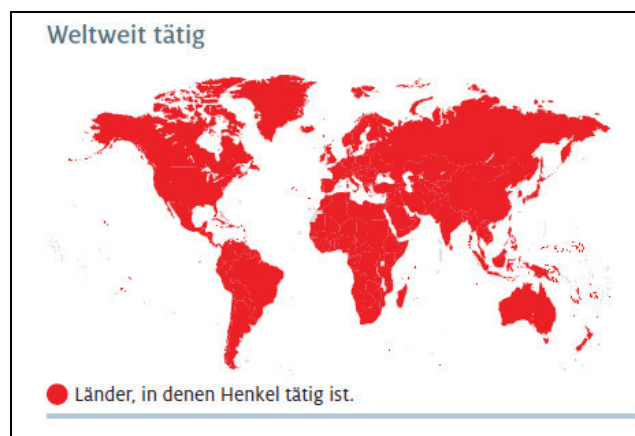

Abbildung 109 - Henkel GB 2010

Nicht nur die Bilder präsentieren dabei das Konzeptattribut ‚durchgängige Weltfläche‘, wobei HENKEL die gesamte WELT (*rot*) abzudecken scheint. Die Konzeptualisierung ‚durchgängige Weltfläche‘ wird auch durch Metaphern (*weltumspannend\**, *Netz\**, *rund um den Globus*) von anderen Unternehmen aufgenommen, um deren Omnipräsenz auf der WELT anzuzeigen:

Weltumspannendes Netz für zeitkritische Sendungen. Der Unternehmensbereich EXPRESS befördert eilige Dokumente und Waren zuverlässig von Tür zu Tür – auf festen Routen und mit standardisierten Abläufen. (Deutsche Post GB 2010)<sup>434</sup>

Fast 400.000 Beschäftigte produzieren an jedem Arbeitstag rund um den Globus rund 30.000 Fahrzeuge oder sind mit fahrzeugbezogenen Dienstleistungen befasst. (VW Zahlen.Daten.Fakten)

LINDE beschreibt schließlich eine systemimmanente unternehmensspezifische WELT (→ dieser Anhang, 1.1.6), die mit dem Eigennamen *Linde Welt* besetzt und text-bildlich konstruiert wird:

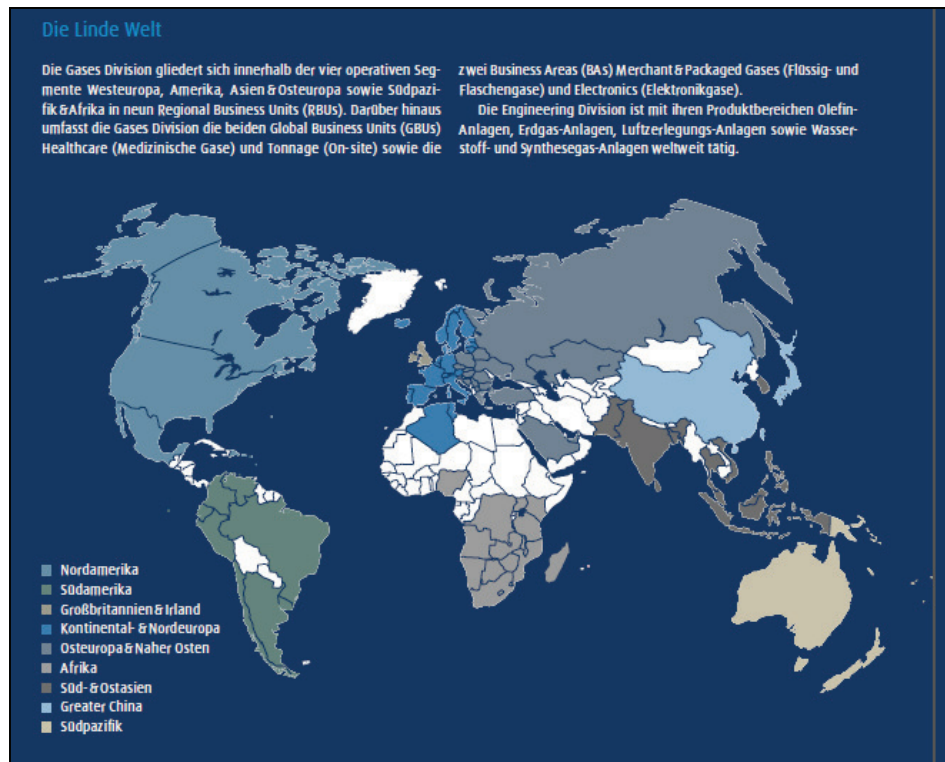

Abbildung 110 - Linde GB 2010

Eine hohe Wortbildungsproduktivität zeigt darüber ebenfalls der Wortstamm *\*global\** (1.253 Hits)<sup>435</sup>; seltener taucht das Substantiv *Globalität* auf, als vielmehr das Adjektiv *global\** in attributiver Stellung (*global\** + Substantiv). Damit wird auf ›Globalitätsträger‹ hingedeutet: ‚Märkte‘<sup>436</sup>, ‚Wettbewerb‘ und ‚Existenz‘<sup>437</sup>. Bei ‚Existenz‘ scheint das Syntagma *globale Präsenz* diskursiv verfestigt zu sein:

Globale Präsenz in Forschung und Entwicklung. (SAP GB 2010)

<sup>434</sup> Vgl. dazu auch: „Vernetztes Arbeiten! [...] Auf Basis einer weltumspannenden Infrastruktur aus Rechenzentren und Netzen liefern wir Informations- und Kommunikationstechnik (IKT) für multinationale Konzerne, mittelständische Unternehmen und öffentliche Institutionen.“ (Telekom GB 2010).

<sup>435</sup> Vgl. dazu Hilgendorf (2010, 72): “As a trend within the turn of globalization in the 1990s [...], also CIs shifted away from local to transnational, global.”

<sup>436</sup> Vgl. dazu: „Fresenius Medical Care hat eine starke Marktposition in globalen, wachsenden und größtenteils nichtzyklischen Märkten.“ (FMC GB 2010).

<sup>437</sup> Vgl. dazu: „Mit dem Programm „GoHelp“ nutzen wir globale Präsenz, logistische Kompetenz und Engagement der Mitarbeiter, um bei Naturkatastrophen die Logistik an den Flughäfen der betroffenen Regionen zu unterstützen.“ (Deutsche Post GB 2010).

Daraus entstehen auch Bedeutungsfixierungsversuche, wodurch das Merkmal ‚Existenz‘ direkt an das UNTERNEHMEN (*bedeutet für uns*) gebunden wird:

Globale Präsenz bedeutet für uns, dass wir unsere Position in traditionellen Märkten sichern und gleichzeitig in den neuen Märkten ausbauen wollen. (Daimler GB 2010)

Die direkte Zuschreibung geschieht auch durch die Syntagmen *globales Unternehmen* oder *globale\* Anbieter* und indiziert einen hohen Geltungsanspruch (→ 8.2.4.1.3):<sup>438</sup>

Als globales Unternehmen beschäftigt die SAP Mitarbeiter aus aller Welt. (SAP GB 2010)

Die neue Strategie bedeutet für E.ON die Transformation von einem primär europäischen Energieversorger zu einem globalen, spezialisierten Anbieter von Energielösungen – davon werden unsere Mitarbeiter, Kunden und Investoren gleichermaßen profitieren. (E.ON Cleaner and better energy)

Syntagmatisch wird *global\** häufig koordinativ mit *lokal\** verknüpft, was semantisch eine dichotomische Verbindung darstellt, und unter den dichotomischen axiomatischen Schemata des Diskurses bereits reflektiert wurde (>global und lokal< → 6.5.2.5).

Intensive Kooperationen mit Instituten und Universitäten auf lokaler und globaler Ebene ergänzen die eigenen Forschungs- und Entwicklungsaktivitäten. (HeidelbergCement GB 2010)

Besondere Herausstellungen dieser Konstruktion erfolgen auch syntaktisch (und visuell mittels Bindestrichen). Durch solche Aussagen wird suggeriert, dass beide Ausrichtungen (GLOBALITÄT und LOKALITÄT) parallel existieren. Auch text-bildlich wird diese Verknüpfung besonders von E.ON vorgenommen (*globale Einheiten – lokale Einheiten*):

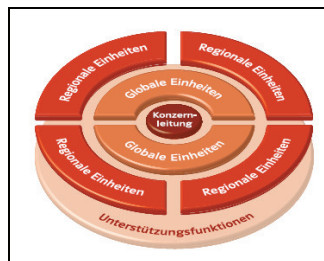

Abbildung 111 - E.ON GB 2010

Auf der Satzebene begleitet *global* beständig das Verb *agieren* (>Globalitätshandlung<):

Henkel agiert als Unternehmen global. 80 Prozent unserer rund 48.000 Mitarbeiter arbeiten außerhalb Deutschlands. (Henkel GB 2010)

Zusätzlich wird *global\**, im Sinne des hohen Absolutheitsanspruchs des Diskurses, komparativ bzw. superlativisch genutzt, obwohl *global\** semantisch nicht steigerbar ist:

In Zukunft wollen wir noch globaler agieren und haben mit unserer neuen strategischen Ausrichtung cleaner & better energy den Transformationsprozess zu einem globalen, spezialisierten Anbieter von Energielösungen eingeleitet. (E.ON Cleaner and better energy)

„Automotive“ bleibt eine unserer globalsten Branchen. (Deutsche Post GB 2010)

<sup>438</sup> Dazu zählt auch die Metapher *Global Player*, die jedoch insgesamt jedoch eher selten auftritt: „[...] vom Fabrikantenstolz des Gründers zum Understatement des Global Players.“ (Henkel Corporate Identity).

In dieser Hinsicht fallen auch die Pleonasmen *Total Global* (DEUTSCHE POST *Werte und Kultur*) sowie *globalisierte Welt* (z.B. COMMERZBANK *Die Werte der Commerzbank*) auf. Diese Fügungen lehnen sich, trotz ihrer semantischen Inkorrektheit, erneut an den erheblichen Absolutheitsanspruch der Unternehmen an.

Wie bereits beschrieben, taucht das Substantiv *Globalisierung* ebenfalls in Bezugnahme auf das EREIGNIS der GLOBALISIERUNG (→ dieser Anhang, 1.12.4) auf, das Unternehmen versuchen, für ihre Zwecke lexikalisch zu fixieren (*Globalisierungsstrategie*):

Im Friseurgeschäft führen wir unsere Globalisierungsstrategie weiter fort und setzen Wachstumsimpulse insbesondere in Asien, Lateinamerika sowie im Nahen Osten. (Henkel GB 2010)

Für die DAX-30 Unternehmen stellt dieses EREIGNIS, was sie als *Globalisierung\** bezeichnen, eine Möglichkeit dar, neue Märkte zu bedienen. Zugleich führt dieses jedoch zu einer Verschiebung der Wettbewerbssituation (*Wettbewerbsfähigkeit*):

Globalisierung und Wettbewerbsfähigkeit. Nationale Wirtschaftsräume verlieren an Bedeutung. Das 21. Jahrhundert startet mit einer fortschreitenden internationalen Vernetzung und immer mehr multinationalen Unternehmen. [...] Globalisierte Märkte bieten Unternehmen viele neue Chancen, erhöhen aber auch den Wettbewerbsdruck. Dabei kommt es zu regionalen Verschiebungen der Wirtschaftskräfte. Die Schwellenländer werden in Zukunft stärker als bisher die Wachstumsregionen der Welt sein. (Siemens GB 2010)

Gerade bei SIEMENS zeigt sich, dass die Bildung einer WELTÖKONOMIE (*globalisierte Märkte*), die nationale Strukturen aufbricht, und dadurch (neue) Identitätsformationen mit sich bringt, mit einer gleichlaufenden ›Bedrohung‹ (*Schwellenländer*) konstituiert wird. Abgeschlossene Unternehmenssysteme wie SIEMENS mit bislang klar definierten Ausgrenzungsmechanismen müssen sich dadurch neu ordnen (*Wettbewerbsdruck, Verschiebungen der Wirtschaftskräfte*). Diese These wird in Kapitel → 1.13.5 (in diesem Anhang) vertieft.

#### 1.2.13.4 INTERNATIONALITÄT

Im Gegensatz zu WELT/GLOBALITÄT wird beim Sachverhalt INTERNATIONALITÄT nicht das Konzept ›Weltökonomie‹, sondern das Konzept ›Einzelnationenverknüpfung‹ aufgerufen (v.a. bei Vw und FRESSENIUS MEDICAL CARE). Auf INTERNATIONALITÄT wird wenig durch das Substantiv *Internationalität*<sup>439</sup> referiert, sondern vor allem durch die Nutzung des Adjektivs *international\** (1.330x; *Keyword*)<sup>440</sup>, das meist im Syntagma *international\* + X* (Substantiv) folgende ›Internationalitätsträger‹ anzeigt:

- ‚Unternehmen‘;

ThyssenKrupp ist ein internationaler Konzern mit starker Basis in Deutschland. Rund zwei Drittel unserer Mitarbeiter und Kunden sind außerhalb Deutschlands zu Hause. (ThyssenKrupp GB 2010)

---

<sup>439</sup> Vgl. dazu: „Die Internationalität der Führungsebenen entspricht der globalen Ausrichtung unserer Geschäftstätigkeit.“ (Merck GB 2010).

<sup>440</sup> Wenige Belege zeigen das Adjektiv *multinational\**: „Auf Basis einer weltumspannenden Infrastruktur aus Rechenzentren und Netzen liefern wir Informations- und Kommunikationstechnik (IKT) für multinationale Konzerne, mittelständische Unternehmen und öffentliche Institutionen.“ (Telekom GB 2010).

- ‚Profil‘;

Der Fresenius-Konzern ist angesichts seiner starken internationalen Ausrichtung über alle Unternehmensbereiche regional und dezentral organisiert. (Fresenius GB 2010)

- ‚Handlungen‘;

Stärkere internationale Diversifikation: Angesichts steigender Standortrisiken wird eine breite regionale Aufstellung unseres Unternehmens immer wichtiger. (RWE GB 2010)

E.ON schafft sich im folgenden Beleg sprachliche Alleinstellung, indem der Ausdruck *Global Player* (s.o.) zu *internationale[n] Player* abgewandelt wird:

Ein eindrucksvoller Beleg unserer Kompetenz, mit neuen Technologien schnell zu einem bedeutenden internationalen Player zu werden – auch in Ländern, in denen wir zuvor nicht präsent waren. (E.ON Cleaner and better energy)

Des Weiteren taucht *international\** im Kontext von Ausdrücken, die sich auf ‚Personen‘ beziehen, auf (*Experten, Mitarbeiter, Führung\*, Talente*), die damit auch das Merkmal ‚international‘ zugeschrieben bekommen.<sup>441</sup>

Wie der Ausdruck *global* fungiert auch *international* beständig als Adverb in Konkurrenz mit den Verben *ausrichten, agieren, wachsen* sowie *tätig sein* (›Internationalitätshandlung‹):

Wir richten uns international aus und sind in rund 50 Ländern vertreten [...]. (Telekom GB 2010)

In den Belegen bestätigt sich ebenso das Muster der syntaktischen Herausstellung (→ 7.2.3):

Noch bis zum Jahr 1999 war K+S ein Kali- und Salzproduzent, der seine Rohstoffe ausschließlich aus deutschen Lagerstätten gewonnen hat. Durch Akquisitionen im Düngemittel- und im Salzgeschäft sind wir im vergangenen Jahrzehnt – vor allem international – stark gewachsen. (K+S GB 2010)<sup>442</sup>

FRESENIUS MEDICAL CARE benutzt darüber die (semantisch inadäquate) Steigerungsform:

Dieses Kliniknetz – das größte und internationalste überhaupt – bauen wir kontinuierlich aus, um der stetig wachsenden Zahl der Dialysepatienten Rechnung zu tragen. (FMC GB 2010)

In Folge zeigt das Substantiv *Internationalisierung* an, dass eine ›Internationalitätsabsicht‹ bei Unternehmen weiterhin vorhanden ist:

Die Internationalisierung des Unternehmens setzen wir konsequent weiter fort. Im Fokus unserer internationalen Aktivitäten stehen die Wachstumsregionen Osteuropas und Asiens. (Metro Corporate Principles)

Wie diese Aussage exemplarisch offenbart, sind im Kontext von *Internationalisierung* häufig *\*region\** oder Toponyme (*Osteuropa[s], Asien[s]* etc.) aufgeführt, die für die Unternehmen von Bedeutung sind. Das folgende Kapitel behandelt die dahinterstehenden Sachverhalte.

---

<sup>441</sup> Vgl. dazu: „Weltweit organisiert Fresenius Medical Care außerdem Fachtagungen, Vorträge und Workshops gemeinsam mit internationalen Experten der Nierenheilkunde.“ (FMC GB 2010).

<sup>442</sup> Vgl. dazu auch: „Mit innovativen Produkten gewährleistet Volkswagen Finanzdienstleistungen die sorgenfreie Mobilität der Kunden – und das verstärkt international.“ (VW GB 2010).



### 1.2.13.5 REGIONEN, LÄNDER/STAATEN, KONTINENTE

In Verbindung mit INTERNATIONALITÄT (und WELT/GLOBALITÄT) werden vielfach die Ausdrücke *\*region\*/\*länder/Staat\*/Kontinent\** in Kombination mit Toponymen genutzt. Diese Belege beziehen sich vor allem auf WACHSTUMSREGIONEN (*Wachstumsregion\**):

In den Wachstumsregionen Mittel- und Osteuropas sowie Asiens verfügen wir über starke Standbeine. (Commerzbank GB 2010/Herausforderungen annehmen, Ziele erreichen)<sup>443</sup>

Teilweise wird auch das Metonym *Wachstumsmärkte* dafür gebraucht:

HeidelbergCement ist im Konzerngebiet Osteuropa-Zentralasien in elf Ländern tätig. In den meisten dieser Wachstumsmärkte ist das Unternehmen nicht nur Marktführer im Zementbereich, sondern baut seine Stellung durch Kapazitätserweiterung auch kontinuierlich aus. (HeidelbergCement GB 2010)

Im folgenden Beispiel von BEIERSDORF wird der Ausdruck *Wachstumsmärkte* nochmals klar von *gesättigten Märkten* (wiederaufgenommen durch den Anglizismus bzw. Fachterminus *Emerging Markets*) abgegrenzt, die das Unternehmen lexikalisch situieren:

Zudem unterscheiden sich Wachstumsmärkte erheblich von gesättigten Märkten wie Westeuropa oder Nordamerika. Daher verantwortet ein eigener Vorstand die Emerging Markets, zu denen auch Lateinamerika gehört. Um von dieser Entwicklung nachhaltig zu profitieren, muss Beiersdorf ganz spezielle Wünsche erfüllen, die sich deutlich von denen in unserem deutschen Heimatmarkt unterscheiden. (BDF GB 2010)

›Wachstumsregionen‹ wird ausdrucksseitig durch die Toponyme *China, Indien, Russland* und *Brasilien*, durch *Schwellenländer* oder das Akronym *BRIC* evoziert:

Darüber hinaus entwickeln sich die vier größten Schwellenländer – Brasilien, Russland, Indien und China (BRIC) – immer mehr zu bedeutenden Akteuren der Weltwirtschaft. (Siemens GB 2010)

MAN ist auf allen fünf Kontinenten vertreten und setzt auf weiteres internationales Wachstum mit Schwerpunkt auf den BRIC-Ländern. (MAN GB 2010)

Besonders SIEMENS versucht, den Ausdruck *BRIC-Staaten* an die eigene unternehmerische Wertschöpfung zu koppeln:

Rund die Hälfte des Weltwirtschaftswachstums wird in den kommenden Jahren in den BRIC-Staaten Brasilien, Russland, Indien und China sowie im Nahen und Mittleren Osten erzielt. Wichtig für den Erfolg an diesen Märkten sind eine lokale Wertschöpfungskette sowie die direkte Geschäftsverantwortung vor Ort. Denn nur so können wir wirklich nah am Kunden sein. (Siemens GB 2010)

SIEMENS legitimiert seine Präsenz in den BRIC-STAATEN somit durch den Bezug auf ›Kundenzentrierung‹ (*wirklich nah am Kunden*) sowie an anderer Stelle durch das Historizitätsargument (*bereits seit über 100 Jahren*), was das Konzept ›Tradition legitimiert X‹ (→ dieser Anhang, 1.15.1) aufruft:

Siemens ist in rund 190 Ländern der Welt vertreten und bereits seit über 100 Jahren in den BRIC-Staaten tätig. (Siemens GB 2010)

Dahingehend versteht sich auch die Klassifizierung als *einheimisches Unternehmen*:

In vielen dieser Länder blicken wir auf eine lange Geschichte zurück, sodass wir häufig bereits als einheimisches Unternehmen betrachtet werden, beispielsweise in den rasant wachsenden Märkten der BRIC-Länder: Im Jahr 1855 gründeten wir unsere erste Tochtergesellschaft in Russland; im Jahr 1904 eröffneten wir unsere erste dauerhafte Präsenz in China; [...]. (Siemens GB 2010)

---

<sup>443</sup> Vgl. dazu: „Im Fokus unserer internationalen Aktivitäten stehen die Wachstumsregionen Osteuropas und Asiens.“ (Metro Corporate Principles).



LUFTHANSA sowie LINDE referieren dagegen auf einen spezifischen, für die Unternehmensaktivitäten bedeutsamen KONTINENT (AFRIKA):

Kontinent mit Potenzial // Afrika weist weltweit mit das stärkste Luftverkehrswachstum auf. Wir sind bestens gerüstet, um daran teilzuhaben. (Lufthansa GB 2010)

LINDE bindet sein Interesse an AFRIKA auch an soziale Motive zurück:

Afrika braucht starke soziale Strukturen. Linde will dazu einen Beitrag leisten. (Linde GB 2010)

Die Belege zeigen somit an, dass bestimmte REGIONEN, LÄNDER/STAATEN, KONTINENTE für die DAX-30-Unternehmen (als ›Wachstumsträger‹: ‚Afrika‘, ‚Brasilien‘, ‚Indien‘ etc.) bedeutsam sind, da sie ein hohes Wachstumspotential besitzen, was die Verknüpfungen mit WACHSTUM durch die Verbindungen *wachsend\*/aufstrebend\* + Märkte\** oder *überdurchschnittliche\*/große\* + Wachstum*<sup>444</sup> angeben. Gleichzeitig perspektivieren die untersuchten Unternehmen diese REGIONEN, LÄNDER/STAATEN, KONTINENTE als antagonistisch zu den INDUSTRIELÄNDERN (*OECD-Staaten, Industrieländer*). Diese Identitätszuweisung durch Differenz (›Wachstumsländer stehen antagonistisch zu Industrieländern‹) wird wiederum begleitet durch Verweise auf die steigende ökonomische Macht dieser (s.o):

Erdgas ist damit bereits jetzt eine Welthandelsware – ähnlich wie Steinkohle oder Erdöl, die schon immer im globalen Maßstab gehandelt wurden. Getrieben wird diese Entwicklung auch vom Rohstoffhunger der aufstrebenden Märkte, vor allem Chinas. (E.ON Cleaner and better energy)

Dagegen dient das Konzept ›Gleichordnung verschiedener Länder‹ der Akkumulation von LÄNDERN/STAATEN, die dem Unternehmen als Nachweis von INTERNATIONALITÄT dienen (→ 8.2.3.2):

Die Eisenbahn erlebt eine Renaissance. In China, Indien, Brasilien, am Arabischen Golf, in Europa und sogar in den USA entstehen gewaltige neue Strecken. 30.000 Kilometer Schienen sind derzeit weltweit geplant oder im Bau. (Infineon GB 2010)

Ob Deutschland, Kroatien, die Slowakei oder Ungarn: Die kundenorientierte Integration unserer Festnetz- und Mobilfunk-Aktivitäten schreitet rasch und gezielt voran. (Telekom GB 2010)

Jedoch wirkt das häufig auftauchende Syntagma *in (mehr als/über) x Länder\** diesbezüglich vage und formelhaft:

Unser Netzwerk umspannt mehr als 220 Länder und Territorien, in denen rund 100.000 Mitarbeiter über 2,8 Millionen Kunden bedienen. Kunden können Sendungen, die wir garantiert vor 12 Uhr zustellen, in 675 Städte der Welt verschicken. (Deutsche Post GB 2010)

Das Unternehmen mit Sitz in Wien, Österreich hat seit seiner Gründung im Jahr 1982 in über 60 Ländern rund 500 Gesundheitsprojekte erfolgreich realisiert. (Fresenius Auf einen Blick 2011)

Durch diese Syntagmen ist die zugrunde liegende Idee der Legitimationssuche der Unternehmen durch spatiale Ausdehnung offensichtlich, was wiederum auf das Konzept ›Quantität als Legitimationsquelle‹ hindeutet. Teilweise werden auch LÄNDER bzw. KONTINENTE als BEI-

---

<sup>444</sup> Vgl. dazu: „Darüber hinaus glauben wir, dass uns unsere Präsenz in rund 190 Ländern in eine sehr gute Ausgangsposition versetzt, die uns hilft, an dem überdurchschnittlichen Wachstum der Schwellenländer zu partizipieren.“ (Siemens GB 2010).

SPIELE (→ 8.2.3.3) herausgegriffen, die als TEIL für das GANZE (INTERNATIONALITÄT des Unternehmens) stehen:

Im Jahr 2010 konnten wir unser 30-jähriges Bestehen in Katar und sogar unser 35-jähriges Jubiläum im Libanon feiern – zwei Belege für unsere Pionierleistung. (Deutsche Post GB 2010)

Bei dieser Strategie sind besonders die Automobilisten dominant: Bei DAIMLER etwa steht ein FAHRZEUGTYP immer metonymisch für ein LAND bzw. einen KONTINENT, was metasprachlich (*Synonym*) angedeutet wird:

Thomas Built Buses ist Synonym für die sichersten Schulbusse Nordamerikas. (Daimler Das Unternehmen 2011)

Die Automobilisten beziehen sich ebenfalls punktuell auf BALLUNGSRÄUME/STÄDTE (*Stadt*, *Metropole\**, *\*city*) und koppeln diese an ihre PRODUKTE, MARKEN bzw. an das gesamte UNTERNEHMEN:

Der neue smart fortwo electric drive elektrisiert die Metropolen Europas. Bereits 2007 hatte eine erste Flotte in London für Aufsehen gesorgt. (Daimler GB 2010)

Nicht umsonst nennt Vw die Stadt WOLFSBURG auch *VW City* bzw. *AutoStadt* im Text *Zahlen.Daten.Fakten* (>deutsche Städte<); andere Unternehmen nutzen ebenfalls Terminologisierung dieser Art:

Mit der T-City Friedrichshafen entsteht bis zum Jahr 2012 eine Stadt, die beispielhaft für die Lebens- und Standortqualität der Zukunft ist. Auf Basis einer modernsten Infrastruktur im Festnetz und Mobilfunk werden zahlreiche Innovationen – von der Betreuung herzkranker Menschen bis hin zur Stromzählerfernablesung über das Netz – erprobt. (Telekom GB 2010)

Es geht hier somit um ORTE unternehmerischer Existenz, die durch die engere Lokalisierung mittels spezifischen Bezeichnungen und Beziehungssignalen (*VW City*, *T-City*) aufgeladen werden. Dagegen wurden REGIONEN, LÄNDER/STAATEN, KONTINENTE auch als mögliche Differenzinstanzen verwendet, woraus UNTERNEHMENSIDENTITÄT durch Alterität entsteht. Diese Lokalisierung kann weiter ausgestaltet werden, was das nächste Kapitel offenbart.

### 1.2.13.6 STANDORTE

Die Lokalisierung<sup>445</sup> von UNTERNEHMENSIDENTITÄT kann so weit gehen, dass Unternehmen ihre STANDORTE (PRODUKTIONS-, FORSCHUNGS- oder ABBAUSTÄTTEN) sprachlich als besondere ORTE inszenieren, die lokale kulturgeschichtliche Ankerpunkte bei Anspruchsgruppen (kognitiv) aufrufen (s.o. >deutsche Standorte< ‚langjähriges Bestehen und spezifische Kultur‘).

---

<sup>445</sup> Metareflektierend kann auf diese >Lokalisierung< Bezug genommen werden: „Stärkere Lokalisierung durch die Erschließung neuer Märkte. Die neuen Fertigungsstandorte in Indien, Russland und den USA eröffnen der Konzern-Beschaffung zahlreiche Chancen. Zum einen können wir durch die Lokalisierung – die Nutzung lokaler Märkte für die lokale Fertigung – Kosten reduzieren. Zum anderen sind die örtlichen Lieferanten auch für unsere Produktionsstätten in anderen Regionen eine potenzielle Bezugsquelle. Mithilfe der sogenannten Tiefenlokalisierung erhöhen wir den Wertschöpfungsanteil von vor Ort bezogenen Bauteilen, indem wir frühzeitig günstige Bezugsquellen für Rohmaterialien in den jeweiligen Regionen suchen [...]“. (VW GB 2010).

Dadurch wird sprachlich Nähe erzeugt.<sup>446</sup> Im Korpus zeigt sich diesbezüglich das Syntagma *lokal\* + X* (Substantiv), das häufig in Kookkurrenz mit *Länder\**, *Staaten* oder Eigennamen auftritt. Es handelt sich dabei meist um die ›Lokalitätsträger‹ ‚Produktion‘, ‚Institutionen‘ und ‚Personengruppen‘:

Im Rahmen seiner Wachstumsstrategie 2018 vereinbart Volkswagen in Kuala Lumpur mit DRB Hicom eine lokale Fahrzeugmontage zur Erschließung des malaysischen Automobilmarktes. In Pekan soll ab Ende 2011 der Passat montiert werden; für Ende 2012 ist eine zweite Ausbaustufe geplant, um Volkswagen Jetta und Passat in einer lokalen Volfertigung zu produzieren. (VW Zahlen.Daten.Fakten)

Mit der Beschäftigung lokaler Mitarbeiter und der Beauftragung lokaler Lieferanten und Dienstleister trägt HeidelbergCement zur Wertschöpfung an den Standorten bei. Durch Löhne, Investitionen, Einkäufe und Steuern fördern wir dort die wirtschaftliche Entwicklung. (HeidelbergCement GB 2010)

Eine Ausweitung erfährt *lokal\** semantisch durch *regional*:

Die regionale Verbreitung unseres erfolgreichen Produktportfolios ist ebenfalls ein zentrales Thema unserer Entwicklungsarbeit. (Fresenius GB 2010)

Beide Ausdrücke – *lokal\** sowie *regional\** – verweisen auf den Umstand der räumlich begrenzten Disposition und der damit vorgenommenen räumlichen Differenzierung, was DAIMLER metareflektierend aussagt (*Differenzierung, regional*):

In allen Geschäftsfeldern erweitern wir unser Produktportfolio, um die stärkere Differenzierung innerhalb der Kundensegmente und regional unterschiedliche Bedürfnisse zu adressieren. (Daimler GB 2010)

Die Metaphorik des ORTES ist dabei charakteristisch für die Darstellung von UNTERNEHMENS-IDENTITÄT, um kulturgeschichtliche Aspekte dominant zu setzen oder bestimmte EREIGNISSE daran zu koppeln, was bereits im Kapitel zu Spezifische Zeit- und Raummythen<sup>447</sup> dargelegt wurde. Solches manifestiert sich auch häufig unter Nutzung des Ausdrucks *Standort\** (816x; *Keyword*) in Kookkurrenz mit einem Toponym (›deutsche Standorte‹), um die Sachverhalte TRADITION und DEUTSCHER STANDORT zu verknüpfen (→ dieser Anhang, 1.13.3):

Essen Deutschland. ThyssenKrupp kehrt an einen traditionsreichen Standort zurück: Mit einer neuen Hauptverwaltung, die Unternehmenskultur umsetzt. (ThyssenKrupp GB 2010)

Im Februar 2010 konnten wir ein besonderes Jubiläum feiern: Am Standort Wolfsburg wurde das 37-millionste Fahrzeug gefertigt – ein Golf GTI. (VW GB 2010)

Auf der Text-Bild-Ebene finden sich diverse Bildzeichen von */Standorte/*, die mit Bildtiteln versehen werden, wobei es sich meist um aktuelle Aufnahmen handelt:

---

<sup>446</sup> Vgl. zum Aufbau von Nähe auch: „Damit die Menschen auch in direkten Kontakt mit unseren Energieexperten treten können, haben wir die Energy Fit Experience gestartet, eine Roadshow, die in zahlreichen Städten des Landes haltmacht. So haben die Kunden die Möglichkeit, persönlich unseren Energieexperten ihre Fragen zu stellen und kostenlose Anregungen zur Verbesserung ihrer Energie-Fitness zu bekommen. Davon profitieren nicht nur die Menschen vor Ort, sondern auch wir, indem wir unseren Kunden zuhören und so eine noch engere Bindung zu ihnen aufbauen.“ (E.ON Cleaner and better energy).

<sup>447</sup> Vgl. dazu Spezifische Zeit- und Raummythen (→ 8.2.3.5.5.3).

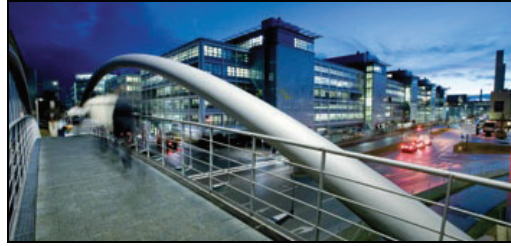

Abbildung 112 - Der Forschungsstandort Mercedes-Benz Technology Center in Sindelfingen: Tests am Fahrsimulator und im Klimakanal (Daimler Das Unternehmen 2011)

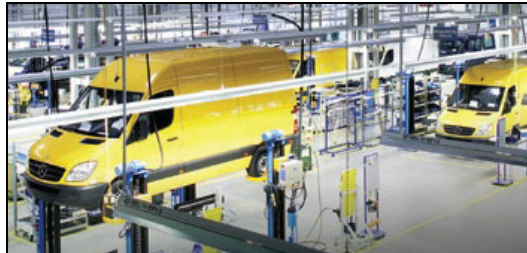

Abbildung 113 - Nutzfahrzeuge mit alternativen Antriebssystemen im Kompetenzcenter für emissionsfreie Mobilität (KEM) im Werk Mannheim (Daimler Das Unternehmen 2011)

Weitere unternehmensspezifische ORTE, die lexikalisch in Kookkurrenz mit Toponymen aufgerufen werden, sind:

- WERKE;

Für unsere Werke in Ghana haben wir einen völlig neuen Kompositzement auf Basis von Dolomit entwickelt. (HeidelbergCement GB 2010)

- PRODUKTIONS- UND FERTIGUNGSSTÄTTEN (v.a. bei den Automobilisten);

Ab dem ersten Quartal 2011 betreibt der Konzern in 15 Ländern Europas und in sieben Ländern Amerikas, Asiens und Afrikas 62 Fertigungsstätten. (VW Zahlen.Daten.Fakten)

- FABRIKEN;

Insgesamt wurde der Standort Deutschland im europäischen Produktionskonzept aufgewertet. So haben wir in Düsseldorf eine neue Fabrik zur Herstellung von flüssigen Wasch- und Reinigungsmitteln in Betrieb genommen, die die Märkte in Deutschland, Benelux und der Schweiz versorgt. (Henkel GB 2010)

(Unternehmensspezifische) ORTE, auf die insgesamt seltener referiert wird, sind KRAFTWERKE<sup>448</sup> oder LAGER-/FÖRDERSTÄTTEN<sup>449</sup>:

Auf Basis unserer einzigartigen Kali- und Magnesiumlagerstätten bieten wir unseren Kunden eine Produktpalette, die in dieser Vielfalt von keinem anderen Kaliproduzenten weltweit angeboten wird. (K+S GB 2010)

Während der Beleg von K+S den LAGERSTÄTTEN explizit das Attribut ‚einzigartig‘ zuschreibt und damit auf UNTERNEHMENSIDENTITÄT rückverweist, werden mit den folgenden Lexemen ORTE ausdrucksseitig direkt mit dem Unternehmensnamen verknüpft, um durch diese Beset-

<sup>448</sup> Vgl. dazu: „Neues Kraftwerk in Shatura: Für effiziente und klimafreundliche Energie in Russland.“ (E.ON Cleaner and better energy).

<sup>449</sup> Vgl. dazu: „Unsere Produktionsstandorte liegen – bedingt durch die Lagerstätten der Geschäftsbereiche Kali- und Magnesiumprodukte sowie Salz – in Europa, insbesondere in Deutschland, in Südamerika sowie in den USA und Kanada.“ (K+S GB 2010); „Wir verfügen außerdem über ein dichtes Netz an Förderstätten für Zuschlagstoffe und Produktionsanlagen für Transportbeton.“ (HeidelbergCement GB 2010).

zung lokal IDENTITÄT herzustellen, z.B. durch *ThyssenKrupp Quartier*<sup>450</sup> oder *Henkel-Zentrale*<sup>451</sup>. Beim Sachverhalt STANDORT fällt zuletzt auch die regelhafte Verknüpfung mit den Sachverhalten VERANTWORTUNG und GESELLSCHAFT auf (→ dieser Anhang, 1.5.4), was besonders RWE, K+S und THYSSENKRUPP nutzen:

Mit jedem unserer weltweiten Standorte setzen wir bewusst – über die wirtschaftliche Bedeutung für das Unternehmen hinaus – fördernde Impulse für die umgebende Region, deren Menschen und die Umwelt. Neben der Schaffung von direkten und indirekten Arbeitsplätzen zählt dazu vor allem die wirtschaftliche Stärkung ganzer Gebiete. Zudem trägt ThyssenKrupp aktiv dazu bei, die Lebenssituation der Menschen vor Ort durch konkretes Engagement zu verbessern. (ThyssenKrupp GB 2010)

K+S ist ein engagierter Förderer des Sports. Wir rüsten den Nachwuchs in den Sportvereinen im Umfeld unserer Standorte mit Sportbekleidung aus – ein sichtbares Zeichen der Verbundenheit von K+S mit den Gemeinden, aus denen unsere Mitarbeiter stammen. (K+S GB 2010)

Laut Klaußen (1999, 201) dient diese Darstellung der Unternehmen als verantwortungsvoller ‚Partner‘ bzw. ‚Verbündeter‘ (*Verbundenheit*) an den STANDORTEN der Konstruktion von UNTERNEHMENSIDENTITÄT, was RWE durch das Syntagma *Ausbau der regionalen Identität* explizit zum Ausdruck bringt:

Ein weiterer Förderschwerpunkt unserer Konzerngesellschaften liegt im Bereich Sport, insbesondere dem Sponsoring regionaler Jugend- und Amateurmansschaften. Damit leisten wir einen wesentlichen Beitrag zum Ausbau der regionalen Identität. (RWE Unsere Verantwortung 2010)

Zugleich dient diese REGIONALE IDENTITÄT der Identifikation der REGION mit dem UNTERNEHMEN (d.h. mit dessen unternehmerischen Handeln vor Ort<sup>452</sup>). Dieser reziproke Beziehungsaustausch wird ebenfalls bei RWE thematisiert:

Regionale Wertschöpfung. Insgesamt hat RWE im Jahr 2010 eine Wertschöpfung von 15,6 Mrd. € erwirtschaftet. Mehr als die Hälfte davon floss in Form von Gehältern und Sozialabgaben sowie Steuern und sonstigen Abgaben an den Staat und die Gesellschaft. Vieles davon verbleibt in den Regionen, in denen wir tätig sind. Sowohl mit dem Betrieb als auch mit dem Bau unserer Anlagen geben wir als Auftraggeber wichtige Impulse für die regionale Wirtschaft. (RWE Unsere Verantwortung 2010)

RWE befindet sich daher in Rolle ‚Nachbar‘ (*guter Nachbar*) (→ dieser Anhang, 1.5.4) was wiederum die Konzepte ›Verantwortung‹ bzw. ›Fürsorge‹ mitaufruft und vielfach diskursiv aufgenommen wird:

Nachbarn. Die gute Nachbarschaft mit den Standortgemeinden ist uns sehr wichtig. Daher pflegen wir einen offenen, konstruktiven Dialog mit den Mandatsträgern auf Kommunal-, Landes- und Bundesebene. Wir sind uns unserer Verantwortung als Arbeitgeber in zum Teil strukturschwachen Regionen bewusst. (K+S GB 2010)

Oft erscheint die Beziehung zwischen UNTERNEHMEN und NACHBARN jedoch recht einseitig, wenn Ausdrücke wie *fördern*, *Nutzen* oder *Mehrwert für die Region* (= Nutzenprinzip) auftauchen, welche die Unternehmensperspektive dominant setzen:

---

<sup>450</sup> Vgl. dazu das *ThyssenKrupp Quartier* im THYSSENKRUPP Geschäftsbericht 2010.

<sup>451</sup> Vgl. dazu: „Feierliche Einweihung der Henkel-Zentrale für das nordamerikanische Konsumenten-Geschäft im März 2009 in Scottsdale, Arizona, USA.“ (Henkel GB 2010).

<sup>452</sup> *Vor Ort* taucht oft in Konkurrenz mit *Kunden\*/Stakeholder\** auf: „Zu bewahren gilt es unser vor Ort gelebtes Unternehmertum, [...]“ (Merck Einzigartig – Der Merck Weg).



#### MEHRWERT FÜR DIE REGION

Das ThyssenKrupp Stahlwerk in Santa Cruz war die größte Privatinvestition der letzten zehn Jahre in Brasilien. Das Werk bringt Wohlstand und nachhaltiges wirtschaftliches Wachstum in die Region. Auch die Bevölkerung in der Nachbarschaft zieht daraus großen Nutzen. Denn ThyssenKrupp fördert das Gemeinwesen in vielfältiger Form, beispielsweise durch Unterstützung von Feuerwehr, medizinischer Versorgung, Bildungseinrichtungen und Universitäten. Den künftig 3.500 Beschäftigten werden umfassende Möglichkeiten zur Weiterbildung und beruflichen Entwicklung geboten. So schafft die Einrichtung einer technischen Akademie in der Gemeinde Itaguaí mit Ausbildungsprogrammen neue Perspektiven für junge Menschen. Daneben kooperiert das Unternehmen mit Universitäten und fördert den Austausch von Know-how zwischen Studenten und Praktikern. Für Kinder und Jugendliche hat ThyssenKrupp im Sommer 2010 das Fußballprojekt Copa Social CSA ins Leben gerufen. Über den Sport soll das dreimonatige Projekt Selbstbewusstsein, Teamgeist und Verantwortung für die Gemeinschaft stärken.

Abbildung 114 - ThyssenKrupp GB 2010

THYSSENKRUPP konzeptualisiert sich in diesem Textauszug als überlegener ‚Mäzen‘<sup>453</sup> durch die Hervorhebung seines sozialen, kulturellen und sportlichen Engagements sowie der Arbeitsplatzschaffung (→ 8.2.4.1.4). Dass Unternehmen jedoch auch von der Region vor dem Hintergrund der notwendigen Gewinnorientierung sowie hinsichtlich struktureller Rahmenbedingungen (Genehmigungsverfahren, Bodennutzung) abhängig sind (vgl. Klauen 1999, 173f.), wird nicht erwähnt, zumal aufgrund solcher Faktoren das *ThyssenKrupp Stahlwerk in Santa Cruz* überhaupt erst gebaut werden konnte.

#### 1.2.13.7 Fazit: ORTE

Folgendes Fazit kann für das Kapitel ORTE gezogen werden: Mittels sprachlicher Prozesse können aus RÄUMEN konkrete ORTE für die Konstruktion von UNTERNEHMENSIDENTITÄT erschaffen werden, die sich zwischen den Polen GLOBALITÄT (WELT/GLOBALITÄT, INTERNATIONALITÄT) und LOKALITÄT (DEUTSCHLAND, EUROPA, REGIONEN, LÄNDER/STAATEN, KONTINENTE, STANDORTE) bewegen. Im Kontext der geographischen Vernetzung müssen Unternehmen einen „Balanceakt zwischen der Anpassung an nationale Eigenheiten und weltweiter Standardisierung“ (Wiedmann 1996, 145) vollbringen.<sup>454</sup> ‚Internationalität‘ ist zwar ein allgemein anerkanntes Qualitätsmerkmal, allerdings betonen die DAX-30-Unternehmen auch die ‚Nähe‘ zu DEUTSCHLAND und EUROPA bzw. zur REGION oder zu ihren STANDORTEN. Dieser Dualismus ›global und lokal‹ ist daher ein markantes axiomatisches dichotomisches Schema des Diskurses (→ 6.5.2.5) mit teilweise verschwimmenden Grenzen<sup>455</sup>, da das Verhältnis von ‚Nähe‘ und ‚Ferne‘ auf der räumlichen Ebene durch die synchrone Existenz von verschiedenen Lebenswelten kommunikativ (z.B. durch *global und lokal*) aufgelöst wird. Das ontisch NAHE und das FERNE verschwimmen, indem Unternehmen zwischen TEIL (STANDORT und

<sup>453</sup> Vgl. dazu auch: „In den letzten zwei Jahren hat kein Investment in der Region mehr Arbeitsplätze und mehr Nutzen für die Gesellschaft geschaffen.“ (ThyssenKrupp GB 2010).

<sup>454</sup> Daraus erwächst die Fragestellung, welche auch die III. IHCW (2011) in ihrem Eingangstext formuliert: „Wie global müssen wir sein? Wie lokal müssen wir bleiben? Information, Kommunikation und wirtschaftliches Handeln in Zeiten der Globalisierung ist geprägt von diesen beiden Polen.“

<sup>455</sup> Im Spannungsfeld von Lokalität und Globalität wird auch immer wieder auf die GRENZEN-Metaphorik Bezug genommen (über regionale/nationale/territoriale Grenzen hinweg/hinaus).



sozioökonomisches Umfeld) und GANZEM (internationales UNTERNEHMEN) oszillieren und daraus eine hybride spatiale UNTERNEHMENSIDENTITÄT<sup>456</sup> konstruieren.

#### 1.2.14 UMWELT

Die UMWELT als ein weiterer umgebender RAUM des UNTERNEHMENS stellt ebenso eine zentrale Komponente in der Identitätskonstruktion dar, wie die Analyse der Repräsentationstexte im Korpus<sup>457</sup> zeigt. Die Ausdifferenzierung von UMWELT erfolgt in diesem Diskurs durch die Sachverhalte UMWELTSCHUTZ (→ dieser Anhang, 1.14.1), KLIMASCHUTZ (→ dieser Anhang, 1.14.2) und RESSOURCENSCHONUNG (→ dieser Anhang, 1.14.3).

##### 1.2.14.1 UMWELTSCHUTZ

Besonders DAIMLER erscheint in der Einzelanalyse engagiert in der Bearbeitung des Sachverhalts UMWELT(-SCHUTZ). In der Gesamtauswertung findet sich, wie bei NACHHALTIGKEIT, ebenfalls eine hohe Anzahl an substantivischen und adjektivischen Komposita mit dem Lexem *\*umwelt\** (1.699 *Hits* in den Konkordanzen), welche auf die Wichtigkeit des Themas ›Umweltschutz‹ für Unternehmen sowie auf den derzeitigen Umweltdiskurs als Subdiskurs hindeuten.<sup>458</sup> Das am meisten auftauchende Kompositum ist daher auch *Umweltschutz*.<sup>459</sup> Laut Arnold (2007) ist dieses immer noch als Hochwertwort zu werten, da der Kampf gegen ›Klimaerwärmung‹ (mit dem Hochwertwort *Klimaschutz*) zu einem adressatenwirksamen Thema geworden ist und viele Unternehmen versuchen, das traditionell grüne Hochwertwort für sich zu vereinnahmen, häufig in direkter Verbindung mit *Klimaschutz*:

Mit vielen Werkstoffen, Komponenten und Systemlösungen ist ThyssenKrupp effektiver Problemlöser und Partner seiner Kunden beim Umwelt- und Klimaschutz. Energieeffiziente Aufzüge, EnviNOx-Anlagen zur Reduzierung von Stickoxidemissionen oder hocheffizientes Elektroband für Elektromaschinen sind nur einige der vielen Innovationen. (ThyssenKrupp GB 2010)

Dass ›Umweltschutz‹ eines der wichtigsten *Thememfelder* (LINDE *Der Linde Spirit*) ist, wird metareflektierend vielfach ausgedrückt und UMWELTSCHUTZ dahingehend als Sachverhalt festgesetzt (*in Sachen Umweltschutz*):

---

<sup>456</sup> Vgl. dazu auch Hall (1994, 212): „Je mehr das gesellschaftliche Leben durch die globale Vermarktung von Stilen, Räumen und Vorstellungen, durch internationale Reisen, global vernetzte Medienbilder und Kommunikationssysteme vermittelt wird, desto mehr lösen sich Identitäten von besonderen Zeiten, Orten, Vergangenheiten und Traditionen – sie werden entbunden und erscheinen als ‘frei flottierend’.“ Laut Krone (2009, 9) entstehen diese hybriden Raumkonzepte v.a. durch die Geschwindigkeit und den Wirkungskreis des strukturellen Wandels in der Postmoderne, d.h. Oppositionen werden aufgebrochen.

<sup>457</sup> Vgl. dazu Stach/Held (2009), die in ihrer Studie als eines der drei Hauptthemen im *Leitbild* ›Gesellschaft‹ (41%), ›Kunde‹ (73%) und ›Umwelt‹ (37,5%) finden. Auch Kläßen (1999) stellt für deutsche Unternehmen eine starke Berücksichtigung des Themas ›Umwelt‹ fest.

<sup>458</sup> Schwegler (i.V.) führt eine Analyse von argumentativen Strukturen in Umweltdiskursen durch.

<sup>459</sup> Die Komposita *Umweltmanager*, *Umweltschutzgesetze* und *Umweltschutzbehörde* verweisen darüber auf die Wichtigkeit einer ›Umweltschutzregulation‹. Vgl. dazu: „Die Umwelt für die heutige und für zukünftige Generationen zu schützen und alle geltenden Umweltschutzgesetze und -richtlinien einzuhalten, ist ein Grundanliegen von Daimler.“ (Daimler Verhaltensrichtlinien).

Auch in Sachen Umweltschutz können wir Fortschritte verzeichnen: Im Berichtsjahr haben wir begonnen, unsere Flotte durch Elektro- und Hybridfahrzeuge zu ersetzen. (Deutsche Post GB 2010)

Fast alle Unternehmen betonen zudem die exponierte Stellung und Bedeutung des Sachverhalts UMWELTSCHUTZ für ihr Handeln:

Der Umweltschutz hat für Linde einen hohen Stellenwert. Dieses zeigt sich sowohl bei den eigenen Produktionsabläufen und der Entwicklung umweltfreundlicher Produkte und Technologien als auch bei der Auswahl von Projekten, die das Unternehmen in diesem Bereich fördert. (Linde GB 2010)

Auf Satz- und Textebene werden Bedeutungsfixierungen des Ausdrucks *Umweltschutz* eingeleitet, da dieser als Hochwertwort im Diskurs von jedem Akteur vereindeutigt werden will (*Umweltschutz beinhaltet/bedeutet für X Y*):

Umweltschutz beinhaltet für Siemens zwei Aspekte: Erstens geht es darum, durch unser Umweltportfolio einen wesentlichen Beitrag zum Klimaschutz zu leisten. Der zweite Aspekt betrifft die Erhöhung der Ressourceneffizienz sowie die Verminderung von Emissionen aus unserer eigenen Geschäftstätigkeit. (Siemens GB 2010)

BEIERSDORF und RWE erweitern die Begriffsbedeutung, indem sie ›Umweltschutz‹ über *klassische[r]* Tätigkeiten ausweiten, d.h. nicht nur ‚nachsorgend‘, sondern auch ‚vorsorgend‘ handeln wollen (*bereits bei der Produktentwicklung*):

Umweltschutz: Wir verstehen Umweltschutz als die gemeinsame Aufgabe aller Mitarbeiter. [...] Klassischer Umweltschutz beginnt normalerweise erst bei der Entsorgung von Abfall und der Reinigung von Abluft und Abwasser. Natürlich ist und bleibt das eine wichtige Aufgabe, der wir uns bei Beiersdorf konsequent annehmen. Aber um wirklich verantwortungsvoll zu handeln, beginnen wir mit unseren Maßnahmen bereits bei der Produktentwicklung. (BDF Nachhaltigkeitsbericht 2010)<sup>460</sup>

Beleuchtet man daneben den Kontext von *Umweltschutz*, taucht der Ausdruck oft in Syntagmen aus sequentiellen substantivischen Reihungen (*X und Y* oder *X, Y und Z*) auf; *X, Y und Z* sind dabei wiederholt *Nachhaltigkeit, Arbeitssicherheit* oder *Gesundheit*:

Die Anlagen und Verfahren der Business Area eröffnen neue Möglichkeiten für Umweltschutz und Nachhaltigkeit. (ThyssenKrupp GB 2010)<sup>461</sup>

Weitet man die Analyseperspektive auf den Satz aus, zeigt sich *Umweltschutz* seriell in Verbindung mit dem Verb (*sich*) *verpflichten/verpflichtet fühlen*, was das Konzept ›Umweltschutzhandlung‹ ‚Umweltschutzverpflichtung‘ aufruft:

Als Erfinder des Automobils fühlen wir uns dem Klima- und Umweltschutz ebenso verpflichtet wie der Sicherheit unserer Fahrzeuge. (Daimler Unternehmensinformationen 2010)<sup>462</sup>

HEIDELBERGCEMENT bezieht sich auf dieses Konzeptattribut zudem auch auf Wortebene, wenn von *Heidelberger Umweltschutzverpflichtung*<sup>463</sup> gesprochen wird und der damit konsti-

---

<sup>460</sup> Vgl. dazu: „Umweltschutz. Unsere Maßnahmen zum Umweltschutz reichen weit über die Begrenzung des CO<sub>2</sub>-Ausstoßes hinaus. Die meisten davon werden in der Öffentlichkeit kaum wahrgenommen. Sie basieren auf einer Vielzahl gesetzlicher und genehmigungsrechtlicher Vorgaben, deren Einhaltung als selbstverständlich gilt.“ (RWE GB 2010).

<sup>461</sup> Vgl. dazu auch: „Mit Engagement und Know-how legen wir so das Fundament für erfolgreichen Umweltschutz und möglichst hohe Arbeitssicherheit.“ (BDF Nachhaltigkeitsbericht 2010).

<sup>462</sup> Vgl. dazu auch (*sich*) *verpflichtet sehen*: „Die METRO GROUP sieht sich den Belangen des Umweltschutzes und dem verantwortungsvollen Ressourcenverbrauch verpflichtet.“ (Metro Corporate Principles).

tuierter Sachverhalt UMWELTSCHUTZVERPFLICHTUNG bereits lexikalisch an HEIDELBERGCEMENT gebunden wird. Neben ‚Umweltschutzverpflichtung‘ offenbart sich auch das Konzeptattribut ‚Umweltschutzverantwortung‘, indem *verantwortung\** im Kontext von *Umwelt\** auftaucht:

Verantwortungsvoller Umwelt- und Klimaschutz ist ein wichtiges Unternehmensziel für uns. Wir gehen mit den verfügbaren Ressourcen verantwortungsbewusst um und setzen uns für die Vielfalt der natürlichen Lebensgrundlagen ein. (ThyssenKrupp GB 2010)

Wie der letzte Beleg von THYSENKRUPP veranschaulicht, wird UMWELTSCHUTZ auch als *Unternehmensziel* bezeichnet (›Umweltschutz ist ein Unternehmensziel‹), was andere Aussagen bestätigen:

Seit Ende der 1980er Jahre ist Umweltschutz bei Beiersdorf verbindliches Unternehmensziel und in allen unseren Geschäftsprozessen fest integriert. (BDF Imagebroschüre)

Dennoch wird durch Formulierungen wie *Umweltschutz verbessern/vorantreiben*<sup>464</sup> oder *mehr Umweltschutz* ebenso eingeräumt, dass der UMWELTSCHUTZ ‚verbesserungswürdig‘ ist:

Die zuständigen Umweltmanager entwickeln – zum Teil gemeinsam mit externen Beratern – kurz- und langfristige lokale Strategien für mehr Umweltschutz in den Werken und Kliniken und zur Förderung des Umweltbewusstseins bei den Mitarbeitern. (FMC GB 2010)

Insgesamt perspektivierten die bisherigen Aussagen UMWELT als ‚passive und vom Unternehmen zu schützende Quelle‘. Ebenfalls das häufig auftauchende Kompositum *umweltschonend\** besitzt diesen Bedeutungsaspekt. *Umweltschonend\** bezieht sich dabei auf ‚Produkte‘, ‚Produktion‘ sowie ‚Gebäude‘:

Angesichts der Diskussion über Klimaschutz und der sich verknappenden Rohstoffe setzt Volkswagen nicht nur auf umweltschonende Produkte, sondern auch auf eine emissionsarme und umweltfreundliche Produktion. (VW GB 2010)

9km<sup>2</sup> Werksfläche. [...] 200.000 Bäume zum Erhalt biologischer Vielfalt. Eines der umweltschonendsten Stahlwerke weltweit. (ThyssenKrupp GB 2010)

Als lexikalische Varianten finden sich die Syntagmen *schonende[n] Umgang mit der Umwelt*<sup>465</sup>, *Schonung der/von Umwelt*<sup>466</sup> sowie die Verbkonstruktion *Umwelt schonen*<sup>467</sup>, wobei *Umwelt schonen* infinitivisch eine ›Absicht‹ markiert.

Entgegen dieser Perspektivierung von UMWELT als ‚passive und vom Unternehmen zu schützende Quelle‘ zeigen sich auch Aussagen, die UMWELT als ‚vom Unternehmen potentiell be-

---

<sup>463</sup> Vgl. dazu: „Die Heidelberger Umweltschutzverpflichtung. Umweltschutz besitzt besondere Bedeutung für unsere Mitarbeiter, Mitbürger und Kunden.“ (HeidelbergCement Corporate Mission).

<sup>464</sup> Vgl. dazu: „Durch aktiven Dialog mit Vertretern aus Politik, Wirtschaft, Verbänden und Wirtschaftsinitiativen treiben wir den Umwelt- und Klimaschutz weiter voran.“ (Deutsche Post GB 2010).

<sup>465</sup> Vgl. dazu: „Dem schonenden Umgang mit der Umwelt sind wir verpflichtet“ (Merck Leitbild).

<sup>466</sup> Vgl. dazu: „Die im November 2010 von der Stiftung Deutscher Nachhaltigkeitspreis e.V. verliehene Auszeichnung wird an Unternehmen vergeben, die wirtschaftlichen Erfolg mit sozialer Verantwortung und Schonung der Umwelt verbinden.“ (Daimler GB 2010).

<sup>467</sup> Vgl. dazu: „Neueste Entwicklungen im Bereich der Lackierertechnik tragen dazu bei, die Umwelt zu schonen und gleichzeitig Kosten zu reduzieren.“ (VW GB 2010).

einträchtige Quelle‘ konstituieren (→ 6.4.3). Komposita wie *Umweltvorsorge* offenbaren dies, denn *Umweltvorsorge* bedeutet, im Vergleich zu *Umweltschutz*, nicht, die UMWELT zu ‚schützen‘ bzw. zu ‚schonen‘, sondern Maßnahmen zu treffen, mit denen späteren Entwicklungen ‚entgegengewirkt‘ bzw. ‚vorgebeugt‘ werden kann. Auch die Komposita *Umwelteinflüsse*, *Umweltbelastungen* oder *Umweltverschmutzung* lassen dieses Konzeptattribut erahnen, was einer reaktiven Sicht auf den Raum UMWELT gleichkommt, indem das System UNTERNEHMEN diesen ex post von Schäden befreit:

Die internationale ISO-Norm 14001:2004 ist die weltweit bedeutendste Vorgabe dessen, was ein Umweltmanagement in einem Unternehmen beinhalten und leisten soll. Sie legt u.a. Wert darauf, dass Standorte hinsichtlich möglicher Umweltbelastungen kontinuierlich überprüft werden, etwa im Hinblick auf Emissionen und Abfälle. (Fresenius GB 2010)

Eine dritte Perspektivierung, die im Korpus auftritt, ist UMWELT als ‚neutrales System, mit dem das Unternehmen Austausch betreibt‘. Darauf beziehen sich etwa das Substantiv *Umweltfreundlichkeit* oder das Adjektiv *umweltfreundlich*\* + X (Substantiv) (>Umweltfreundlichkeitsträger<):

Wir bringen umweltfreundlichen Strom auf die Straße. (E.ON Cleaner and better energy)

Ebenso findet hierbei die Kopplung von *umelt-* und *klimafreundlich*\* statt:

Die in der Produktion verwendeten Verfahren und unsere breite Palette umwelt- und klimafreundlicher Produkte sind wichtige Beiträge zur Zukunftsfähigkeit des Konzerns und zur Lösung globaler Herausforderungen. (ThyssenKrupp GB 2010)<sup>468</sup>

Die Konstruktionen *umweltfreundlich*\* + *Verkehr/Mobilität/Fahren* ähneln (semantisch) den Konstruktionen mit *nachhaltig*\* + X (→ dieser Anhang, 1.5.3):

Es gibt nicht die eine Lösung für umweltfreundliche Mobilität. Das gesamte Antriebsspektrum technologisch und wirtschaftlich zu beherrschen, wird zum Erfolgsfaktor. (VW GB 2010) N

Schließlich wird *umweltfreundlich*\* auch an die Ausdrücke *Produktion* oder *te*<sup>469</sup>(,Wertschöpfungskette‘) gebunden:

Angesichts der Diskussion über Klimaschutz und der sich verknappenden Rohstoffe setzt Volkswagen nicht nur auf umweltschonende Produkte, sondern auch auf eine emissionsarme und umweltfreundliche Produktion. (VW GB 2010)

Der folgende Beleg in leichter Variation des aufgezeigten Musters präsupponiert jedoch, dass das Merkmal ‚umweltfreundlich‘ im Ermessen des Unternehmens liegt oder in der Einschätzung, was ein Unternehmen als *möglich* erachtet:

Das Unternehmen will seine Produktion eben so umweltfreundlich und energieeffizient wie möglich gestalten. (Linde GB 2010)

---

<sup>468</sup> Vgl. dazu auch: „Auch in Zukunft will der Volkswagen Konzern mithilfe innovativer und umweltfreundlicher Technologien eine Vorreiterrolle bei der nachhaltigen Mobilität einnehmen.“ (VW GB 2010).

<sup>469</sup> Vgl. dazu: „Gleichzeitig haben wir ein entsprechendes Programm für unsere Lieferanten gestartet, denn wir wollen das weltweit erste Industrieunternehmen mit einer durchgehend umweltfreundlichen Lieferkette sein.“ (Siemens GB 2010).

Neben dem Adverb *möglich*, das in der Aussage von LINDE als abschwächende Partikel fungiert, präsupponiert auch die Verwendung der vielen Komparative (*umweltfreundlicher*), dass noch kein Idealzustand der UMWELTFREUNDLICHKEIT vorliegt bzw. das Optimierungsstreben der Unternehmen auch hier angesetzt wird. FRESenius MEDICAL CARE formuliert dies:

Wir befassen uns zunehmend mit der Frage, wie Fresenius Medical Care seine Erzeugnisse und Verfahren umweltfreundlicher gestalten kann. Das Ziel ist dabei, den Kunden Mehrwert zu bieten, indem wir ihnen helfen, Kosten einzusparen oder Umweltauflagen leichter zu erfüllen. (FMC GB 2010)

Ein weiteres Kompositum, welches UMWELT als ‚neutrales System, mit dem das Unternehmen Austausch betreibt‘ perspektiviert, ist *Umweltverträglichkeit*. Vor allem DAIMLER und E.ON verwenden das Adjektivkompositum *umweltverträglich*\* + X (Substantiv) in Bezug auf die ›Umweltverträglichkeitsträger‹ ‚Auto‘, ‚Antrieb‘ und ‚Energie‘<sup>470</sup>, wobei E.ON versucht, die Bedeutung des Komparativs *umweltverträglicher* festzusetzen:

Umweltverträglicher bedeutet dabei, Energie effizienter zu verwenden und Ressourcen zu schonen. (E.ON Cleaner and better energy)<sup>471</sup>

Weitere adjektivische Komposita, die sich auf UMWELT als ‚neutrales System, mit dem das Unternehmen Austausch betreibt‘ beziehen, sind *umweltrelevant*\*<sup>472</sup> und *umweltorientiert*\*<sup>473</sup>. Diese setzen durch die Morpheme *\*relevant* und *\*orientiert* noch stärker den systemischen Charakter des Austauschs zwischen UNTERNEHMEN und UMWELT dominant. Diese Perspektivierung wird auch durch ein Feld an substantivischen Komposita, welche ökonomische Formationen metaphorisch auf die UMWELT übertragen, offenbar (*Umwelteffizienz*, *Umweltziele*, *Umweltbilanz*, *Umweltdatenbank*, *Umweltmanagement*<sup>474</sup>). Teilweise sind diese Lexeme bereits Teil wirtschaftlicher Fachlexik bzw. in fachsprachliche Ausführungen eingebunden, was im folgenden Beleg bei LUFTHANSA deutlich wird:

Mit Hilfe der umfassenden Umweltdatenbank werden alle sich auf die Umwelt auswirkenden betrieblichen Vorgänge und Tätigkeiten im Lufthansa Konzern systematisch erfasst, dokumentiert und bewertet. So können wir unsere Leistungen und den Erfolg unserer Bestrebungen für den Klima- und Umweltschutz anhand diverser Schlüsselkennzahlen messen. (Lufthansa GB 2010)

---

<sup>470</sup> Vgl. dazu: „Sämtliche Aktivitäten im Bereich Forschung und Entwicklung müssen sich an ihrem Beitrag zu einer umwelt- und klimaverträglichen Energieversorgung messen lassen.“ (E.ON Cleaner and better energy).

<sup>471</sup> Vgl. dazu auch: „Um unsere Aktivitäten auf See so umweltverträglich wie möglich zu gestalten, haben wir im Dezember 2008 eine Forschungskooperation mit der International Union for Conservation of Nature and Natural Resources (IUCN) abgeschlossen [...]“. (E.ON Cleaner and better energy).

<sup>472</sup> Vgl. dazu: „Die für umweltrelevante Anlagen und Tätigkeiten zuständigen Mitarbeiter sind sich ihrer besonderen Verantwortung bei der Einhaltung des Umweltrechts bewusst.“ (BMW Verhaltenskodex).

<sup>473</sup> Vgl. dazu: „Unsere Unternehmenskultur fußt unter anderem auf einer umweltorientierten Unternehmensführung. [...]“. (VW GB 2010).

<sup>474</sup> Vgl. dazu: „Nur mit einer Kombination aus unterschiedlichsten Maßnahmen, etwa einer kontinuierlichen Flottenerneuerung, operativer Maßnahmen wie Triebwerkswäsche oder dem Einsatz von leichteren Materialien und einer verbesserten Infrastruktur, wird es gelingen, die ambitionierten Umweltziele zu erreichen.“ (Lufthansa GB 2010); „Dem vom TÜV Nord zertifizierten Prädikat liegt die Umweltbilanz zugrunde, die den gesamten Lebenszyklus eines Produkts [...] berücksichtigt.“ (VW GB 2010).



Insbesondere der Ausdruck *Umweltmanagement*\* wird vielfach zur Systematisierung von Unternehmenstätigkeiten in Bezug auf UMWELT gebraucht:

UMWELTMANAGEMENT IM KONZERN. Unsere Unternehmenskultur fußt unter anderem auf einer umweltorientierten Unternehmensführung. (VW GB 2010)

Wir betrachten umweltschonendes Arbeiten als zentrales Qualitätsmerkmal. In Deutschland arbeiten wir deshalb im Brief- und Paketbereich mit einem vom TÜV Nord zertifizierten Umweltmanagementsystem. (Deutsche Post GB 2010)

Damit einhergehend erfolgt auch die Zuschreibung von ‚Kompetitivität‘ an das System UMWELT (z.B. *Umweltportfolio*, *Umweltpreis*, *Environmental Leadership Award*) (>kompetitive Umweltschutzmesseinheiten<):

Wir wollen das Potenzial des integrierten Technologiekonzerns voll ausschöpfen – beispielsweise indem wir unser Umweltportfolio und den damit erwirtschafteten Gewinn stetig ausbauen, unser hoch diversifiziertes Servicegeschäft beständig erweitern. (Siemens GB 2010)<sup>475</sup>

Markant ist in diesem Zusammenhang die unternehmensspezifische Perspektivierung von UMWELT bei K+S, da hierbei das Attribut ‚neutrales System, mit dem das Unternehmen Austausch betreibt‘ semantisch erweitert wird: UMWELT wird mithilfe des Konzeptattributs ‚vom Unternehmen bearbeitbare Quelle‘ konstituiert, d.h. UMWELT ist dem System UNTERNEHMEN (WIRTSCHAFT) untergeordnet. K+S zeigt dieses etwa auf der Satzebene durch die Konstruktion *nutzbar machen*, gepaart mit Metaphern (*Reichtum der Erde*, *Natur*, *Schätze* etc.), welche andere Aspekte (z.B. ‚Ressourcenknappheit‘) ausblenden, an:

Wir machen den Reichtum der Natur für uns alle nutzbar. (K+S GB 2010)<sup>476</sup>

Natürlich ist diese Konzeptualisierung auch durch die *Natur* des Geschäfts von K+S bedingt, denn das Unternehmen erzielt Gewinne damit, natürliche ROHSTOFFE abzubauen und weiterzuverarbeiten. Die Pronominalstruktur im Beispiel (*uns alle*) verweist zudem auf einen generellen gesellschaftlichen Nutzenbeitrag, den K+S durch den ROHSTOFFABBAU schaffen will. Dass dieser durchaus auf Strukturen der UMWELT einwirkt, wird offen eingeräumt:

Wir sind uns bewusst, dass der Flächenverbrauch und die salzhaltigen Abwässer, die durch Niederschläge auf die Halden entstehen, Eingriffe in die Natur und das Landschaftsbild sind. (K+S GB 2010)

Diese Aussage reflektiert auch die Tatsache, dass wirtschaftliches Handeln per se immer Auswirkungen auf umgebende Systeme hat. Der Verbrauch von RESSOURCEN (*Flächenverbrauch*) oder die Erzeugung von EMISSIONEN (*salzhaltigen Abwässer*) verändern das System UMWELT. Dies wird präsupponiert, wenn K+S sich auf >Umweltschutzausgleichshandlungen< bezieht, welche der UMWELT kompensatorisch dienen sollen. Es handelt sich um:

---

<sup>475</sup> Vgl. dazu: „Im Geschäftsjahr 2010 hat Volkswagen zum siebten Mal den internen Umweltpreis verliehen und damit das Engagement von Mitarbeitern gewürdigt, die in ihrem Arbeitsumfeld Eigeninitiative in Sachen Umweltschutz zeigen.“ (VW GB 2010).

<sup>476</sup> Vgl. dazu auch: „Wenn die Natur die Elemente Natrium und Chlor miteinander verbindet, dann schafft sie ein neues Produkt, eine eigenständige Verbindung: Natriumchlorid. Dieses ist unverzichtbar für alles Leben auf der Erde und wird von der K+S Gruppe für uns alle nutzbar gemacht.“ (K+S GB 2010).



- ‚gezielte Maßnahmen zum Umweltschutz an anderer Stelle‘;

Eingriffe in Natur und Landschaft durch die Halden gleichen wir durch vielfältige Maßnahmen zum Naturschutz und zur Erhaltung der Artenvielfalt aus. Außerdem führen wir eine Reihe von Projekten zur Abdeckung von Rückstandshalden durch, mit dem Ziel, die Haldenwässer zu reduzieren. Bereits seit dem Jahr 1983 erforschen wir beispielsweise in Kooperation mit der Universität Kassel Begrünungsprogramme für Rückstandshalden. Nach der vollständigen Abdeckung und Begrünung kann Niederschlagswasser nicht mehr an die Rückstände gelangen und die Entstehung von salzhaltigen Haldenwässern wird vermieden. (K+S GB 2010)

- ‚Prüfung/Messung von negativen Umwelteinflüssen‘;

Gewässermonitoring belegt positiven Trend. Aktuelle Ergebnisse langjähriger Gewässeruntersuchungen bestätigen, dass sich die dynamische Verbesserung der ökologischen Bedingungen in Werra und Weser weiter fortsetzt. Sowohl bei Wasserpflanzen als auch bei Kleintieren stellten die Wissenschaftler im Vergleich zu den Vorjahren in der Werra positive Entwicklungen fest. Auch bei den Fischen ist eine Zunahme der Artenzahl und Artendichte sowie der Populationsgröße zu verzeichnen. (K+S GB 2010)

- ‚Reduzierung früherer (höherer) Belastungen von Umwelteinflüssen‘;

Unser Ziel ist es, die unvermeidbaren Eingriffe in die Natur so gering wie möglich zu halten. Wir setzen deshalb moderne Explorations- und Gewinnungsverfahren ein und entwickeln unsere Verfahrenstechnik laufend weiter. Dadurch haben wir den spezifischen Rohstoff- und Energieeinsatz in den vergangenen Jahren und Jahrzehnten kontinuierlich reduziert. (K+S GB 2010)

Das Attribut ‚vom Unternehmen bearbeitbare Quelle‘ wird in Aussagen von K+S weiter durch das Muster *x wie möglich* gestützt, da dieses das Attribut der ‚Notwendigkeit‘ hinzufügt:

Auch bei Auftausalzen ist uns der schonende und effiziente Umgang mit den Ressourcen im Sinne des Umweltschutzes wichtig. Wir meinen: So wenig wie möglich, aber so viel wie nötig – das sollte auch die Maxime bei der Anwendung von Auftausalzen sein. (K+S GB 2010)

Diese Aussage impliziert zudem einen ‚von außen auferlegten Zwang‘ (*nötig*) zur UMWELTBEARBEITUNG. Durch das sich wiederholende Syntagma *unvermeidbare Eingriffe in die Natur*<sup>477</sup> bei K+S wird diese Konzeptualisierung gefestigt:

Wir gehen sorgsam mit unseren Ressourcen um, halten unvermeidbare Eingriffe in die Natur so gering wie möglich, fördern unsere Mitarbeiter und geben jungen Menschen eine fundierte Ausbildung – damit sind wir zukunftsfähig. (K+S GB 2010)

Um Förderungen von ROHSTOFFEN weiterhin zu legitimieren, etikettiert K+S diese somit als *unvermeidbar\** und bezieht sich auf ›Umweltschutzausgleichshandlungen‹, denn durch die gesellschaftliche Sensibilisierung für den Sachverhalt UMWELT können Unternehmen, die nicht ökologisch bedacht wirtschaften (und ›Umweltfürsorge‹ kommunizieren), moralisch angreifbar und in eine negative Wettbewerbsposition gebracht werden (vgl. Kläßen 1999, 11f.), was K+S explizit thematisiert:

Auch an anderer Stelle beobachten wir, dass Unternehmen, die in Deutschland Rohstoffe abbauen, einen schweren Stand haben. (K+S GB 2010)

---

<sup>477</sup> E.ON und SIEMENS greifen die Versprachlichung *Umwelt* [...] *ersparen* auf: „Die bei unseren Kunden installierten Produkte und Systeme aus unserem Umweltportfolio haben der Umwelt im Geschäftsjahr 2010 267 Millionen Tonnen CO<sub>2</sub> erspart.“ (Siemens GB 2010); „[...] Das erspart der Umwelt unnötige CO<sub>2</sub>-Emissionen und schont die Ressourcen.“ (E.ON Cleaner and better energy). BMW legitimiert seine Eingriffe in die UMWELT durch die Betonung von ‚natürlicher Überfluss‘: „Karbon benötigt viel Energie. In Moses Lake stellt die Natur sie uns im Überfluss zur Verfügung.“ (BMW GB 2010/Strategie).

Dahingehend sind die nachstehenden Äußerungen von K+S durchaus gewagt, da UMWELTSCHUTZ hinter ROHSTOFFGEWINNUNG in der Zielhierarchie angesiedelt wird.

Die Rohstoffgewinnung sollte mit anderen Flächennutzungen und den Kategorien des Natur- und Umweltschutzes in ausgewogener Weise in Einklang stehen. In den vergangenen Jahren sahen wir in Deutschland allerdings den Zugang zu Lagerstätten durch Schutzgebietsausweisungen und Überplanung mit anderen Nutzungen behindert oder versperrt, weil insbesondere dem Naturschutz ohne ausreichende Güterabwägung der Vorrang gegenüber einer Rohstoffgewinnung eingeräumt wurde. Nun setzt sich in der Politik immer mehr die Erkenntnis durch, wie wichtig heimische Rohstoffe sind. Zum Glück: Denn um auch zukünftig aus deutschen Lagerstätten Rohstoffe gewinnen und verarbeiten zu können, bedarf es geeigneter Rahmenbedingungen! (K+S GB 2010)

K+S geht in diesem Beleg sogar soweit, die Gesetzgebung zum NATURSCHUTZ für ‚überzogen‘ (*Überplanung, ohne ausreichende Güterabwägung*) zu bewerten und beendet die Aussage mit einem impliziten Appell. Dennoch schafft sich K+S durch diese Aussagen sprachliche Alleinstellung beim Sachverhalt UMWELTSCHUTZ.

Wie die aufgeführten Belege von K+S zeigten, wird das Umweltkonzept nicht nur über Komposita mit *\*umwelt\**, sondern auch über partielle Synonyme und Metonyme evoziert (*Natur/natürlich, Landschaft, Ressourcen, grün/green, Ökologie/ökologisch* etc.). Häufig sind diese Ausdrücke auch in Kookkurrenz zu finden:

Unser Einkauf ist umweltbewusst. Um ökologische Aspekte des Einkaufs kümmern sich Mitarbeiter verschiedener Regionen und Materialgruppen in einem „Grünen Team“. Es arbeitet unter anderem daran, ökologische Kennzahlen im Beschaffungsprozess zu verankern. (Deutsche Post GB 2010)

Dabei werden bei *Natur/natürlich\** und *Ressourcen* die Bedeutungsaspekte ‚Schutz‘, ‚Sorgfalt‘ sowie ‚Rücksicht‘ durch den Kontext (*schützen, sorgsam, behutsam*) dominant gesetzt:

„Wie geht man behutsam mit Umwelt und Ressourcen um?“ Die Weltbevölkerung wächst, der Energiebedarf steigt – um dem Klimawandel erfolgreich entgegenwirken zu können, sind umweltfreundliche Technologien gefordert. (Linde GB 2010)

Die Natur als Lebensgrundlage zu schützen und mit ihren Ressourcen sorgsam umzugehen, ist ebenso Teil unserer Verantwortung. (Fresenius GB 2010)

THYSSENKRUPP greift diese Konzeptualisierung auch bildlich auf und schafft im folgenden Text-Bild-Ausschnitt eine Verknüpfung der Bildelemente */Natur/* (im Bildtitel durch *unberührter Natur*) sowie */Familie/*, wobei ›Familie‹ die Bedeutungen ‚Schutz‘, ‚Sorgfalt‘ sowie ‚Rücksicht‘ mitaktiviert:

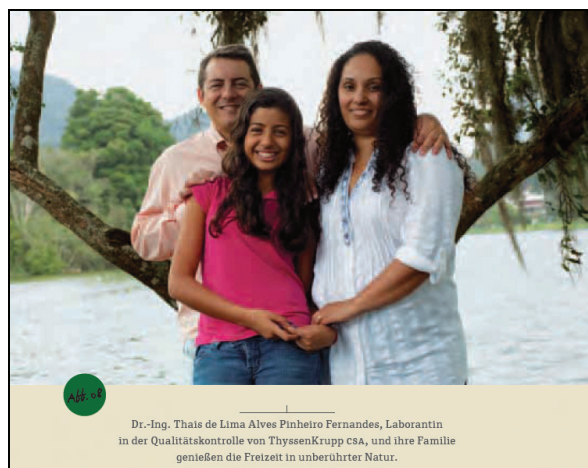

Abbildung 115 - ThyssenKrupp GB 2010

Die Ausdrücke *Ökologie* und *ökologisch* werden dagegen stärker fachsprachlich-technizistisch zur Bezugnahme auf den Sachverhalt UMWELT genutzt. Laut Deppermann (2013) gelten beide zwar als positiv konnotiert im Sinne von ‚umweltschonend‘:

Der Mercedes-Benz Citaro FuelCELL-Hybrid zeichnet sich durch sein ökologisches Konzept aus: Er fährt ohne Schadstoffemissionen und nahezu geräuschlos. (Daimler GB 2010)

In den Belegen zeigen sich jedoch häufig Verbindungen mit substantivischen Fachtermini der WIRTSCHAFT (*ökologischer Mehrwert*, *ökologisches \*management* etc.), sodass wiederum auf die Perspektivierung von UMWELT als ‚neutrales System, mit dem das Unternehmen Austausch betreibt‘ verwiesen wird. So hat sich beispielsweise der Terminus *ökologischer Fußabdruck* bereits in verschiedenen Diskursen verfestigt und wird auch hier zur positiven Bewertung des ökologischen Unternehmenshandelns gebraucht:

Wesentlich für die Bewertung der Umwelteinflüsse eines Unternehmens und Grundlage für die Ableitung von Handlungsbedarf ist dessen „ökologischer Fußabdruck“. (Infineon GB 2010)

Auffallend sind außerdem Wortbildungen mit dem Wortstamm *Öko\**, der wiederum auf Ausdrücke, die ökonomische Konzepte bezeichnen, übertragen wird (z.B. *ÖkoGlobe*<sup>478</sup> oder *Ökobilanz*<sup>479</sup>). Auf der syntagmatischen Ebene offenbart sich folgende musterhafte Trias, welche bereits im Kapitel PROFIT/GEWINN (→ dieser Anhang, 1.10.2) beschrieben wurde:

Wir agieren auf ökologischer, ökonomischer und gesellschaftlich-sozialer Ebene verantwortungsvoll im Sinne künftiger Generationen. (Siemens GB 2010)

Als letztes soll in dieser lexikalischen Übersicht auf die Adjektive *grün\*/green* eingegangen werden, der sich diverse Unternehmen (v.a. Automobil- und Energieunternehmen) bedienen.

<sup>478</sup> Vgl. dazu: „Unsere Werkstoffe und Technologien tragen dazu bei, aus ambitionierten Visionen realistische Klimaziele zu machen. Ein Beispiel ist das im September 2010 mit dem Öko Globe ausgezeichnete automobile Baukastensystem InCar.“ (ThyssenKrupp GB 2010).

<sup>479</sup> Vgl. dazu: „Im Hinblick auf die Ökologische Dimension bieten wir innovative Produkte und Lösungen an, die sowohl unsere eigene als auch die Ökobilanz unserer Kunden und Lieferanten verbessern.“ (Siemens GB 2010).

Dazu nutzen sie diese als adjektivische Metonyme zur Referenz auf UMWELTSCHUTZ (auch in der Variation *sauber\*/clean*):

Grüne Lösungen anbieten. Mit unserem GoGreen-Versand haben wir als erster Logistikdienstleister den Kunden angeboten, die durch den Transport entstehenden Emissionen mit CO2-Zertifikaten aus Klimaschutzprojekten auszugleichen. (Deutsche Post GB 2010)

Insbesondere das Syntagma *grüne Technologien* wird zahlreich genannt. Viele Unternehmen erkennen den Status der Adjektive jedoch als Metapher an und markieren diese folglich mit Anführungszeichen:

Wir werden »grüne« Innovationen fördern und das Umweltportfolio konsequent weiterentwickeln. (Siemens GB 2010)

Auf der Text-Bild-Ebene wird die Verknüpfung von ‚grün‘ (*/Rasen/*) und AUTO (*/Auto-modelle/*) vielfach deutlich:

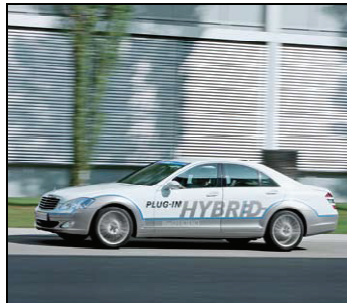

Abbildung 116 - Daimler Unternehmensinformationen 2010

Nicht nur das AUTO, sondern das gesamte UNTERNEHMEN erhält schließlich bei METRO und SIEMENS die Eigenschaftszuschreibung ‚grün‘ (*grünes Unternehmen, grüner Infrastruktur-Pionier*):

Würden Sie sagen, die METRO GROUP ist ein grünes Unternehmen? (Metro GB 2010)

Als »grüner Infrastruktur-Pionier« sind wir unter anderem Marktführer in der zukunftsweisenden Offshore-Windenergie, Produzent des Hochgeschwindigkeitszugs Velaro, einer der führenden Lieferanten effektiver und verlustarmer Stromnetze sowie Anbieter des »Energy Contracting«, eines intelligenten Finanzierungsmodells zur nachhaltigen Modernisierung von Gebäuden. (Siemens GB 2010)

Die englische Übersetzung *green* findet sich zudem in diversen Eigennamen (*Green-Qualification-Programm, The Green Ship of the Future, Go Green in Dialysis*<sup>480</sup>). Die DEUTSCHE POST erhebt „GoGreen“ auch zum *Konzernprogramm*:

---

<sup>480</sup> Vgl. dazu: „Das Green-Qualification-Programm, das Qualifizierungsmaßnahmen in umweltschonende Technologien umfasst, soll konzernweit in den nächsten drei Jahren mehr als 30.000 Mitarbeiter und Führungskräfte erreichen.“ (Daimler GB 2010); „»The Green Ship of the Future«, ein Projekt, welches 2008 von MAN Diesel & Turbo gemeinsam mit der dänischen Reederei A.P. Møller-Mærsk Group, Odense Steel Shipyard und Aalborg Industries ins Leben gerufen worden ist, hat mittlerweile 15 Partner und den International Environmental Award erhalten.“ (MAN GB 2010); „Auch Umweltinitiativen mit externen Partnern werden wir fortsetzen, zum Beispiel das Projekt „Go Green in Dialysis“.“ (FMC GB 2010). Im folgenden Beispiel wird *green* als Verb in der Verlaufsform *greening* verwendet: „Unser Projekt mit der IUCN unter dem Namen „Greening blue energy“ ist darauf ausgerichtet, ein Instrumentarium für ausgewogene, wissenschaftlich fundierte Diskussionen und begründete Entscheidungen zur umweltfreundlichen Offshore-Energienutzung zu schaffen.“ (E.ON Cleaner and better energy).

Das Konzernprogramm „GoGreen“ ist gleichsam das Dach für unsere Umweltaktivitäten. Es umfasst fünf Handlungsfelder, auf denen wir im Berichtsjahr unter anderem folgende Fortschritte erzielt haben. (Deutsche Post GB 2010)

Wie schon erwähnt, finden neben den adjektivischen Metonymen *grün\*/green* auch *sauber\*/clean* Verwendung, welche wiederum vor allem von den Automobilisten und Energieunternehmen genutzt werden (besonders im Produktbereich in Kombination mit KRAFTSTOFFE, ENERGIE und STROM):

Zudem engagieren wir uns bei der Entwicklung von sauberen und alternativen Kraftstoffen. (Daimler Unternehmensinformationen 2010)

Saubere Energie und die Reduzierung unserer spezifischen CO<sub>2</sub>-Emissionen sind dabei besonders wichtige Themen für den nachhaltigen Erfolg unseres Geschäfts. (E.ON Cleaner and better energy)

E.ON'S *Claim* bzw. Aussage *Cleaner & better energy* (E.ON *Cleaner and better energy*) nimmt *clean* phrasenhaft auf, wie auch die folgenden Phraseologismen mit *sauber\** zeigen:

Rund 50 Liter Bioethanol verbraucht der Bus auf 100 Kilometern Stadtfahrt im ständigen Wechsel von Anfahren und Abbremsen. Alles in allem eine saubere Sache. (VW GB 2010)

Sauber auf der Überholspur. Der Reisebus ist die Nummer eins in puncto Umweltschutz. (MAN GB 2010)

Nachdem nun systemlinguistische Analysen ausführlich erfolgt sind, sollen noch pragmatische Auffälligkeiten beim Sachverhalt UMWELTSCHUTZ aufgezeigt werden. Hierbei fällt auf, dass UMWELT häufig mit den Sachverhalten ERFOLG, GEWINN oder WETTBEWERB verknüpft wird (z.B. lexikalisch durch Komposita wie *Umweltmanagement*, *Faktor* oder konsekutiv mit *damit/dadurch*):

Das Umweltmanagement ist ein Faktor unseres wirtschaftlichen Erfolgs: Es trägt dazu bei, dass wir immer strenger werdende Umweltauflagen umsetzen können und unsere betrieblichen Abläufe so ressourceneffizient und damit kostensparend wie möglich gestalten. (FMC GB 2010)

UMWELT wird somit wiederum an den Bereich WIRTSCHAFT gekoppelt, was INFINEON mittels der Verbmetapher *rechnet* markiert:

Um auf die Ausgangsfrage zurückzukommen, ob sich der Einsatz der notwendigen Ressourcen zur Herstellung eines Produkts auch aus ökologischen Gesichtspunkten „*rechnet*“, lässt sich das anhand der Werte und unsere berechneten Zahlen klar belegen und für unsere Produkte bejahen. (Infineon GB 2010)

Selbst im Text *Heidelberger Umweltschutzverpflichtung* von HEIDELBERGCEMENT wird UMWELT (*Ökologie*) dem Nutzenprinzip der WIRTSCHAFT ([...] *ökonomisch ist*) untergeordnet:

Die Heidelberger Umweltschutzverpflichtung. Wir bauen auf Umweltschutz. Weil Ökologie ökonomisch ist. (HeidelbergCement Corporate Mission)

Die ökonomische Logik (Nutzenprinzip) wird soweit fortgeführt, dass UMWELT in diversen Konstruktionen selbst als ‚profitierende Quelle (unter ökonomischen Gesichtspunkten)‘ erscheint (*Vorteile/positiver Beitrag/Plus/Mehrwert für die Umwelt*)<sup>481</sup>:

---

<sup>481</sup> Vgl. dazu: „Die BASF verbindet ihren Unternehmenserfolg mit Vorteilen für Kunden, Mitarbeiter, Aktionäre und die Umwelt.“ (BASF GB 2010); „Als Technologieführer leistet MAN durch umwelt- und klimafreundliche Produkte sowie Produktionsprozesse einen positiven Beitrag für Umwelt und Gesellschaft.“ (MAN GB 2010); „Ein Plus für die Umwelt.“ (ThyssenKrupp GB 2010); „Die Summer aus der ökologischen Effizienz unserer



Durch die Ergiebigkeit des Salzes können die Streufahrzeuge außerdem länger im Einsatz bleiben. Dabei gewinnt nicht nur die Umwelt: Die Einsparung durch die geringere Menge an ausgebrachtem Salz senkt letztlich auch die Kosten für den Winterdienst. (K+S GB 2010)

Die UMWELT wird durch solche Aussagen Benefaktiv des UNTERNEHMENS bzw. dessen unternehmerischer Handlungen (›Umwelt als Nutznießer‹). In den folgenden Kapiteln sollen KLIMASCHUTZ und RESSOURCENSCHONUNG nochmals vertieft werden, da sie zentrale (subdiskursive) Aussagen zur umweltethischen Positionierung von UNTERNEHMENSIDENTITÄT weiterführen:

Klimaschutz und Ressourcenschonung sind unsere vorrangige Ziele im Umweltschutz. (HeidelbergCement Unser Unternehmensleitbild)

#### **1.2.14.2 KLIMASCHUTZ**

Die Unternehmen im Korpus schreiben sich alle, in Bezug auf UMWELTSCHUTZ, eine essenzielle Rolle beim Sachverhalt KLIMASCHUTZ zu, wobei *Klimaschutz* auch als *Keyword* auftritt:

Zudem haben wir im Jahr 2010 die Studie „Delivering Tomorrow: Zukunftstrend Nachhaltige Logistik“ veröffentlicht und dazu beigetragen, dass die maßgebliche Rolle unserer Industrie beim Klimaschutz öffentlich wahrgenommen wird. (Deutsche Post GB 2010)

Besonders RWE konzeptualisiert sich als Akteur, ohne welchen ›Klimaschutzziele‹ (*ambitionierte Klimaschutzziele*) nicht erreicht werden:

RWE hat sich ambitionierte Klimaschutzziele gesetzt. Alle Welt redet über die Bedrohung des Klimas. Das ist gut so – vorausgesetzt, dass den Worten Taten folgen. Was für jeden von uns im Kleinen gilt, trifft auf Energieversorger wie RWE im Großen zu. (RWE GB 2010)

Analog zu adjektivischen Komposita wie *umweltfreundlich\** werden die Ausdrücke *klimaschonend\**, *klimateutral\** oder *klimaverträglich\** angeführt, die meist an ›Klimaschutzträger‹ (,Produkte‘ oder ,Technologien‘) gekoppelt werden. Neben der Konstitution des Sachverhalts KLIMASCHUTZ durch das Lexem *Klimaschutz\**, findet sich auch eine große Gruppe an Aussagen, die über den Ausdruck *CO2\** operiert. Wie die Belegdurchsicht zeigt, wird dabei mittels einer negativen Konzeptualisierung durch das Konzept ›Klimaschutzbedrohung‹ ,CO2-Emissionen‘ gearbeitet (*CO2\** besitzt 543 Hits). Die referierten CO2-EMISSIONEN werden von den Unternehmen ,gemessen‘, was die Verben *erfassen/berechnen/bestimmen/ermitteln* in Kookkurrenz mit *CO2\** (*CO2-Tools*, *CO2-Effizienz*) ausdrücken:

Seit 2010 sind wir als eines der ersten Handelsunternehmen in der Lage, die Klimawirkungen unserer gesamten Transportprozesse in Deutschland, Österreich und der Schweiz zu berechnen. Dazu hat die MGL METRO GROUP Logistics zusammen mit einer Unternehmensberatung ein CO2-Tool entwickelt, mit dem sich die Kohlenstoffdioxid-Emissionen ermitteln lassen. (Metro GB 2010)

---

Fertigungen und dem ökologischen Nutzen, den unsere Produkte ermöglichen, verdeutlicht, dass Innovationen und Verantwortung für die Umwelt bei Infineon Hand in Hand gehen. Der Einsatz unserer Produkte ist damit ökologisch klug – er „rechnet“ sich für die Umwelt.“ (Infineon GB 2010).



Im Hinblick auf das zentrale Wirtschaftlichkeitskriterium der EFFIZIENZ (→ dieser Anhang, 1.10.1) wird seriell das Kompositum *CO2-Effizienz*<sup>482</sup> genutzt:

Unsere rund 470.000 Mitarbeiter weltweit können mit umweltbewusstem und damit Ressourcen schonendem Verhalten entscheidend dazu beitragen, unsere CO2-Effizienz zu verbessern. (Deutsche Post GB 2010)

Besonders bei DEUTSCHE POST, TELEKOM, E.ON und VW finden sich viele Rekurse auf das zugrunde liegende Konzept ›CO2-Effizienz‹. Meist werden diesbezüglich die Substantive *CO2-/Kohlendioxid-Emission/-Ausstoß* mit den Ausdrücken *reduzieren/Reduktion*, *senken/Senkung*, *verringern/Verringerung* oder *Minimierung/minimieren* kombiniert (,CO2-Reduktion‘):

Als weltweit führendes Logistikunternehmen ist es für uns selbstverständlich, dass wir einen Beitrag dazu leisten, CO2-Emissionen zu senken. (Deutsche Post GB 2010)

In den Belegen zeigen sich auch wiederholt Bezugnahmen auf ZAHLEN, die angeben, um wie viel Prozent eine ,CO2-Reduktion‘ stattfindet bzw. stattfand:

Die Senkung des Kohlendioxid-Ausstoßes ist ein Eckpfeiler unserer Strategie. Wir investieren jedes Jahr Milliardenbeträge, um unseren Kraftwerkspark effizienter und damit klimafreundlicher zu machen. Wo stehen wir heute? Im Jahr 2010 emittierten unsere Kraftwerke 0,73 Tonnen CO2 je erzeugter Megawattstunde Strom. Das sind 8 % weniger als im Vorjahr, aber immer noch viel zu viel. (RWE GB 2010)

Im Gegensatz zu dieser negativen Konzeptualisierung (,CO2-Reduktion‘) legt die folgende Aussage den Fokus auf das Attribut ,bereits geringer CO2-Ausstoß‘:

Der weltweite Luftverkehr erzeugt (nur) 2 Prozent aller von Menschen verursachten CO2-Emissionen. Dennoch streben wir nach Lösungen, um unseren Beitrag zum Klimaschutz zu leisten. (Lufthansa GB 2010)

Durch *nur* unterstreicht LUFTHANSA den geringen Anteil an produzierten CO2-EMISSIONEN und markiert durch *dennoch* ihren (als ,nicht notwendig‘ präsupponierten) Beitrag zur CO2-EFFIZIENZ.<sup>483</sup> Eine dritte Möglichkeit, wie Unternehmen das Konzept ›CO2-Effizienz‹ auffächern, stellt das Attribut ,CO2-Umwandlung‘ dar, wobei diesbezüglich etwa der Ausdruck *Kohlendioxid* unter positivem *Reframing* von RWE eingesetzt wird:

Kohlendioxid – vom Schadstoff zum Rohstoff

Wie können wir die Verstromung fossiler Energieträger – vor allem von Kohle – mit dem Ziel des Klimaschutzes in Einklang bringen? Eine Antwort darauf bieten Technologien, die verhindern, dass Kohlendioxid aus dem Kraftwerk in die Atmosphäre gelangt. Dazu muss das CO2 zunächst einmal isoliert werden. Hier kommen mehrere Verfahren in Betracht. Die am weitesten fortgeschrittene Technologie ist die Abscheidung des Kohlendioxids aus dem Rauchgas, das bei der Verbrennung von Kohle oder Gas entsteht; man spricht hier von „CO2-Wäsche“. Zu ihrer Erprobung haben wir am Standort Niederaußem eine

---

<sup>482</sup> Vgl. neben *CO2-Effizienz* die Ausdrücke *CO2-(Emissions-)Bilanz*, *CO2-Fußabdruck* und *CO2-Grenzwert*. Die Metapher *Fußabdruck* kommt laut Tereick (2013) in den 2000er Jahren auf und löst den Ausdruck *Treibhaus* ab. *Fußabdruck* suggeriert, dass jedes Unternehmen etwas zur Abhilfe (›CO2-Reduktion‹) tun kann.

<sup>483</sup> Vgl. dazu auch THYSSENKRUPP und SIEMENS: „ThyssenKrupp engagiert sich bei Forschungsinitiativen über zukunftsweisende Produktionsverfahren für die nächsten Jahrzehnte. Hierzu zählt neben eigenen Initiativen insbesondere die federführende Teilnahme am Projekt „Ultra Low CO2 Steelmaking“.“ (ThyssenKrupp GB 2010); „Unser Engagement und unser Erfolg auf diesem Gebiet versetzen uns schon heute in die Lage, als integrierter Technologiekonzern mit innovativen Produkten und Lösungen zu einer Gesellschaft beizutragen, die das Prädikat »Low Carbon Society« – also klimafreundlich und umweltbewusst zu sein – verdient.“ (Siemens GB 2010).

Pilotanlage gebaut. Seit 2009 testen wir dort gemeinsam mit BASF und Linde neue „CO2-Waschmittel“ für den großtechnischen Einsatz. (RWE GB 2010)

In diesem Beleg von RWE geht es u.a. um das Ein-Wort-*Reframing*, da ein Wort mit positiver Implikation (*Rohstoff*) anstelle von *Schadstoff* gesetzt wird. Diese semantische Neuausrichtung wird unterstützt durch *CO2-Wäsche* und *CO2-Waschmittel* im Textausschnitt. Ebenfalls findet das Kontext-*Reframing* (vgl. Reins 2006, 125) statt: für ein negativ beurteiltes EREIGNIS (CO2-EMISSION) wird ein neuer Kontext definiert, indem CO2 wirtschaftlich durch ABTRENNUNG, SPEICHERUNG, VERBRENNUNG oder UMWANDLUNG genutzt wird:

Ein zweites Projekt hat RWE Power im Juni 2010 zusammen mit Bayer und dem Institut für Technische und Makromolekulare Chemie der RWTH Aachen ins Leben gerufen. Hier untersuchen wir, wie sich aus CO2 Kunststoffe herstellen lassen. [...] CO2 kann so als Ausgangsstoff für Alltagsprodukte wie CDs verwendet werden. Auch dieses Projekt wird vom BMBF gefördert. (RWE GB 2010)<sup>484</sup>

### 1.2.14.3 RESSOURCENSCHONUNG

RESSOURCENSCHONUNG (*Ressourcen* besitzt *Keyword*-Status) erscheint – neben dem Sachverhalt UMWELT(-SCHUTZ) – auch in Verbindung mit WERTSCHÖPFUNGSKETTE (→ dieser Anhang, 1.7.3). Syntagmen wie *Schutz/Schonung der/von Ressourcen* oder Verbkonstruktionen (*Ressourcen (x) schützen/schonen*) evozieren dabei ›Ressourcenschonungshandlungen‹ der Unternehmen:

Mitarbeiter sollen bei ihrer Arbeit bemüht sein, die natürlichen Ressourcen zu schützen und sicherzustellen, dass gruppeneigene Aktivitäten durch Materialeinsparung, Energie sparende Planung, Bau und Betrieb von Gebäuden sowie Vermeidung, Reduzierung und Recycling von Abfällen nur einen möglichst geringen Einfluss auf die Umwelt haben. (Allianz Grundsätze nachhaltiger Entwicklung)

Es geht für die Unternehmen zunehmend um die Entwicklung von umweltfreundlichen Technologien und Verfahren, die nachhaltiges Wachstum ermöglichen, unsere endlichen Ressourcen schonen und erneuerbare Energien wirtschaftlich nutzbar machen. (Linde GB 2010)

Der Aspekt der ‚Schonung‘ ist jedoch nicht mit ‚Verzicht‘ auf RESSOURCEN (›Ressourcenverzicht‹) gleichzusetzen, was durch folgende Aussagen (mit Lexemen wie *Umgang/Einsatz* im Kotext) deutlich wird:

Neben der wirtschaftlichen und sozialen Dimension konzentriert sich Infineon Technologies besonders auf den Ausbau seines Portfolios an energieeinsparenden Lösungen sowie auf die Reduzierung von Emissionen und den schonenden Einsatz der knapper werdenden natürlichen Ressourcen bei der Produktion seiner Halbleiter. (Infineon GB 2010)

Vor allem THYSSENKRUPP markiert, dass die ‚aktive Nutzung‘ von RESSOURCEN (›Ressourcennutzung‹) mit zur Unternehmenstätigkeit (*Geschäft*) gehört:

Ein schonender Umgang mit Ressourcen und Klima ist bei ThyssenKrupp ein zentraler Bestandteil der Strategie, aber auch des täglichen Geschäfts. (ThyssenKrupp GB 2010)

---

<sup>484</sup> Vgl. dazu auch: „Wir erhöhen kontinuierlich die Wirkungsgrade neuer fossiler Kraftwerke. Zusätzlich erkunden wir industrielle Verfahren zur Abtrennung und Speicherung von CO2 („Carbon Capture and Storage“, CCS).“ (E.ON Cleaner and better energy).

›Ressourcennutzung‹ wird in Folge direkt in das Selbst-*(Bild)* des Stahlkonzerns THYSSEN-KRUPP integriert und somit unmittelbar mit UNTERNEHMENSIDENTITÄT verknüpft:

Der rücksichtsvolle Umgang mit Energie und den natürlichen Ressourcen gehört ebenso zum Bild von ThyssenKrupp wie die Produktion umweltfreundlicher Werkstoffe und Technologiesgüter. (ThyssenKrupp GB 2010)

Aspekte wie ‚Schonung‘ (*rücksichtsvoller Umgang*) dürfen dahingehend zwar in das Konzept ›Ressourcennutzung‹ integriert werden, aber ‚ökonomische Faktoren‘ (*Produktion umweltfreundlicher Werkstoffe und Technologiesgüter*) nicht behindern. K+S versucht zusätzlich, den Bedeutungsaspekt ‚Sorgfalt‘ an sich zu koppeln (in Bezug auf ABFALLENTSORGUNG<sup>485</sup>):

Da die dauerhafte lokale Entsorgung der Salzabwässer von einigen Seiten in Frage gestellt wird, kann eine langfristige Genehmigung des beschriebenen Konzepts nicht als gesichert angenommen werden. Deshalb hat sich K+S aus Gründen vorausschauender Sorgfalt entschlossen, parallel zur Umsetzung der lokalen Maßnahmen auch Genehmigungsanträge für standortferne Entsorgungswege, d.h. Fernleitungen zur Oberweser und zur Nordsee, vorzubereiten. (K+S GB 2010)

Dass K+S auf die FERNLEITUNGEN möglicherweise zukünftig angewiesen ist und nicht nur aus ‚Sorgfalt‘ gehandelt hat, wird in diesem Textausschnitt jedoch ausgespart.

Das Kapitel UMWELT zeigte infolgedessen, dass in allen Repräsentationstexten UMWELT als anderes System (neben dem UNTERNEHMEN) konstituiert wird und die umweltethische Ausrichtung des Wirtschaftens ein wesentliches Element bei der Konstruktion von UNTERNEHMENSIDENTITÄT ist. Der Sachverhalt UMWELT (mit den zwei prominenten Subdiskursen KLIMASCHUTZ und RESSOURCENSCHONUNG) dient Unternehmen dazu, eine geradezu „politische“ Position (*Umweltstrategie, Umweltmanagement*) darzulegen und gleichzeitig den gesellschaftlichen Normen und Erwartungen an ökonomisches Handeln (›Umweltschutzhandlung‹, ›Umweltschutzverpflichtung‹ etc.) gerecht zu werden, denn um sich gesellschaftlich zu legitimieren, müssen sie ihre Umweltethik kommunikativ einräumen (vgl. Spiegel/Spranz-Fogasy 2002, 221). UMWELT wurde dabei größtenteils anhand der Formate ‚passive und vom Unternehmen zu schützende Quelle‘, ‚vom Unternehmen potentiell beeinträchtigte Quelle‘ und ‚neutrales System, mit dem das Unternehmen Austausch betreibt‘ perspektiviert. Zweitens *müssen* Unternehmen, wie die Belege manifestieren, immer wieder die Umweltaspekte ihrer Produkte beschreiben (*umwelt-/klimafreundlich\**, *-verträglich\**, *-schonend\** etc.). Negative Umweltauswirkungen durch das wirtschaftliche Handeln werden daher auch nur vage angesprochen, denn gerade ‚Produkte‘ als ›Umweltschutzträger‹ sollen bei aufkommenden Sachverhalten wie KLIMAWANDEL sowie RESSOURCENSCHONUNG helfen. Daraus entsteht letztlich eine neue Art der „öko-kommunikativen Bedingungen“ (Habscheid/Müller 2012), da das Sys-

---

<sup>485</sup> Vgl. dazu auch: „Der Geschäftsbereich Entsorgung und Recycling betreibt zwei Untertagedeponien. Die dort eingelagerten Abfälle werden der Biosphäre dauerhaft entzogen – eine Leistung, die keine übertägige Deponie erbringen kann. Bei Bedarf können wir die Abfälle wieder auslagern, um die enthaltenen Wertstoffe zu recyceln.“ (K+S GB 2010).

tem UMWELT durch das UNTERNEHMEN kontrolliert wird (*ÖkoTools, Umwelteinwirkungen messen*, ›Umwelt als Nutznießer‹) und Letzteres sich dadurch systemisch erschafft.

### 1.2.15 ZEIT

Laut Jernej (2008, 162f.) sind Zeit und Zeitgefühl ein Teil des SELBST.<sup>486</sup> Im Diskurs sind es UNTERNEHMEN, die ihre Zeitordnungen repräsentieren und sprachlich Manifestationen von ZEIT anzeigen. Ihre Zeitperspektiven sind dabei immer soziokulturelle Konstrukte (vgl. Mikunda 1996, 66), denn Zeit(-wahrnehmung) ist nicht ontologisch vorgegeben, sondern wird konstruiert, indem Dinge zueinander in Beziehung gesetzt und Zeitstandards objektiviert werden (vgl. Luhmann 1985). Durch das letzte Kapitel dieser Arbeit wird aufgedeckt, welche sprachlichen Zeitordnungen dabei der Konstruktion von UNTERNEHMENSIDENTITÄT dienen. Die untersuchten Unternehmen referieren auf den Sachverhalt ZEIT erwartungsgemäß sehr häufig, um sich temporal einzuordnen. Die verschiedenen Zeitebenen (VERGANGENHEIT, GEGENWART, ZUKUNFT) werden jedoch unterschiedlich stark besetzt. Insgesamt beziehen sich die wenigsten sprachlichen Formen auf die GEGENWART, gefolgt von der VERGANGENHEIT (*lange\* Bestehen/Tradition/Erfahrung, \*geschichte, schon, damals*). ZUKUNFT (*Zukunft/Innovation, weiter, vor\**) wird am häufigsten referiert.<sup>487</sup> Lexikogrammatisch repräsentieren sich Zeitstrukturen auch im Zeitengebrauch (Präsens vs. Perfekt) sowie Verbgebrauch (z.B. *anfangen, bleiben, weitermachen*), da diese beispielsweise auf Kontinuitätsstrukturen verweisen (vgl. Delahaye 2009). In den folgenden Kapiteln werden die drei verschiedenen Zeitebenen VERGANGENHEIT (→ dieser Anhang, 1.15.1), ZUKUNFT (→ dieser Anhang, 1.15.2) und GEGENWART (→ dieser Anhang, 1.15.3) behandelt.

#### 1.2.15.1 VERGANGENHEIT (TRADITION, GESCHICHTE)

Auf VERGANGENHEIT wird vor allem durch das wiederholt auftauchende Lexem *Tradition*\*<sup>488</sup> referiert. Unternehmen generieren dadurch selbst Historizität (›Unternehmensgeschichte‹), denn TRADITION gewinnt ein Unternehmen erst durch das Bestehen über einen längeren Zeitraum hinweg. Hierdurch wird der VERGANGENHEIT eine Autorität eingeräumt, die instrumentalisiert werden kann, da der Ausdruck *Tradition* mit ‚guter Qualität‘ oder ‚Erfahrung‘ konnotiert wird, z.B. bei *Traditionsmarke* (COMMERZBANK *Die Marke der neuen Commerzbank*). LINDE bezieht sich dagegen metonymisch auf das Totum *Traditionsunternehmen*:

---

<sup>486</sup> Laut Zimbardo/Boyd (1999) bewerten Individuen kontinuierlich ihre Vergangenheit, Gegenwart und Zukunft aufgrund ihrer Erfahrungen und Erlebnisse. Daraus werden sechs Zeitperspektiven abgeleitet: ›Vergangenheit‹, ›Gegenwart‹ und ›Zukunft‹ jeweils als ‚gut‘ oder ‚schlecht‘. Die jeweilige Perspektive beeinflusst alle weiteren Handlungen, z.B. *In der Zukunft wird es keine Aufträge geben, so müssen wir jetzt nicht leistungsfähig sein.*

<sup>487</sup> Besonders die Automobilkonzerne DAIMLER und VW nutzen viele Zeitbezüge.

<sup>488</sup> Mit der UNTERNEHMENSTRADITION beschäftigt sich auch das Feld der *Corporate History* (vgl. Delahaye 2009; McLaren-Hankin 2012; Gatti 2012).

Als führende Manager in einem Traditionsunternehmen wie Linde haben meine Kollegen und ich eine eindeutige Verpflichtung: Wir müssen alles dafür tun, dass sich unser Unternehmen nachhaltig erfolgreich entwickeln kann. (Linde GB 2010)

Auf der Syntagmenebene wird *Tradition* häufig durch *unsere\** oder *lange\** attribuiert (›Traditionsart‹ ‚besitzanzeigend‘ oder ‚lang‘), wobei Letzteres dominiert:

Bayer ist ein Erfinder-Unternehmen, denn Forschung hat bei uns eine lange Tradition. (Bayer Mission und Werte)

Eine aufschlussreiche Sachverhaltsverknüpfung zeigt sich in diesem Beleg von BAYER, da das Kompositum *Erfinder-Unternehmen* kausal (*denn*) aus der TRADITION (*lange Tradition*) abgeleitet wird. Bei HENKEL wird aus der TRADITION unter anderem IDENTITÄT konstruiert:

So markierte das neue Jahrtausend den Beginn eines umfassenden Prozesses, in dessen Verlauf Vision und Werte, Identität und Erscheinungsbild des Unternehmens sorgfältig analysiert, reflektiert und auf der Grundlage bewährter und gefestigter Traditionen schließlich neu definiert und gestaltet wurden. (Henkel Corporate Identity)

Der Sachverhalt TRADITION wird durch *gefestigt[e]* auch implizit als ‚gut‘ bewertet. Daraus erwächst ein Anspruch auf ›Traditionspflege‹, was die Kookkurrenzen von *Tradition/en* mit *Pflege* in diversen Aussagen bestätigen:

Auch die Pflege von Traditionen wird im Unternehmen als Teil des verantwortlichen Handelns verstanden. In diesem Sinne unterstützen wir auch die Deutsche Lufthansa Berlin-Stiftung. Als ein Leuchtturmprojekt baut die Stiftung in detailreicher Arbeit und mit hoher Expertise gemeinsam mit Kollegen der Lufthansa Technik und externen Fachleuten ein Flugzeug der legendären Lockheed Super Constellation-Reihe neu auf. (Lufthansa GB 2010)

Auf der Satzebene erfolgt durch *Tradition haben* oder die Situierungsmetapher *in Tradition stehen* häufig ein Verweis auf die ›Traditions-handlung‹ ‚statisches Dasein‘, was ›Traditionspflege‹ ähnelt:

Diese Internationalisierung hat Tradition. (BDF Imagebroschüre)

TRADITION wird auch in anderen Fällen als verkürztes Legitimationsargument (›Tradition legitimiert X‹) genutzt (etwa für ‚Wissen‘, ‚Produkte‘ oder ‚Fortbestehen‘):

Unsere Bergleute leben aus ihrer Tradition heraus wichtige Werte: Zuverlässigkeit, Teamgeist und gegenseitiges Vertrauen. (K+S GB 2010)<sup>489</sup>

K+S gebraucht den Ausdruckskomplex *aus ihrer Tradition* hierbei, um spezielle WERTE (*Zuverlässigkeit, Teamgeist und gegenseitiges Vertrauen*) ursächlich an TRADITION zu binden. Ebenfalls beim präpositionalen Anschluss im *Claim* von DAIMLER (*Innovation aus Tradition*) wird INNOVATION kausal aus TRADITION abgeleitet. *Tradition* wird lexikalisch variiert durch *Vergangenheit, Erbe, Erfahrung* und *\*geschichte*, die teilweise in Kookkurrenz auftreten.<sup>490</sup> FRESINIUS MEDICAL CARE, FRESINIUS und K+S verwenden den Ausdruck *Erfahrung* dabei

---

<sup>489</sup> Vgl. dazu auch: „Als Pioniere des Automobilbaus betrachten wir es als Ansporn und Verpflichtung, unsere Tradition mit wegweisenden Technologien und hochwertigen Produkten fortzusetzen.“ (Daimler Unternehmensinformationen 2010).

<sup>490</sup> Vgl. dazu: „Aus der Vergangenheit haben wir gelernt, dass Größe allein nicht ausreicht, um dauerhaft erfolgreich zu bleiben.“ (Siemens GB 2010).



besonders zahlreich (der *Geschäftsbericht 2010* von FRESenius MEDICAL CARE trägt etwa den Subtitel *Erfahrung*). Meist taucht *Erfahrung* im Syntagma *jahrzehntelange\*/langjährige\*/x-jährige\* Erfahrung* auf:

Die K+S Gruppe besitzt mit ihrer über 100jährigen Erfahrung die Kompetenz, Landwirte bei ihren täglichen Herausforderungen mit über Generationen gewachsenem Know-how zu unterstützen. (K+S GB 2010)

Im Beleg wird eine logische Ableitung der UNTERNEHMENSHANDLUNG (*unterstützen*) aus der ERFAHRUNG (*über 100jährigen Erfahrung*) suggeriert, die K+S sich zu eigen gemacht hat (*über Generationen gewachsenem Know-how*). Dass ERFAHRUNG damit auch ‚kostbar‘ ist, markiert die vielfache Metapher *Erfahrungsschatz*:

Lufthansa hat aus den Krisen der vergangenen Jahre gelernt und kann auf einen reichhaltigen Erfahrungsschatz im Umgang mit unterschiedlichen Szenarien zurückgreifen. (Lufthansa GB 2010)

Auch die Verbindung von *einzigartig\** und *Erfahrung* zeigt die ‚Kostbarkeit‘ von ERFAHRUNG an, was FRESenius MEDICAL CARE auf der Textebene sprachlich reflektiert:

Was macht unsere Erfahrung einzigartig? Als vertikal integriertes Unternehmen stellen wir nicht nur Produkte für die Dialyse her und entwickeln Therapieverfahren, sondern wir verwenden unsere Produkte und Verfahren auch täglich in den eigenen Kliniken. Unsere Erfahrung ist deshalb einzigartig vielseitig: Sie reicht von der Beschaffung und komplexen Fertigungstechnologien über das Qualitätsmanagement bis hin zur umfassenden Versorgung von Patienten, auch auf Basis hoch entwickelter klinischer Qualitätsdatenbanken. Unsere Erfahrung ist zudem einzigartig vernetzt: Der Austausch mit den Patienten, Ärzten und Dialysefachkräften in unseren Kliniken hilft uns dabei, unsere Leistungen und Produkte kontinuierlich zu verbessern – und dadurch Wert für unsere Anspruchsgruppen zu schaffen. (FMC GB 2010)

Bei FRESenius MEDICAL CARE geht die Thematisierung von ERFAHRUNG jedoch nicht mit klassischen Sachverhaltsverknüpfungen (KUNDENORIENTIERUNG, KOMPETENZ<sup>491</sup>) einher, sondern wird mit QUALITÄT in der WERTSCHÖPFUNGSKETTE sowie KUNDENVERNETZUNG verknüpft. Die Bedeutung des Ausdrucks *Erfahrung* wird auch metasprachlich relativ unkonventionell festgesetzt, was zur sprachlichen Alleinstellung von FRESenius MEDICAL CARE beiträgt, indem *Erfahrung* antithetisch (*gerade weil*) zu *junges Unternehmen* gesetzt wird:

Was bedeutet für uns Erfahrung? Erfahrung hat für Fresenius Medical Care einen besonderen Wert, obwohl und gerade weil wir ein noch junges Unternehmen sind. (FMC GB 2010)

Adjektivisch wird auf den Sachverhalt VERGANGENHEIT durch *traditionsreich\** zugegriffen, wobei das Adjektiv sogleich als Eigenschaftszuschreibung an UNTERNEHMEN dient:

Mit unserer viel beachteten Markenkampagne „MAN kann“ haben wir deutlich gemacht, dass wir nicht nur ein traditionsreiches, sondern gleichzeitig auch ein modernes und fortschrittliches Unternehmen sind. (MAN GB 2010)

Das Adjektiv *traditionell\** attribuiert häufig das Substantiv *Werte*. Als Adverb besitzt *traditionell* darüber hinaus eine positive Konnotation im Kontext der Betonung der VERGANGENHEIT von Unternehmen (vgl. Delahaye 2009), da es das tieferliegende Konzept ›Kontinuität und Konstanz von der Vergangenheit bis in die Gegenwart‹ evoziert:

---

<sup>491</sup> Schuster (2000, 604) bestätigt, dass KUNDENORIENTIERUNG, GÜTE oder KOMPETENZ oft aus der ERFAHRUNG abgeleitet werden.



Bayer legt traditionell großen Wert auf die Förderung von Bildung und Forschung. (Bayer Namen. Zahlen. Fakten 2010/2011)

Ebenso das Adverb *jeder* erfüllt diese Funktion, wodurch das UNTERNEHMEN bzw. dessen HANDELN eine noch stärkere Historisierung erfahren:

Bei der Arbeit mit unseren Kunden lassen wir uns von Werten leiten, die [...] seit jeder einen hohen Stellenwert haben. (Commerzbank Die Marke der neuen Commerzbank)

Der Ausdruck *historisch* unterstreicht in den folgenden Belegen die Historizität von OBJEKTEN (*Marke*):

Die historisch erfolgreich gewachsene Marke Allianz baut im Wesentlichen auf zwei Säulen auf: einem herausragenden Produkt-, Dienstleistungs- und Vertriebsangebot sowie einem nachhaltigen Markenmanagement, welches sich innerhalb eines globalen Gesamtkontexts bewegt. (Allianz GB 2010)

Eine (noch andauernde) kontinuierliche Entwicklung aus der Vergangenheit heraus kann letztlich auch grammatisch über den Tempusgebrauch annonciert werden, indem das Perfekt genutzt wird (vgl. Köller 2004, 438):

Seit Gründung der BASF im Jahr 1865 hat sich unser Unternehmen ständig weiterentwickelt, um Antworten auf globale Veränderungen zu geben. (BASF We create chemistry)

Im Beleg von BASF verstärkt das Adverb *ständig* die Anzeige historischer Kontinuität; diese taucht auch mithilfe lexikalischer Varianten wie *kontinuierlich*, *immer wieder* oder *Tag für Tag* auf:

Wir stellen Herkömmliches immer wieder in Frage und entwickeln neue Lösungen für alle. (Deutsche Bank Leitbild und Marke)

Wir entwickeln innovative Technologien, erschließen neue Kundengruppen und gestalten aktiv die Zukunft der individuellen Mobilität. Damit schaffen wir die Basis, um langfristig profitabel zu wachsen. Wir haben den Anspruch, die Besten zu sein. Das ist unser Antrieb – Tag für Tag. (BMW GB 2010/Strategie)

Im letzten Beleg von BMW wird gleichzeitig ein Bezug auf GEGENWART und ZUKUNFT vorgenommen, wodurch das Konzept ›Permanenz durch zeitliche Kontinuität‹ aufgerufen wird.

Eine weitere sprachliche Auffälligkeit, die sich bei der Bezugnahme auf VERGANGENHEIT im Korpus zeigt, ist das Substantiv *Jahr\** (*Jahr* sowie *Vorjahr* sind *Keywords*), das in diversen syntagmatischen Einbettungen erscheint. Durch *x Jahre/x-jährig* ist der Fokus auf die ›Zeitdauer‹ ‚lang‘ gelegt. Die Dominantsetzung einer ›Zeitdauer‹ wird dabei durch die temporalen Präpositionen *in/während* + *x Jahre* eingeleitet:

Während der letzten 120 Jahre hat die Allianz ein solides Fundament geschaffen, das uns in die Lage versetzt, effektiv auf Umfeld- und Marktänderungen einzugehen. (Allianz GB 2010)

In den vergangenen 15 Jahren aber haben vollelektronische und standortunabhängige Handelssysteme das Börsengeschäft revolutioniert. (Deutsche Börse Vom Parkett zum elektronischen Handelsplatz)

Im folgenden Beispiel von HENKEL findet sich dieses sprachliche Muster zur Betonung der Singularität der (jetzigen) UNTERNEHMENSIDENTITÄT:

Noch nie in der 130-jährigen Firmengeschichte haben sich Management und Mitarbeiter so intensiv mit den Unternehmensgrundsätzen und der Unternehmensidentität (Corporate Identity) von Henkel beschäftigt wie in den vergangenen Jahren. (Henkel Corporate Identity)

In Kombination mit dem temporalen Junktor *seit* (*seit x Jahren*) wird dagegen die ZEITDAUER von ‚Beginn‘ aus perspektiviert, wodurch ebenso das ‚Alter‘ zum Ausdruck kommt:

Daimler ist seit 125 Jahren eine treibende Kraft bei der Entwicklung des gesamten Straßenverkehrs. (Daimler Das Unternehmen 2011)

Ebenfalls das Syntagma *vor x Jahren* erfüllt diese Funktion:

Als wir vor rund 30 Jahren begannen, Dialyseprodukte herzustellen, gehörten wir zu den Pionieren unserer Branche. (FMC GB 2010)

Dass die Genauigkeit der temporalen Angabe dabei nicht die primäre Intention der Unternehmen ist, sondern die Anzeige von ‚Alter‘, lassen die vagen Formulierungen *seit über/seit mehr als (x) Jahren* erahnen:

Unsere Werte – verantwortungsvoll, exzellent und innovativ – sind seit über 160 Jahren das Fundament für den Erfolg von Siemens. (Siemens Unsere Werte)

Adjektivisch erfüllen diese Funktion *langjährig\** oder *jahrzehntelang\**:

Im vergangenen Geschäftsjahr unterstrichen erfolgreiche Projektabschlüsse im SAP-Umfeld das Know-how und die langjährige Erfahrung von Lufthansa Systems. (Lufthansa GB 2010)

Unser Kompetenzzentrum Gastechnik & Energiesysteme bündelt jahrzehntelange Erfahrung und technisches Know-how im Erdgasbereich. (E.ON Cleaner and better energy)

Während in den bisherigen Belegen das Konzept ›Zeitdauer‹ betont wurde, geht es in den anschließenden Ausführungen um das Aufrufen des Konzeptes ›Zeitpunkt‹. ZEITPUNKTE sind meist unmittelbar an wichtige EREIGNISSE gekoppelt (GRÜNDUNGEN, PRODUKTEINFÜHRUNGEN, FUSIONEN etc.), die durch die bloße Nennung einer JAHRESZAHL mitaufgerufen werden. Durch Satzabbrüche (Anakoluthe) werden beispielsweise GRÜNDUNGEN häufig betont:

GEGENSÄTZE ZIEHEN SICH AN. SEIT 1668. (Merck Einzigartig – Der Merck Weg)

Die Deutsche Börse organisiert den Markt für Wertpapiere. Und das schon seit 1585. (Deutsche Börse Vom Parkett zum elektronischen Handelsplatz)

Dass 1558 als ›Zeitpunkt‹ besonders ‚früh‘ erscheint, zeigt DEUTSCHE BÖRSE durch das Adverb *schon* vor der temporalen Angabe *seit 1585* an. Ein weiterer ‚historischer‘ ›Zeitpunkt‹, der mit der Bezugnahme auf JAHRESZAHLEN (ohne temporale Adverbien) evoziert wird, findet sich in der deskriptiven Beschreibung von PRODUKTEINFÜHRUNGEN und FUSIONEN:

Im Jahr 1991 übernimmt Merck die „Société Lyonnaise Industrielle Pharmaceutique“ (Lipha). Mitte der 1990er-Jahre wird das Selbstmedikationsgeschäft um die englische Seven Seas und die französische Monot erweitert. (Merck Einzigartig – Der Merck Weg)

MERCK nimmt auch auf der Textebene auf die VERGANGENHEIT Bezug, indem die *Corporate History* von MERCK relativ komplex abgebildet wird, die als Ausgangspunkt einer Weiterentwicklung des Unternehmens dient (→ 8.4.2.4):

Unsere Haltung und unsere Handlungsweise sind gewachsen aus den Erfahrungen einer fast 350-jährigen Geschichte [...]. (Merck Einzigartig – Der Merck Weg)

In Anlehnung an das bei MERCK zugrunde gelegte Konzept ›Unternehmenszukunft erwächst aus Unternehmensgeschichte‹ widmet sich das folgende Kapitel dem Sachverhalt ZUKUNFT.

### 1.2.15.2 ZUKUNFT

Die besondere Herausstellung von ZUKUNFT ist im Korpus nicht nur durch die lexikalischen Realisierungen auffällig (\**zukunft*\* besitzt 820 *Hits* in den Konkordanzen und besitzt *Key-word*-Status<sup>492</sup>). Laut Gohr (2002, 263f.) stoßen gerade die Zukunftsprognosen bei allen Lesergruppen des *Geschäftsberichts* auf starkes Interesse. Im Korpus bestätigt sich diese Perspektivierung anhand des Konzeptes ›Zukunftsfixierung‹ und manifestiert sich in der Analyse durch eine Fülle an Bedeutungs-/bzw. Sachverhaltsfixierungsversuchen mittels der Kollokation *Zukunft definieren*:

Wir erfinden die Zukunft, indem wir sie selbst definieren. Ein Beispiel dafür ist der Hightech-Werkstoff Karbon, den wir künftig in großem Umfang für neue Fahrzeugkonzepte einsetzen. (BMW GB 2010)

Im Beleg von BMW verstärkt *selbst* dabei den Absolutheitsanspruch des Unternehmens zur Festsetzung der ZUKUNFT. SAP versteht diese durch die Bezugnahme auf ein eigenes FORSCHUNGSINSTITUT (*SAP Research*) mit institutioneller Deontologie:

Durch die detaillierte Erkundung verschiedener Geschäftsfelder und Szenarien ist SAP Research in der Lage, jene zukunftsweisenden Technologien und Anwendungen zu definieren, die das größte Wertschöpfungspotenzial aufweisen – sogenannte Next Big Things. (SAP GB 2010)

Auffällig im Sinne der ›Zukunftsfixierung‹ ist auch das Syntagma *Zukunft\* besetzen*:

Exzellente Perspektiven. Wir besetzen die globalen Zukunftsthemen: Energieeffizienz, Mobilität und Sicherheit. (Infineon GB 2010)

In diesem Beispiel von INFINEON wird eine doppelte Fixierung vorgenommen, da THEMEN nicht nur *besetzt*, sondern auch zugleich als *Zukunftsthemen* bezeichnet werden. Der Sachverhaltsfestsetzung dienen weiterhin assertive Aussagen der Form *X ist/braucht Zukunft*:

Nachwuchs ist Zukunft. (Daimler Das Unternehmen 2011)

Wachstum braucht Zukunft. (K+S GB 2010)

ZUKUNFT erfährt daneben eine konkrete Materialisierung durch metaphorische Aussagen:

Zukunft zum Anfassen – T-Systems hat in der bayerischen Hauptstadt ihr erstes Innovation Center eröffnet, um Innovationen erlebbar zu machen. (Telekom GB 2010)

Wir bauen unsere Zukunft auf ein starkes Fundament. Seit der Gründung der Firma im Jahr 1876 zeigt die Familie Henkel ihr Bekenntnis zum Unternehmen. (Henkel Vision und Werte)

In diesen Belegen wird die ZUKUNFT durch haptisches Zutun (*Anfassen, bauen*) materialisierbar (s.u.). Festsetzungsversuche finden auch auf Satz- und Textebene statt:<sup>493</sup>

Die Zukunft. Auch in Zukunft wird sich Merck in seinen Pharma-, Chemie und Life-Science-Geschäften auf Spezialitäten konzentrieren und dabei Synergien erzeugen. (Merck GB 2010)

Die Anschlussregelung – das „Zukunftskonzept 2016“ – ist im Januar 2011 mit einer Laufzeit bis Ende Dezember 2016 in Kraft getreten. [...]. (K+S GB 2010)

---

<sup>492</sup> Vgl. dazu: \**vergangenheit*\* (37x); \**tradition*\* (172x); \**geschichte*\* (115x).

<sup>493</sup> Der *Geschäftsbericht 2010* von BMW hat darüber ein eigenes Magazin namens *Zukunft* in sich. *Unsere Zukunft* lautet auch eine Teilüberschrift im Text *Das Unternehmen* von E.ON.

Wie die ZUKUNFT genau aussehen soll, zeigen adjektivische Eigenschaftszuschreibungen durch *x Zukunft* (>Zukunftsart<) an. Meist handelt es sich dabei um die Eigenschaft ‚nachhaltig‘:

Ob Stromladestationen oder Wasserstofftankstellen, intelligente Verkehrsführung und Telematik – Daimler initiiert und begleitet aktiv Modellversuche und Pilotprojekte für eine mobile nachhaltige Zukunft. (Daimler Unternehmensinformationen 2010)

Unter den Belegen fallen auch solche auf, in denen ZUKUNFT mittels Adjektiven eine ‚Produktphysis‘ als >Zukunftsart< zugeschrieben wird:

Vielfalt ist unsere Stärke. Und sie ist der Treibstoff auf dem Weg in die automobile Zukunft. (VW GB 2010)  
Netzausbau für eine breitbandige Zukunft. (Telekom GB 2010)

Beide Belege nutzen Ausdrücke, die sich eigentlich als Substantiv (*Automobil*, *Breitband*) auf PRODUKTE beziehen und bilden daraus adjektivische Neologismen, die an den Sachverhalt ZUKUNFT geknüpft werden. Adjektive leiten auch implizite positive Bewertung der ZUKUNFT ein (v.a. durch *erfolgreich\** oder *stark\**):

Mit der Strategie Number ONE haben wir im Jahr 2007 die Weichen für eine erfolgreiche Zukunft gestellt. (BMW GB 2010/Konzernporträt)

Merck ist das älteste pharmazeutisch-chemische Unternehmen der Welt – seine Wurzeln reichen zurück in das Jahr 1668. Seitdem ist viel geschehen, wir haben eine Menge erreicht – und wir haben eine starke Zukunft vor uns. (Merck Einzigartig – Der Merck Weg)

Explizite Bewertungen durch *positiv\** oder *besser\** offenbaren sich daneben:

Die Begrenztheit natürlicher Ressourcen, die zunehmende Belastung des Ökosystems sowie gesellschaftsrelevante Forderungen wie menschliche Arbeitsbedingungen oder Gleichberechtigung sind ganz wesentliche Faktoren, die das unternehmerische Handeln beeinflussen. Unsere Unternehmens-Grundsätze berücksichtigen das – und schaffen so ein Leitbild für eine positive Zukunft. (BDF Nachhaltigkeitsbericht 2010)

Nachhaltig für eine bessere Zukunft wirtschaften. (BASF Gemeinsam Zukunft gestalten)

Zu den regelhaft gebrauchten Syntagmen, die auf ZUKUNFT verweisen, zählt auch *X an/für die Zukunft*, wobei ‚Zukunft‘ zum >Unternehmensadressat< wird (>Zukunft als Nutznießer<):

Angesichts eines breiten Portfolios, das von modernen Alltagsprodukten für Verbraucher bis zu komplexen chemisch-technischen Systemlösungen für Industriekunden reicht, wurden Markenartikel und Technologien als strategische Säulen für die Zukunft bestimmt. (Henkel Corporate Identity)

Seltener steht das Lexem *Zukunft* in agentivischer Position (mittels *X der Zukunft*):

Die Motivation und Kompetenzen unserer Führungskräfte sind entscheidend dafür, wie gut sich HeidelbergCement im globalen Wettbewerb positioniert und auf die Herausforderungen der Zukunft vorbereitet ist. (HeidelbergCement GB 2010)<sup>494</sup>

Als rechtsseitiges Kollokat von *Zukunft* fällt das Syntagma *Zukunft der/des X* auf, wodurch konkrete >Zukunftsträger< evoziert werden: Meist geht es um das ‚Unternehmen‘:

Den richtigen Mitarbeiter zur richtigen Zeit für die richtige Position zu gewinnen ist entscheidend für die Zukunft des Konzerns Deutsche Post DHL. (Deutsche Post GB 2010)

---

<sup>494</sup> Vgl. dazu auch: „Trends frühzeitig aufgreifen und sich auf Anforderungen der Zukunft einstellen.“ (Bayer Leitbild).

Auch ‚Produkte‘ werden als ›Zukunftsträger‹ einbezogen:

Zukunft der Kernenergie. Das beherrschende Thema für die Nuclear Fleet war im Jahr 2010 die politische Einigung der Regierungskoalition in Deutschland auf ein umfassendes Energiekonzept, das auch eine Laufzeitverlängerung der deutschen Kernkraftwerke enthält. (E.ON Cleaner and better energy)

Sie [neue Ziele, S.B.] unterstützen uns dabei, auch zukünftig unsere herausragende Marktposition zu behaupten und neue Wege in die Zukunft der Dialyse zu gehen. (FMC GB 2010)

In den Belegen zu ‚Produkte‘ fallen inhaltlich die generischen Formulierungen im Sinne der Besetzung der gesamten ‚Produktklasse‘ (*Kernenergie, Dialyse*) ins Auge. Weitere rechtsseitige Anschlüsse an *Zukunft\** erscheinen in Form von zahlreichen Substantivkomposita mit *Zukunft\** als erster Konstituente. Hier erscheint insbesondere das Substantiv *Zukunftsfähigkeit* (›mentale Zukunftsfertigkeiten‹):

Nachhaltigkeit bedeutet für Bayer im Kern Zukunftsfähigkeit und ist deshalb integraler Teil unserer Geschäftsstrategie. (Bayer Namen.Zahlen.Fakten 2011/2012)

Das Verb *sichern* taucht musterhaft in Verbindung mit *Zukunftsfähigkeit* auf:

Um seine Zukunftsfähigkeit zu sichern, ist es für ein international tätiges und stark innovatives Unternehmen wie Henkel wichtig, ständig herausragend qualifizierte Fach- und Führungskräfte zu rekrutieren. (Henkel Corporate Identity)

Diese Aussagen präsupponieren, dass ZUKUNFT ‚sicherbar‘ ist und evozieren somit wiederum das Konzept ›Zukunftsfixierung‹ (s.o.): So entsteht auch die Zusammensetzung *Zukunftssicherung*.<sup>495</sup> Zudem impliziert der Ausdruck *Zukunftsfähigkeit* auch, dass das Unternehmen imstande ist, die ZUKUNFT zu erreichen:

In Deutschland investieren wir in die Zukunftsfähigkeit des Unternehmens auch, indem wir junge Menschen ausbilden. (FMC GB 2010)

Zur Fixierung des Sachverhalts ZUKUNFT dienen ferner die Komposita *Zukunftskonzept*, *Zukunftsthemen* (s.o.), *Zukunftsbasis*<sup>496</sup> sowie *Zukunftslösungen* und *Zukunftstechnologien*<sup>497</sup> (als ›Zukunftsträger‹). Daneben manifestieren sich adjektivische Komposita, die den Sachverhalt ZUKUNFT durch eine ›Zukunftsrichtung‹ fixieren: *zukunftsgerichtet\**<sup>498</sup>, *zukunftsorientiert\**<sup>499</sup> und *zukunftsweisend\**<sup>500</sup>. Diese werden dabei besonders in Zusammenhang mit dem Ausdruck *Lösung\** (in Bezug auf PRODUKTE) gebraucht:

Daimler will der Motor für nachhaltige Mobilität sein – mit zukunftsweisenden Lösungen für emissions- und

---

<sup>495</sup> Vgl. dazu: „Merck zielt auf nachhaltigen Erfolg und Zukunftssicherung, nicht auf kurzfristige Gewinnmaximierung.“ (Merck Einzigartig – Der Merck Weg).

<sup>496</sup> Vgl. dazu: „Überall in der Welt arbeiten wir daran, die Kundenzufriedenheit und damit den Konzern sowie seine Zukunftsbasis weiter zu stärken.“ (ThyssenKrupp GB 2010).

<sup>497</sup> Vgl. dazu: „Wir sind also nicht nur bei Zukunftstechnologien gut aufgestellt, sondern auch in den Zukunftsmärkten.“ (Daimler Unternehmensinformationen 2010).

<sup>498</sup> Vgl. dazu: „Wir suchen zukunftsgerichtete Lösungen und nicht nur inkrementelle Verbesserungen.“ (ThyssenKrupp Unsere Werte).

<sup>499</sup> Vgl. dazu: „Ein umfassendes Engagement im Interesse der Nachhaltigkeit betrachten Analysten und Investoren heute als Indikator für eine zukunftsorientierte Unternehmensführung.“ (VW GB 2010).

<sup>500</sup> Vgl. dazu: „Mehr als drei Jahrzehnte Erfahrung in der Dialyse, zukunftsweisende Forschung, Weltmarktführer bei Dialysetherapien und Dialyseprodukten – dafür steht Fresenius Medical Care.“ (FMC Unsere Vision).

unfallfreies Fahren. (Daimler Daimler hat das Automobil erfunden)

Aus diesen ZUKUNFTSWEISENDEN LÖSUNGEN wird die Fähigkeit von DAIMLER abgeleitet, in der ZUKUNFT zu bestehen, was die Adjektive *zukunftsfähig\** und *zukunftsverträglich\** semantisch aufnehmen:

Die MAN Gruppe hat sich in den vergangenen Jahren eine hervorragende Position erarbeitet, sich auf Innovation und Wachstum ausgerichtet und sich als starkes und zukunftsfähiges Unternehmen gezeigt. (MAN Unternehmensleitbild)<sup>501</sup>

Betrachtet man im nächsten Schritt die Satzebene, taucht der Phraseologismus *in Zukunft* häufig in Kombination mit Modalverben auf, die festsetzen, was für die ZUKUNFT gelten soll:

Auch in Zukunft wollen wir dazu beitragen, die Lebensqualität von Patienten weltweit zu verbessern. (Fresenius Auf einen Blick 2011)

Die K+S Gruppe strebt einen fairen Ausgleich von wirtschaftlichen, ökologischen und sozialen Belangen an – damit wir auch in Zukunft für Rohstoffsicherheit und eine gesunde Umwelt Sorge tragen können. (K+S GB 2010)

Daneben zeigt sich die Markierung von hoher epistemischer Sicherheit hinsichtlich des Eintretens von Sachverhalten in der ZUKUNFT durch den Tempuseinsatz:

Auch in Zukunft wird sich Merck in seinen Pharma-, Chemie und Life-Science-Geschäften auf Spezialitäten konzentrieren und dabei Synergien erzeugen [...]. (Merck GB 2010)

So bleiben wir heute und auch in Zukunft, was wir bereits sind: ein Unternehmen, dem man vertrauen kann. (BDF Imagebroschüre)

Diese Beispiele bestätigen erneut, dass Aussagen über die ZUKUNFT des Unternehmen als Fakten präsentiert werden, woraus große Machtwirkungen entstehen (vgl. Jernej 2008, 162; Felder 2013, 15). Bei BEIERSDORF wird beispielsweise der Ist-Zustand bezüglich UNTERNEHMENSIDENTITÄT (*was wir sind*) automatisch auf den anvisierten Soll-Zustand übertragen (*bleiben*). Neben dem Lexem *Zukunft\** zeigen sich noch weitere lexikalische Auffälligkeiten, die auf den Sachverhalt ZUKUNFT verweisen, z.B. Adverbien. Mehrfach taucht *morgen* in der Konstruktion *X von morgen* in den untersuchten Repräsentationstexten auf:

Durch die Ausrichtung auf die Märkte von morgen ermöglichen und sichern wir viele tausend Arbeitsplätze vor allem in strukturschwachen Gebieten. (K+S GB 2010)

Wir machen Netze intelligent und sichern damit die Stromversorgung von morgen. (RWE GB 2010)

Als Substantivierung offenbart sich auch die Variante *im Morgen*, die metonymisch für *Zukunft* steht:

Respekt heißt, Leistung wertzuschätzen – im Gestern, Heute und auch im Morgen. (Merck Merck Werte)

Auch Adverbien können auf den Sachverhalt ZUKUNFT referieren: Die Ausdrücke (*nach vorn*, *vorweg* sowie *voraus* evozieren wiederum das Konzept ›Zukunftsrichtung‹, indem das Präfix *vor\** einen prospektiven Charakter kennzeichnet:

VoRWEg gehen heisst Klartext reden. (RWE GB 2010)

---

<sup>501</sup> Vgl. dazu: „Unser Ziel ist eine nachhaltige, zukunftsverträgliche Entwicklung.“ (HeidelbergCement Corporate Mission).



Den Blick stets nach vorn zu richten und Potenziale auszuschöpfen – das zeichnet unsere Strategie aus. (Lufthansa GB 2010)

RWE nutzt *VoRWEg* erneut in Kombination mit Kapitalbuchstaben, aus welchen der Eigenname RWE zu entziffern ist. Besonders stark ausgeprägt ist der sprachreflexive Bezug auf ZEIT (*Zeit\**) jedoch im Kontext des Adverbs *voraus*:

Um das Reiseerlebnis immer angenehmer zu gestalten, entwickeln wir exzellente Lösungen, die uns vom Wettbewerb abheben und den Zeitgeist nicht nur treffen, sondern ihm oft voraus sind. (Lufthansa GB 2010)

Schon immer waren wir bei der Entwicklung neuer Technologien und der Verbesserung der Aktiven und Passiven Sicherheit unserer Zeit voraus. (Daimler Unternehmensinformationen 2010)

LUFTHANSA und DAIMLER zeichnen ihre Aussagen hierbei stark prospektivisch, da sie ihr gegenwärtiges HANDELN als in der ZUKUNFT stattfindend verorten. Das dahinterstehende Konzept ›kontinuierlicher Innovationsdrang‹ wurde bereits in Kapitel → 1.9.2 dieses Anhangs (INNOVATION) aufgegriffen und hier auf die ZUKUNFT übertragen, da das Nicht-Verweilen in der GEGENWART durch die Häufung des Adverbs *weiter* und des Wortbildungselements *fort\** in *fortwährend*, *fortlaufend*, *fortsetzen*<sup>502</sup> sowie *Fortschritt* aufgegriffen (und temporal gelesen) wird:

Weiter denken. (Munich Re GB 2010)

Und der Fortschritt geht weiter. Anlässlich der IAA in Hannover stellte MAN die spektakuläre Lkw-Studie Concept S vor. (MAN GB 2010)

In den Belegen geht die Agentisierung von *Fortschritt* einher mit der Entgrenzung des Möglichkeitssinns<sup>503</sup>, denn die temporale (wie bereits spatiale) ›Entgrenzung‹ scheint so bedeutend, dass ZUKUNFT paradoxerweise permanent aktualisiert und damit praktisch unerreichbar wird, d.h. UNTERNEHMEN sich permanent erneuern müssen (*Update der Zukunft*):

Mit der als Vorgeschmack der Serienversion geltenden Studie L 1 zeigt Volkswagen auf der IAA als Update der Zukunft sein 1-Liter-Auto. (VW Zahlen.Daten.Fakten)

Als letztes werden im Kapitel ZUKUNFT noch Metaphern behandelt, da diese bedeutsame Indikatoren für Konzeptualisierungen von ZEIT sind (vgl. Gatti 2012).<sup>504</sup> Die hierbei aufgefundenen Muster lassen sich folgendermaßen gruppieren: Am häufigsten erscheint die Konzeptualisierung ›Zukunft als Raum‹ (1), welche in verschiedenen konzeptuellen Ausprägungen auftritt: Die Perspektivierung ›Zukunft bewegt sich‹ (1a) findet sich etwa in Abbildung 117

---

<sup>502</sup> Vgl. dazu: „Die Luftfahrt ist und bleibt ein Wachstumsmarkt, in dem wir unsere wirtschaftliche und qualitative Weiterentwicklung in einem herausfordernden Umfeld fortsetzen.“ (Lufthansa GB 2010).

<sup>503</sup> Vgl. dazu Keupp, der von einer „Entgrenzung des Möglichkeitssinns“ (Keupp 2012, 52) bezüglich postmoderner Identitäten spricht (→ 6.4.1.4: ‚aktives Möglichmachen der Potentialität‘). Nur in wenigen Belegen findet sich ›Begrenzung‹: „Umso mehr gilt für Fresenius Medical Care ein Grundsatz, der auch in unseren internen Forschungsrichtlinien festgeschrieben ist: Innovationen müssen nicht nur hochwertig, sondern auch bezahlbar sein, damit die Patienten von ihnen profitieren können.“ (FMC GB 2010).

<sup>504</sup> Als typische raum-zeitliche Metaphern im *Corporate Discourse* nennt Gatti (2012) *Journey*, *River*, *Place*, *Path*, *Flux* und *Transformation* sowie *Change*.

bei DAIMLER wieder, da das Bildzeichen /Auto/ mit der Aufschrift *driving the future* kombiniert wird:

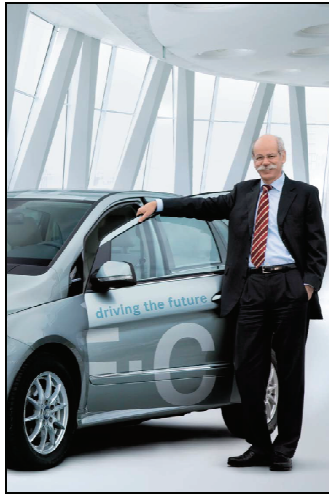

Abbildung 117 - Daimler Unternehmensinformationen 2010

Die Beschriftung *driving the future* („Wir bringen die Zukunft voran“<sup>505</sup>), impliziert, dass DAIMLER mit seinem PRODUKT (AUTO) die ZEIT (ZUKUNFT) ‚bewegen‘ kann, wodurch dem Unternehmen eine große Handlungsmacht zugeschrieben wird. Eine weitere Ausprägung von ›Zukunft als Raum‹ ist das Attribut ‚Unternehmen bewegt sich zur Zukunft hin‘ (1b). Diese tritt beständig auf, da das UNTERNEHMEN als bewegendes OBJEKT dargestellt wird, häufig gepaart mit den Ausdrücken *Bewegung*, *Richtung*, *Schritt* oder *Weg*:

Und schon die ersten Worte der Präambel weisen auf die Richtung hin, in die unser verantwortliches Handeln zielt: die Zukunft. (BDF Nachhaltigkeitsbericht 2010)

Daimler orientiert sich an der Vielfalt der mobilen Anforderungen. Unsere Antwort: eine bislang einmalige Produktvielfalt, mit der wir konsequent mehrspurig in die Zukunft fahren. (Daimler Unternehmensinformationen 2010)

Eine dritte Ausprägung (1c) kann unter ‚Zukunft als konkreter Ort‘ gefasst werden und tritt meist in Kombination mit dem Lokativ (vgl. Müller 2007, 122ff.) *in die Zukunft* auf. Dieses Konzeptattribut wird teilweise gekoppelt mit ‚Unternehmen bewegt sich zur Zukunft hin‘:

Mit Schwung in die Zukunft. (VW GB 2010)

60 Jahre SEAT: Mit neuen Modellen in die Zukunft. (VW GB 2010)

BASF stellt dabei direkt die Frage nach dem Lokativ (*wohin*) und antwortet mit einer konkreten Positionierung:

Wohin wir wollen (ZUKUNFT): die Nummer 1 in der Chemie von morgen. (BASF Gemeinsam Zukunft gestalten)

Durch das Konzept ›Zukunft als Raum‹ wird jedoch in allen Belegen ein statisches Raumkonzept zugrunde gelegt (ähnlich der CONTAINER-Metaphorik), das von homogenen Räumen

<sup>505</sup> Im nicht-metaphorischen Sinne ist auch folgende deutsche Übersetzung möglich: „Wir fahren die Zukunft“. Dabei erscheint die ZUKUNFT als konkretes PRODUKT und leitet so eine andere Perspektivierung ein.

ausgeht (vgl. Galuschek 2012, 15). Dagegen zeigt das metaphorische Konzept ›Zukunft als Tätigkeit‹ (2) eine andere Perspektivierung des Sachverhalts ZUKUNFT an: Hierzu gehört das Attribut ‚Zukunft gestalten‘ (2a<sup>506</sup>), das die Unternehmen sehr homogen und fast formelhaft (im imperativischen bzw. deontischen Infinitiv) realisieren:

Mit Weitblick die Zukunft gestalten. (Lufthansa GB 2010)

Insbesondere BASF und DAIMLER nutzen diese metaphorische Konstruktion, um rekurrent auf INSTRUMENTE (*Technologien, Produkte, Services, Mitarbeiter, Leidenschaft*) zu verweisen, mit denen die ZUKUNFT ‚gestaltet‘ werden soll:

Mit bahnbrechenden Technologien, Produkten und Services gestalten wir die Zukunft der Mobilität. (Daimler Unternehmensinformationen 2010)

Das Attribut ‚Zukunft gestalten‘, das eine TÄTIGKEIT referiert, wird durch Adverbien nochmals unterstrichen (z.B. *aktiv*):

Wir entwickeln innovative Technologien, erschließen neue Kundengruppen und gestalten aktiv die Zukunft der individuellen Mobilität. (BMW GB 2010/Strategie)

Als drittes Konzept manifestiert sich im Korpus ›Zukunft als Weg‹ (3), das Parallelen zu (1b) (‚Unternehmen bewegt sich zur Zukunft hin‘) aufweist. Realisiert wird es durch die Attribute:

- ‚Unternehmen geht einen Weg‘ (3a);

Unsere Vision ist: der führende Anbieter von Premium- Produkten und Premium- Dienstleistungen für individuelle Mobilität zu sein. Im kommenden Jahr werden wir auf diesem Weg konsequent weitergehen. (BMW GB 2010/Strategie)

Werner von Siemens war zu seiner Zeit ein Pionier auf dem Gebiet der Elektrotechnik. [...] Diesen Weg gehen wir konsequent weiter. (Siemens Unsere Werte)

- ‚Unternehmen ist auf dem Weg‘ (3b);

Wir sind auf dem Weg in die Gigabit-Gesellschaft – und die Deutsche Telekom gestaltet sie aktiv mit. (Telekom GB 2010)

- ‚Weg in die Zukunft‘ (3c);

Das neue Leitbild soll dem gewachsenen Unternehmen und seinen Mitarbeiterinnen und Mitarbeitern Orientierung auf dem gemeinsamen Weg in die Zukunft geben. (HeidelbergCement Corporate Mission)

Die ZUKUNFT wird beim Konzept (3) an BEWEGUNG gekoppelt und dadurch panoramisiert. Zugleich ist ZUKUNFT das (FAHRT-)ZIEL eines zielgerichteten WEGES, den das Unternehmen geht. Diese Zielorientierung (›Teleoaffektivität‹ → 6.5.1.5) zeigt in Verkürzung auch der Ausdruck *Mission Zukunft* bei Vw (*Geschäftsbericht 2010*). Beleuchtet man zusätzlich den Kontext der Belege zu Konzept (3) ›Zukunft als Weg‹, finden sich seriell die Ausdrücke *Anfang, Ende, Meilensteine* und *Ziel(e) (des Weges)*. Diese lassen sich als begriffliche Elemente des gezeichneten WEGES ansehen und werden bei MERCK narrativ zum *Merck-Weg* verknüpft:

WIR SIND AUF DEM WEG. ABER NOCH LANGE NICHT AM ZIEL. Unser Weg heißt: Verantwortung übernehmen, Qualitätsmaßstäbe setzen und mit neuen, großen Ideen weiterhin die Zukunft aktiv gestalten.

---

<sup>506</sup> Seltener zeigt das Korpus das Attribut ‚Zukunft vorantreiben‘ (2b); teilweise wird *Zukunft* dabei durch *Veränderungen* lexikalisch ersetzt: „Veränderungen aktiv vorantreiben.“ (Bayer Leitbild).

Seit 1668 gehen wir gemeinsam mit unseren Partnern, Kunden und Mitarbeitern konsequent unseren Weg. [...] Er [der Merck-Weg] wird uns alle auch weiterhin in eine spannende und erfolgreiche Zukunft führen. (Merck Einzigartig – Der Merck Weg)

Ein viertes Konzept, das in einem Diskurs im Bereich WIRTSCHAFT erwartbar war, ist ›Zukunft als materielles Objekt‹ (4). Dieses wird realisiert durch

- ‚Zukunft ist ein Produkt‘ (4a);

Gemeinsam mit Julia haben wir das junge China kennengelernt: ein faszinierendes Land voller Kontraste, in dem die Zukunft greifbar wird. (Metro GB 2010)

- ‚Zukunft ist ein monetäres Investitionsgut‘ (4b);

Unser Engagement betrachten wir strategisch und investieren gezielt in die Zukunft unseres direkten Umfelds. (Deutsche Börse Standpunkte)

In Nachwuchskräfte zu investieren, heißt, in die Zukunft zu investieren. (Daimler Das Unternehmen 2011)

Der Sacherhalt ZUKUNFT wird dadurch materialisiert und teilweise haptisch erfahrbar (s.o. ›Zukunftsfixierung‹). Unternehmen erscheinen als prognostizierende Systeme, die durch technologische, biologische oder medizinische Produkte/Innovationen die ZUKUNFT sichern bzw. steuern können (*Zukunftssicherung*, ›Zukunft als Nutznießer‹), was bereits beim Raum UMWELT aufgefallen war. Die starke teleologische Ausrichtung an der ZUKUNFT offenbarten u.a. auch die Metaphern (‚Unternehmen bewegt sich zur Zukunft hin‘).

### **1.2.15.3 GEGENWART**

Wie schon erwähnt, werden Referenzen auf die GEGENWART weniger häufig (als auf die VERGANGENHEIT oder ZUKUNFT) vorgenommen. Meist wird durch Adverbien auf die GEGENWART rekurriert, z.B. mittels *jetzt* oder *heute*:

Als großer europäischer Energieversorger tragen wir Verantwortung, die weit über unser Unternehmen hinausreicht. Mit unseren Investitionen in Milliardenhöhe bereiten wir heute den Weg für die Energieversorgung der Zukunft. (RWE GB 2010)

Durch die Adverbien *schon* oder *bereits* erfahren die Zeitangaben durch *heute* und *jetzt* mehrfach Verstärkung sowie eine positive Bewertung im Sinne des Konzeptes ›Gegenwartsvorsorge‹:

Die innovativen Halbleiterlösungen von Infineon tragen schon heute dazu bei den Kraftstoffverbrauch und die CO<sub>2</sub>-Emissionen maßgeblich zu senken, die Sicherheit im Auto zu erhöhen sowie Autos auch für Schwellenländer bezahlbar zu machen. (Infineon Wer wir sind)

In allen drei Bereichen nehmen wir bereits heute führende Marktpositionen in den reifen Märkten Westeuropa und Nordamerika ein, die wir auch zukünftig weiter ausbauen wollen. (Henkel GB 2010)

Durch die Stellung am Satzbeginn kann nochmals eine besondere Betonung des Konzeptes erreicht werden:

Schon heute gehören wir mit rund 22.000 Mitarbeitern und mehr als 150 Tochtergesellschaften zu den international führenden Unternehmen im Bereich der Haut- und Schönheitspflege. (BDF Imagebroschüre)

Die enthaltene positive Bewertung kann auch variabel versprachlicht werden (*rechtzeitig*):

Unsere Mitarbeiter werden rechtzeitig durch offene Information und Kommunikation, auch über Hierarchie- und Einheitsgrenzen hinweg, in Arbeits- und Entscheidungsprozesse eingebunden. (BASF Vision. Grundwerte.Leitlinien)

Nimmt man das Morphem *\*zeit\** als Anlass zur weiteren Suche, finden sich in den Belegen zahlreiche generalisierende Aussagen in Bezug auf die GEGENWART:

In einer Zeit, in der die Auswirkungen der Globalisierung auf Klima und Natur besonders in der Logistik kritisch diskutiert werden, bieten wir unter dem Namen „GoGreen“ seit dem Jahr 2006 als erster Expressdienstleister in mehr als 30 Ländern einen klimaneutralen Versandservice an. (Deutsche Post GB 2010)

Wie die Belege zeigen, tauchen im Kontext von *\*zeit\** die Ausdrücke *Globalisierung*, *Wandel*, *Veränderung* etc. auf, wodurch die GEGENWART negativ konnotiert wird. Dies wird noch deutlicher durch die Analyse des Syntagmas *x* (Adjektiv) + *Zeit\**, wobei die GEGENWART mit negativen Eigenschaften ausgestattet wird (›Gegenwartsevaluation‹ ‚negativ‘):

Die Deutsche Telekom steht für Stabilität und Verlässlichkeit in unruhigen Zeiten. Während viele Unternehmen und Industrien infolge der Finanz- und Wirtschaftskrise zum Teil erheblichen Schwankungen ausgesetzt waren, konnten und können unsere Aktionäre auf planbare und solide Geschäftsergebnisse zählen. (Telekom GB 2010)

Vor allem im Bereich *Banking* werden diese Syntagmen gebraucht und in Überschriften (*Erfolgreich in unsicheren Zeiten*, DEUTSCHE BANK *Geschäftsbericht 2010*) aufgenommen. *Unsichere Zeiten* wird bei DEUTSCHE BANK gleichwohl zum Agens:

Unsichere Zeiten mahnen uns, noch wachsamer zu sein, sensibler auf Veränderungen zu achten und Möglichkeiten konsequent zu nutzen. (Deutsche Bank GB 2010)

Am häufigsten findet sich diesbezüglich die Konstruktion *schwierige[n] Zeiten*:

Nachhaltige Personalarbeit bedeutet, auch in schwierigen Zeiten in Ausbildung zu investieren, d.h. qualifizierten Nachwuchs einzustellen und auszubilden. (HeidelbergCement GB 2010)

Auch in wirtschaftlich schwierigen Zeiten handelt E.ON bei Veränderungen mit sozialer Verantwortung, indem Folgen für Mitarbeiter fair und sozial verträglich ausgestaltet werden. (E.ON Cleaner and better energy)

E.ON verstärkt dabei durch *auch*<sup>507</sup> den Anspruch des Unternehmens zur ›Gegenwartsvorsorge‹. Die derzeitigen RAHMENBEDINGUNGEN (*wirtschaftlich schwierigen Zeiten*) werden als ‚schlecht‘ bewertet und damit ein Streben nach der ZUKUNFT legitimiert. Des Weiteren zeigen sich in den Belegen Syntagmen mit Possessivpronomen (*unsere\* Zeit*), die ebenfalls auf die GEGENWART bezogen sind:

Die Ernährung der wachsenden Weltbevölkerung zählt zu den großen Herausforderungen unserer Zeit. (Bayer Namen.Zahlen.Fakten 2010/2011)

Viele Beispiele präsentieren dabei eine direkte syntagmatische Verknüpfung mit *Herausforderungen* (*Herausforderungen unserer Zeit*), womit wiederum auf das zugrunde liegende Konzept ›Gegenwartsevaluation‹ ‚negativ‘ angespielt wird. Die Verbindung *Herausforderun-*

---

<sup>507</sup> Ebenso *gerade* und *selbst* dienen dieser Funktion (*selbst in wirtschaftlich schwierigen Zeiten*).

gen unserer Zeit wird besonders bei SIEMENS markant gebraucht; in Kombination mit *stellen* wird die GEGENWART zum GEGNER:

Siemens stellt sich den Herausforderungen unserer Zeit – heute genauso wie vor über 160 Jahren, als Werner von Siemens das Unternehmen gründete [...]. (Siemens Vision)

Die Belege offenbarten somit insgesamt eine negative Perspektivierung von GEGENWART, die zugunsten der ZUKUNFT überwunden werden muss. Auch die geringe Anzahl an Belegen zu GEGENWART – im Vergleich zu VERGANGENHEIT und ZUKUNFT – legt nahe, dass Unternehmen die GEGENWART seltener referieren, sondern nur als Ausgangspunkt für Retrospektion (auf die VERGANGENHEIT) und Prospektion (auf die ZUKUNFT) nutzen.

Interessant sind in dieser Hinsicht schließlich die von Unternehmen vielfach evozierten ›Zeitstränge‹, die als ‚kontinuierliche horizontale Zeitstruktur‘ oder ‚dichotomische vertikale Zeitstruktur‘ erscheinen. So können Unternehmen ihre UNTERNEHMENSIDENTITÄT zeitlogisch einordnen. Eine ‚kontinuierliche horizontale Zeitstruktur‘ zeichnet sich dadurch aus, dass ein harmonischer Übergang zwischen den verschiedenen Zeitebenen konzeptualisiert wird (oft in der Form *von/vom...zu/bis*):

Vom defizitären Staatsunternehmen Deutsche Bundespost (1990) über den profitablen europäischen Brief- und Paketdienstleister entwickelte sich Deutsche Post DHL zum globalen, börsennotierten Konzern und Weltmarktführer in der Logistik mit der Deutschen Post als starker Säule. (Deutsche Post Daten und Fakten)

Teilweise werden alle drei Zeitebenen (VERGANGENHEIT, GEGENWART, ZUKUNFT) explizit sprachlich aufgegriffen und die Entwicklung des Unternehmens diachron offengelegt:<sup>508</sup>

Er [der Sport, S.B.] ist die Verbindung zwischen unserer Vergangenheit und unserer Gegenwart – und er weist uns den Weg in die Zukunft. (Adidas Leitbild und Werte)

Die Unternehmenswerte (ComWerte) und die historisch gewachsene Unternehmenskultur der Commerzbank bilden die Grundpfeiler unserer Verantwortung – sie beschreiben Geschichte und Gegenwart der Bank, formulieren aber auch einen Anspruch für die Zukunft. (Commerzbank Die Unternehmenskultur der Commerzbank)

In einer Vielzahl von Belegen werden alle drei Zeitebenen (VERGANGENHEIT, GEGENWART, ZUKUNFT) als ‚synchron‘ konstituiert, was semantisch paradox anmutet:

Seit gestern denkt Beiersdorf heute schon an morgen. (BDF Nachhaltigkeitsbericht 2010)

Als Pionier des Automobilbaus gestaltet Daimler auch heute die Zukunft der Mobilität. (Daimler Das Unternehmen 2011)

Der letzte Beleg von DAIMLER legt dabei nahe, dass ZEIT und PRODUKT (*Automobilbau[s]*), wobei Letzteres in allen drei Zeitebenen theoretisch gleichzeitig existiert, verknüpft werden.

---

<sup>508</sup> Vgl. dazu auch die Variationen: „Große technische Entwicklungen wie serienreife Brennstoffzellen-Fahrzeuge wurden in der Vergangenheit allzu leichtfertig für die nahe Zukunft versprochen. [...] Nur: Wann genau das der Fall sein wird, lässt sich schwer vorhersagen. Es gilt, immer wieder zu überprüfen, was letztendlich physikalisch sinnvoll und machbar ist und zugleich ökonomisch umsetzbar. Wir gehen alle diese Themen an – und zwar jetzt und heute.“ (VW GB 2010).



So versuchen manche Unternehmen auch, spezifische Zeitebenen (ZEIT) direkt auf der Sprachoberfläche mit ihrem PRODUKT zu verknüpfen:

„Volkswagen“ markiert für Kaluga ein junges Zeitalter, das der stellvertretende Provinzgouverneur Maxim Akimov in eine schlichte Zahl kleidet: „Unsere Arbeitslosenquote liegt aktuell bei gerade mal 1,1 Prozent.“ (VW GB 2010)

Wir haben für jedes der möglichen Szenarien nach dem Erdölzeitalter die passenden Technologien, zudem verfügen wir über die nötige Expertise. (Linde GB 2010)

Neben diesen Aussagen im Diskurs, welche das Konzept ›Zeitstränge‹ durch das Attribut ‚kontinuierliche horizontale Zeitstruktur‘ aufrufen, existiert aber auch die ‚dichotomische vertikale Zeitstruktur‘, wobei zwei Zeitebenen gegenübergestellt werden. Folgende Ausdrücke finden sich dabei regelhaft:

- *tradition\** vs. *neu\*/modern\**;

Die neue Marke vereint die Stärken der beiden Traditionsmarken. (Commerzbank Die Marke der neuen Commerzbank)

- *Tradition* vs. *Innovation\**;

Hier wurden die lange Tradition und Innovationskraft zweier Familienunternehmen – Merck und Serono – außerordentlich erfolgreich zusammengeführt. (Merck Einzigartig – Der Merck Weg)

- *alt\** vs. *modern\**;

Börsen gehören zu den ältesten Handelsplätzen der Welt – und zu den modernsten. (Deutsche Börse Vom Parkett zum elektronischen Handelsplatz)

Wie die Belege zeigen, werden die Zeitebenen meist durch *und* miteinander synthetisiert. VERGANGENHEIT und GEGENWART werden ebenfalls durch parallele Sätze mit grammatischen Markierungen kontrastiert: Dabei manifestieren sich im ersten Satz meist Verbformen im Präteritum oder Perfekt sowie eine inhaltliche Bezugnahme auf die (GRÜNDUNGS-/PRODUKT-) GESCHICHTE. Diese Darstellung wird im zweiten Satz mit einem inhaltlichen Bezug auf die (UNTERNEHMENS-)GEGENWART kombiniert und formal mittels *heute* + Präsens realisiert:

Der Firmenname in klassisch geschwungenen Lettern, dazu ein Kupferstich des Düsseldorfer Fabrikgeländes mit rauchenden Schloten, so imposant und ehrwürdig sahen die Briefköpfe von Henkel in den Anfangszeiten des Unternehmens aus. Heute tragen sie ein schlichtes ovales Logo mit dem Namenszug und den handschriftlichen Zusatz „A Brand like a Friend“. (Henkel Corporate Identity)

Bereits wenige Jahre nach dem ersten internationalen Kooperationsvertrag im Jahr 1893 erzielte Beiersdorf schon einen wesentlichen Teil des Gesamtumsatzes im Ausland. Heute erwirtschaften wir circa 75 Prozent unseres Umsatzes außerhalb Deutschlands. (BDF Imagebroschüre)

Teilweise tauchen auch Aussagen auf, die beide Zeitebenen als synchron erscheinen lassen:

Denn nur ein Team, in dem jeder sein Bestes gibt, seine Verantwortung kennt und um seine Stärken weiß, kann echte Pionierarbeit leisten – heute wie 1847, als unser Unternehmen gegründet wurde. (Siemens GB 2010)

Durch solche Belege wird eine Parallelität der Zeitebenen GEGENWART und VERGANGENHEIT suggeriert, was folgende Formeln verkürzen:

Seit 1873 am Markt – seit 2010 im DAX. (HeidelbergCement GB 2010)

Auch für die Zeitebenen GEGENWART und ZUKUNFT finden sich dichotomische Strukturen auf der Satzebene, die lexikalisch markiert sind (*Zukunft* vs. *heute*; *heute* vs. *morgen*):

Wir gestalten Zukunft. Und liefern nachhaltige Ideen für die Mobilität von heute und morgen. (Daimler Das Unternehmen 2011)

Interessant ist im folgenden Beleg von RWE, dass die dichotomische Zeitordnung negiert und der fließende ›Zeitenübergang‹ favorisiert wird (*Brückentechnologie*):

Der Start ins Zeitalter der regenerativen Energien geht nicht von heute auf morgen. [...] Wir brauchen daher die Kernenergie als nahezu CO<sub>2</sub>-freie Brückentechnologie während des Umbaus der Stromversorgung hin zu den erneuerbaren Energien. (RWE Unsere Verantwortung 2010)

Die BRÜCKEN-Metaphorik kann in ähnlicher Weise auch durch WEICHENSTELLEN ausgedrückt werden:

Schließlich geht es darum, schon in der Gegenwart die Weichen für eine zukunftsverträgliche nachhaltige Entwicklung zu stellen. (BDF Nachhaltigkeitsbericht 2010)

Wer in fünf Jahren erfolgreich sein will, der muss heute die richtigen Weichen stellen. (Telekom GB 2010)

Eine Synthese von GEGENWART und ZUKUNFT wird dagegen durch *beginnen* vorgenommen:

Die Zukunft beginnt heute. (BDF Imagebroschüre)

Die Zukunft beginnt jetzt. (Lufthansa GB 2010)

Während sich der Rezipient bei den bisherigen Belegen perspektivisch in der GEGENWART befindet, ist die folgende Aussage retrospektivisch aus der ZUKUNFT im Perfekt formuliert:

Die Zukunft hat schon begonnen. (Daimler Das Unternehmen 2011)

Der Rezipient blickt dadurch quasi aus der ZUKUNFT auf die GEGENWART zurück, was sich mit den obigen Befunden zu ›Entgrenzung‹ bei DAIMLER deckt.

#### ***1.2.15.4 Fazit: ZEIT***

Das Kapitel ZEIT offenbarte zusammenfassend einen prägnanten Zukunftsbezug (›Zukunftsfixierung‹, ›Zukunftsrichtung‹), der als Diskursbedingung offenbar die zeitreferentielle Ordnung von UNTERNEHMENSIDENTITÄT bestimmt. Auf dieses Zukunftsziel richten sich Unternehmen kollektiv aus, sodass die GEGENWART im Diskurs kaum präsent ist (›Gegenwartsevaluation‹ ‚negativ‘); teilweise erscheint die ZUKUNFT als bereits existierende GEGENWART.<sup>509</sup>

Die Sinnzuschreibung an EREIGNISSE aus der TRADITION dient dagegen vor allem dazu, durch Beschreibungen der historischen EREIGNISSE die Glaubwürdigkeit des Unternehmens für die ZUKUNFT zu bestärken. Aus der Rekonstruktion bedeutsamer EREIGNISSE wird gezeigt, wie ein Unternehmen zu dem wurde, was es heute ist – und was es weiter wird bzw. *wird*, indem vergangene ERFAHRUNGEN auf die ZUKUNFT projiziert werden, um Sicherheit im und für das

---

<sup>509</sup> Mikunda (1996, 66) sieht die Position ›Zeit ist Zukunft‹ als westliche Perspektive. Auf diese Perspektivierung weist auch die Häufung von Substantiven im Korpus hin, die auf ZUKUNFT referieren (*Vision, Strategie, Innovationen, Nachhaltigkeit, Chance, Verbesserung, Veränderung* etc.).

unternehmerische Handeln zu erlangen. Durch diese Darstellung von Kohärenz und Kontinuität des Unternehmens entsteht letztlich dessen temporale (zukunftsgerichtete) UNTERNEHMENSIDENTITÄT.

#### **1.2.16 Fazit: Weitere Sachverhalte, die UNTERNEHMENSIDENTITÄT kokonstituieren**

Durch die empirische Auswertung der Repräsentationstexte konnten konkrete ausdrucksseitige Muster sowie inhaltliche Schemata und Sprachhandlungen eruiert werden, die auf den Sachverhalt UNTERNEHMENSIDENTITÄT verweisen. Diese wurden mittels der (handlungsleitenden) Konzepte metasprachlich als Texturtypen modelliert und UNTERNEHMENSIDENTITÄT sowie weiteren Sachverhalten, die UNTERNEHMENSIDENTITÄT kokonstituieren, zugeordnet. Daraus entstand ein komplexes sprachliches Kompendium, wobei die kokonstituierenden Sachverhalte in ihrer Bedeutung für das Gesamtkonstrukt UNTERNEHMENSIDENTITÄT aufgeschlüsselt wurden, was Korpusbelege empirisch fundierten.
